# Supplementary material for: Unveiling the mechanism and origin of stereocontrol in dinuclear-zinc-catalyzed reductive desymmetrization of malonic esters
Source: Royal Society of Chemistry journal article supplement (doi:10.1039/d3qo00846k), 2023-01-01
Supplement: d3qo00846k1.pdf [file d3qo00846k1.pdf]

## Supporting Information

### **Unveiling the mechanism and origin of stereocontrol in dinuclear-zinc-catalysed reductive desymmetrization of malonic esters**

Hui Xu, and Yanfeng Dang\*

Tianjin Key Laboratory of Molecular Optoelectronic Sciences, Department of Chemistry, School of  
Science, Tianjin University, Tianjin 300072, China.

*E-mail:* yanfeng.dang@tju.edu.cn

#### Table of Contents

- ◆ Figures S1–S12
- ◆ Energies and Cartesian Coordinates (Å) for the Optimized Structures

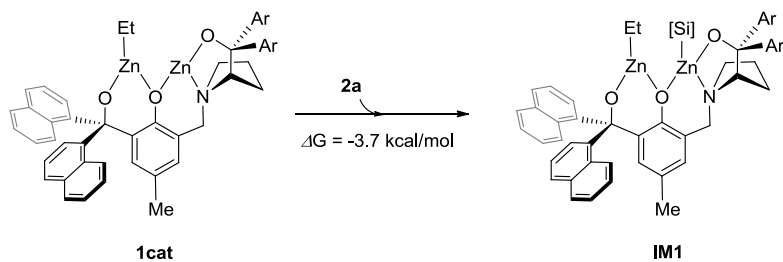

**Fig. S1.** The formation of dinuclear zinc complex **IM1** via the coordination of silane **2a**.

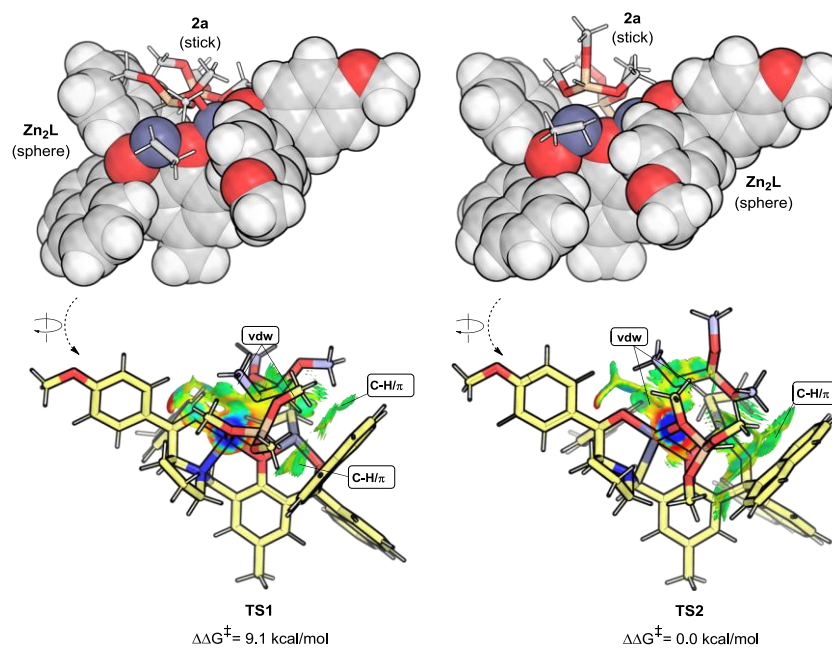

**Fig. S2.** Optimized geometries (Space-filling model = Zn-PrePhenol skeleton; Stick model = Et group and HSi(OMe)<sub>3</sub>) and isosurfaces of  $\delta g^{\text{inter}} = 0.05 \text{ a.u.}$  corresponding to IGMH analysis for **TS1** and **TS2**.

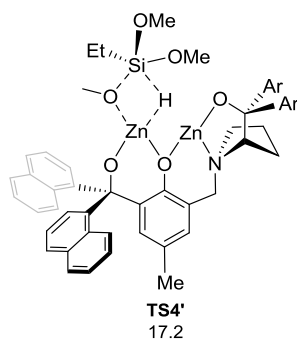

**Fig. S3.** Possible pathway for the formation of active Zn-H catalyst **IM2** via  $\sigma$ -bond metathesis.

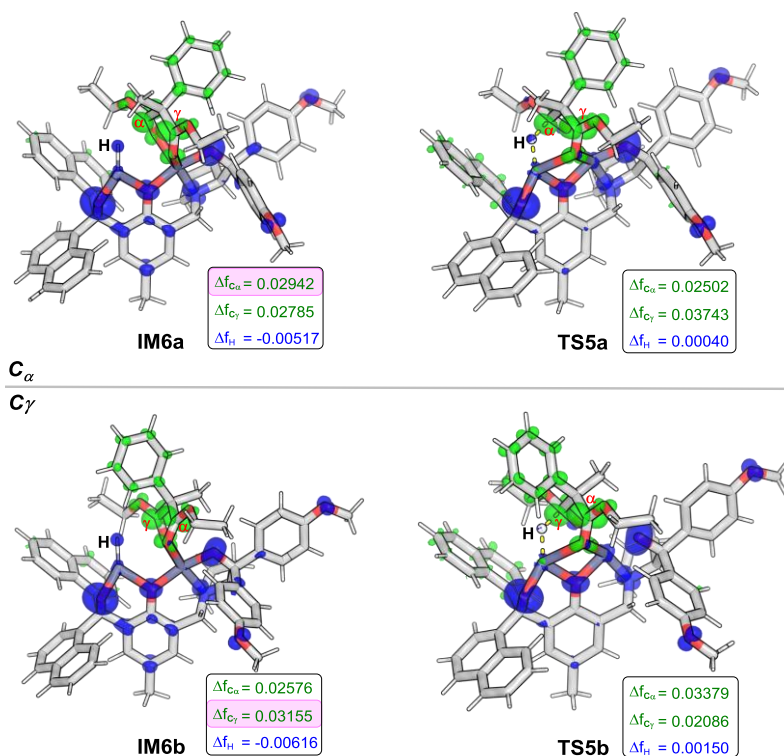

**Fig. S4.** Topology of dual descriptor isosurfaces and DFT calculations of the condensed dual descriptor.

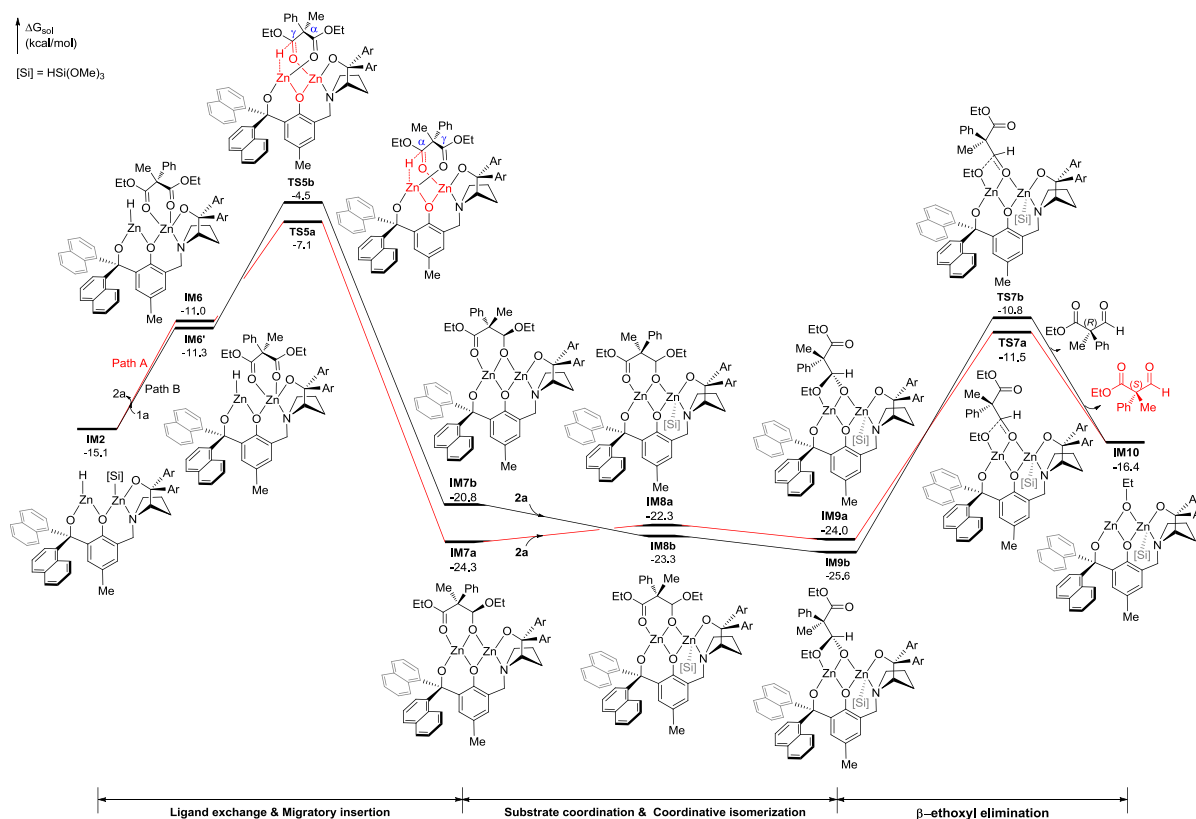

**Fig. S5.** Free energy profiles for the formation of (*S*)-aldehyde and its enantiomer (*R*)-aldehyde.

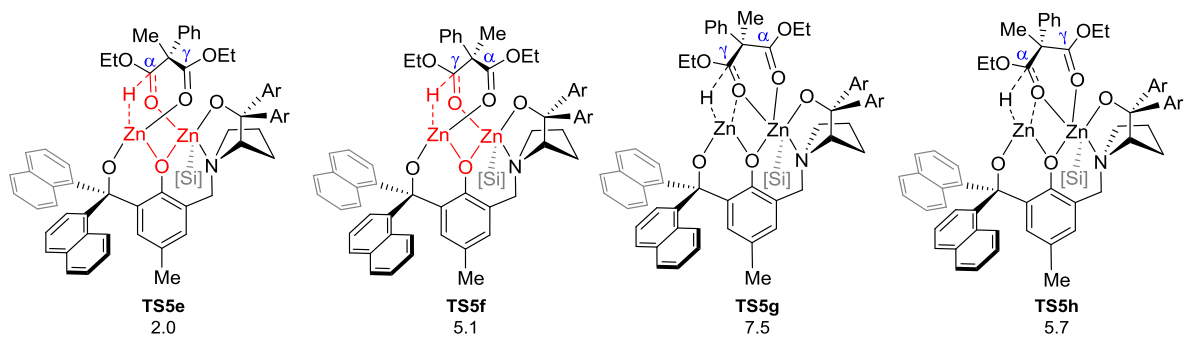

**Fig. S6.** Possible pathways for migratory insertion of ester C=O into Zn–H with HSi(OMe)<sub>3</sub> as a ligand.

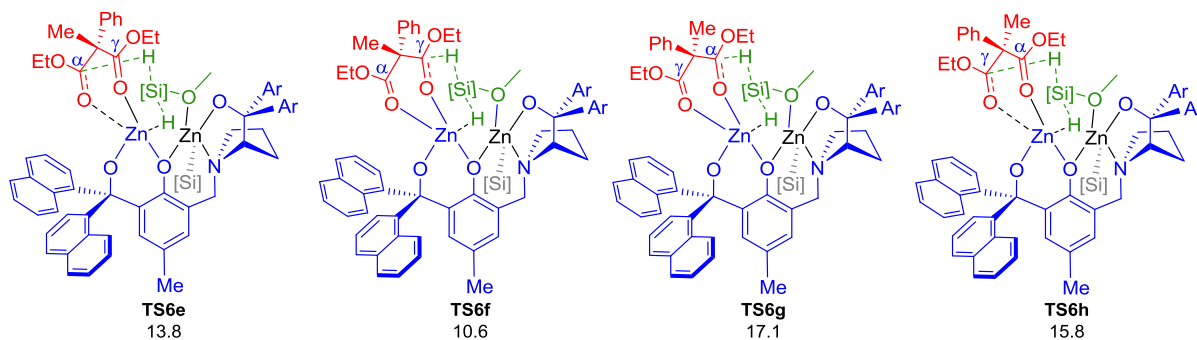

**Fig. S7.** Possible pathways for H-shuttle mechanism with HSi(OMe)<sub>3</sub> as a ligand.

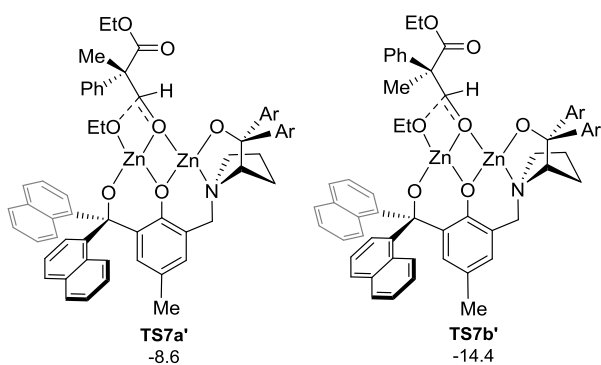

**Fig. S8.** Possible transition states for decomposition of hemiacetal without HSi(OMe)<sub>3</sub> as a ligand.

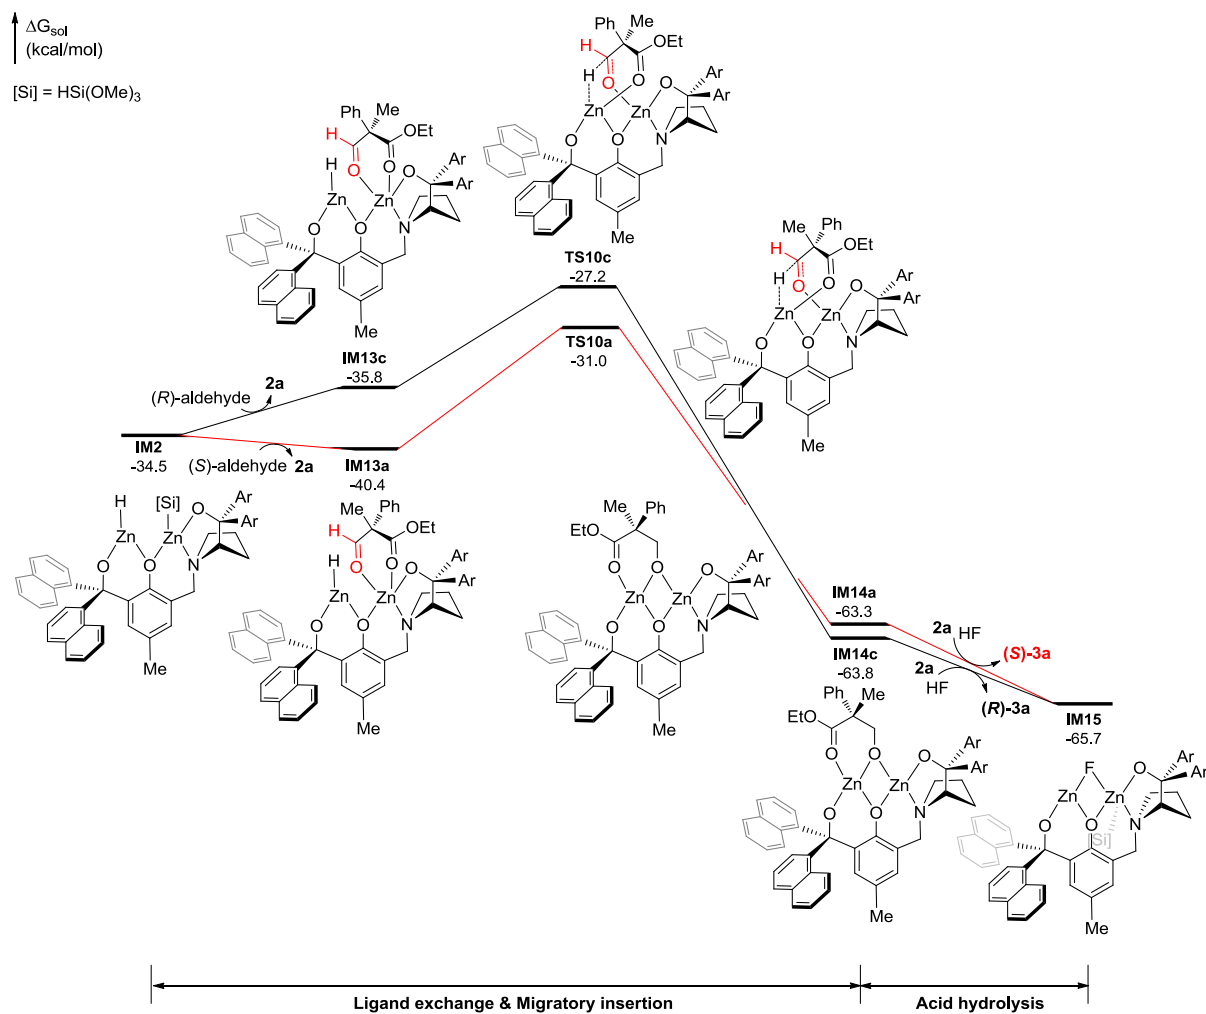

**Fig. S9.** Free energy profiles for formation of the major product (*S*)-3a and minor product (*R*)-3a.

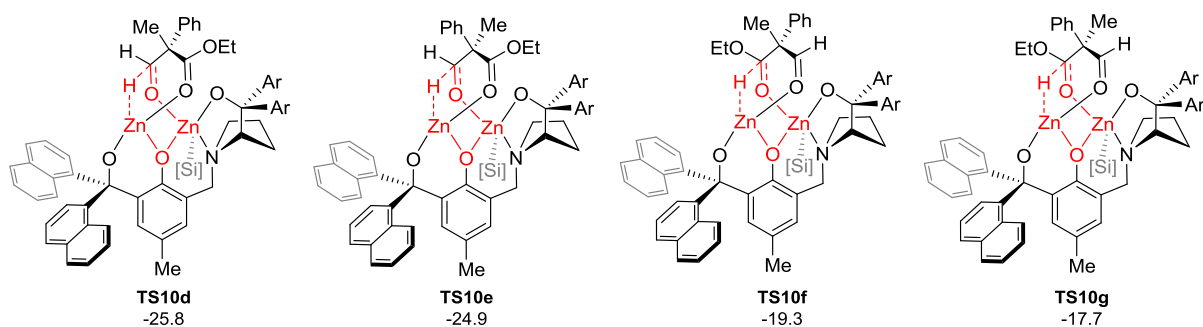

**Fig. S10.** Possible pathways for the migratory insertion transition states with HSi(OMe)<sub>3</sub> as a ligand.

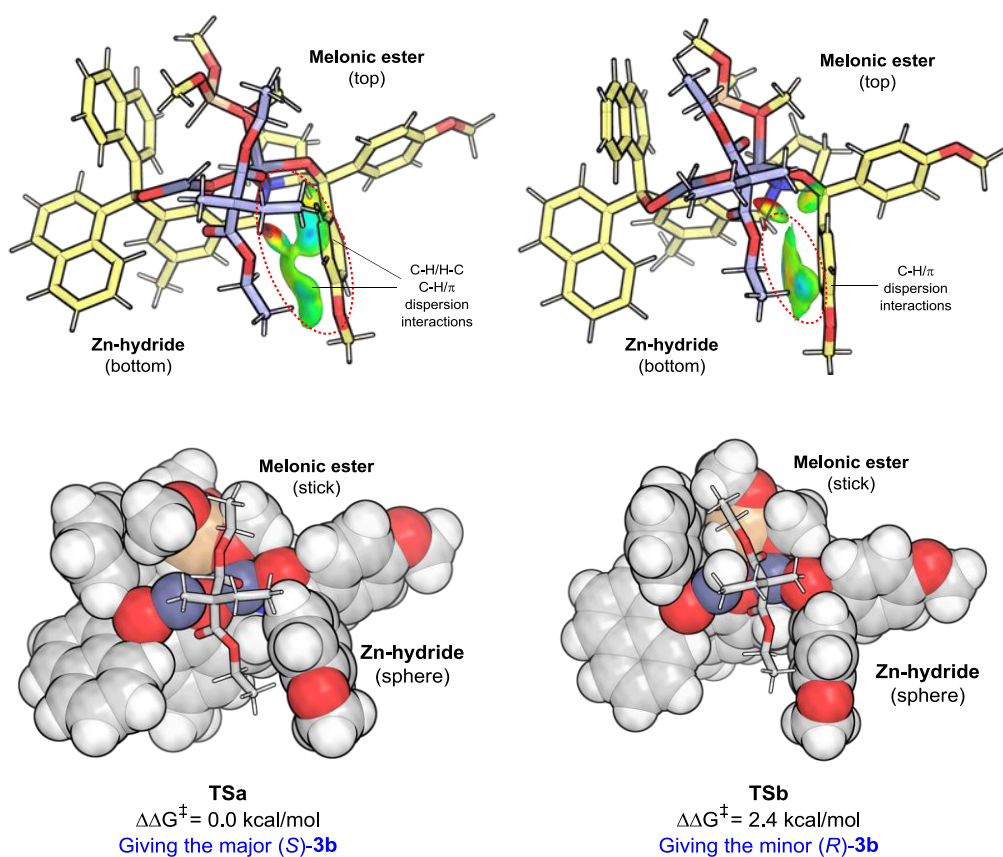

**Fig. S11.** Origins of stereoselectivity in catalytic reductive desymmetrization of malonic ester **1b** (Et vs Me). Top: Comparison of key NCIs by IGMH analysis. Bottom: TSs shown in sphere (Zn-hydride)-stick (malonic ester) representation.

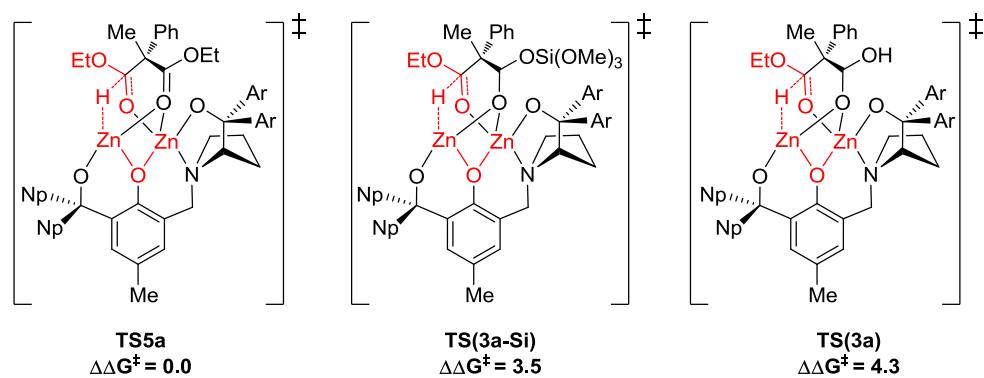

**Fig. S12.** Key transition states of the migratory insertion step.

## Energies and Cartesian Coordinates (Å) for the Optimized Structures

|                                                     |           |           |           |   |           |           |           |
|-----------------------------------------------------|-----------|-----------|-----------|---|-----------|-----------|-----------|
| <b>ZnEt<sub>2</sub></b>                             |           |           |           | H | 1.607568  | -0.078797 | 4.106217  |
| M06L SCF energy in Solvent: -1937.452342 a.u.       |           |           |           | H | 0.325023  | -0.902218 | 3.192069  |
| PBE0-D3BJ Free energy in Solvent: -1937.355266 a.u. |           |           |           | C | 2.305598  | -1.860106 | 3.067640  |
| Zn                                                  | 0.000000  | 0.000000  | 0.000064  | H | 1.906376  | -2.552430 | 2.315633  |
| C                                                   | 0.000000  | 1.953159  | 0.000023  | H | 2.421024  | -2.406194 | 4.010265  |
| H                                                   | 0.575547  | 2.294181  | 0.873303  | C | 3.605870  | -1.238908 | 2.566199  |
| H                                                   | 0.575716  | 2.294141  | -0.873160 | H | 4.198141  | -1.936196 | 1.966625  |
| C                                                   | -1.376546 | 2.612811  | -0.000124 | H | 4.232928  | -0.928360 | 3.411891  |
| H                                                   | -1.312351 | 3.710756  | -0.000149 | C | 3.177331  | 0.000674  | 1.751745  |
| H                                                   | -1.969312 | 2.333003  | -0.880540 | H | 3.693682  | 0.905351  | 2.125634  |
| H                                                   | -1.969474 | 2.333053  | 0.880198  | C | 3.444620  | -0.153802 | 0.221086  |
| C                                                   | 0.000000  | -1.953159 | 0.000023  | C | 4.856740  | -0.639596 | -0.070875 |
| H                                                   | -0.575547 | -2.294181 | 0.873303  | C | 5.958568  | -0.213350 | 0.668951  |
| H                                                   | -0.575716 | -2.294141 | -0.873160 | H | 5.817726  | 0.442666  | 1.528966  |
| C                                                   | 1.376546  | -2.612811 | -0.000124 | C | 7.254953  | -0.618517 | 0.354158  |
| H                                                   | 1.312351  | -3.710756 | -0.000149 | H | 8.085289  | -0.269076 | 0.962367  |
| H                                                   | 1.969312  | -2.333003 | -0.880540 | C | 7.463980  | -1.471986 | -0.729978 |
| H                                                   | 1.969474  | -2.333053 | 0.880198  | C | 6.368404  | -1.910514 | -1.480074 |
|                                                     |           |           |           | H | 6.548824  | -2.579803 | -2.318779 |
| <b>(S)-L</b>                                        |           |           |           | C | 5.087190  | -1.498045 | -1.152176 |
| M06L SCF energy in Solvent: -2285.409310 a.u.       |           |           |           | H | 4.237245  | -1.845635 | -1.734253 |
| PBE0-D3BJ Free energy in Solvent: -2284.668103 a.u. |           |           |           | C | 3.250559  | 1.171946  | -0.528793 |
| O                                                   | -0.256334 | 0.242853  | -0.131288 | C | 3.926181  | 2.331833  | -0.147276 |
| O                                                   | 2.550801  | -1.141626 | -0.255938 | H | 4.598918  | 2.312211  | 0.711045  |
| N                                                   | 1.726165  | 0.101818  | 1.981960  | C | 3.770328  | 3.532995  | -0.834651 |
| C                                                   | -1.025530 | 0.713477  | 0.883862  | H | 4.311307  | 4.414685  | -0.500428 |
| C                                                   | -2.421343 | 0.526052  | 0.927204  | C | 2.928749  | 3.583103  | -1.948408 |
| C                                                   | -3.125680 | 1.028618  | 2.024345  | C | 2.258291  | 2.426171  | -2.354139 |
| H                                                   | -4.204049 | 0.879404  | 2.069941  | C | 2.422920  | 1.241405  | -1.653263 |
| C                                                   | -2.497469 | 1.698672  | 3.072479  | H | 1.896377  | 0.343407  | -1.966153 |
| C                                                   | -1.107510 | 1.829412  | 3.016390  | C | -3.111098 | -0.347552 | -0.120639 |
| H                                                   | -0.578428 | 2.313861  | 3.840314  | O | -2.549935 | 0.097959  | -1.400294 |
| C                                                   | -0.361505 | 1.352419  | 1.945053  | C | -4.628060 | -0.135564 | -0.114257 |
| C                                                   | -3.285703 | 2.259343  | 4.217173  | C | -5.202662 | 1.113544  | -0.523969 |
| H                                                   | -4.267358 | 1.780159  | 4.305102  | C | -5.458780 | -1.134211 | 0.355010  |
| H                                                   | -3.465737 | 3.336799  | 4.097649  | C | -4.441125 | 2.241814  | -0.928588 |
| H                                                   | -2.764260 | 2.131903  | 5.173774  | C | -6.631492 | 1.255043  | -0.486193 |
| C                                                   | 1.138282  | 1.432268  | 1.931157  | C | -6.858441 | -0.985174 | 0.397699  |
| H                                                   | 1.481185  | 1.919457  | 1.010656  | H | -5.023317 | -2.070986 | 0.696206  |
| H                                                   | 1.482698  | 2.056939  | 2.783220  | C | -5.050653 | 3.419944  | -1.293355 |
| C                                                   | 1.395697  | -0.657324 | 3.179655  | H | -3.359378 | 2.174355  | -0.947847 |

|                                                    |           |           |           |                                                    |           |           |           |
|----------------------------------------------------|-----------|-----------|-----------|----------------------------------------------------|-----------|-----------|-----------|
| C                                                  | -7.224193 | 2.478067  | -0.884385 | O                                                  | 0.716269  | 0.917912  | -1.551220 |
| C                                                  | -7.434525 | 0.183197  | -0.029701 | O                                                  | -0.012724 | 2.172940  | 0.178808  |
| H                                                  | -7.472990 | -1.804852 | 0.765159  | C                                                  | 0.110494  | 3.335820  | -0.668629 |
| C                                                  | -6.454108 | 3.542715  | -1.282566 | H                                                  | 1.139185  | 3.382034  | -1.044623 |
| H                                                  | -4.437697 | 4.268726  | -1.591362 | H                                                  | -0.545451 | 3.200374  | -1.536772 |
| H                                                  | -8.310964 | 2.557904  | -0.855229 | C                                                  | -0.262762 | 4.535579  | 0.156970  |
| H                                                  | -8.516705 | 0.312987  | -0.011257 | H                                                  | 0.404138  | 4.644298  | 1.018678  |
| H                                                  | -6.921895 | 4.479623  | -1.580338 | H                                                  | -0.190537 | 5.445982  | -0.447290 |
| C                                                  | -2.712253 | -1.828873 | 0.052723  | H                                                  | -1.289441 | 4.453907  | 0.528909  |
| C                                                  | -3.015618 | -2.796045 | -0.966220 | C                                                  | 0.075862  | -0.186305 | 0.514048  |
| C                                                  | -1.994008 | -2.238591 | 1.158254  | C                                                  | 1.087768  | -1.263675 | 0.087839  |
| C                                                  | -3.840470 | -2.535139 | -2.096074 | O                                                  | 0.831222  | -2.367040 | -0.332025 |
| C                                                  | -2.472111 | -4.119677 | -0.846425 | O                                                  | 2.339696  | -0.802149 | 0.273505  |
| C                                                  | -1.497049 | -3.550200 | 1.289147  | C                                                  | 3.385358  | -1.699736 | -0.150084 |
| H                                                  | -1.786061 | -1.522335 | 1.949300  | H                                                  | 3.316946  | -2.620525 | 0.441921  |
| C                                                  | -4.066895 | -3.489293 | -3.063243 | H                                                  | 3.200186  | -1.971701 | -1.195747 |
| H                                                  | -4.364476 | -1.584024 | -2.179605 | C                                                  | 4.695419  | -0.986505 | 0.039954  |
| C                                                  | -2.719432 | -5.073388 | -1.862425 | H                                                  | 4.852462  | -0.719634 | 1.090626  |
| C                                                  | -1.708616 | -4.466833 | 0.293151  | H                                                  | 5.524359  | -1.629143 | -0.274952 |
| H                                                  | -0.927711 | -3.817581 | 2.177491  | H                                                  | 4.730131  | -0.067664 | -0.554365 |
| C                                                  | -3.490082 | -4.768856 | -2.958248 | C                                                  | 0.326100  | 0.167776  | 1.981683  |
| H                                                  | -4.710522 | -3.252076 | -3.908272 | H                                                  | 0.168009  | -0.709716 | 2.619196  |
| H                                                  | -2.285799 | -6.066930 | -1.749807 | H                                                  | 1.353413  | 0.513445  | 2.121136  |
| H                                                  | -1.304433 | -5.476285 | 0.363868  | H                                                  | -0.347048 | 0.963033  | 2.311177  |
| H                                                  | -3.669671 | -5.514203 | -3.730287 | C                                                  | -1.352626 | -0.650083 | 0.237417  |
| O                                                  | 8.684484  | -1.931850 | -1.130540 | C                                                  | -2.338617 | -0.640843 | 1.225318  |
| H                                                  | 1.611014  | 2.480336  | -3.227072 | C                                                  | -1.701317 | -1.061962 | -1.054472 |
| O                                                  | 2.702489  | 4.700912  | -2.697273 | C                                                  | -3.641348 | -1.039932 | 0.933256  |
| C                                                  | 3.378226  | 5.874210  | -2.310511 | H                                                  | -2.097785 | -0.325205 | 2.237904  |
| H                                                  | 4.470329  | 5.747660  | -2.351820 | C                                                  | -3.000370 | -1.457520 | -1.345870 |
| H                                                  | 3.077751  | 6.645664  | -3.022719 | H                                                  | -0.940955 | -1.073596 | -1.832046 |
| H                                                  | 3.098156  | 6.190152  | -1.294411 | C                                                  | -3.977470 | -1.447988 | -0.352282 |
| C                                                  | 9.802406  | -1.499123 | -0.391883 | H                                                  | -4.394864 | -1.028241 | 1.719228  |
| H                                                  | 9.912025  | -0.404832 | -0.422461 | H                                                  | -3.250883 | -1.776995 | -2.356034 |
| H                                                  | 9.744757  | -1.818402 | 0.659521  | H                                                  | -4.995915 | -1.757525 | -0.580882 |
| H                                                  | 10.673248 | -1.961771 | -0.861381 |                                                    |           |           |           |
| H                                                  | 1.688970  | -0.888274 | 0.141068  | <b>2a</b>                                          |           |           |           |
| H                                                  | -0.868757 | 0.059760  | -0.878614 | M06L SCF energy in Solvent: -635.262656 a.u.       |           |           |           |
| H                                                  | -2.766413 | -0.568984 | -2.071532 | PBE0-D3BJ Free energy in Solvent: -635.160431 a.u. |           |           |           |
|                                                    |           |           |           |                                                    |           |           |           |
| <b>1a</b>                                          |           |           |           | Si                                                 | 0.000549  | -0.247499 | 0.302268  |
| M06L SCF energy in Solvent: -844.652166 a.u.       |           |           |           | H                                                  | 0.000604  | 0.102397  | 1.741517  |
| PBE0-D3BJ Free energy in Solvent: -844.400423 a.u. |           |           |           | O                                                  | 1.293499  | -1.167558 | -0.109281 |
| C                                                  | 0.321565  | 1.012636  | -0.408247 | O                                                  | -1.291004 | -1.169808 | -0.108709 |



|   |           |           |           |
|---|-----------|-----------|-----------|
| O | -0.000841 | 1.177966  | -0.536706 |
| C | 2.592283  | -0.616825 | -0.076837 |
| H | 3.304766  | -1.418693 | -0.292578 |
| H | 2.712103  | 0.173779  | -0.830697 |
| H | 2.840681  | -0.196264 | 0.911016  |
| C | -2.590641 | -0.621064 | -0.077063 |
| H | -2.710976 | 0.169987  | -0.830385 |
| H | -3.301699 | -1.423837 | -0.294145 |
| H | -2.840608 | -0.201715 | 0.910907  |
| C | -0.003694 | 2.433131  | 0.102763  |
| H | -0.005635 | 3.208635  | -0.669801 |
| H | -0.894580 | 2.575164  | 0.733551  |
| H | 0.886733  | 2.579284  | 0.733246  |

**C<sub>2</sub>H<sub>6</sub>**

M06L SCF energy in Solvent: -79.755064 a.u.

PBE0-D3BJ Free energy in Solvent: -79.701025 a.u.

|   |           |           |           |
|---|-----------|-----------|-----------|
| C | 0.000000  | 0.000000  | 0.758179  |
| H | -0.509536 | 0.882905  | 1.161766  |
| H | 1.019386  | -0.000181 | 1.161766  |
| H | -0.509850 | -0.882724 | 1.161766  |
| C | 0.000000  | 0.000000  | -0.758179 |
| H | 0.509850  | -0.882724 | -1.161766 |
| H | -1.019386 | -0.000181 | -1.161766 |
| H | 0.509536  | 0.882905  | -1.161766 |

**icat**

M06L SCF energy in Solvent: -5921.153863 a.u.

PBE0-D3BJ Free energy in Solvent: -5920.38752 a.u.

|    |           |           |           |
|----|-----------|-----------|-----------|
| Zn | 0.875855  | 0.067543  | -0.652333 |
| Zn | -1.645806 | 1.510195  | 1.490212  |
| O  | -0.579612 | -0.176984 | 0.556696  |
| O  | 2.640376  | 0.485536  | -1.111646 |
| N  | 1.486513  | -2.016389 | -0.668104 |
| C  | -1.269124 | -1.339663 | 0.380517  |
| C  | -2.637531 | -1.313006 | 0.020792  |
| C  | -3.305190 | -2.523701 | -0.140135 |
| H  | -4.351732 | -2.511294 | -0.441800 |
| C  | -2.677225 | -3.761342 | 0.042445  |
| C  | -1.313455 | -3.759315 | 0.321669  |
| H  | -0.777709 | -4.708653 | 0.398586  |
| C  | -0.596907 | -2.571237 | 0.475226  |
| C  | -3.448342 | -5.039238 | -0.088948 |
| H  | -4.140940 | -5.012212 | -0.939075 |

|   |           |           |           |
|---|-----------|-----------|-----------|
| H | -4.057932 | -5.236625 | 0.803432  |
| H | -2.785028 | -5.901612 | -0.223400 |
| C | 0.900235  | -2.586087 | 0.571614  |
| H | 1.256568  | -1.980284 | 1.412873  |
| H | 1.270815  | -3.617293 | 0.713780  |
| C | 1.071947  | -2.753744 | -1.880850 |
| H | 1.144839  | -3.842807 | -1.701920 |
| H | 0.023783  | -2.532529 | -2.118644 |
| C | 2.070521  | -2.305411 | -2.921234 |
| H | 1.836941  | -1.285722 | -3.256169 |
| H | 2.088644  | -2.957135 | -3.800921 |
| C | 3.374629  | -2.297826 | -2.138283 |
| H | 4.120559  | -1.623496 | -2.567677 |
| H | 3.814373  | -3.303393 | -2.126592 |
| C | 2.983650  | -1.883841 | -0.707920 |
| H | 3.417788  | -2.586179 | 0.018755  |
| C | 3.415778  | -0.412469 | -0.355636 |
| C | 4.892020  | -0.234065 | -0.716453 |
| C | 5.876614  | -1.013469 | -0.110557 |
| H | 5.596995  | -1.742330 | 0.651912  |
| C | 7.223223  | -0.875779 | -0.437031 |
| H | 7.961166  | -1.499953 | 0.060387  |
| C | 7.605051  | 0.071796  | -1.389882 |
| C | 6.628755  | 0.863495  | -2.001581 |
| H | 6.946137  | 1.599548  | -2.737532 |
| C | 5.291337  | 0.708906  | -1.667740 |
| H | 4.528552  | 1.322210  | -2.140832 |
| C | 3.276345  | -0.107411 | 1.146498  |
| C | 3.425928  | -1.045343 | 2.170278  |
| H | 3.593400  | -2.097263 | 1.937878  |
| C | 3.362680  | -0.684546 | 3.516342  |
| H | 3.468682  | -1.452359 | 4.278084  |
| C | 3.166236  | 0.652696  | 3.864735  |
| C | 3.044551  | 1.612655  | 2.853918  |
| C | 3.099421  | 1.232249  | 1.524504  |
| H | 3.013835  | 1.980777  | 0.739662  |
| C | -3.277311 | 0.058589  | -0.263110 |
| O | -3.268377 | 0.812700  | 0.923125  |
| C | -4.741547 | -0.046543 | -0.724090 |
| C | -5.769509 | -0.444274 | 0.197047  |
| C | -5.100133 | 0.264712  | -2.021154 |
| C | -5.513415 | -0.833837 | 1.539037  |
| C | -7.129179 | -0.490861 | -0.260388 |
| C | -6.438534 | 0.224903  | -2.462498 |

|   |           |           |           |
|---|-----------|-----------|-----------|
| H | -4.331266 | 0.562317  | -2.731679 |
| C | -6.531242 | -1.238561 | 2.371407  |
| H | -4.493386 | -0.793517 | 1.905389  |
| C | -8.153018 | -0.899811 | 0.629272  |
| C | -7.435732 | -0.141137 | -1.597024 |
| H | -6.669550 | 0.489818  | -3.492939 |
| C | -7.865909 | -1.269175 | 1.920119  |
| H | -6.301456 | -1.533262 | 3.394282  |
| H | -9.178733 | -0.921784 | 0.259820  |
| H | -8.475996 | -0.175653 | -1.921288 |
| H | -8.662600 | -1.585773 | 2.591685  |
| C | -2.391713 | 0.731227  | -1.358744 |
| C | -2.221269 | 2.152099  | -1.423934 |
| C | -1.641775 | -0.052118 | -2.220456 |
| C | -3.106121 | 3.070394  | -0.790166 |
| C | -1.130498 | 2.695258  | -2.188047 |
| C | -0.562711 | 0.475642  | -2.962158 |
| H | -1.824122 | -1.125740 | -2.251206 |
| C | -2.914370 | 4.428461  | -0.898056 |
| H | -3.949290 | 2.676200  | -0.232025 |
| C | -0.949626 | 4.099553  | -2.251080 |
| C | -0.269742 | 1.824030  | -2.895622 |
| H | 0.031378  | -0.184182 | -3.594263 |
| C | -1.823113 | 4.952030  | -1.623594 |
| H | -3.620010 | 5.107755  | -0.423194 |
| H | -0.110077 | 4.486848  | -2.827984 |
| H | 0.587064  | 2.235652  | -3.428291 |
| H | -1.682062 | 6.029243  | -1.691096 |
| C | -0.281902 | 2.690105  | 2.196957  |
| H | 0.410259  | 2.080785  | 2.794274  |
| H | -0.699535 | 3.444326  | 2.875578  |
| C | 0.463717  | 3.368741  | 1.052220  |
| H | 1.347003  | 3.934875  | 1.390225  |
| H | 0.833893  | 2.646254  | 0.303080  |
| H | -0.180287 | 4.069452  | 0.505572  |
| O | 8.891138  | 0.298570  | -1.781714 |
| H | 2.899822  | 2.653628  | 3.136569  |
| O | 3.082959  | 1.115842  | 5.141020  |
| C | 3.185630  | 0.163774  | 6.176058  |
| H | 4.158143  | -0.349820 | 6.160343  |
| H | 3.086949  | 0.720947  | 7.109598  |
| H | 2.385626  | -0.588189 | 6.114642  |
| C | 9.891628  | -0.478922 | -1.165572 |
| H | 9.918424  | -0.318744 | -0.077573 |

|   |           |           |           |
|---|-----------|-----------|-----------|
| H | 9.749888  | -1.552391 | -1.360672 |
| H | 10.838734 | -0.154656 | -1.601384 |

### IM1

M06L SCF energy in Solvent: -6556.448453 a.u.

PBE0-D3BJ Free energy in Solvent: -6555.550870 a.u.

|   |           |           |           |
|---|-----------|-----------|-----------|
| O | -0.443381 | -0.107062 | 0.214898  |
| C | -0.968916 | 0.670105  | 1.195095  |
| C | -2.370837 | 0.874692  | 1.263789  |
| C | -2.887563 | 1.555869  | 2.365498  |
| H | -3.967997 | 1.686729  | 2.430041  |
| C | -2.090512 | 2.093390  | 3.377327  |
| C | -0.713013 | 1.979137  | 3.224714  |
| H | -0.049663 | 2.449919  | 3.954708  |
| C | -0.137250 | 1.304334  | 2.146931  |
| C | -2.698732 | 2.787099  | 4.558251  |
| H | -3.114945 | 2.074550  | 5.284362  |
| H | -3.522255 | 3.447961  | 4.261197  |
| H | -1.960100 | 3.395424  | 5.093262  |
| C | -3.299595 | 0.410531  | 0.115204  |
| O | -2.735203 | 0.766926  | -1.122627 |
| C | -4.661988 | 1.142699  | 0.183032  |
| C | -4.738516 | 2.553458  | -0.078794 |
| C | -5.826998 | 0.462234  | 0.477174  |
| C | -3.603720 | 3.366945  | -0.338727 |
| C | -6.021733 | 3.195360  | -0.047897 |
| C | -7.085438 | 1.098280  | 0.503692  |
| H | -5.788083 | -0.602538 | 0.694833  |
| C | -3.729632 | 4.718012  | -0.566420 |
| H | -2.625026 | 2.900235  | -0.372337 |
| C | -6.114797 | 4.586726  | -0.295843 |
| C | -7.182827 | 2.438775  | 0.240081  |
| H | -7.974233 | 0.512941  | 0.733991  |
| C | -4.994764 | 5.338684  | -0.552043 |
| H | -2.839135 | 5.312455  | -0.765470 |
| H | -7.102197 | 5.049315  | -0.272768 |
| H | -8.148043 | 2.945991  | 0.253892  |
| H | -5.081003 | 6.408166  | -0.739222 |
| C | -3.529130 | -1.117894 | 0.219189  |
| C | -3.934723 | -1.898415 | -0.918575 |
| C | -3.382321 | -1.758685 | 1.435522  |
| C | -4.268013 | -1.338317 | -2.185397 |
| C | -4.045359 | -3.324948 | -0.780804 |
| C | -3.563892 | -3.148871 | 1.581051  |

|    |           |           |           |
|----|-----------|-----------|-----------|
| H  | -3.102125 | -1.171542 | 2.308843  |
| C  | -4.602465 | -2.138168 | -3.254777 |
| H  | -4.252600 | -0.259289 | -2.294184 |
| C  | -4.378614 | -4.116296 | -1.908165 |
| C  | -3.852578 | -3.926150 | 0.486155  |
| H  | -3.459340 | -3.603855 | 2.565066  |
| C  | -4.637897 | -3.541338 | -3.128038 |
| H  | -4.852999 | -1.676541 | -4.208633 |
| H  | -4.442726 | -5.197720 | -1.777368 |
| H  | -3.963778 | -5.007491 | 0.578055  |
| H  | -4.895632 | -4.160902 | -3.985280 |
| H  | -1.439413 | -2.656794 | -0.354695 |
| Si | -0.436983 | -3.341393 | 0.448375  |
| O  | 1.013369  | -2.830772 | -0.251806 |
| O  | -0.256063 | -2.911349 | 2.018993  |
| O  | -0.567870 | -4.979008 | 0.370249  |
| C  | 2.176586  | -3.675236 | -0.231037 |
| H  | 2.054099  | -4.470594 | -0.973454 |
| H  | 3.033795  | -3.045108 | -0.480270 |
| H  | 2.315549  | -4.126414 | 0.760410  |
| C  | -1.001224 | -5.602761 | -0.827686 |
| H  | -0.137053 | -5.938086 | -1.416210 |
| H  | -1.607502 | -6.476207 | -0.564606 |
| H  | -1.612774 | -4.931115 | -1.449757 |
| C  | -0.662301 | -3.638784 | 3.159072  |
| H  | -1.204373 | -4.554986 | 2.893112  |
| H  | 0.226771  | -3.912894 | 3.741829  |
| H  | -1.307560 | -3.005095 | 3.780109  |
| Zn | 1.364848  | -0.773245 | 0.138722  |
| O  | 3.131255  | -0.766627 | -0.526220 |
| N  | 2.073936  | 0.133654  | 1.918223  |
| C  | 1.349007  | 1.420659  | 1.954280  |
| H  | 1.552259  | 1.937911  | 1.010011  |
| H  | 1.779109  | 2.047724  | 2.756738  |
| C  | 1.949270  | -0.605401 | 3.184690  |
| H  | 2.220278  | 0.062143  | 4.024741  |
| H  | 0.913246  | -0.930522 | 3.327001  |
| C  | 2.950831  | -1.724802 | 3.017221  |
| H  | 2.500540  | -2.514597 | 2.399190  |
| H  | 3.242161  | -2.181134 | 3.969274  |
| C  | 4.116670  | -1.053953 | 2.280174  |
| H  | 4.543935  | -1.707413 | 1.511624  |
| H  | 4.930220  | -0.795408 | 2.967726  |
| C  | 3.539856  | 0.222652  | 1.632946  |

|    |           |           |           |
|----|-----------|-----------|-----------|
| H  | 3.925141  | 1.130698  | 2.129578  |
| C  | 3.819880  | 0.277503  | 0.084427  |
| C  | 5.320157  | 0.102413  | -0.170052 |
| C  | 6.308821  | 0.608904  | 0.672409  |
| H  | 6.036609  | 1.138460  | 1.586321  |
| C  | 7.666184  | 0.448376  | 0.392004  |
| H  | 8.404401  | 0.850415  | 1.080973  |
| C  | 8.053724  | -0.231412 | -0.763171 |
| C  | 7.074023  | -0.739335 | -1.622634 |
| H  | 7.393223  | -1.267576 | -2.518809 |
| C  | 5.731922  | -0.572916 | -1.325483 |
| H  | 4.968341  | -0.974976 | -1.986947 |
| O  | 9.347036  | -0.454701 | -1.133366 |
| C  | 10.349942 | 0.044183  | -0.279501 |
| H  | 10.296708 | 1.138934  | -0.184979 |
| H  | 10.286587 | -0.400173 | 0.725102  |
| H  | 11.302390 | -0.232334 | -0.736453 |
| C  | 3.382733  | 1.634580  | -0.497821 |
| C  | 2.434187  | 1.695636  | -1.526467 |
| C  | 3.879699  | 2.842340  | -0.005925 |
| C  | 1.964905  | 2.910173  | -2.007675 |
| H  | 2.065769  | 0.767772  | -1.963597 |
| C  | 3.425338  | 4.071144  | -0.477005 |
| H  | 4.644183  | 2.834609  | 0.772257  |
| C  | 2.450890  | 4.109271  | -1.479477 |
| H  | 1.222614  | 2.954106  | -2.802463 |
| H  | 3.835423  | 4.988186  | -0.061817 |
| O  | 1.930569  | 5.251285  | -2.006918 |
| C  | 2.415649  | 6.471532  | -1.494950 |
| H  | 3.496822  | 6.581834  | -1.664894 |
| H  | 1.883768  | 7.258192  | -2.033566 |
| H  | 2.214258  | 6.568677  | -0.417941 |
| Zn | -1.297969 | -0.231013 | -1.732763 |
| C  | -0.116803 | -1.190784 | -2.957212 |
| H  | 0.905679  | -1.229506 | -2.544120 |
| H  | -0.459106 | -2.239065 | -2.958021 |
| C  | -0.070097 | -0.659604 | -4.385333 |
| H  | 0.311173  | 0.369330  | -4.428894 |
| H  | 0.578181  | -1.264346 | -5.036949 |
| H  | -1.065577 | -0.646084 | -4.847885 |

### TS1

M06L SCF energy in Solvent: -7191.686277 a.u.

PBE0-D3BJ Free energy in Solvent: -7190.651661 a.u.

|   |          |           |           |    |           |           |           |
|---|----------|-----------|-----------|----|-----------|-----------|-----------|
| O | 0.622524 | 0.304252  | -0.206117 | C  | 4.717676  | -4.144877 | 1.811603  |
| C | 1.129827 | 1.138600  | -1.167976 | H  | 5.165681  | -2.551380 | 3.209052  |
| C | 2.526943 | 1.233922  | -1.420058 | H  | 4.241105  | -5.477966 | 0.199611  |
| C | 2.945283 | 2.049278  | -2.472474 | H  | 3.534619  | -4.798841 | -1.981375 |
| H | 4.010662 | 2.093396  | -2.694184 | H  | 5.028055  | -4.938618 | 2.489726  |
| C | 2.079618 | 2.820182  | -3.249555 | H  | 1.193550  | -2.415003 | -0.497078 |
| C | 0.725994 | 2.748213  | -2.947592 | Si | 0.222289  | -3.498360 | -0.601937 |
| H | 0.009142 | 3.341480  | -3.519979 | O  | -1.227880 | -2.665392 | -0.772858 |
| C | 0.246193 | 1.929016  | -1.926289 | O  | 0.196358  | -4.458958 | -1.934989 |
| C | 2.603312 | 3.697278  | -4.345494 | O  | 0.281701  | -4.501835 | 0.698942  |
| H | 3.288976 | 4.461831  | -3.956985 | C  | -2.455175 | -3.397587 | -0.899321 |
| H | 1.792420 | 4.216665  | -4.868620 | H  | -2.399219 | -4.337048 | -0.335250 |
| H | 3.166755 | 3.125106  | -5.094160 | H  | -3.252248 | -2.766510 | -0.494351 |
| C | 3.570152 | 0.482263  | -0.554199 | H  | -2.642118 | -3.626900 | -1.954688 |
| O | 3.362769 | 0.787933  | 0.799885  | C  | 1.023089  | -4.215550 | 1.872405  |
| C | 5.013501 | 0.971642  | -0.847594 | H  | 0.343493  | -3.946263 | 2.690816  |
| C | 5.405526 | 2.311870  | -0.498534 | H  | 1.586582  | -5.112966 | 2.153638  |
| C | 5.958665 | 0.135731  | -1.408409 | H  | 1.738516  | -3.391648 | 1.722185  |
| C | 4.517692 | 3.281910  | 0.040463  | C  | 0.836821  | -5.711113 | -2.046026 |
| C | 6.758334 | 2.723731  | -0.744791 | H  | 1.494628  | -5.703532 | -2.923953 |
| C | 7.290421 | 0.542015  | -1.630678 | H  | 1.432283  | -5.960446 | -1.156516 |
| H | 5.683331 | -0.876762 | -1.692165 | H  | 0.078971  | -6.492345 | -2.183785 |
| C | 4.934832 | 4.563746  | 0.315857  | Zn | -1.206352 | -0.580083 | -0.204846 |
| H | 3.492175 | 2.995473  | 0.246686  | O  | -3.062551 | -0.466998 | 0.221628  |
| C | 7.156363 | 4.048441  | -0.438209 | N  | -1.780129 | 0.536883  | -2.002791 |
| C | 7.685223 | 1.811468  | -1.303025 | C  | -1.224962 | 1.868465  | -1.675367 |
| H | 7.996954 | -0.163295 | -2.065136 | H  | -1.460027 | 2.080760  | -0.621959 |
| C | 6.266943 | 4.956890  | 0.079877  | H  | -1.746130 | 2.635695  | -2.276986 |
| H | 4.224889 | 5.280728  | 0.725511  | C  | -1.394261 | 0.077380  | -3.348487 |
| H | 8.191172 | 4.332268  | -0.632632 | H  | -1.556759 | 0.895482  | -4.075736 |
| H | 8.709820 | 2.143982  | -1.471801 | H  | -0.327514 | -0.173976 | -3.372342 |
| H | 6.585459 | 5.973380  | 0.306252  | C  | -2.318691 | -1.096130 | -3.610948 |
| C | 3.479397 | -1.033426 | -0.860840 | H  | -1.857535 | -2.019949 | -3.240413 |
| C | 3.898033 | -2.046344 | 0.068178  | H  | -2.499776 | -1.236450 | -4.681657 |
| C | 3.101881 | -1.426381 | -2.134610 | C  | -3.593371 | -0.760120 | -2.822511 |
| C | 4.391903 | -1.779031 | 1.377081  | H  | -3.890362 | -1.583764 | -2.165120 |
| C | 3.877932 | -3.423497 | -0.353310 | H  | -4.451072 | -0.564268 | -3.474392 |
| C | 3.115780 | -2.769672 | -2.551516 | C  | -3.263748 | 0.485004  | -1.985618 |
| H | 2.808479 | -0.662128 | -2.852290 | H  | -3.634191 | 1.388332  | -2.503682 |
| C | 4.784765 | -2.796760 | 2.218004  | C  | -3.816140 | 0.428783  | -0.520123 |
| H | 4.464677 | -0.743995 | 1.693827  | C  | -5.272396 | -0.065585 | -0.577821 |
| C | 4.278715 | -4.443864 | 0.545912  | C  | -6.215385 | 0.503284  | -1.433654 |
| C | 3.498472 | -3.753676 | -1.674673 | H  | -5.930863 | 1.332040  | -2.083906 |
| H | 2.821012 | -3.021086 | -3.569697 | C  | -7.528060 | 0.040508  | -1.494492 |

|    |            |           |           |
|----|------------|-----------|-----------|
| H  | -8.228855  | 0.507718  | -2.181832 |
| C  | -7.923150  | -1.017008 | -0.672026 |
| C  | -6.994245  | -1.590994 | 0.199567  |
| H  | -7.319119  | -2.410955 | 0.837145  |
| C  | -5.690227  | -1.119342 | 0.240121  |
| H  | -4.965376  | -1.566752 | 0.916726  |
| O  | -9.178139  | -1.551913 | -0.648859 |
| C  | -10.130994 | -0.976683 | -1.511677 |
| H  | -10.296326 | 0.087005  | -1.284354 |
| H  | -9.834072  | -1.069227 | -2.567128 |
| H  | -11.059514 | -1.528056 | -1.349087 |
| C  | -3.831523  | 1.816611  | 0.150940  |
| C  | -3.485349  | 1.917247  | 1.505007  |
| C  | -4.226856  | 2.986474  | -0.499614 |
| C  | -3.524336  | 3.132566  | 2.171156  |
| H  | -3.165148  | 1.019273  | 2.030313  |
| C  | -4.263585  | 4.218844  | 0.151362  |
| H  | -4.513082  | 2.964415  | -1.551040 |
| C  | -3.910958  | 4.295794  | 1.499934  |
| H  | -3.250710  | 3.207732  | 3.222550  |
| H  | -4.567631  | 5.105009  | -0.400166 |
| O  | -3.911835  | 5.441972  | 2.238448  |
| C  | -4.319875  | 6.621725  | 1.586061  |
| H  | -5.350892  | 6.543109  | 1.210349  |
| H  | -4.268199  | 7.414868  | 2.334880  |
| H  | -3.656112  | 6.874087  | 0.745651  |
| Zn | 1.685124   | 0.493318  | 1.514977  |
| C  | 1.067812   | 1.640523  | 3.082540  |
| H  | 2.097795   | 2.022279  | 3.192065  |
| H  | 0.802357   | 1.333314  | 4.101799  |
| C  | 0.142492   | 2.726995  | 2.557578  |
| H  | 0.007842   | 3.553477  | 3.272121  |
| H  | 0.533994   | 3.168616  | 1.629806  |
| H  | -0.854085  | 2.333311  | 2.323245  |
| Si | 0.113161   | -0.720774 | 2.955355  |
| H  | 1.404968   | -1.166822 | 2.175780  |
| O  | -1.268092  | 0.093521  | 3.410400  |
| O  | -0.711764  | -1.670347 | 1.792198  |
| O  | 0.553853   | -1.420596 | 4.390272  |
| C  | 1.796047   | -2.044924 | 4.631272  |
| H  | 2.361199   | -1.464806 | 5.371761  |
| H  | 1.619913   | -3.050002 | 5.034234  |
| H  | 2.407440   | -2.137254 | 3.719676  |
| C  | -1.909325  | -2.328929 | 2.244144  |

|   |           |           |          |
|---|-----------|-----------|----------|
| H | -1.995863 | -3.259919 | 1.674562 |
| H | -1.824080 | -2.575624 | 3.309597 |
| H | -2.780965 | -1.691686 | 2.076894 |
| C | -1.504473 | 0.746125  | 4.633549 |
| H | -1.310318 | 1.825631  | 4.549849 |
| H | -2.563422 | 0.609703  | 4.886697 |
| H | -0.892751 | 0.333393  | 5.446966 |

### EtSi(OMe)<sub>3</sub>

M06L SCF energy in Solvent: -713.844842 a.u.

PBE0-D3BJ Free energy in Solvent: -713.689032 a.u.

|    |           |           |           |
|----|-----------|-----------|-----------|
| Si | 0.016200  | -0.014079 | 0.023959  |
| O  | 0.721933  | -1.256195 | -0.795915 |
| O  | -0.661178 | 0.993994  | -1.093100 |
| O  | 1.129573  | 0.915203  | 0.832612  |
| C  | 1.655986  | -1.020543 | -1.830173 |
| H  | 2.008774  | -1.990064 | -2.196863 |
| H  | 1.198493  | -0.472110 | -2.664020 |
| H  | 2.523240  | -0.446815 | -1.470844 |
| C  | -1.223949 | 2.233525  | -0.725388 |
| H  | -0.480413 | 2.892720  | -0.256987 |
| H  | -1.603032 | 2.718462  | -1.631059 |
| H  | -2.067206 | 2.108151  | -0.027237 |
| C  | 1.933063  | 0.364176  | 1.851005  |
| H  | 2.653695  | 1.124393  | 2.170437  |
| H  | 1.337104  | 0.068145  | 2.728415  |
| H  | 2.492839  | -0.517212 | 1.502237  |
| C  | -1.227559 | -0.782622 | 1.176498  |
| H  | -1.611104 | -0.004695 | 1.853185  |
| H  | -0.707780 | -1.502529 | 1.825121  |
| C  | -2.379793 | -1.470508 | 0.449082  |
| H  | -3.097000 | -1.918790 | 1.147167  |
| H  | -2.931242 | -0.763154 | -0.182364 |
| H  | -2.012295 | -2.267585 | -0.207530 |

### IM2

M06L SCF energy in Solvent: -6477.886404 a.u.

PBE0-D3BJ Free energy in Solvent: -6477.043649 a.u.

|   |           |          |           |
|---|-----------|----------|-----------|
| O | -0.528600 | 0.217614 | -0.129542 |
| C | -1.012928 | 1.060423 | 0.817987  |
| C | -2.411285 | 1.256504 | 0.958295  |
| C | -2.861032 | 2.087285 | 1.984394  |
| H | -3.935698 | 2.217113 | 2.108476  |
| C | -2.007799 | 2.744165 | 2.872498  |

|   |           |           |           |    |           |           |           |
|---|-----------|-----------|-----------|----|-----------|-----------|-----------|
| C | -0.642650 | 2.544167  | 2.705128  | Si | -0.403123 | -3.460813 | -0.127916 |
| H | 0.061682  | 3.042769  | 3.375340  | O  | 1.025100  | -2.639800 | -0.497332 |
| C | -0.130988 | 1.731285  | 1.693095  | O  | -0.006763 | -4.315411 | 1.212303  |
| C | -2.549009 | 3.637282  | 3.947081  | O  | -0.840727 | -4.541105 | -1.281577 |
| H | -2.940938 | 4.576751  | 3.534369  | C  | 2.211061  | -3.399340 | -0.813554 |
| H | -1.777367 | 3.901423  | 4.679347  | H  | 2.038495  | -3.967485 | -1.733963 |
| H | -3.377345 | 3.166383  | 4.490992  | H  | 3.020775  | -2.678542 | -0.952291 |
| C | -3.426743 | 0.497650  | 0.071888  | H  | 2.438436  | -4.085615 | 0.009959  |
| O | -3.075874 | 0.575350  | -1.292014 | C  | -1.499566 | -4.126075 | -2.470471 |
| C | -4.828680 | 1.138372  | 0.177041  | H  | -0.779132 | -3.713585 | -3.188799 |
| C | -5.061104 | 2.445135  | -0.370464 | H  | -1.989627 | -5.002564 | -2.905002 |
| C | -5.877091 | 0.481149  | 0.789230  | H  | -2.267341 | -3.363423 | -2.268510 |
| C | -4.043147 | 3.240962  | -0.959691 | C  | -0.646314 | -5.496982 | 1.652177  |
| C | -6.379127 | 3.007008  | -0.289926 | H  | -1.198932 | -5.293497 | 2.578299  |
| C | -7.171162 | 1.037291  | 0.863867  | H  | -1.341935 | -5.897211 | 0.902620  |
| H | -5.712283 | -0.499036 | 1.231217  | H  | 0.120027  | -6.252846 | 1.857209  |
| C | -4.312376 | 4.496911  | -1.451913 | Zn | 1.240193  | -0.554433 | -0.217628 |
| H | -3.039558 | 2.835965  | -1.030568 | O  | 3.011232  | -0.447561 | -0.849202 |
| C | -6.622939 | 4.298394  | -0.817908 | N  | 1.896469  | 0.274985  | 1.610650  |
| C | -7.420277 | 2.273178  | 0.327369  | C  | 1.358810  | 1.650267  | 1.533629  |
| H | -7.966638 | 0.474712  | 1.349878  | H  | 1.661042  | 2.059446  | 0.561113  |
| C | -5.613982 | 5.033430  | -1.389998 | H  | 1.853776  | 2.273657  | 2.300218  |
| H | -3.508856 | 5.081413  | -1.897637 | C  | 1.550563  | -0.424641 | 2.856876  |
| H | -7.634627 | 4.700030  | -0.751392 | H  | 1.824818  | 0.206143  | 3.723341  |
| H | -8.415617 | 2.715809  | 0.375140  | H  | 0.467423  | -0.596680 | 2.901246  |
| H | -5.814500 | 6.026502  | -1.789406 | C  | 2.389573  | -1.687855 | 2.784934  |
| C | -3.478538 | -0.981254 | 0.543679  | H  | 1.846415  | -2.465749 | 2.231568  |
| C | -4.042252 | -2.009475 | -0.290289 | H  | 2.601979  | -2.096283 | 3.778209  |
| C | -2.989939 | -1.341711 | 1.787315  | C  | 3.654968  | -1.255352 | 2.026179  |
| C | -4.681825 | -1.752844 | -1.536554 | H  | 3.879915  | -1.936042 | 1.195746  |
| C | -4.007321 | -3.373393 | 0.163590  | H  | 4.542560  | -1.244319 | 2.666903  |
| C | -2.976240 | -2.676987 | 2.236333  | C  | 3.371968  | 0.152773  | 1.470831  |
| H | -2.588551 | -0.571475 | 2.442493  | H  | 3.839486  | 0.925822  | 2.106607  |
| C | -5.208850 | -2.775542 | -2.292964 | C  | 3.830949  | 0.320039  | -0.024149 |
| H | -4.748380 | -0.727803 | -1.884463 | C  | 5.273889  | -0.188549 | -0.155946 |
| C | -4.544332 | -4.401185 | -0.651280 | C  | 6.260125  | 0.065336  | 0.796761  |
| C | -3.461122 | -3.678728 | 1.433436  | H  | 6.019161  | 0.624226  | 1.702098  |
| H | -2.568375 | -2.906100 | 3.220611  | C  | 7.568324  | -0.391616 | 0.640825  |
| C | -5.131322 | -4.114509 | -1.859042 | H  | 8.304054  | -0.181488 | 1.413043  |
| H | -5.698373 | -2.542912 | -3.237353 | C  | 7.912307  | -1.116633 | -0.501417 |
| H | -4.490188 | -5.428249 | -0.287596 | C  | 6.938095  | -1.370596 | -1.471095 |
| H | -3.462754 | -4.716912 | 1.766233  | H  | 7.223103  | -1.933597 | -2.357394 |
| H | -5.545317 | -4.912744 | -2.473320 | C  | 5.642375  | -0.911998 | -1.295739 |
| H | -1.345576 | -2.356535 | 0.000766  | H  | 4.883675  | -1.107807 | -2.049665 |

|    |           |           |           |   |          |           |           |
|----|-----------|-----------|-----------|---|----------|-----------|-----------|
| O  | 9.156071  | -1.614386 | -0.756659 | C | 3.447835 | 3.439362  | 0.791221  |
| C  | 10.153281 | -1.357329 | 0.204372  | C | 5.833759 | 3.666841  | 0.333374  |
| H  | 10.323487 | -0.278324 | 0.334914  | C | 7.068690 | 1.951226  | -0.837841 |
| H  | 9.899013  | -1.794723 | 1.181408  | H | 5.947714 | 0.213623  | -1.432447 |
| H  | 11.066031 | -1.823369 | -0.172739 | C | 3.444749 | 4.679310  | 1.386501  |
| C  | 3.812131  | 1.796466  | -0.461000 | H | 2.528685 | 2.865302  | 0.742835  |
| C  | 3.181982  | 2.157358  | -1.657767 | C | 5.796402 | 4.936734  | 0.960214  |
| C  | 4.418908  | 2.810096  | 0.281306  | C | 7.041228 | 3.170934  | -0.214925 |
| C  | 3.136552  | 3.477047  | -2.080834 | H | 7.994484 | 1.568866  | -1.264938 |
| H  | 2.720147  | 1.374533  | -2.255636 | C | 4.628348 | 5.438321  | 1.479755  |
| C  | 4.381040  | 4.142590  | -0.124665 | H | 2.515141 | 5.076204  | 1.791544  |
| H  | 4.943138  | 2.571706  | 1.207658  | H | 6.721495 | 5.511564  | 1.015268  |
| C  | 3.732204  | 4.482661  | -1.314287 | H | 7.941220 | 3.781323  | -0.136130 |
| H  | 2.642118  | 3.755537  | -3.009251 | H | 4.613802 | 6.416863  | 1.957642  |
| H  | 4.861635  | 4.901106  | 0.488043  | C | 3.775499 | -0.688621 | -1.009346 |
| O  | 3.632773  | 5.749171  | -1.807060 | C | 4.403083 | -1.687073 | -0.184822 |
| C  | 4.243917  | 6.776395  | -1.061179 | C | 3.497534 | -1.003148 | -2.325909 |
| H  | 5.327546  | 6.616181  | -0.960753 | C | 4.875165 | -1.442541 | 1.136177  |
| H  | 4.065745  | 7.699813  | -1.615973 | C | 4.606017 | -3.003828 | -0.725077 |
| H  | 3.804948  | 6.867523  | -0.056524 | C | 3.747651 | -2.281560 | -2.865142 |
| Zn | -1.574868 | -0.330611 | -1.849117 | H | 3.046652 | -0.245248 | -2.964034 |
| H  | -0.608230 | -1.087002 | -2.777474 | C | 5.456696 | -2.443311 | 1.882190  |

## TS2

M06L SCF energy in Solvent: -7191.695969 a.u.

PBE0-D3BJ Free energy in Solvent: -7190.666131 a.u.

|   |           |          |           |    |           |           |           |
|---|-----------|----------|-----------|----|-----------|-----------|-----------|
| O | 0.424213  | 0.174895 | -0.368532 | C  | 5.599478  | -3.746741 | 1.364507  |
| C | 0.937673  | 1.143459 | -1.193948 | H  | 5.811839  | -2.221613 | 2.887283  |
| C | 2.334946  | 1.372778 | -1.331392 | H  | 5.315219  | -5.008311 | -0.349268 |
| C | 2.756989  | 2.278505 | -2.309450 | H  | 4.436311  | -4.277353 | -2.465853 |
| H | 3.830128  | 2.426210 | -2.430814 | H  | 6.051690  | -4.529342 | 1.971802  |
| C | 1.894906  | 3.013099 | -3.119256 | H  | 1.834852  | -2.418727 | -0.580309 |
| C | 0.535062  | 2.848397 | -2.889728 | Si | 0.667042  | -2.791071 | -1.372800 |
| H | -0.185628 | 3.442566 | -3.456471 | O  | -0.704513 | -2.510314 | -0.434347 |
| C | 0.047434  | 1.951632 | -1.939885 | O  | 0.356145  | -1.878342 | -2.693798 |
| C | 2.415660  | 3.950069 | -4.166011 | O  | 0.724769  | -4.374954 | -1.810878 |
| H | 2.766518  | 3.413770 | -5.058842 | C  | -1.518195 | -3.541651 | 0.154069  |
| H | 3.266300  | 4.536404 | -3.798203 | H  | -1.136684 | -3.786860 | 1.153745  |
| H | 1.643361  | 4.654018 | -4.496893 | H  | -2.532634 | -3.140095 | 0.235665  |
| C | 3.424963  | 0.708751 | -0.442448 | H  | -1.516749 | -4.426163 | -0.491685 |
| O | 3.011573  | 0.615946 | 0.888016  | C  | 1.524032  | -5.340485 | -1.153389 |
| C | 4.692105  | 1.598816 | -0.396039 | H  | 0.920641  | -5.904546 | -0.429001 |
| C | 4.636008  | 2.881468 | 0.248584  | H  | 1.913556  | -6.036734 | -1.903952 |
| C | 5.893383  | 1.175862 | -0.927433 | H  | 2.375551  | -4.884226 | -0.626122 |





|   |           |           |           |
|---|-----------|-----------|-----------|
| H | 2.143467  | -1.037623 | -1.421487 |
| H | 2.429786  | 0.701805  | -1.137168 |
| H | 3.566067  | -0.509339 | -0.493219 |
| O | -0.032888 | 1.494212  | 0.123126  |
| C | -1.257313 | 1.993488  | -0.351458 |
| H | -1.636049 | 1.417322  | -1.210915 |
| H | -2.034904 | 1.994911  | 0.428566  |
| H | -1.103908 | 3.027870  | -0.677554 |
| C | -2.276503 | -1.388303 | -0.067408 |
| H | -2.806688 | -2.116374 | -0.693225 |
| H | -2.376875 | -1.721709 | 0.972991  |
| H | -2.820346 | -0.438784 | -0.151651 |
| H | -0.156097 | -0.261596 | 2.034670  |

### IM3

M06L SCF energy in Solvent: -6592.370096 a.u.

PBE0-D3BJ Free energy in Solvent: -6591.496593 a.u.

|   |           |           |           |
|---|-----------|-----------|-----------|
| O | -0.517934 | -0.241760 | 0.288195  |
| C | -1.008062 | 0.625705  | 1.195616  |
| C | -2.394566 | 0.930370  | 1.218725  |
| C | -2.874477 | 1.704913  | 2.275332  |
| H | -3.942412 | 1.917688  | 2.322450  |
| C | -2.047690 | 2.235798  | 3.267677  |
| C | -0.677482 | 2.022074  | 3.142868  |
| H | 0.005824  | 2.487600  | 3.857423  |
| C | -0.137419 | 1.252054  | 2.113228  |
| C | -2.618361 | 3.032291  | 4.401994  |
| H | -3.133838 | 2.394795  | 5.133986  |
| H | -3.355075 | 3.766866  | 4.053455  |
| H | -1.836824 | 3.577067  | 4.944235  |
| C | -3.342803 | 0.457281  | 0.084028  |
| O | -2.787242 | 0.767631  | -1.196853 |
| C | -4.680180 | 1.228457  | 0.127320  |
| C | -4.727152 | 2.629256  | -0.188013 |
| C | -5.855138 | 0.586579  | 0.465652  |
| C | -3.578402 | 3.410617  | -0.482384 |
| C | -5.996892 | 3.298428  | -0.171007 |
| C | -7.098466 | 1.250317  | 0.481329  |
| H | -5.834554 | -0.467909 | 0.729156  |
| C | -3.678982 | 4.754696  | -0.759174 |
| H | -2.607038 | 2.927789  | -0.493083 |
| C | -6.064368 | 4.680632  | -0.472489 |
| C | -7.170301 | 2.579844  | 0.159748  |
| H | -7.996089 | 0.694639  | 0.747331  |

|    |           |           |           |
|----|-----------|-----------|-----------|
| C  | -4.931648 | 5.399988  | -0.763507 |
| H  | -2.777696 | 5.324563  | -0.979863 |
| H  | -7.042212 | 5.163272  | -0.460396 |
| H  | -8.124035 | 3.108349  | 0.161849  |
| H  | -4.997498 | 6.463052  | -0.990419 |
| C  | -3.607092 | -1.060014 | 0.203671  |
| C  | -4.089429 | -1.831873 | -0.913093 |
| C  | -3.426057 | -1.698421 | 1.414350  |
| C  | -4.466017 | -1.270178 | -2.166332 |
| C  | -4.250499 | -3.251527 | -0.756546 |
| C  | -3.643556 | -3.081782 | 1.576314  |
| H  | -3.077485 | -1.122953 | 2.269543  |
| C  | -4.898200 | -2.063219 | -3.205843 |
| H  | -4.412179 | -0.194707 | -2.291834 |
| C  | -4.676025 | -4.037293 | -1.855656 |
| C  | -4.017459 | -3.851592 | 0.504970  |
| H  | -3.484434 | -3.535728 | 2.553327  |
| C  | -4.985094 | -3.461958 | -3.063907 |
| H  | -5.186259 | -1.598000 | -4.147326 |
| H  | -4.774233 | -5.114312 | -1.710698 |
| H  | -4.166301 | -4.927097 | 0.610073  |
| H  | -5.317368 | -4.077103 | -3.898489 |
| H  | -1.462307 | -2.747297 | -0.441027 |
| Si | -0.513331 | -3.372765 | 0.483329  |
| O  | 1.060380  | -2.956016 | 0.034601  |
| O  | -0.630898 | -2.864585 | 2.032243  |
| O  | -0.651570 | -5.012600 | 0.406835  |
| C  | 1.711438  | -3.641824 | -1.043245 |
| H  | 1.108913  | -3.593677 | -1.960267 |
| H  | 2.666721  | -3.135441 | -1.211141 |
| H  | 1.879126  | -4.687232 | -0.762248 |
| C  | -1.290787 | -5.678774 | -0.663826 |
| H  | -0.543263 | -6.173173 | -1.298232 |
| H  | -1.963312 | -6.442823 | -0.256669 |
| H  | -1.886570 | -4.993645 | -1.286876 |
| C  | -0.501023 | -3.710401 | 3.156746  |
| H  | -1.008194 | -4.671898 | 3.002665  |
| H  | 0.556887  | -3.904488 | 3.384039  |
| H  | -0.954985 | -3.198947 | 4.012704  |
| Zn | 1.348482  | -0.821198 | -0.194770 |
| O  | 3.172139  | -0.757434 | -0.728334 |
| N  | 2.018722  | -0.025413 | 1.745553  |
| C  | 1.353670  | 1.282108  | 1.900010  |
| H  | 1.566883  | 1.868680  | 0.998699  |

|    |           |           |           |
|----|-----------|-----------|-----------|
| H  | 1.827860  | 1.824644  | 2.740946  |
| C  | 1.827914  | -0.856047 | 2.945338  |
| H  | 2.068072  | -0.255180 | 3.844679  |
| H  | 0.781172  | -1.170546 | 3.014182  |
| C  | 2.820649  | -1.981370 | 2.755608  |
| H  | 2.391972  | -2.734794 | 2.083817  |
| H  | 3.074840  | -2.478177 | 3.698690  |
| C  | 4.020167  | -1.294894 | 2.091361  |
| H  | 4.440275  | -1.906780 | 1.285749  |
| H  | 4.828190  | -1.109972 | 2.808608  |
| C  | 3.495478  | 0.039770  | 1.525622  |
| H  | 3.885880  | 0.893865  | 2.108568  |
| C  | 3.844709  | 0.211342  | 0.003353  |
| C  | 5.354340  | 0.034756  | -0.200164 |
| C  | 6.312972  | 0.418480  | 0.736259  |
| H  | 6.005898  | 0.835565  | 1.696313  |
| C  | 7.679206  | 0.264970  | 0.495481  |
| H  | 8.393719  | 0.565968  | 1.257716  |
| C  | 8.106436  | -0.278966 | -0.715983 |
| C  | 7.157654  | -0.663116 | -1.669523 |
| H  | 7.509030  | -1.087043 | -2.608193 |
| C  | 5.806895  | -0.506873 | -1.409279 |
| H  | 5.064174  | -0.817276 | -2.140921 |
| O  | 9.412306  | -0.481553 | -1.056344 |
| C  | 10.381155 | -0.116756 | -0.101916 |
| H  | 10.343574 | 0.958873  | 0.126681  |
| H  | 10.260757 | -0.679930 | 0.835706  |
| H  | 11.349918 | -0.356973 | -0.545118 |
| C  | 3.467001  | 1.628314  | -0.471155 |
| C  | 2.550901  | 1.807172  | -1.513386 |
| C  | 3.990631  | 2.774703  | 0.128585  |
| C  | 2.140290  | 3.072015  | -1.912208 |
| H  | 2.161278  | 0.927508  | -2.022036 |
| C  | 3.594961  | 4.052814  | -0.256698 |
| H  | 4.731670  | 2.676855  | 0.923310  |
| C  | 2.654679  | 4.206863  | -1.280253 |
| H  | 1.424946  | 3.205492  | -2.722039 |
| H  | 4.025331  | 4.918766  | 0.240370  |
| O  | 2.194335  | 5.406270  | -1.733301 |
| C  | 2.713570  | 6.564014  | -1.119991 |
| H  | 3.802481  | 6.641852  | -1.255068 |
| H  | 2.227815  | 7.409403  | -1.611388 |
| H  | 2.487423  | 6.590631  | -0.043895 |
| Zn | -1.299604 | -0.217640 | -1.568607 |

|   |          |           |           |
|---|----------|-----------|-----------|
| O | 0.294818 | -1.007316 | -2.095484 |
| C | 0.908633 | -0.980987 | -3.361474 |
| H | 1.979386 | -1.202244 | -3.242953 |
| H | 0.826062 | 0.002140  | -3.852228 |
| H | 0.468335 | -1.732483 | -4.035278 |

#### IM4

M06L SCF energy in Solvent: -6592.370179 a.u.

PBE0-D3BJ Free energy in Solvent: -6591.496804 a.u.

|   |          |           |           |
|---|----------|-----------|-----------|
| O | 0.625534 | 0.449861  | 0.051628  |
| C | 1.201884 | 1.420311  | -0.688292 |
| C | 2.604134 | 1.461670  | -0.903570 |
| C | 3.115008 | 2.516875  | -1.659899 |
| H | 4.188772 | 2.552837  | -1.843172 |
| C | 2.314638 | 3.511496  | -2.228438 |
| C | 0.935723 | 3.392075  | -2.074032 |
| H | 0.273130 | 4.111895  | -2.560732 |
| C | 0.369225 | 2.364926  | -1.321583 |
| C | 2.922562 | 4.648431  | -2.992106 |
| H | 3.253015 | 5.455639  | -2.323624 |
| H | 2.209834 | 5.090463  | -3.698366 |
| H | 3.805380 | 4.331884  | -3.560455 |
| C | 3.505756 | 0.275288  | -0.484185 |
| O | 3.312631 | -0.062407 | 0.879151  |
| C | 4.998786 | 0.617169  | -0.643965 |
| C | 5.615897 | 1.571325  | 0.232295  |
| C | 5.770657 | 0.015370  | -1.617722 |
| C | 4.904537 | 2.302951  | 1.219967  |
| C | 7.018417 | 1.839558  | 0.086577  |
| C | 7.148695 | 0.279503  | -1.754097 |
| H | 5.312123 | -0.691287 | -2.305879 |
| C | 5.539075 | 3.227253  | 2.017289  |
| H | 3.843528 | 2.114384  | 1.345396  |
| C | 7.640911 | 2.786866  | 0.935074  |
| C | 7.763925 | 1.167775  | -0.912099 |
| H | 7.715110 | -0.229709 | -2.532072 |
| C | 6.920651 | 3.470725  | 1.883455  |
| H | 4.965638 | 3.775900  | 2.763137  |
| H | 8.708969 | 2.967744  | 0.810024  |
| H | 8.829329 | 1.381432  | -1.002252 |
| H | 7.410467 | 4.201001  | 2.525846  |
| C | 3.132989 | -0.945965 | -1.377748 |
| C | 3.510638 | -2.286424 | -1.004561 |
| C | 2.434304 | -0.771860 | -2.559242 |

|    |           |           |           |    |            |           |           |
|----|-----------|-----------|-----------|----|------------|-----------|-----------|
| C  | 4.319872  | -2.595356 | 0.127353  | H  | -10.097619 | 0.166018  | -1.801529 |
| C  | 3.097801  | -3.383752 | -1.838185 | H  | -9.579870  | -0.747649 | -3.248379 |
| C  | 2.034160  | -1.850854 | -3.372699 | H  | -10.870034 | -1.398117 | -2.195929 |
| H  | 2.192268  | 0.238922  | -2.880935 | C  | -3.769533  | 1.437190  | 0.419504  |
| C  | 4.644993  | -3.896622 | 0.438956  | C  | -3.478932  | 1.193684  | 1.768095  |
| H  | 4.682800  | -1.781396 | 0.745278  | C  | -4.167267  | 2.729903  | 0.072599  |
| C  | 3.448297  | -4.708619 | -1.480195 | C  | -3.550369  | 2.201217  | 2.718447  |
| C  | 2.350760  | -3.136356 | -3.014254 | H  | -3.197939  | 0.184410  | 2.062010  |
| H  | 1.474772  | -1.651309 | -4.286369 | C  | -4.237657  | 3.757506  | 1.010750  |
| C  | 4.197512  | -4.968096 | -0.359218 | H  | -4.421798  | 2.968208  | -0.960167 |
| H  | 5.269186  | -4.096719 | 1.308380  | C  | -3.923337  | 3.495220  | 2.346080  |
| H  | 3.113672  | -5.521590 | -2.125026 | H  | -3.326618  | 2.008008  | 3.765762  |
| H  | 2.045530  | -3.983665 | -3.628414 | H  | -4.539578  | 4.752021  | 0.692149  |
| H  | 4.459700  | -5.991588 | -0.097294 | O  | -3.956957  | 4.421508  | 3.345250  |
| Zn | -1.106157 | -0.472882 | -0.212483 | C  | -4.330402  | 5.732197  | 2.987241  |
| O  | -2.953240 | -0.784824 | -0.074307 | H  | -5.349372  | 5.766288  | 2.574221  |
| N  | -1.572770 | 0.913973  | -1.824428 | H  | -4.295001  | 6.319416  | 3.907047  |
| C  | -1.122947 | 2.211186  | -1.256441 | H  | -3.636145  | 6.165606  | 2.252166  |
| H  | -1.484121 | 2.260554  | -0.220440 | O  | -0.028735  | -2.051521 | 0.662208  |
| H  | -1.614507 | 3.036275  | -1.803355 | Si | -0.620792  | -1.941234 | 2.599230  |
| C  | -1.032712 | 0.651796  | -3.167824 | H  | -1.133496  | -0.639312 | 2.098881  |
| H  | -1.245933 | 1.511124  | -3.831880 | O  | -1.242358  | -3.448294 | 2.335696  |
| H  | 0.054106  | 0.528559  | -3.119307 | C  | -2.003686  | -4.165278 | 3.287417  |
| C  | -1.787799 | -0.586205 | -3.596260 | H  | -2.321107  | -5.099054 | 2.810440  |
| H  | -1.326620 | -1.472934 | -3.134836 | H  | -1.415341  | -4.402250 | 4.182387  |
| H  | -1.766476 | -0.740432 | -4.680360 | H  | -2.890915  | -3.604184 | 3.602454  |
| C  | -3.194275 | -0.358690 | -3.035237 | O  | -1.104338  | -1.762875 | 4.212036  |
| H  | -3.611967 | -1.274769 | -2.604998 | C  | -1.164161  | -0.498218 | 4.813023  |
| H  | -3.892173 | -0.021632 | -3.809775 | H  | -0.381732  | -0.390709 | 5.580298  |
| C  | -3.047118 | 0.724588  | -1.946177 | H  | -1.037100  | 0.324160  | 4.086560  |
| H  | -3.482011 | 1.678133  | -2.292437 | H  | -2.139398  | -0.366236 | 5.301504  |
| C  | -3.691796 | 0.277480  | -0.591980 | C  | 0.085066   | -3.297930 | -0.029263 |
| C  | -5.128346 | -0.190719 | -0.862482 | H  | 0.469753   | -3.112504 | -1.040482 |
| C  | -6.015441 | 0.538860  | -1.653199 | H  | -0.896509  | -3.778485 | -0.080857 |
| H  | -5.692153 | 1.467736  | -2.125639 | Zn | 1.700908   | -0.964711 | 1.040584  |
| C  | -7.324766 | 0.113888  | -1.871518 | O  | 1.107628   | -1.818417 | 2.795705  |
| H  | -7.981938 | 0.708847  | -2.500494 | C  | 1.764119   | -1.639039 | 4.050129  |
| C  | -7.770509 | -1.069034 | -1.278684 | H  | 1.772216   | -0.579524 | 4.333108  |
| C  | -6.893935 | -1.809439 | -0.480318 | H  | 1.253703   | -2.217571 | 4.824830  |
| H  | -7.257485 | -2.730377 | -0.028677 | H  | 2.794989   | -1.987858 | 3.937890  |
| C  | -5.593290 | -1.373733 | -0.279771 | H  | 0.776855   | -3.965082 | 0.500601  |
| H  | -4.905219 | -1.951016 | 0.332701  |    |            |           |           |
| O  | -9.027841 | -1.579782 | -1.419461 |    |            |           |           |
| C  | -9.930272 | -0.841972 | -2.209582 |    |            |           |           |

**TS3**

M06L SCF energy in Solvent: -6592.362851 a.u.

PBE0-D3BJ Free energy in Solvent: -6591.486074 a.u.

|   |          |           |           |    |            |           |           |
|---|----------|-----------|-----------|----|------------|-----------|-----------|
| O | 0.574832 | 0.473174  | 0.028139  | H  | 1.517621   | -1.551974 | -4.247720 |
| C | 1.153464 | 1.501255  | -0.640197 | C  | 4.414670   | -4.800892 | -0.391187 |
| C | 2.556666 | 1.566994  | -0.824145 | H  | 5.505259   | -3.897054 | 1.247551  |
| C | 3.070554 | 2.657203  | -1.526594 | H  | 3.295271   | -5.387460 | -2.124126 |
| H | 4.146432 | 2.709615  | -1.690176 | H  | 2.162218   | -3.870204 | -3.611450 |
| C | 2.271091 | 3.670607  | -2.060841 | H  | 4.734616   | -5.813723 | -0.151995 |
| C | 0.892643 | 3.544268  | -1.915192 | Zn | -1.166456  | -0.392788 | -0.283001 |
| H | 0.231287 | 4.290017  | -2.362550 | O  | -3.004567  | -0.784336 | -0.185932 |
| C | 0.321468 | 2.480946  | -1.217318 | N  | -1.663022  | 1.100812  | -1.763329 |
| C | 2.881310 | 4.839395  | -2.772866 | C  | -1.173372  | 2.356748  | -1.142479 |
| H | 3.245534 | 5.598466  | -2.066894 | H  | -1.517511  | 2.365562  | -0.100243 |
| H | 2.159303 | 5.334840  | -3.432497 | H  | -1.648852  | 3.218889  | -1.644222 |
| H | 3.742589 | 4.540748  | -3.382541 | C  | -1.142717  | 0.882161  | -3.123325 |
| C | 3.466328 | 0.387860  | -0.406597 | H  | -1.321194  | 1.779068  | -3.746098 |
| O | 3.250319 | 0.024267  | 0.946055  | H  | -0.061147  | 0.709109  | -3.089358 |
| C | 4.954429 | 0.770482  | -0.521966 | C  | -1.956441  | -0.297873 | -3.601051 |
| C | 5.527759 | 1.710392  | 0.398648  | H  | -1.564475  | -1.222154 | -3.149220 |
| C | 5.758470 | 0.230672  | -1.505649 | H  | -1.923385  | -0.427043 | -4.687965 |
| C | 4.777561 | 2.390306  | 1.394550  | C  | -3.354398  | 0.004105  | -3.061036 |
| C | 6.924955 | 2.020832  | 0.291318  | H  | -3.881836  | -0.905082 | -2.757557 |
| C | 7.129964 | 0.540757  | -1.608065 | H  | -3.971621  | 0.495925  | -3.822210 |
| H | 5.330624 | -0.462837 | -2.226640 | C  | -3.147687  | 0.945200  | -1.855963 |
| C | 5.371678 | 3.298732  | 2.239603  | H  | -3.578781  | 1.940846  | -2.056891 |
| H | 3.719314 | 2.172119  | 1.488318  | C  | -3.739590  | 0.346692  | -0.531142 |
| C | 7.505786 | 2.949964  | 1.188846  | C  | -5.202694  | -0.049422 | -0.751120 |
| C | 7.705874 | 1.410331  | -0.719066 | C  | -6.084170  | 0.691977  | -1.536727 |
| H | 7.724026 | 0.079406  | -2.395250 | H  | -5.734533  | 1.575322  | -2.073251 |
| C | 6.749518 | 3.578740  | 2.146903  | C  | -7.424202  | 0.330979  | -1.677607 |
| H | 4.768477 | 3.805637  | 2.991408  | H  | -8.075706  | 0.931947  | -2.306707 |
| H | 8.571233 | 3.161951  | 1.093614  | C  | -7.904515  | -0.798405 | -1.013496 |
| H | 8.766258 | 1.656217  | -0.780994 | C  | -7.032604  | -1.552148 | -0.221334 |
| H | 7.207562 | 4.294717  | 2.827515  | H  | -7.423063  | -2.432162 | 0.286029  |
| C | 3.141371 | -0.823909 | -1.325796 | C  | -5.704663  | -1.179509 | -0.095848 |
| C | 3.577423 | -2.150922 | -0.976135 | H  | -5.022023  | -1.768168 | 0.512194  |
| C | 2.434333 | -0.659036 | -2.503237 | O  | -9.191173  | -1.246611 | -1.077851 |
| C | 4.432544 | -2.432610 | 0.126934  | C  | -10.088981 | -0.497724 | -1.862790 |
| C | 3.197136 | -3.253565 | -1.816660 | H  | -10.190413 | 0.533476  | -1.492889 |
| C | 2.079787 | -1.741687 | -3.333406 | H  | -9.778464  | -0.464918 | -2.917810 |
| H | 2.149056 | 0.345326  | -2.810307 | H  | -11.053497 | -1.004141 | -1.786635 |
| C | 4.841230 | -3.717579 | 0.402884  | C  | -3.706064  | 1.395177  | 0.597151  |
| H | 4.763037 | -1.609983 | 0.752056  | C  | -3.137240  | 1.073861  | 1.834525  |
| C | 3.611870 | -4.566199 | -1.480555 | C  | -4.237760  | 2.676997  | 0.444602  |
| C | 2.438969 | -3.019497 | -2.988206 | C  | -3.060828  | 2.005245  | 2.860208  |
|   |          |           |           | H  | -2.763728  | 0.062664  | 1.987513  |

|    |           |           |           |   |           |           |           |
|----|-----------|-----------|-----------|---|-----------|-----------|-----------|
| C  | -4.169690 | 3.626874  | 1.460395  | H | -0.003802 | 3.523072  | 3.363351  |
| H  | -4.725835 | 2.956007  | -0.490207 | C | -0.112146 | 1.925214  | 1.940009  |
| C  | -3.569103 | 3.293954  | 2.678279  | C | -2.645362 | 4.118039  | 3.763347  |
| H  | -2.617708 | 1.752943  | 3.822055  | H | -3.188913 | 4.888431  | 3.200750  |
| H  | -4.589584 | 4.615960  | 1.296216  | H | -1.876149 | 4.626575  | 4.355888  |
| O  | -3.445378 | 4.142269  | 3.736558  | H | -3.365654 | 3.679171  | 4.466183  |
| C  | -3.969279 | 5.441311  | 3.579457  | C | -3.326179 | 0.478667  | 0.296840  |
| H  | -5.051335 | 5.421544  | 3.383060  | O | -2.843218 | 0.310249  | -1.030760 |
| H  | -3.782848 | 5.958484  | 4.522830  | C | -4.654117 | 1.256742  | 0.177028  |
| H  | -3.470840 | 5.984359  | 2.762887  | C | -4.717693 | 2.451428  | -0.613536 |
| O  | -0.239014 | -2.199553 | 0.229354  | C | -5.781819 | 0.854826  | 0.864346  |
| Si | -0.504580 | -2.396569 | 2.027283  | C | -3.591175 | 3.026330  | -1.260982 |
| H  | -0.527010 | -0.850812 | 1.905931  | C | -5.970938 | 3.143161  | -0.723042 |
| O  | -0.686477 | -4.043601 | 1.775900  | C | -7.007882 | 1.542309  | 0.761262  |
| C  | -1.179072 | -4.947001 | 2.734984  | H | -5.733069 | -0.026622 | 1.500609  |
| H  | -1.020357 | -5.961667 | 2.349060  | C | -3.702278 | 4.186239  | -1.991311 |
| H  | -0.665243 | -4.854395 | 3.703277  | H | -2.631913 | 2.526666  | -1.175789 |
| H  | -2.250584 | -4.798389 | 2.916170  | C | -6.052242 | 4.324171  | -1.500895 |
| O  | -1.516721 | -2.351513 | 3.369120  | C | -7.106069 | 2.655419  | -0.032841 |
| C  | -1.682615 | -1.223537 | 4.185735  | H | -7.873491 | 1.176601  | 1.311364  |
| H  | -1.213034 | -1.397411 | 5.163551  | C | -4.944217 | 4.839058  | -2.126982 |
| H  | -1.230720 | -0.317082 | 3.748016  | H | -2.818164 | 4.604272  | -2.470775 |
| H  | -2.753300 | -1.034544 | 4.340327  | H | -7.018398 | 4.823697  | -1.579892 |
| C  | -0.258586 | -3.258085 | -0.733022 | H | -8.050095 | 3.192050  | -0.132123 |
| H  | -0.000389 | -2.825619 | -1.706254 | H | -5.019218 | 5.751539  | -2.716651 |
| H  | -1.254550 | -3.710302 | -0.771411 | C | -3.548365 | -0.925351 | 0.903643  |
| Zn | 1.605139  | -0.816153 | 1.147645  | C | -4.384804 | -1.882998 | 0.226808  |
| O  | 1.191939  | -2.259567 | 2.483329  | C | -2.933787 | -1.307528 | 2.081105  |
| C  | 2.032441  | -3.406982 | 2.638459  | C | -5.070225 | -1.604531 | -0.987552 |
| H  | 3.043321  | -3.055267 | 2.862062  | C | -4.577130 | -3.177416 | 0.814599  |
| H  | 1.662796  | -4.013105 | 3.472305  | C | -3.090611 | -2.598157 | 2.628435  |
| H  | 2.047658  | -4.016759 | 1.726892  | H | -2.316602 | -0.587997 | 2.615931  |
| H  | 0.474655  | -4.027240 | -0.471272 | C | -5.908978 | -2.532210 | -1.563550 |

### IM5

M06L SCF energy in Solvent: -6592.370096 a.u.

PBE0-D3BJ Free energy in Solvent: -6591.496593 a.u.

|   |           |          |          |    |           |           |           |
|---|-----------|----------|----------|----|-----------|-----------|-----------|
| O | -0.437156 | 0.055470 | 0.479741 | H  | -2.576564 | -2.851398 | 3.555452  |
| C | -0.957129 | 1.086931 | 1.179522 | C  | -6.101220 | -3.798331 | -0.973534 |
| C | -2.356547 | 1.308631 | 1.183290 | H  | -6.425436 | -2.284138 | -2.489515 |
| C | -2.855511 | 2.290169 | 2.042179 | H  | -5.568453 | -5.088086 | 0.655644  |
| H | -3.932409 | 2.447536 | 2.081346 | H  | -4.046949 | -4.510262 | 2.433445  |
| C | -2.047356 | 3.084835 | 2.856868 | H  | -6.767200 | -4.522684 | -1.439716 |
| C | -0.673339 | 2.893421 | 2.772330 | Zn | 1.365594  | -0.678969 | 0.432019  |
|   |           |          |          | O  | 3.165389  | -0.851938 | -0.096137 |



|    |           |           |           |    |           |           |           |
|----|-----------|-----------|-----------|----|-----------|-----------|-----------|
| C  | -4.647599 | 1.254655  | 0.178985  | H  | 2.409027  | -1.945743 | 2.925143  |
| C  | -4.713583 | 2.448613  | -0.612742 | H  | 2.994125  | -1.382253 | 4.494703  |
| C  | -5.774903 | 0.851118  | 0.865999  | C  | 4.031793  | -0.514220 | 2.748613  |
| C  | -3.587783 | 3.027285  | -1.258244 | H  | 4.560623  | -1.291013 | 2.188106  |
| C  | -5.968803 | 3.136450  | -0.724804 | H  | 4.744115  | -0.092277 | 3.467418  |
| C  | -7.002793 | 1.534919  | 0.760609  | C  | 3.515666  | 0.587711  | 1.802012  |
| H  | -5.724482 | -0.029432 | 1.503350  | H  | 3.905055  | 1.578078  | 2.094937  |
| C  | -3.701405 | 4.186352  | -1.989560 | C  | 3.858281  | 0.291488  | 0.294597  |
| H  | -2.626904 | 2.531337  | -1.170313 | C  | 5.361546  | 0.040246  | 0.149058  |
| C  | -6.052703 | 4.316488  | -1.503946 | C  | 6.327175  | 0.715062  | 0.895504  |
| C  | -7.103451 | 2.646300  | -0.035571 | H  | 6.029509  | 1.429755  | 1.664097  |
| H  | -7.867980 | 1.167497  | 1.310258  | C  | 7.691351  | 0.493073  | 0.706191  |
| C  | -4.945315 | 4.834677  | -2.128402 | H  | 8.410740  | 1.035013  | 1.315033  |
| H  | -2.817656 | 4.607203  | -2.467257 | C  | 8.111150  | -0.426388 | -0.255468 |
| H  | -7.020405 | 4.812687  | -1.584989 | C  | 7.155383  | -1.115225 | -1.009502 |
| H  | -8.048991 | 3.179850  | -0.137097 | H  | 7.499943  | -1.834053 | -1.750028 |
| H  | -5.022328 | 5.746445  | -2.718945 | C  | 5.805732  | -0.881794 | -0.806086 |
| C  | -3.541714 | -0.926854 | 0.901817  | H  | 5.062080  | -1.428379 | -1.381452 |
| C  | -4.378606 | -1.880857 | 0.220910  | O  | 9.413773  | -0.724175 | -0.525533 |
| C  | -2.932399 | -1.312501 | 2.080342  | C  | 10.391969 | -0.038259 | 0.220774  |
| C  | -5.057687 | -1.599455 | -0.996267 | H  | 10.334218 | 1.049251  | 0.064770  |
| C  | -4.579281 | -3.174450 | 0.807909  | H  | 10.301680 | -0.245563 | 1.297526  |
| C  | -3.096909 | -2.602378 | 2.627079  | H  | 11.357000 | -0.403246 | -0.136713 |
| H  | -2.315012 | -0.595435 | 2.618102  | C  | 3.482039  | 1.503753  | -0.580322 |
| C  | -5.898922 | -2.523005 | -1.575386 | C  | 2.539216  | 1.382184  | -1.607941 |
| H  | -4.895075 | -0.640125 | -1.475557 | C  | 4.025681  | 2.769946  | -0.354926 |
| C  | -5.444148 | -4.103931 | 0.178784  | C  | 2.122467  | 2.481128  | -2.346924 |
| C  | -3.908270 | -3.516294 | 2.006936  | H  | 2.123327  | 0.401387  | -1.837621 |
| H  | -2.587385 | -2.857926 | 3.556063  | C  | 3.624508  | 3.884738  | -1.085451 |
| C  | -6.100194 | -3.787901 | -0.985572 | H  | 4.785080  | 2.901458  | 0.416558  |
| H  | -6.410345 | -2.272669 | -2.503558 | C  | 2.656429  | 3.745327  | -2.085130 |
| H  | -5.579766 | -5.080031 | 0.645706  | H  | 1.383754  | 2.379060  | -3.139266 |
| H  | -4.062013 | -4.509945 | 2.428837  | H  | 4.070233  | 4.852765  | -0.871258 |
| H  | -6.768284 | -4.508867 | -1.454030 | O  | 2.185868  | 4.766355  | -2.851950 |
| Zn | 1.362399  | -0.670093 | 0.416260  | C  | 2.711637  | 6.050685  | -2.602676 |
| O  | 3.163710  | -0.847906 | -0.101476 | H  | 3.796734  | 6.086947  | -2.778237 |
| N  | 2.035751  | 0.595724  | 2.019547  | H  | 2.210949  | 6.722589  | -3.302407 |
| C  | 1.386011  | 1.903646  | 1.800964  | H  | 2.507166  | 6.380200  | -1.573537 |
| H  | 1.651224  | 2.230950  | 0.789504  | O  | 0.606566  | -2.622500 | 0.216520  |
| H  | 1.833952  | 2.639505  | 2.494440  | Si | 0.140799  | -3.239427 | -1.318942 |
| C  | 1.805029  | 0.068252  | 3.373576  | H  | 0.108452  | -1.315237 | -1.712060 |
| H  | 2.019549  | 0.853233  | 4.123135  | O  | 0.045033  | -4.873416 | -1.010586 |
| H  | 0.751694  | -0.219411 | 3.489116  | C  | 1.211524  | -5.655139 | -0.887939 |
| C  | 2.797779  | -1.069262 | 3.464098  | H  | 0.915435  | -6.660512 | -0.568193 |

|    |           |           |           |
|----|-----------|-----------|-----------|
| H  | 1.746816  | -5.725403 | -1.843149 |
| H  | 1.908477  | -5.244805 | -0.139133 |
| O  | 1.312973  | -3.236501 | -2.463712 |
| C  | 2.058215  | -2.166275 | -3.009516 |
| H  | 2.724492  | -2.592006 | -3.766656 |
| H  | 1.404970  | -1.425596 | -3.490140 |
| H  | 2.657420  | -1.669218 | -2.234683 |
| C  | 0.301749  | -3.324552 | 1.424038  |
| H  | 1.211933  | -3.794122 | 1.817086  |
| H  | -0.452995 | -4.096048 | 1.245102  |
| Zn | -1.334483 | -0.760907 | -1.160622 |
| O  | -1.503206 | -2.960071 | -1.583434 |
| C  | -2.472123 | -4.016368 | -1.637673 |
| H  | -2.547336 | -4.525488 | -0.671622 |
| H  | -3.429774 | -3.554003 | -1.886679 |
| H  | -2.190726 | -4.742642 | -2.405472 |
| H  | -0.089522 | -2.601103 | 2.150320  |

**Si(OMe)<sub>4</sub>**

M06L SCF energy in Solvent: -749.774114 a.u.

PBE0-D3BJ Free energy in Solvent: -749.643705 a.u.

|    |           |           |           |
|----|-----------|-----------|-----------|
| Si | 0.000038  | -0.000417 | 0.000423  |
| O  | -0.892376 | 1.173363  | -0.720031 |
| O  | 0.895864  | -0.719757 | -1.171499 |
| O  | -0.895606 | -1.173424 | 0.718192  |
| C  | -1.727205 | 0.879464  | -1.822806 |
| H  | -2.247187 | 1.799389  | -2.108152 |
| H  | -1.144220 | 0.520518  | -2.681283 |
| H  | -2.479099 | 0.118102  | -1.567846 |
| C  | 1.734621  | -1.819000 | -0.875613 |
| H  | 1.155109  | -2.678549 | -0.513641 |
| H  | 2.254449  | -2.105122 | -1.795439 |
| H  | 2.486662  | -1.559397 | -0.115945 |
| C  | -1.737973 | -0.878254 | 1.814766  |
| H  | -2.266804 | -1.795681 | 2.091822  |
| H  | -1.159823 | -0.526937 | 2.679679  |
| H  | -2.482402 | -0.110660 | 1.556507  |
| O  | 0.892478  | 0.718604  | 1.175216  |
| C  | 1.730230  | 1.819277  | 0.881684  |
| H  | 1.149314  | 2.680085  | 0.524989  |
| H  | 2.252312  | 2.101625  | 1.801320  |
| H  | 2.480237  | 1.563264  | 0.118861  |

**IM6a**

M06L SCF energy in Solvent: -6687.273051 a.u.

PBE0-D3BJ Free energy in Solvent: -6686.277180 a.u.

|   |           |           |           |
|---|-----------|-----------|-----------|
| O | -1.121391 | -0.439057 | -0.051520 |
| C | -1.746170 | -1.536541 | -0.550090 |
| C | -3.160949 | -1.590271 | -0.695159 |
| C | -3.732952 | -2.732056 | -1.254438 |
| H | -4.813497 | -2.755715 | -1.387139 |
| C | -2.995159 | -3.841780 | -1.669583 |
| C | -1.615230 | -3.758327 | -1.546538 |
| H | -0.990401 | -4.583585 | -1.896735 |
| C | -0.985771 | -2.636907 | -1.004736 |
| C | -3.669573 | -5.055460 | -2.232059 |
| H | -4.193041 | -5.627150 | -1.453581 |
| H | -2.950350 | -5.734626 | -2.704672 |
| H | -4.423697 | -4.792128 | -2.984472 |
| C | -4.041321 | -0.390437 | -0.295160 |
| O | -3.748062 | -0.017221 | 1.030096  |
| C | -5.540921 | -0.760163 | -0.340070 |
| C | -6.102093 | -1.635372 | 0.650477  |
| C | -6.367640 | -0.271086 | -1.331879 |
| C | -5.332198 | -2.273822 | 1.659110  |
| C | -7.506436 | -1.928235 | 0.603287  |
| C | -7.746234 | -0.563544 | -1.375331 |
| H | -5.951934 | 0.370844  | -2.106279 |
| C | -5.914065 | -3.123029 | 2.571779  |
| H | -4.268667 | -2.068796 | 1.706662  |
| C | -8.073741 | -2.795887 | 1.569088  |
| C | -8.309059 | -1.366476 | -0.417951 |
| H | -8.356848 | -0.140680 | -2.171770 |
| C | -7.298447 | -3.383322 | 2.537963  |
| H | -5.294847 | -3.599031 | 3.330963  |
| H | -9.144781 | -2.995023 | 1.516956  |
| H | -9.374581 | -1.597442 | -0.433213 |
| H | -7.746547 | -4.053131 | 3.270589  |
| C | -3.758227 | 0.799992  | -1.254753 |
| C | -4.233624 | 2.123218  | -0.948272 |
| C | -3.047224 | 0.617278  | -2.425346 |
| C | -5.023217 | 2.425840  | 0.195534  |
| C | -3.936003 | 3.198575  | -1.854689 |
| C | -2.729492 | 1.679796  | -3.295214 |
| H | -2.724064 | -0.387978 | -2.688879 |
| C | -5.465699 | 3.706057  | 0.438364  |
| H | -5.258146 | 1.625790  | 0.889998  |
| C | -4.417671 | 4.501384  | -1.574408 |



|   |           |           |           |    |           |           |           |
|---|-----------|-----------|-----------|----|-----------|-----------|-----------|
| C | -3.164039 | 2.950139  | -3.015272 | C  | 3.641226  | -4.658886 | 0.741922  |
| H | -2.149916 | 1.477864  | -4.195764 | H  | 3.437534  | -3.933928 | -1.253291 |
| C | -5.160847 | 4.758240  | -0.448544 | C  | 3.730870  | -4.334901 | 2.095831  |
| H | -6.066076 | 3.905386  | 1.324451  | H  | 3.777282  | -2.751868 | 3.537939  |
| H | -4.191885 | 5.298593  | -2.284338 | H  | 3.667709  | -5.693743 | 0.410626  |
| H | -2.934887 | 3.783789  | -3.681029 | O  | 3.860179  | -5.241339 | 3.104650  |
| H | -5.523498 | 5.765268  | -0.247043 | C  | 3.895715  | -6.601852 | 2.737105  |
| O | 2.735805  | -0.028724 | -0.194289 | H  | 4.748875  | -6.821757 | 2.078682  |
| N | 1.024032  | -1.462850 | -1.813465 | H  | 4.002694  | -7.164105 | 3.666854  |
| C | 0.511160  | -2.601638 | -1.017571 | H  | 2.969184  | -6.909466 | 2.230491  |
| H | 0.930529  | -2.512200 | -0.002644 | Zn | 0.816782  | 0.029945  | -0.250849 |
| H | 0.904615  | -3.549036 | -1.428115 | Zn | -2.135882 | 0.896281  | 1.182883  |
| C | 0.388277  | -1.330617 | -3.134110 | C  | 1.442969  | 1.336932  | 2.465862  |
| H | 0.447494  | -2.297074 | -3.669174 | O  | 0.838912  | 0.389270  | 1.984519  |
| H | -0.671256 | -1.079636 | -3.024051 | O  | 2.190833  | 1.247286  | 3.559780  |
| C | 1.214881  | -0.255627 | -3.814940 | C  | 2.274847  | -0.039394 | 4.227938  |
| H | 0.793793  | 0.734103  | -3.592073 | H  | 2.082962  | -0.832279 | 3.498775  |
| H | 1.210524  | -0.367455 | -4.904202 | H  | 1.471389  | -0.056723 | 4.973862  |
| C | 2.611823  | -0.399772 | -3.192844 | C  | 3.640541  | -0.130840 | 4.850577  |
| H | 2.934179  | 0.543928  | -2.738288 | H  | 4.422743  | -0.122397 | 4.082698  |
| H | 3.381422  | -0.682268 | -3.918651 | H  | 3.729981  | -1.062019 | 5.420225  |
| C | 2.480218  | -1.465127 | -2.094777 | H  | 3.823702  | 0.704978  | 5.533644  |
| H | 2.760888  | -2.458569 | -2.492045 | C  | 1.367770  | 2.794888  | 2.006213  |
| C | 3.322115  | -1.116379 | -0.823602 | C  | 0.588326  | 2.919535  | 0.695772  |
| C | 4.736596  | -0.742649 | -1.304083 | O  | 0.560335  | 2.103077  | -0.225902 |
| C | 5.640126  | -1.694113 | -1.774603 | O  | 0.016331  | 4.102811  | 0.586727  |
| H | 5.372845  | -2.750644 | -1.761683 | C  | -0.803488 | 4.310686  | -0.595248 |
| C | 6.900575  | -1.337226 | -2.251597 | H  | -1.626627 | 3.585054  | -0.547276 |
| H | 7.576617  | -2.111708 | -2.604845 | H  | -0.200231 | 4.080358  | -1.480102 |
| C | 7.281261  | 0.006111  | -2.258147 | C  | -1.278701 | 5.733941  | -0.558160 |
| C | 6.385638  | 0.973477  | -1.793018 | H  | -1.906648 | 5.918141  | 0.319567  |
| H | 6.690693  | 2.018640  | -1.809662 | H  | -1.878947 | 5.942879  | -1.449325 |
| C | 5.134137  | 0.598038  | -1.328458 | H  | -0.434607 | 6.432159  | -0.541267 |
| H | 4.430644  | 1.349763  | -0.977768 | C  | 0.656149  | 3.541829  | 3.152525  |
| O | 8.490007  | 0.466709  | -2.691465 | H  | 1.297533  | 3.536795  | 4.037427  |
| C | 9.404980  | -0.495027 | -3.163073 | H  | -0.295479 | 3.055166  | 3.390453  |
| H | 9.667940  | -1.223495 | -2.381963 | H  | 0.432533  | 4.572049  | 2.874660  |
| H | 9.010096  | -1.039391 | -4.033744 | C  | 2.760005  | 3.384423  | 1.731045  |
| H | 10.299761 | 0.056879  | -3.458075 | C  | 2.967584  | 4.763662  | 1.827222  |
| C | 3.446946  | -2.296505 | 0.157469  | C  | 3.821821  | 2.564592  | 1.339275  |
| C | 3.552855  | -1.998573 | 1.522122  | C  | 4.220778  | 5.309494  | 1.568684  |
| C | 3.509534  | -3.641791 | -0.205314 | H  | 2.148229  | 5.423371  | 2.104510  |
| C | 3.692270  | -2.990001 | 2.478532  | C  | 5.076983  | 3.113817  | 1.089401  |
| H | 3.516842  | -0.949947 | 1.813498  | H  | 3.664069  | 1.494229  | 1.195052  |

|   |           |          |          |
|---|-----------|----------|----------|
| C | 5.282798  | 4.485210 | 1.208159 |
| H | 4.365054  | 6.385175 | 1.653436 |
| H | 5.894113  | 2.457409 | 0.793400 |
| H | 6.265711  | 4.911227 | 1.014892 |
| H | -1.491060 | 2.124688 | 1.852021 |

**TS5a**

M06L SCF energy in Solvent: -6687.264449 a.u.

PBE0-D3BJ Free energy in Solvent: -6686.270906 a.u.

|   |          |           |           |
|---|----------|-----------|-----------|
| C | 1.561791 | 1.462368  | -0.952329 |
| C | 2.976688 | 1.588247  | -0.944864 |
| C | 3.539208 | 2.715085  | -1.543134 |
| H | 4.625299 | 2.799612  | -1.568761 |
| C | 2.783402 | 3.742429  | -2.112683 |
| C | 1.400264 | 3.615118  | -2.065517 |
| H | 0.770713 | 4.404088  | -2.484386 |
| C | 0.779517 | 2.505090  | -1.492307 |
| C | 3.445758 | 4.933488  | -2.736613 |
| H | 4.075301 | 5.472895  | -2.016809 |
| H | 2.708528 | 5.644941  | -3.126175 |
| H | 4.100812 | 4.649719  | -3.571210 |
| C | 3.873316 | 0.493238  | -0.321121 |
| O | 3.393603 | 0.145235  | 0.970850  |
| C | 5.310340 | 1.017888  | -0.127058 |
| C | 5.587345 | 2.015939  | 0.866826  |
| C | 6.349460 | 0.555690  | -0.909541 |
| C | 4.585005 | 2.630121  | 1.664355  |
| C | 6.941002 | 2.460207  | 1.042838  |
| C | 7.676797 | 0.996583  | -0.733348 |
| H | 6.149395 | -0.179873 | -1.685893 |
| C | 4.901787 | 3.601901  | 2.584967  |
| H | 3.555704 | 2.310182  | 1.542659  |
| C | 7.231818 | 3.450894  | 2.012593  |
| C | 7.970081 | 1.922211  | 0.233420  |
| H | 8.462617 | 0.591981  | -1.369423 |
| C | 6.236423 | 4.013979  | 2.772246  |
| H | 4.109250 | 4.057270  | 3.177252  |
| H | 8.269177 | 3.765165  | 2.133241  |
| H | 8.991991 | 2.270616  | 0.386275  |
| H | 6.472862 | 4.779596  | 3.509856  |
| C | 3.868250 | -0.765910 | -1.229270 |
| C | 4.402256 | -2.015244 | -0.752394 |
| C | 3.332620 | -0.724703 | -2.503416 |
| C | 5.031935 | -2.165448 | 0.514342  |

|   |           |           |           |
|---|-----------|-----------|-----------|
| C | 4.322272  | -3.174818 | -1.595092 |
| C | 3.266200  | -1.863723 | -3.330916 |
| H | 2.950231  | 0.220250  | -2.883501 |
| C | 5.513214  | -3.385510 | 0.931079  |
| H | 5.116924  | -1.298221 | 1.160094  |
| C | 4.825800  | -4.415015 | -1.130009 |
| C | 3.747119  | -3.068499 | -2.884683 |
| H | 2.830629  | -1.776505 | -4.325348 |
| C | 5.403753  | -4.526218 | 0.111036  |
| H | 5.990769  | -3.467017 | 1.906268  |
| H | 4.751304  | -5.281726 | -1.788166 |
| H | 3.701669  | -3.959110 | -3.512844 |
| H | 5.787485  | -5.485193 | 0.455463  |
| O | -2.754183 | 0.106409  | 0.060056  |
| N | -1.331383 | 1.280817  | -2.023099 |
| C | -0.718346 | 2.478099  | -1.413440 |
| H | -1.050550 | 2.509525  | -0.364544 |
| H | -1.132625 | 3.383158  | -1.894030 |
| C | -0.895941 | 1.046820  | -3.407686 |
| H | -0.987493 | 1.987504  | -3.981786 |
| H | 0.160821  | 0.756443  | -3.420737 |
| C | -1.853637 | -0.023381 | -3.920241 |
| H | -1.392834 | -1.017106 | -3.861601 |
| H | -2.108604 | 0.146038  | -4.971575 |
| C | -3.075132 | 0.068643  | -2.990039 |
| H | -3.159347 | -0.837820 | -2.375337 |
| H | -4.024362 | 0.175889  | -3.524016 |
| C | -2.813533 | 1.262129  | -2.066758 |
| H | -3.172756 | 2.194462  | -2.539994 |
| C | -3.449517 | 1.088284  | -0.641762 |
| C | -4.903090 | 0.633157  | -0.869672 |
| C | -5.897910 | 1.514585  | -1.289173 |
| H | -5.672415 | 2.575020  | -1.400590 |
| C | -7.196707 | 1.084143  | -1.557136 |
| H | -7.943333 | 1.806528  | -1.877566 |
| C | -7.521233 | -0.264583 | -1.401735 |
| C | -6.533257 | -1.163116 | -0.986785 |
| H | -6.797977 | -2.214061 | -0.879814 |
| C | -5.246783 | -0.715750 | -0.729897 |
| H | -4.474047 | -1.418198 | -0.425663 |
| O | -8.756839 | -0.795849 | -1.627124 |
| C | -9.769651 | 0.095910  | -2.031396 |
| H | -9.952036 | 0.873697  | -1.275088 |
| H | -9.526171 | 0.583404  | -2.987195 |

|    |            |           |           |
|----|------------|-----------|-----------|
| H  | -10.672167 | -0.506440 | -2.154242 |
| C  | -3.473706  | 2.395840  | 0.168904  |
| C  | -3.425679  | 2.294013  | 1.565284  |
| C  | -3.592338  | 3.675964  | -0.371747 |
| C  | -3.459188  | 3.411253  | 2.381671  |
| H  | -3.358813  | 1.296318  | 1.993517  |
| C  | -3.624778  | 4.817582  | 0.431372  |
| H  | -3.644487  | 3.816864  | -1.451525 |
| C  | -3.551759  | 4.688957  | 1.818150  |
| H  | -3.418610  | 3.325403  | 3.466215  |
| H  | -3.703090  | 5.795622  | -0.036375 |
| O  | -3.566407  | 5.730773  | 2.696012  |
| C  | -3.655456  | 7.025234  | 2.145488  |
| H  | -4.585451  | 7.159481  | 1.573547  |
| H  | -3.648873  | 7.715312  | 2.991560  |
| H  | -2.801330  | 7.246001  | 1.488622  |
| Zn | -0.955248  | -0.168099 | -0.494219 |
| Zn | 1.898896   | -0.941656 | 0.752145  |
| C  | -0.735657  | -1.518273 | 2.363020  |
| O  | -0.024165  | -0.595005 | 1.958616  |
| O  | -1.569665  | -1.375912 | 3.372656  |
| C  | -1.667443  | -0.052138 | 3.970536  |
| H  | -1.591771  | 0.691936  | 3.171020  |
| H  | -0.801737  | 0.071932  | 4.631642  |
| C  | -2.979038  | -0.000442 | 4.701112  |
| H  | -3.815309  | -0.150230 | 4.009088  |
| H  | -3.100203  | 0.976828  | 5.179641  |
| H  | -3.035591  | -0.770904 | 5.476753  |
| C  | -0.679469  | -2.948729 | 1.838745  |
| C  | -0.165575  | -2.927800 | 0.376209  |
| O  | -0.690737  | -2.164003 | -0.491431 |
| O  | 0.200681   | -4.177190 | 0.006717  |
| C  | 0.695741   | -4.265121 | -1.338792 |
| H  | 1.454862   | -3.475823 | -1.469336 |
| H  | -0.124973  | -4.057279 | -2.035740 |
| C  | 1.280066   | -5.638505 | -1.521159 |
| H  | 2.098788   | -5.809862 | -0.813977 |
| H  | 1.679029   | -5.743424 | -2.536312 |
| H  | 0.522458   | -6.415121 | -1.370254 |
| C  | 0.311343   | -3.673511 | 2.762250  |
| H  | -0.115471  | -3.790395 | 3.763350  |
| H  | 1.249006   | -3.111506 | 2.839492  |
| H  | 0.558146   | -4.657455 | 2.357612  |
| C  | -2.059242  | -3.606098 | 1.820896  |

|   |           |           |          |
|---|-----------|-----------|----------|
| C | -2.212580 | -4.960719 | 2.122332 |
| C | -3.188180 | -2.864190 | 1.454436 |
| C | -3.469494 | -5.558788 | 2.084753 |
| H | -1.349136 | -5.564876 | 2.390768 |
| C | -4.444488 | -3.461480 | 1.429873 |
| H | -3.093957 | -1.808018 | 1.190288 |
| C | -4.591334 | -4.809754 | 1.746792 |
| H | -3.568002 | -6.615604 | 2.327565 |
| H | -5.314110 | -2.860748 | 1.166243 |
| H | -5.576163 | -5.273727 | 1.728675 |
| H | 1.267913  | -2.426922 | 0.654747 |

### IM7a

M06L SCF energy in Solvent: -6592.375200 a.u.

PBE0-D3BJ Free energy in Solvent: -6591.498066 a.u.

|   |           |           |           |
|---|-----------|-----------|-----------|
| O | -0.669708 | -0.577250 | -0.196802 |
| C | -1.148164 | -1.819511 | -0.038891 |
| C | -2.532587 | -2.086608 | -0.211495 |
| C | -2.976963 | -3.393402 | -0.025777 |
| H | -4.034672 | -3.612556 | -0.174248 |
| C | -2.120809 | -4.449400 | 0.306822  |
| C | -0.759122 | -4.170771 | 0.394080  |
| H | -0.053814 | -4.984081 | 0.583295  |
| C | -0.259075 | -2.880770 | 0.220034  |
| C | -2.652951 | -5.832396 | 0.531711  |
| H | -3.455768 | -6.080016 | -0.173821 |
| H | -3.076227 | -5.950492 | 1.539250  |
| H | -1.867972 | -6.590343 | 0.423114  |
| C | -3.456398 | -0.951806 | -0.719350 |
| O | -3.404141 | 0.147642  | 0.159558  |
| C | -4.932885 | -1.384928 | -0.790321 |
| C | -5.675760 | -1.624502 | 0.414880  |
| C | -5.580986 | -1.518492 | -2.001674 |
| C | -5.101475 | -1.555675 | 1.711664  |
| C | -7.061052 | -1.984814 | 0.318272  |
| C | -6.945686 | -1.862114 | -2.091311 |
| H | -5.029232 | -1.349226 | -2.923776 |
| C | -5.844824 | -1.823790 | 2.837812  |
| H | -4.057824 | -1.270564 | 1.794768  |
| C | -7.798685 | -2.243079 | 1.499660  |
| C | -7.674227 | -2.088790 | -0.953349 |
| H | -7.411602 | -1.946647 | -3.071930 |
| C | -7.208356 | -2.167228 | 2.737249  |
| H | -5.375046 | -1.766562 | 3.819628  |

|   |           |           |           |    |           |           |           |
|---|-----------|-----------|-----------|----|-----------|-----------|-----------|
| H | -8.851122 | -2.512012 | 1.402417  | H  | 6.932043  | 1.854848  | -2.831227 |
| H | -8.729451 | -2.358223 | -1.005223 | C  | 5.452452  | 0.754683  | -1.699914 |
| H | -7.787081 | -2.374654 | 3.636186  | H  | 4.656767  | 1.480450  | -1.851466 |
| C | -2.934528 | -0.552640 | -2.134657 | O  | 8.918361  | 0.298636  | -2.657533 |
| C | -3.039369 | 0.790413  | -2.636830 | C  | 9.944661  | -0.653855 | -2.504982 |
| C | -2.286507 | -1.488803 | -2.918584 | H  | 10.208918 | -0.802401 | -1.447365 |
| C | -3.848092 | 1.801986  | -2.037258 | H  | 9.665265  | -1.625916 | -2.938148 |
| C | -2.311206 | 1.147510  | -3.825796 | H  | 10.809524 | -0.255951 | -3.039969 |
| C | -1.627471 | -1.149140 | -4.115621 | C  | 3.953663  | -0.892598 | 1.124622  |
| H | -2.246358 | -2.521648 | -2.574755 | C  | 4.118914  | 0.230786  | 1.950637  |
| C | -3.865156 | 3.087447  | -2.530152 | C  | 4.080177  | -2.146073 | 1.720663  |
| H | -4.451891 | 1.540388  | -1.174587 | C  | 4.372299  | 0.108963  | 3.305353  |
| C | -2.341242 | 2.485909  | -4.288506 | H  | 4.025009  | 1.217551  | 1.497703  |
| C | -1.598809 | 0.156046  | -4.538926 | C  | 4.323002  | -2.293442 | 3.088943  |
| H | -1.109861 | -1.924775 | -4.679605 | H  | 3.977596  | -3.050952 | 1.121376  |
| C | -3.088295 | 3.445085  | -3.649480 | C  | 4.473109  | -1.160526 | 3.889077  |
| H | -4.496800 | 3.832783  | -2.047973 | H  | 4.492127  | 0.984071  | 3.941116  |
| H | -1.766627 | 2.734248  | -5.181193 | H  | 4.398098  | -3.292181 | 3.511379  |
| H | -1.052365 | 0.444808  | -5.436949 | O  | 4.714940  | -1.183887 | 5.229359  |
| H | -3.102795 | 4.468483  | -4.021458 | C  | 4.820946  | -2.451941 | 5.835769  |
| O | 2.975950  | 0.498599  | -0.569509 | H  | 5.651286  | -3.035890 | 5.412505  |
| N | 1.681603  | -1.945778 | -0.997125 | H  | 5.012554  | -2.266013 | 6.894391  |
| C | 1.223435  | -2.641087 | 0.221935  | H  | 3.891470  | -3.030584 | 5.730397  |
| H | 1.529350  | -2.031481 | 1.085028  | Zn | 1.118492  | 0.211879  | -0.445898 |
| H | 1.750936  | -3.610364 | 0.317666  | Zn | -1.819867 | 1.121779  | -0.065750 |
| C | 1.173581  | -2.583911 | -2.220524 | C  | -1.659052 | 3.654881  | 1.422282  |
| H | 1.397761  | -3.668919 | -2.197825 | O  | -2.480345 | 3.066553  | 0.716917  |
| H | 0.086975  | -2.469953 | -2.283075 | O  | -1.923567 | 4.836106  | 1.960414  |
| C | 1.935404  | -1.881467 | -3.318224 | C  | -3.237791 | 5.384756  | 1.667840  |
| H | 1.445496  | -0.924460 | -3.546488 | H  | -3.988818 | 4.666939  | 2.015506  |
| H | 1.962845  | -2.460432 | -4.247845 | H  | -3.335957 | 5.461955  | 0.579197  |
| C | 3.316820  | -1.649500 | -2.703256 | C  | -3.330873 | 6.713364  | 2.362498  |
| H | 3.687791  | -0.646721 | -2.933636 | H  | -3.207323 | 6.602771  | 3.444507  |
| H | 4.062906  | -2.354961 | -3.086095 | H  | -4.312119 | 7.161642  | 2.176316  |
| C | 3.147574  | -1.834669 | -1.177535 | H  | -2.565094 | 7.406043  | 1.999003  |
| H | 3.623697  | -2.783229 | -0.865290 | C  | -0.262850 | 3.129250  | 1.681353  |
| C | 3.763408  | -0.635778 | -0.379479 | C  | 0.359986  | 3.052419  | 0.217364  |
| C | 5.169185  | -0.391402 | -0.952305 | O  | -0.052511 | 1.934997  | -0.489550 |
| C | 6.188609  | -1.326567 | -0.780134 | O  | 1.745311  | 3.100799  | 0.366357  |
| H | 6.002997  | -2.224909 | -0.189192 | C  | 2.442605  | 3.453173  | -0.828496 |
| C | 7.453646  | -1.142924 | -1.334831 | H  | 1.947157  | 4.334145  | -1.275267 |
| H | 8.221545  | -1.896126 | -1.178451 | H  | 2.388641  | 2.626258  | -1.550873 |
| C | 7.718807  | 0.011771  | -2.074043 | C  | 3.868369  | 3.752015  | -0.452098 |
| C | 6.708459  | 0.961712  | -2.250778 | H  | 3.919384  | 4.566988  | 0.279078  |

|   |           |           |           |
|---|-----------|-----------|-----------|
| H | 4.449114  | 4.042493  | -1.335092 |
| H | 4.335691  | 2.860637  | -0.020359 |
| C | 0.547538  | 4.080444  | 2.559599  |
| H | 0.049033  | 4.241313  | 3.520920  |
| H | 0.674960  | 5.054022  | 2.073804  |
| H | 1.540389  | 3.664503  | 2.742372  |
| C | -0.323540 | 1.728528  | 2.289549  |
| C | 0.874340  | 1.008358  | 2.426327  |
| C | -1.514090 | 1.103322  | 2.683171  |
| C | 0.874153  | -0.294267 | 2.914017  |
| H | 1.815587  | 1.470009  | 2.131203  |
| C | -1.512205 | -0.209447 | 3.159410  |
| H | -2.471367 | 1.615736  | 2.602826  |
| C | -0.323415 | -0.915951 | 3.267915  |
| H | 1.822318  | -0.823991 | 3.008952  |
| H | -2.457960 | -0.674224 | 3.433281  |
| H | -0.325227 | -1.946464 | 3.618495  |
| H | 0.036960  | 3.965445  | -0.332422 |

### IM6b

M06L SCF energy in Solvent: -6687.274390 a.u.

PBE0-D3BJ Free energy in Solvent: -6686.277572 a.u.

|   |           |           |           |
|---|-----------|-----------|-----------|
| O | -0.889630 | -0.549520 | -0.165316 |
| C | -1.477229 | -1.656367 | -0.690202 |
| C | -2.891825 | -1.786193 | -0.753703 |
| C | -3.435338 | -2.906024 | -1.383833 |
| H | -4.519887 | -2.980407 | -1.453180 |
| C | -2.670197 | -3.931165 | -1.937097 |
| C | -1.291468 | -3.796430 | -1.850064 |
| H | -0.645677 | -4.570459 | -2.271987 |
| C | -0.687312 | -2.697059 | -1.238777 |
| C | -3.311746 | -5.124830 | -2.576091 |
| H | -4.170545 | -4.842648 | -3.197636 |
| H | -3.688624 | -5.834480 | -1.826599 |
| H | -2.605483 | -5.672380 | -3.211423 |
| C | -3.835897 | -0.693566 | -0.207301 |
| O | -3.388445 | -0.230547 | 1.044148  |
| C | -5.250325 | -1.279033 | 0.003510  |
| C | -5.488174 | -2.212817 | 1.066828  |
| C | -6.298608 | -0.946000 | -0.830841 |
| C | -4.466180 | -2.700131 | 1.924427  |
| C | -6.815756 | -2.722981 | 1.258395  |
| C | -7.600408 | -1.453521 | -0.641651 |
| H | -6.124500 | -0.267111 | -1.663831 |

|   |           |           |           |
|---|-----------|-----------|-----------|
| C | -4.742601 | -3.610175 | 2.918328  |
| H | -3.455982 | -2.327745 | 1.793162  |
| C | -7.066054 | -3.648009 | 2.301914  |
| C | -7.858177 | -2.315514 | 0.392466  |
| H | -8.396123 | -1.150147 | -1.320551 |
| C | -6.053916 | -4.085096 | 3.120303  |
| H | -3.936263 | -3.965589 | 3.558523  |
| H | -8.084994 | -4.014297 | 2.433039  |
| H | -8.860526 | -2.712244 | 0.556406  |
| H | -6.259157 | -4.800460 | 3.915576  |
| C | -3.885636 | 0.497171  | -1.206753 |
| C | -4.562295 | 1.718189  | -0.848802 |
| C | -3.279793 | 0.424112  | -2.448897 |
| C | -5.232114 | 1.903432  | 0.392000  |
| C | -4.603913 | 2.797110  | -1.794368 |
| C | -3.304579 | 1.496019  | -3.365363 |
| H | -2.784433 | -0.499258 | -2.741859 |
| C | -5.888327 | 3.078285  | 0.678862  |
| H | -5.204825 | 1.099646  | 1.120588  |
| C | -5.295377 | 3.989478  | -1.465719 |
| C | -3.962445 | 2.657276  | -3.049717 |
| H | -2.812043 | 1.384258  | -4.330664 |
| C | -5.923343 | 4.134729  | -0.253195 |
| H | -6.390732 | 3.189469  | 1.638412  |
| H | -5.320813 | 4.792136  | -2.204488 |
| H | -4.008823 | 3.486874  | -3.757467 |
| H | -6.451588 | 5.056552  | -0.014388 |
| O | 2.886430  | 0.011208  | -0.066068 |
| N | 1.408442  | -1.506471 | -1.849841 |
| C | 0.810484  | -2.683734 | -1.184156 |
| H | 1.160704  | -2.687715 | -0.144073 |
| H | 1.210414  | -3.603988 | -1.648062 |
| C | 0.927808  | -1.305121 | -3.225212 |
| H | 1.039065  | -2.244841 | -3.798328 |
| H | -0.136762 | -1.045100 | -3.214572 |
| C | 1.837137  | -0.210482 | -3.749207 |
| H | 1.433810  | 0.769286  | -3.463937 |
| H | 1.914226  | -0.224896 | -4.841262 |
| C | 3.176646  | -0.467512 | -3.042677 |
| H | 3.575771  | 0.450396  | -2.593564 |
| H | 3.944226  | -0.842841 | -3.728105 |
| C | 2.890702  | -1.499095 | -1.936739 |
| H | 3.220883  | -2.509564 | -2.243388 |
| C | 3.542897  | -1.101951 | -0.566308 |



|   |           |           |           |    |           |           |           |
|---|-----------|-----------|-----------|----|-----------|-----------|-----------|
| C | -4.888574 | -1.654672 | -0.003807 | H  | 2.361820  | -0.026801 | -4.930185 |
| C | -5.015794 | -2.588332 | 1.078695  | C  | 3.453812  | -0.059922 | -3.007505 |
| C | -5.987304 | -1.419717 | -0.806506 | H  | 3.643200  | 0.897301  | -2.505752 |
| C | -3.932628 | -2.975616 | 1.911633  | H  | 4.341385  | -0.282321 | -3.608488 |
| C | -6.289895 | -3.205504 | 1.315554  | C  | 3.228291  | -1.152143 | -1.946384 |
| C | -7.237176 | -2.025691 | -0.567530 | H  | 3.700878  | -2.105854 | -2.247693 |
| H | -5.898151 | -0.745766 | -1.655482 | C  | 3.744703  | -0.720663 | -0.520760 |
| C | -4.101785 | -3.896219 | 2.920227  | C  | 5.181665  | -0.192225 | -0.670740 |
| H | -2.960975 | -2.521808 | 1.747768  | C  | 6.144330  | -0.809899 | -1.470386 |
| C | -6.430199 | -4.138681 | 2.371399  | H  | 5.884110  | -1.688719 | -2.061171 |
| C | -7.389964 | -2.893768 | 0.481344  | C  | 7.446886  | -0.322247 | -1.569011 |
| H | -8.076026 | -1.794933 | -1.222325 | H  | 8.160675  | -0.831752 | -2.211477 |
| C | -5.360909 | -4.481190 | 3.162172  | C  | 7.811796  | 0.815821  | -0.848319 |
| H | -3.250052 | -4.175288 | 3.538815  | C  | 6.856654  | 1.458933  | -0.056211 |
| H | -7.410176 | -4.588065 | 2.534986  | H  | 7.150622  | 2.355073  | 0.486617  |
| H | -8.350803 | -3.368548 | 0.682052  | C  | 5.564930  | 0.962037  | 0.021952  |
| H | -5.481446 | -5.205187 | 3.966778  | H  | 4.816497  | 1.478610  | 0.618460  |
| C | -3.705263 | 0.169991  | -1.321842 | O  | 9.055269  | 1.375791  | -0.862802 |
| C | -4.474039 | 1.345495  | -0.996851 | C  | 10.035096 | 0.729485  | -1.641453 |
| C | -3.157402 | 0.075564  | -2.589553 | H  | 10.202566 | -0.304937 | -1.306457 |
| C | -5.097322 | 1.548001  | 0.264935  | H  | 9.764733  | 0.715586  | -2.707828 |
| C | -4.660440 | 2.356545  | -1.999340 | H  | 10.954280 | 1.304243  | -1.510894 |
| C | -3.335064 | 1.077504  | -3.565703 | C  | 3.760964  | -1.931905 | 0.436683  |
| H | -2.592262 | -0.814533 | -2.857338 | C  | 2.975405  | -1.921477 | 1.595945  |
| C | -5.831182 | 2.683144  | 0.523530  | C  | 4.514450  | -3.078891 | 0.186835  |
| H | -4.972245 | 0.791169  | 1.032159  | C  | 2.951856  | -2.996775 | 2.470856  |
| C | -5.420966 | 3.512469  | -1.695713 | H  | 2.350956  | -1.050674 | 1.786877  |
| C | -4.083424 | 2.190866  | -3.282082 | C  | 4.502480  | -4.173587 | 1.048784  |
| H | -2.885900 | 0.949191  | -4.549440 | H  | 5.143291  | -3.135447 | -0.700842 |
| C | -5.993598 | 3.680434  | -0.458546 | C  | 3.720120  | -4.134068 | 2.205287  |
| H | -6.294732 | 2.808762  | 1.500649  | H  | 2.334069  | -2.982754 | 3.367146  |
| H | -5.542799 | 4.268568  | -2.472424 | H  | 5.107422  | -5.045537 | 0.813017  |
| H | -4.245135 | 2.965202  | -4.033250 | O  | 3.637776  | -5.140383 | 3.119941  |
| H | -6.575179 | 4.574118  | -0.238290 | C  | 4.394307  | -6.301208 | 2.863259  |
| O | 2.939414  | 0.290104  | -0.016233 | H  | 5.471663  | -6.083327 | 2.820994  |
| N | 1.749942  | -1.335035 | -1.974654 | H  | 4.195844  | -6.981087 | 3.694320  |
| C | 1.231821  | -2.579117 | -1.361020 | H  | 4.093159  | -6.782173 | 1.920960  |
| H | 1.565308  | -2.589474 | -0.317248 | Zn | 1.147799  | 0.180131  | -0.639647 |
| H | 1.712568  | -3.443967 | -1.853840 | Zn | -1.704317 | 0.766576  | 0.625766  |
| C | 1.362519  | -1.195239 | -3.386665 | C  | 1.110935  | 1.961276  | 1.820788  |
| H | 1.635488  | -2.116931 | -3.934451 | O  | 0.486922  | 0.903777  | 1.717295  |
| H | 0.275671  | -1.072529 | -3.464840 | O  | 2.045498  | 2.181220  | 2.726409  |
| C | 2.170166  | 0.001594  | -3.852630 | C  | 2.414640  | 1.116597  | 3.645895  |
| H | 1.616405  | 0.926993  | -3.647675 | H  | 1.761443  | 0.257443  | 3.469002  |

|   |           |          |           |   |           |           |           |
|---|-----------|----------|-----------|---|-----------|-----------|-----------|
| H | 2.206897  | 1.522790 | 4.641485  | C | -0.301574 | -1.948071 | 2.187467  |
| C | 3.869401  | 0.795086 | 3.441227  | C | -2.791027 | -3.274233 | 4.754814  |
| H | 4.036572  | 0.428192 | 2.422863  | H | -3.611683 | -3.967402 | 4.532025  |
| H | 4.180658  | 0.011361 | 4.140871  | H | -3.201997 | -2.510090 | 5.429202  |
| H | 4.497188  | 1.677406 | 3.607187  | H | -2.032062 | -3.827565 | 5.320224  |
| C | 0.889573  | 3.205674 | 0.963244  | C | -3.489337 | -1.233937 | 0.144730  |
| C | 0.034492  | 2.858577 | -0.280709 | O | -3.238962 | 0.110185  | -0.238897 |
| O | 0.445782  | 1.989964 | -1.117509 | C | -4.971208 | -1.289161 | 0.546515  |
| O | -0.551125 | 3.979491 | -0.760947 | C | -5.500780 | -0.329766 | 1.473889  |
| C | -1.364027 | 3.755320 | -1.922344 | C | -5.819392 | -2.240312 | 0.017125  |
| H | -2.027010 | 2.904113 | -1.698977 | C | -4.706427 | 0.644548  | 2.137833  |
| H | -0.723797 | 3.460623 | -2.763500 | C | -6.900176 | -0.370423 | 1.788042  |
| C | -2.140804 | 5.013465 | -2.192065 | C | -7.193233 | -2.278133 | 0.332687  |
| H | -2.788625 | 5.261962 | -1.344901 | H | -5.421640 | -2.982743 | -0.672182 |
| H | -2.773739 | 4.874586 | -3.075741 | C | -5.261969 | 1.525261  | 3.038012  |
| H | -1.472103 | 5.861023 | -2.378604 | H | -3.643010 | 0.689751  | 1.920474  |
| C | 2.254474  | 3.655937 | 0.409720  | C | -7.440024 | 0.566166  | 2.703939  |
| H | 2.117316  | 4.443659 | -0.337844 | C | -7.726418 | -1.354029 | 1.193333  |
| H | 2.758729  | 2.809024 | -0.069644 | H | -7.824342 | -3.042817 | -0.117215 |
| H | 2.888327  | 4.033634 | 1.217028  | C | -6.642536 | 1.498830  | 3.319624  |
| C | 0.202721  | 4.256684 | 1.829025  | H | -4.623806 | 2.248689  | 3.544186  |
| C | 0.506691  | 5.614008 | 1.709413  | H | -8.508223 | 0.520529  | 2.918353  |
| C | -0.785293 | 3.872811 | 2.742109  | H | -8.787448 | -1.366467 | 1.443249  |
| C | -0.162826 | 6.561673 | 2.476635  | H | -7.068750 | 2.206256  | 4.029195  |
| H | 1.265872  | 5.941161 | 1.002403  | C | -3.190105 | -2.176562 | -1.055715 |
| C | -1.456138 | 4.818888 | 3.510548  | C | -3.502373 | -1.784934 | -2.405994 |
| H | -1.035139 | 2.817673 | 2.861450  | C | -2.551686 | -3.386832 | -0.857171 |
| C | -1.147274 | 6.169021 | 3.379323  | C | -4.286341 | -0.640991 | -2.739650 |
| H | 0.088226  | 7.615379 | 2.366368  | C | -3.040273 | -2.607484 | -3.492861 |
| H | -2.221193 | 4.495506 | 4.214023  | C | -2.119701 | -4.197445 | -1.924785 |
| H | -1.668885 | 6.912262 | 3.979649  | H | -2.343650 | -3.712013 | 0.160681  |
| H | -1.201302 | 2.298556 | 0.408917  | C | -4.548725 | -0.312243 | -4.050442 |

### IM7b

M06L SCF energy in Solvent: -6687.291072 a.u.

PBE0-D3BJ Free energy in Solvent: -6686.292686 a.u.

|   |           |           |          |   |           |           |           |
|---|-----------|-----------|----------|---|-----------|-----------|-----------|
| O | -0.641797 | -0.982466 | 0.038261 | C | -4.052356 | -1.099056 | -5.108519 |
| C | -1.160095 | -1.493996 | 1.166882 | H | -5.154243 | 0.565717  | -4.268488 |
| C | -2.563795 | -1.638074 | 1.311214 | H | -2.951857 | -2.863633 | -5.632501 |
| C | -3.050797 | -2.227582 | 2.475307 | H | -1.984854 | -4.406349 | -4.057990 |
| H | -4.127389 | -2.365209 | 2.578709 | H | -4.262720 | -0.822402 | -6.140149 |
| C | -2.218353 | -2.669096 | 3.508748 | O | 3.070426  | -0.452477 | -0.791816 |
| C | -0.844113 | -2.526333 | 3.334557 | N | 1.698799  | -2.319606 | 0.757515  |
| H | -0.163722 | -2.885180 | 4.110606 | C | 1.188602  | -1.816338 | 2.046829  |



|   |           |           |           |                                                     |           |           |           |
|---|-----------|-----------|-----------|-----------------------------------------------------|-----------|-----------|-----------|
| H | 1.489891  | -0.759568 | 2.134108  | Zn                                                  | 1.208976  | -0.545815 | -0.570350 |
| H | 1.689829  | -2.341664 | 2.882697  | Zn                                                  | -1.693514 | 0.223185  | -1.264309 |
| C | 1.172157  | -3.643496 | 0.401913  | C                                                   | -1.683832 | 2.956746  | -1.015939 |
| H | 1.342163  | -4.356646 | 1.231912  | O                                                   | -2.264267 | 2.333817  | -1.906108 |
| H | 0.092584  | -3.586409 | 0.224378  | O                                                   | -2.322377 | 3.671645  | -0.105288 |
| C | 1.981178  | -4.007406 | -0.822315 | C                                                   | -3.778288 | 3.558662  | -0.125779 |
| H | 1.546175  | -3.514468 | -1.703839 | H                                                   | -4.026432 | 2.491755  | -0.047209 |
| H | 1.984111  | -5.084091 | -1.023117 | H                                                   | -4.130761 | 3.921595  | -1.097775 |
| C | 3.369810  | -3.438175 | -0.518838 | C                                                   | -4.295932 | 4.371637  | 1.025130  |
| H | 3.806756  | -2.962152 | -1.402138 | H                                                   | -3.873160 | 4.017224  | 1.970885  |
| H | 4.070467  | -4.217406 | -0.198275 | H                                                   | -5.384276 | 4.269324  | 1.089142  |
| C | 3.170360  | -2.406893 | 0.612747  | H                                                   | -4.050308 | 5.433003  | 0.912228  |
| H | 3.605071  | -2.790175 | 1.554618  | C                                                   | -0.177642 | 2.915460  | -0.796736 |
| C | 3.794276  | -1.015015 | 0.256716  | C                                                   | 0.463207  | 2.013528  | -1.903274 |
| C | 5.241756  | -1.251661 | -0.201714 | O                                                   | 0.100414  | 0.658007  | -1.829143 |
| C | 6.209146  | -1.767438 | 0.659468  | O                                                   | 1.836875  | 2.151376  | -1.732522 |
| H | 5.953498  | -1.987133 | 1.695701  | C                                                   | 2.616888  | 1.762342  | -2.862163 |
| C | 7.516463  | -2.005358 | 0.240337  | H                                                   | 2.200807  | 2.256157  | -3.758123 |
| H | 8.239028  | -2.406529 | 0.946314  | H                                                   | 2.549294  | 0.674242  | -3.008074 |
| C | 7.879376  | -1.717383 | -1.077116 | C                                                   | 4.035291  | 2.190656  | -2.600272 |
| C | 6.920375  | -1.206457 | -1.955634 | H                                                   | 4.085510  | 3.270489  | -2.417103 |
| H | 7.217244  | -0.991296 | -2.980272 | H                                                   | 4.675879  | 1.952106  | -3.456968 |
| C | 5.622518  | -0.983646 | -1.521321 | H                                                   | 4.429230  | 1.663796  | -1.724361 |
| H | 4.872591  | -0.598539 | -2.207880 | C                                                   | 0.066591  | 2.310453  | 0.593179  |
| O | 9.128407  | -1.899442 | -1.594026 | H                                                   | 1.117050  | 2.010844  | 0.703999  |
| C | 10.111769 | -2.404408 | -0.721322 | H                                                   | -0.556145 | 1.422082  | 0.766430  |
| H | 10.274939 | -1.736464 | 0.137380  | H                                                   | -0.174371 | 3.031821  | 1.379898  |
| H | 9.848348  | -3.404309 | -0.345256 | C                                                   | 0.399797  | 4.314534  | -0.953089 |
| H | 11.031290 | -2.470221 | -1.306716 | C                                                   | 1.389707  | 4.802746  | -0.099021 |
| C | 3.825321  | -0.055155 | 1.461352  | C                                                   | -0.007900 | 5.109551  | -2.029057 |
| C | 3.593592  | 1.310652  | 1.240663  | C                                                   | 1.954485  | 6.056387  | -0.310964 |
| C | 4.115914  | -0.449474 | 2.769750  | H                                                   | 1.735010  | 4.194102  | 0.734639  |
| C | 3.641750  | 2.231041  | 2.276953  | C                                                   | 0.556002  | 6.363399  | -2.243785 |
| H | 3.358514  | 1.642181  | 0.229544  | H                                                   | -0.776921 | 4.741507  | -2.711668 |
| C | 4.159968  | 0.459931  | 3.825476  | C                                                   | 1.540452  | 6.841736  | -1.383502 |
| H | 4.291672  | -1.499799 | 3.002148  | H                                                   | 2.726770  | 6.418769  | 0.365762  |
| C | 3.923792  | 1.813866  | 3.580884  | H                                                   | 0.224047  | 6.967774  | -3.086309 |
| H | 3.470491  | 3.291637  | 2.098288  | H                                                   | 1.982877  | 7.822545  | -1.547801 |
| H | 4.375424  | 0.101835  | 4.829048  | H                                                   | 0.161802  | 2.401776  | -2.895222 |
| O | 3.944196  | 2.788775  | 4.532487  |                                                     |           |           |           |
| C | 4.232560  | 2.386315  | 5.852071  |                                                     |           |           |           |
| H | 5.227742  | 1.923831  | 5.927188  |                                                     |           |           |           |
| H | 4.210285  | 3.294581  | 6.457534  |                                                     |           |           |           |
| H | 3.483477  | 1.676678  | 6.233546  |                                                     |           |           |           |
|   |           |           |           | <b>TS6a</b>                                         |           |           |           |
|   |           |           |           | M06L SCF energy in Solvent: -7322.524825 a.u.       |           |           |           |
|   |           |           |           | PBE0-D3BJ Free energy in Solvent: -7321.398938 a.u. |           |           |           |
|   |           |           |           | O                                                   | -0.588796 | -0.969397 | -0.433521 |

|   |           |           |           |   |           |           |           |
|---|-----------|-----------|-----------|---|-----------|-----------|-----------|
| C | -1.047836 | -2.186492 | -0.825682 | H | -6.413036 | 2.213049  | 1.340127  |
| C | -2.428532 | -2.520598 | -0.804265 | H | -6.463552 | 3.018300  | -2.883624 |
| C | -2.810501 | -3.769683 | -1.300062 | H | -5.368090 | 1.532274  | -4.425772 |
| H | -3.873851 | -4.011412 | -1.297469 | H | -7.135784 | 3.639521  | -0.577336 |
| C | -1.918557 | -4.718682 | -1.796196 | O | 2.972296  | -0.233689 | 0.034990  |
| C | -0.570190 | -4.384976 | -1.766675 | N | 1.831780  | -1.751172 | -1.939819 |
| H | 0.172990  | -5.102578 | -2.122462 | C | 1.354136  | -2.933806 | -1.197633 |
| C | -0.124526 | -3.156783 | -1.280879 | H | 1.666045  | -2.799471 | -0.151933 |
| C | -2.396502 | -6.042902 | -2.309683 | H | 1.888913  | -3.828825 | -1.564687 |
| H | -3.201715 | -5.929599 | -3.046918 | C | 1.398623  | -1.696347 | -3.341622 |
| H | -2.798096 | -6.671416 | -1.503490 | H | 1.658138  | -2.640418 | -3.856724 |
| H | -1.586328 | -6.605134 | -2.788286 | H | 0.310179  | -1.574208 | -3.394498 |
| C | -3.538346 | -1.567238 | -0.286513 | C | 2.196881  | -0.523027 | -3.873786 |
| O | -3.091370 | -0.785530 | 0.785936  | H | 1.689919  | 0.413188  | -3.599248 |
| C | -4.720684 | -2.406677 | 0.260026  | H | 2.290110  | -0.532974 | -4.964323 |
| C | -4.542484 | -3.207139 | 1.438624  | C | 3.545167  | -0.644818 | -3.148836 |
| C | -5.953800 | -2.411091 | -0.360545 | H | 3.924720  | 0.324797  | -2.812639 |
| C | -3.305169 | -3.329392 | 2.125264  | H | 4.316680  | -1.054657 | -3.810338 |
| C | -5.656957 | -3.958456 | 1.942173  | C | 3.305995  | -1.605075 | -1.962998 |
| C | -7.048085 | -3.144121 | 0.143568  | H | 3.737269  | -2.594328 | -2.202197 |
| H | -6.099869 | -1.835035 | -1.271529 | C | 3.843925  | -1.142772 | -0.553365 |
| C | -3.179343 | -4.134460 | 3.233814  | C | 5.221769  | -0.481804 | -0.721611 |
| H | -2.452221 | -2.761145 | 1.769510  | C | 6.192431  | -0.971566 | -1.596199 |
| C | -5.494198 | -4.766879 | 3.093689  | H | 5.974642  | -1.835807 | -2.225141 |
| C | -6.905808 | -3.898293 | 1.277932  | C | 7.447515  | -0.377641 | -1.713508 |
| H | -8.003057 | -3.103629 | -0.378424 | H | 8.168611  | -0.785871 | -2.416984 |
| C | -4.281259 | -4.858935 | 3.730631  | C | 7.757224  | 0.735526  | -0.929775 |
| H | -2.214587 | -4.211314 | 3.733646  | C | 6.800854  | 1.234849  | -0.040687 |
| H | -6.357835 | -5.324391 | 3.458056  | H | 7.058398  | 2.101940  | 0.564183  |
| H | -7.741411 | -4.471283 | 1.681119  | C | 5.556191  | 0.631699  | 0.057197  |
| H | -4.168501 | -5.489484 | 4.611510  | H | 4.808352  | 1.025637  | 0.743722  |
| C | -4.029539 | -0.656731 | -1.445207 | O | 8.948036  | 1.398141  | -0.961663 |
| C | -4.863483 | 0.488965  | -1.175548 | C | 9.929445  | 0.906442  | -1.844890 |
| C | -3.720110 | -0.944919 | -2.762098 | H | 10.211974 | -0.128859 | -1.603288 |
| C | -5.298410 | 0.857982  | 0.127909  | H | 9.592404  | 0.945449  | -2.891424 |
| C | -5.331139 | 1.284443  | -2.277665 | H | 10.798884 | 1.555552  | -1.722487 |
| C | -4.199576 | -0.171068 | -3.839482 | C | 4.049956  | -2.369152 | 0.367771  |
| H | -3.101289 | -1.811995 | -2.982632 | C | 3.515032  | -2.363688 | 1.659163  |
| C | -6.098109 | 1.960445  | 0.328315  | C | 4.792355  | -3.489011 | -0.008235 |
| H | -4.969564 | 0.259902  | 0.970832  | C | 3.702025  | -3.420932 | 2.535087  |
| C | -6.136147 | 2.423787  | -2.030112 | H | 2.918784  | -1.507600 | 1.957547  |
| C | -4.993043 | 0.921317  | -3.603793 | C | 4.990832  | -4.567231 | 0.853018  |
| H | -3.932961 | -0.450199 | -4.858146 | H | 5.249052  | -3.536896 | -0.996910 |
| C | -6.511702 | 2.763889  | -0.753259 | C | 4.445003  | -4.536155 | 2.137994  |

|    |           |           |           |
|----|-----------|-----------|-----------|
| H  | 3.275999  | -3.407927 | 3.536977  |
| H  | 5.575006  | -5.418918 | 0.514199  |
| O  | 4.579766  | -5.527963 | 3.062233  |
| C  | 5.315151  | -6.665936 | 2.674053  |
| H  | 6.354960  | -6.411420 | 2.420960  |
| H  | 5.307534  | -7.338704 | 3.533809  |
| H  | 4.854933  | -7.171696 | 1.812426  |
| Zn | 1.189423  | -0.175520 | -0.633295 |
| Zn | -1.824961 | 0.500260  | 0.303271  |
| C  | 0.366519  | 1.856756  | 2.282779  |
| O  | 0.220023  | 1.032144  | 1.379084  |
| O  | 1.274837  | 1.723258  | 3.229844  |
| C  | 2.168065  | 0.577345  | 3.111644  |
| H  | 1.567251  | -0.323930 | 3.287876  |
| H  | 2.542262  | 0.535957  | 2.080703  |
| C  | 3.266679  | 0.751090  | 4.119876  |
| H  | 2.879248  | 0.790701  | 5.143309  |
| H  | 3.960540  | -0.093946 | 4.046228  |
| H  | 3.830908  | 1.669988  | 3.927583  |
| C  | -0.421093 | 3.155526  | 2.450288  |
| C  | -1.573609 | 3.175749  | 1.417789  |
| O  | -2.315229 | 2.155191  | 1.300593  |
| O  | -2.148887 | 4.409114  | 1.360061  |
| C  | -3.248146 | 4.480077  | 0.434921  |
| H  | -2.867063 | 4.187469  | -0.561111 |
| H  | -4.011437 | 3.745915  | 0.717643  |
| C  | -3.769087 | 5.889784  | 0.438347  |
| H  | -2.997096 | 6.604829  | 0.132850  |
| H  | -4.610369 | 5.974467  | -0.258164 |
| H  | -4.122823 | 6.174694  | 1.435258  |
| C  | -1.081198 | 3.133696  | 3.841976  |
| H  | -1.756693 | 3.985882  | 3.954797  |
| H  | -1.676876 | 2.223179  | 3.964089  |
| H  | -0.320189 | 3.173749  | 4.625847  |
| C  | 0.531694  | 4.332222  | 2.268685  |
| C  | 1.699443  | 4.192024  | 1.513373  |
| C  | 0.237061  | 5.587546  | 2.809623  |
| C  | 2.553011  | 5.270410  | 1.305526  |
| H  | 1.948772  | 3.228746  | 1.061596  |
| C  | 1.089120  | 6.667297  | 2.604107  |
| H  | -0.675032 | 5.730628  | 3.384735  |
| C  | 2.252017  | 6.512793  | 1.853078  |
| H  | 3.451853  | 5.135575  | 0.705879  |
| H  | 0.840361  | 7.636258  | 3.033666  |

|    |           |          |           |
|----|-----------|----------|-----------|
| H  | 2.918929  | 7.358279 | 1.693997  |
| H  | -1.038016 | 1.533971 | -0.928623 |
| H  | -0.773637 | 3.221555 | 0.169140  |
| Si | -0.187194 | 2.834868 | -1.297228 |
| O  | 1.200658  | 1.815526 | -1.337458 |
| O  | -1.046554 | 3.059477 | -2.705439 |
| O  | 0.663737  | 4.286072 | -1.348765 |
| C  | 2.508546  | 2.330529 | -1.666610 |
| H  | 3.240111  | 1.634184 | -1.247987 |
| H  | 2.610738  | 2.397963 | -2.756180 |
| H  | 2.634013  | 3.325874 | -1.238547 |
| C  | -0.001092 | 5.507318 | -1.147483 |
| H  | -0.419659 | 5.576356 | -0.129806 |
| H  | 0.727976  | 6.317113 | -1.268591 |
| H  | -0.811536 | 5.654342 | -1.878634 |
| C  | -1.968384 | 2.108688 | -3.188270 |
| H  | -2.464229 | 2.533058 | -4.067703 |
| H  | -1.473569 | 1.169142 | -3.483662 |
| H  | -2.737401 | 1.862389 | -2.442838 |

#### TS6b

M06L SCF energy in Solvent: -7322.522157 a.u.

PBE0-D3BJ Free energy in Solvent: -7321.395939 a.u.

|   |           |          |           |
|---|-----------|----------|-----------|
| O | 0.133723  | 0.756134 | -0.818808 |
| C | 0.447101  | 2.026086 | -1.182463 |
| C | 1.795751  | 2.462063 | -1.300052 |
| C | 2.019631  | 3.745738 | -1.805413 |
| H | 3.050967  | 4.072281 | -1.931614 |
| C | 1.008095  | 4.636709 | -2.160754 |
| C | -0.298839 | 4.209051 | -1.971025 |
| H | -1.129610 | 4.880435 | -2.201206 |
| C | -0.590746 | 2.938539 | -1.478486 |
| C | 1.328085  | 5.999043 | -2.696542 |
| H | 1.873176  | 6.607308 | -1.962627 |
| H | 0.419116  | 6.548838 | -2.966621 |
| H | 1.961590  | 5.949277 | -3.591804 |
| C | 3.032439  | 1.584741 | -0.950166 |
| O | 2.838413  | 0.800056 | 0.200025  |
| C | 4.222983  | 2.520692 | -0.628226 |
| C | 4.238795  | 3.265905 | 0.597852  |
| C | 5.271787  | 2.679034 | -1.511969 |
| C | 3.171737  | 3.259416 | 1.536635  |
| C | 5.370956  | 4.098488 | 0.889178  |
| C | 6.376486  | 3.507037 | -1.226811 |

|   |           |           |           |    |            |           |           |
|---|-----------|-----------|-----------|----|------------|-----------|-----------|
| H | 5.255169  | 2.146316  | -2.460946 | C  | -4.283788  | 0.591729  | -0.346144 |
| C | 3.233432  | 3.998863  | 2.695419  | C  | -5.664689  | -0.084789 | -0.401814 |
| H | 2.298352  | 2.650677  | 1.331047  | C  | -6.808584  | 0.605667  | -0.801671 |
| C | 5.406852  | 4.834991  | 2.099021  | H  | -6.741719  | 1.661151  | -1.068084 |
| C | 6.432994  | 4.193120  | -0.041371 | C  | -8.054514  | -0.013299 | -0.875233 |
| H | 7.183312  | 3.590551  | -1.953407 | H  | -8.919028  | 0.563709  | -1.193367 |
| C | 4.364024  | 4.786967  | 2.990961  | C  | -8.173691  | -1.362760 | -0.533887 |
| H | 2.395129  | 3.974054  | 3.390707  | C  | -7.038756  | -2.068292 | -0.126846 |
| H | 6.283117  | 5.451965  | 2.301049  | H  | -7.147890  | -3.118264 | 0.137992  |
| H | 7.285073  | 4.829393  | 0.199362  | C  | -5.805922  | -1.434718 | -0.065489 |
| H | 4.402292  | 5.363133  | 3.914435  | H  | -4.921431  | -1.986649 | 0.244334  |
| C | 3.374977  | 0.648864  | -2.134499 | O  | -9.338784  | -2.070722 | -0.567513 |
| C | 4.426248  | -0.326387 | -2.004051 | C  | -10.494538 | -1.380705 | -0.982491 |
| C | 2.691368  | 0.722624  | -3.333893 | H  | -10.731683 | -0.541429 | -0.311966 |
| C | 5.231328  | -0.459608 | -0.839826 | H  | -10.392721 | -0.995376 | -2.008019 |
| C | 4.729728  | -1.176150 | -3.119857 | H  | -11.308838 | -2.107600 | -0.950181 |
| C | 2.988040  | -0.122997 | -4.423487 | C  | -4.344670  | 1.684537  | 0.743038  |
| H | 1.910330  | 1.471468  | -3.451682 | C  | -3.830205  | 1.391748  | 2.012500  |
| C | 6.269156  | -1.361887 | -0.789092 | C  | -4.922888  | 2.943071  | 0.567228  |
| H | 5.009433  | 0.162309  | 0.021386  | C  | -3.870251  | 2.310492  | 3.047533  |
| C | 5.780761  | -2.121903 | -3.017046 | H  | -3.381804  | 0.414202  | 2.170106  |
| C | 3.989469  | -1.053713 | -4.320995 | C  | -4.971328  | 3.885430  | 1.594836  |
| H | 2.419750  | -0.023966 | -5.347566 | H  | -5.344641  | 3.231065  | -0.395641 |
| C | 6.544349  | -2.213121 | -1.879180 | C  | -4.440453  | 3.570881  | 2.846297  |
| H | 6.883887  | -1.420426 | 0.109100  | H  | -3.460240  | 2.075583  | 4.027579  |
| H | 5.983787  | -2.762826 | -3.875860 | H  | -5.421254  | 4.856619  | 1.405215  |
| H | 4.235681  | -1.709508 | -5.157072 | O  | -4.430573  | 4.411271  | 3.918852  |
| H | 7.362910  | -2.930117 | -1.820629 | C  | -4.994976  | 5.688813  | 3.733566  |
| O | -3.326077 | -0.362635 | -0.025982 | H  | -6.060992  | 5.628169  | 3.468433  |
| N | -2.530125 | 1.433121  | -1.947480 | H  | -4.889970  | 6.207286  | 4.688695  |
| C | -2.023215 | 2.604165  | -1.205841 | H  | -4.468121  | 6.256367  | 2.952199  |
| H | -2.170373 | 2.390829  | -0.136904 | Zn | -1.609243  | -0.153967 | -0.823860 |
| H | -2.661075 | 3.477628  | -1.434420 | Zn | 1.488269   | -0.470433 | 0.123674  |
| C | -2.318204 | 1.492501  | -3.398828 | C  | 0.199638   | -2.315899 | 1.874887  |
| H | -2.700582 | 2.451125  | -3.798060 | O  | 0.219966   | -1.087582 | 1.512731  |
| H | -1.247097 | 1.439107  | -3.626526 | O  | -0.909791  | -2.785748 | 2.494167  |
| C | -3.134467 | 0.313304  | -3.890911 | C  | -2.132702  | -2.178071 | 2.050963  |
| H | -2.549452 | -0.609562 | -3.770029 | H  | -2.073134  | -1.095989 | 2.208178  |
| H | -3.395767 | 0.393010  | -4.950945 | H  | -2.215814  | -2.341753 | 0.966302  |
| C | -4.356183 | 0.301921  | -2.960024 | C  | -3.273946  | -2.807370 | 2.797770  |
| H | -4.610600 | -0.710652 | -2.630114 | H  | -3.152066  | -2.683235 | 3.879456  |
| H | -5.251990 | 0.691993  | -3.455969 | H  | -4.211847  | -2.323088 | 2.503588  |
| C | -3.983672 | 1.199138  | -1.764209 | H  | -3.350877  | -3.878457 | 2.580349  |
| H | -4.492765 | 2.173130  | -1.868417 | C  | 1.460290   | -2.997714 | 2.495623  |

|    |           |           |           |
|----|-----------|-----------|-----------|
| C  | 2.570680  | -3.041955 | 1.454514  |
| O  | 2.672894  | -2.292134 | 0.486091  |
| O  | 3.476192  | -3.975129 | 1.703902  |
| C  | 4.604153  | -4.004696 | 0.785703  |
| H  | 4.214279  | -4.132499 | -0.231281 |
| H  | 5.088539  | -3.023301 | 0.821555  |
| C  | 5.508267  | -5.123355 | 1.214873  |
| H  | 4.999152  | -6.091549 | 1.166540  |
| H  | 6.378725  | -5.162397 | 0.550976  |
| H  | 5.867101  | -4.973478 | 2.238423  |
| C  | 1.117329  | -4.427421 | 2.917723  |
| H  | 0.292265  | -4.434472 | 3.630255  |
| H  | 0.793825  | -5.005136 | 2.043827  |
| H  | 1.985608  | -4.918600 | 3.363344  |
| C  | 1.946152  | -2.105507 | 3.645759  |
| C  | 1.617982  | -2.399784 | 4.970846  |
| C  | 2.679977  | -0.941669 | 3.377400  |
| C  | 2.015473  | -1.554460 | 6.003332  |
| H  | 1.043124  | -3.292310 | 5.206332  |
| C  | 3.074394  | -0.097044 | 4.409467  |
| H  | 2.956818  | -0.675015 | 2.356744  |
| C  | 2.743828  | -0.401391 | 5.727339  |
| H  | 1.750297  | -1.801938 | 7.029798  |
| H  | 3.639338  | 0.802656  | 4.172600  |
| H  | 3.052207  | 0.258178  | 6.536629  |
| H  | 0.616679  | -1.750853 | -0.930624 |
| H  | 0.169963  | -3.027221 | 0.628268  |
| Si | -0.113438 | -3.127523 | -0.972007 |
| O  | -1.491311 | -2.191153 | -1.475385 |
| O  | 0.889146  | -3.758865 | -2.141162 |
| O  | -0.873883 | -4.574975 | -0.544093 |
| C  | -2.744639 | -2.819396 | -1.782342 |
| H  | -3.532676 | -2.075329 | -1.647989 |
| H  | -2.727592 | -3.182214 | -2.817851 |
| H  | -2.925920 | -3.656047 | -1.100471 |
| C  | -1.043689 | -5.652359 | -1.436716 |
| H  | -0.080237 | -6.036039 | -1.794513 |
| H  | -1.573357 | -6.451273 | -0.904300 |
| H  | -1.641668 | -5.374896 | -2.320461 |
| C  | 1.881374  | -3.035432 | -2.827981 |
| H  | 2.840587  | -3.562647 | -2.743778 |
| H  | 1.616498  | -2.953238 | -3.890080 |
| H  | 2.016334  | -2.018219 | -2.428128 |

### TS6c

M06L SCF energy in Solvent: -7322.527250 a.u.

PBE0-D3BJ Free energy in Solvent: -7321.401149 a.u.

|   |           |           |           |
|---|-----------|-----------|-----------|
| O | -0.323383 | -1.238088 | -0.160832 |
| C | -0.693529 | -2.541557 | -0.135775 |
| C | -2.061415 | -2.908371 | -0.222899 |
| C | -2.373616 | -4.268401 | -0.220959 |
| H | -3.417943 | -4.563583 | -0.309273 |
| C | -1.415077 | -5.280789 | -0.131357 |
| C | -0.081911 | -4.892970 | -0.079523 |
| H | 0.702838  | -5.652238 | -0.037010 |
| C | 0.292200  | -3.549347 | -0.079944 |
| C | -1.819566 | -6.723280 | -0.095935 |
| H | -0.968149 | -7.387132 | -0.286267 |
| H | -2.592452 | -6.948852 | -0.841238 |
| H | -2.236688 | -7.004114 | 0.880898  |
| C | -3.162378 | -1.837682 | -0.414790 |
| O | -3.084554 | -0.837235 | 0.578960  |
| C | -4.557005 | -2.493165 | -0.280857 |
| C | -5.041048 | -2.915082 | 1.003012  |
| C | -5.345803 | -2.723390 | -1.390362 |
| C | -4.272364 | -2.837453 | 2.195425  |
| C | -6.347113 | -3.504054 | 1.093947  |
| C | -6.627535 | -3.302455 | -1.296682 |
| H | -4.977979 | -2.442236 | -2.374915 |
| C | -4.770263 | -3.284696 | 3.397650  |
| H | -3.276664 | -2.411419 | 2.142803  |
| C | -6.833960 | -3.936866 | 2.351836  |
| C | -7.126988 | -3.671846 | -0.075180 |
| H | -7.215311 | -3.447563 | -2.201888 |
| C | -6.066430 | -3.830530 | 3.485362  |
| H | -4.151672 | -3.218566 | 4.291626  |
| H | -7.833357 | -4.371281 | 2.395947  |
| H | -8.119003 | -4.115110 | 0.016305  |
| H | -6.450653 | -4.175565 | 4.444181  |
| C | -3.014923 | -1.184862 | -1.815099 |
| C | -3.839569 | -0.064882 | -2.184767 |
| C | -2.117302 | -1.668151 | -2.748872 |
| C | -4.825818 | 0.495817  | -1.328087 |
| C | -3.713844 | 0.490141  | -3.502439 |
| C | -1.964360 | -1.089920 | -4.025288 |
| H | -1.515927 | -2.540064 | -2.500915 |
| C | -5.630270 | 1.531041  | -1.748079 |
| H | -4.927991 | 0.094139  | -0.324691 |

|   |           |           |           |    |           |           |           |
|---|-----------|-----------|-----------|----|-----------|-----------|-----------|
| C | -4.546950 | 1.567320  | -3.893479 | H  | 3.067630  | -0.290419 | 2.074439  |
| C | -2.754146 | -0.034069 | -4.400953 | C  | 5.336903  | -3.370150 | 2.551865  |
| H | -1.230801 | -1.505040 | -4.716249 | H  | 5.591143  | -3.324122 | 0.436190  |
| C | -5.490954 | 2.081416  | -3.038122 | C  | 4.751296  | -2.773688 | 3.670141  |
| H | -6.390168 | 1.927218  | -1.073863 | H  | 3.478533  | -1.195917 | 4.372572  |
| H | -4.422936 | 1.977619  | -4.896604 | H  | 5.973737  | -4.245282 | 2.653987  |
| H | -2.662356 | 0.414430  | -5.390767 | O  | 4.910150  | -3.208387 | 4.952605  |
| H | -6.131280 | 2.903667  | -3.354735 | C  | 5.731800  | -4.336101 | 5.146327  |
| O | 3.041533  | -0.115475 | -0.210965 | H  | 6.759853  | -4.154165 | 4.799610  |
| N | 2.186094  | -2.492053 | -1.277667 | H  | 5.741224  | -4.522954 | 6.222150  |
| C | 1.748711  | -3.199756 | -0.049600 | H  | 5.336027  | -5.221958 | 4.627668  |
| H | 1.981663  | -2.538379 | 0.795509  | Zn | 1.344225  | -0.575531 | -0.926724 |
| H | 2.361670  | -4.109274 | 0.078359  | Zn | -1.596910 | 0.275971  | 0.469536  |
| C | 1.911704  | -3.222861 | -2.523031 | C  | -0.275345 | 2.420564  | 1.938982  |
| H | 2.332767  | -4.242986 | -2.451203 | O  | -0.515931 | 1.177902  | 1.903151  |
| H | 0.831610  | -3.321687 | -2.677939 | O  | 0.896035  | 2.854206  | 2.446341  |
| C | 2.631590  | -2.387821 | -3.568842 | C  | 1.978822  | 1.904884  | 2.361226  |
| H | 1.958866  | -1.601860 | -3.941007 | H  | 1.744299  | 1.062681  | 3.024950  |
| H | 2.932202  | -2.983785 | -4.436385 | H  | 2.034442  | 1.514039  | 1.333600  |
| C | 3.822004  | -1.774421 | -2.809303 | C  | 3.250662  | 2.606931  | 2.745104  |
| H | 3.831859  | -0.680748 | -2.888958 | H  | 3.195277  | 3.013347  | 3.761264  |
| H | 4.788202  | -2.117625 | -3.191738 | H  | 4.085258  | 1.897796  | 2.701740  |
| C | 3.639261  | -2.179751 | -1.340450 | H  | 3.468661  | 3.429462  | 2.055160  |
| H | 4.190418  | -3.115431 | -1.135126 | C  | -1.390049 | 3.451474  | 2.244265  |
| C | 4.034549  | -1.078858 | -0.292191 | C  | -2.646581 | 3.069297  | 1.474772  |
| C | 5.340216  | -0.396422 | -0.737182 | O  | -2.719216 | 2.243521  | 0.574231  |
| C | 6.458669  | -1.108144 | -1.169744 | O  | -3.695036 | 3.789225  | 1.857545  |
| H | 6.423748  | -2.196895 | -1.233671 | C  | -4.913817 | 3.549896  | 1.104374  |
| C | 7.638921  | -0.468058 | -1.544613 | H  | -4.696698 | 3.738986  | 0.044987  |
| H | 8.485737  | -1.060695 | -1.881320 | H  | -5.167668 | 2.487388  | 1.196243  |
| C | 7.714624  | 0.924640  | -1.479647 | C  | -5.972254 | 4.459550  | 1.658455  |
| C | 6.601635  | 1.653240  | -1.050575 | H  | -5.681027 | 5.510722  | 1.564355  |
| H | 6.675812  | 2.738333  | -1.013390 | H  | -6.908734 | 4.313793  | 1.109352  |
| C | 5.434079  | 0.999292  | -0.686914 | H  | -6.163168 | 4.248832  | 2.715706  |
| H | 4.559687  | 1.563751  | -0.365880 | C  | -1.683041 | 3.339689  | 3.751405  |
| O | 8.815711  | 1.656752  | -1.816164 | H  | -2.434493 | 4.076498  | 4.047685  |
| C | 9.947109  | 0.942397  | -2.254728 | H  | -2.053693 | 2.337654  | 3.993114  |
| H | 10.322629 | 0.257215  | -1.479993 | H  | -0.770988 | 3.504680  | 4.330985  |
| H | 9.735197  | 0.362296  | -3.165514 | C  | -0.980980 | 4.859873  | 1.820996  |
| H | 10.711662 | 1.690622  | -2.474063 | C  | -0.242235 | 5.691968  | 2.665529  |
| C | 4.294966  | -1.720422 | 1.089078  | C  | -1.286617 | 5.316651  | 0.534653  |
| C | 3.719913  | -1.144145 | 2.224777  | C  | 0.177036  | 6.947268  | 2.233642  |
| C | 5.107541  | -2.837547 | 1.283367  | H  | 0.029221  | 5.354419  | 3.663374  |
| C | 3.936596  | -1.651266 | 3.495707  | C  | -0.871155 | 6.571302  | 0.102831  |

|    |           |          |           |
|----|-----------|----------|-----------|
| H  | -1.831327 | 4.678323 | -0.160868 |
| C  | -0.136827 | 7.393113 | 0.952550  |
| H  | 0.756606  | 7.578686 | 2.904890  |
| H  | -1.111420 | 6.894305 | -0.908776 |
| H  | 0.194539  | 8.374331 | 0.617284  |
| H  | -0.674601 | 1.239446 | -0.746861 |
| H  | -0.048094 | 2.812281 | 0.414000  |
| Si | 0.331260  | 2.393135 | -1.094342 |
| O  | 0.996376  | 1.091578 | -2.100016 |
| O  | -0.548428 | 3.407062 | -2.068541 |
| O  | 1.836531  | 3.118012 | -0.938241 |
| C  | 2.067577  | 1.390724 | -3.003889 |
| H  | 3.026842  | 1.391992 | -2.473637 |
| H  | 2.066041  | 0.621708 | -3.786736 |
| H  | 1.902097  | 2.370881 | -3.461775 |
| C  | 1.993450  | 4.387326 | -0.348264 |
| H  | 1.563868  | 5.178319 | -0.980159 |
| H  | 1.522060  | 4.446317 | 0.644309  |
| H  | 3.068952  | 4.574028 | -0.235921 |
| C  | -1.738707 | 2.972222 | -2.693638 |
| H  | -2.173417 | 3.823655 | -3.230750 |
| H  | -1.534523 | 2.166699 | -3.412772 |
| H  | -2.480277 | 2.602237 | -1.968211 |

**TS6d**

M06L SCF energy in Solvent: -7322.527369 a.u.

PBE0-D3BJ Free energy in Solvent: -7321.403081 a.u.

|   |           |          |           |
|---|-----------|----------|-----------|
| O | 0.234993  | 0.896270 | -0.574538 |
| C | 0.505205  | 2.169078 | -0.970184 |
| C | 1.824905  | 2.692862 | -0.972996 |
| C | 2.018885  | 3.983280 | -1.471761 |
| H | 3.038266  | 4.370309 | -1.491001 |
| C | 0.995109  | 4.797759 | -1.951309 |
| C | -0.293092 | 4.281816 | -1.890327 |
| H | -1.137328 | 4.891928 | -2.219900 |
| C | -0.554527 | 3.005157 | -1.395699 |
| C | 1.275431  | 6.169944 | -2.484196 |
| H | 0.356378  | 6.668271 | -2.813714 |
| H | 1.961684  | 6.145845 | -3.341144 |
| H | 1.744492  | 6.812261 | -1.727548 |
| C | 3.074094  | 1.901625 | -0.498207 |
| O | 2.779608  | 1.029883 | 0.557026  |
| C | 4.116530  | 2.900554 | 0.060218  |
| C | 3.823700  | 3.624551 | 1.264542  |

|   |           |           |           |
|---|-----------|-----------|-----------|
| C | 5.322266  | 3.127373  | -0.571885 |
| C | 2.595426  | 3.508806  | 1.967982  |
| C | 4.798336  | 4.542796  | 1.778622  |
| C | 6.281301  | 4.025291  | -0.057388 |
| H | 5.548517  | 2.604518  | -1.499414 |
| C | 2.349482  | 4.244494  | 3.103929  |
| H | 1.850669  | 2.808795  | 1.604884  |
| C | 4.515356  | 5.277006  | 2.956760  |
| C | 6.027338  | 4.716585  | 1.098423  |
| H | 7.222264  | 4.163116  | -0.588231 |
| C | 3.316080  | 5.136010  | 3.610525  |
| H | 1.395219  | 4.134524  | 3.617473  |
| H | 5.274286  | 5.965398  | 3.330308  |
| H | 6.757930  | 5.415292  | 1.506928  |
| H | 3.109576  | 5.710825  | 4.512323  |
| C | 3.666286  | 1.112979  | -1.701304 |
| C | 4.670083  | 0.098355  | -1.493763 |
| C | 3.274465  | 1.386111  | -3.000238 |
| C | 5.223337  | -0.211400 | -0.220126 |
| C | 5.193200  | -0.608706 | -2.631012 |
| C | 3.817296  | 0.712184  | -4.113746 |
| H | 2.529976  | 2.158649  | -3.178827 |
| C | 6.196284  | -1.175093 | -0.079177 |
| H | 4.849717  | 0.319942  | 0.648873  |
| C | 6.173798  | -1.614335 | -2.443264 |
| C | 4.753265  | -0.273161 | -3.934269 |
| H | 3.479539  | 0.977525  | -5.115144 |
| C | 6.670034  | -1.896441 | -1.193842 |
| H | 6.599970  | -1.384456 | 0.910395  |
| H | 6.543193  | -2.144130 | -3.322220 |
| H | 5.175340  | -0.810712 | -4.784258 |
| H | 7.430715  | -2.665701 | -1.064361 |
| O | -3.165583 | -0.290170 | 0.069129  |
| N | -2.364110 | 1.367221  | -1.953917 |
| C | -1.989244 | 2.604158  | -1.242452 |
| H | -2.225609 | 2.441006  | -0.181410 |
| H | -2.645843 | 3.426869  | -1.579700 |
| C | -2.047362 | 1.363918  | -3.387145 |
| H | -2.472601 | 2.264738  | -3.868439 |
| H | -0.960476 | 1.390535  | -3.531622 |
| C | -2.725158 | 0.092879  | -3.865957 |
| H | -2.064662 | -0.767624 | -3.690257 |
| H | -2.945284 | 0.114728  | -4.937876 |
| C | -3.986690 | -0.005997 | -2.990522 |

|    |            |           |           |    |           |           |           |
|----|------------|-----------|-----------|----|-----------|-----------|-----------|
| H  | -4.119867  | -1.011463 | -2.576216 | H  | -2.846520 | -2.496904 | 4.614041  |
| H  | -4.896959  | 0.208720  | -3.560517 | H  | -4.044426 | -1.527871 | 3.729890  |
| C  | -3.804656  | 1.029210  | -1.863897 | H  | -3.665467 | -3.171747 | 3.188999  |
| H  | -4.378147  | 1.943749  | -2.102014 | C  | 0.998591  | -3.458335 | 1.908554  |
| C  | -4.174243  | 0.530325  | -0.420731 | C  | 2.036301  | -3.193773 | 0.786707  |
| C  | -5.487557  | -0.267171 | -0.474099 | O  | 2.609056  | -2.062531 | 0.692517  |
| C  | -6.590013  | 0.138812  | -1.226076 | O  | 2.792525  | -4.312561 | 0.564869  |
| H  | -6.528136  | 1.034553  | -1.846291 | C  | 3.781159  | -4.120053 | -0.459750 |
| C  | -7.786905  | -0.575986 | -1.221925 | H  | 3.257393  | -3.790007 | -1.377207 |
| H  | -8.618848  | -0.229153 | -1.829345 | H  | 4.456959  | -3.308427 | -0.167125 |
| C  | -7.899384  | -1.727253 | -0.439511 | C  | 4.497196  | -5.425034 | -0.669576 |
| C  | -6.806349  | -2.145387 | 0.324599  | H  | 3.809588  | -6.214684 | -0.993857 |
| H  | -6.908698  | -3.043854 | 0.929979  | H  | 5.267748  | -5.305477 | -1.439166 |
| C  | -5.623767  | -1.422732 | 0.302151  | H  | 4.985411  | -5.756214 | 0.253273  |
| H  | -4.771446  | -1.751534 | 0.892835  | C  | 0.331350  | -4.816390 | 1.687155  |
| O  | -9.018272  | -2.501843 | -0.358791 | H  | -0.405422 | -5.026813 | 2.466042  |
| C  | -10.134378 | -2.089752 | -1.113588 | H  | -0.175525 | -4.831141 | 0.714438  |
| H  | -10.482139 | -1.090496 | -0.812636 | H  | 1.084316  | -5.607932 | 1.682516  |
| H  | -9.914035  | -2.077625 | -2.191285 | C  | 1.698192  | -3.334608 | 3.268272  |
| H  | -10.920980 | -2.820462 | -0.915403 | C  | 1.828786  | -4.432677 | 4.120246  |
| C  | -4.415284  | 1.712883  | 0.542819  | C  | 2.211356  | -2.097500 | 3.680205  |
| C  | -3.851953  | 1.676838  | 1.823853  | C  | 2.459729  | -4.301105 | 5.354744  |
| C  | -5.210730  | 2.813333  | 0.222878  | H  | 1.437215  | -5.403081 | 3.825484  |
| C  | -4.051645  | 2.701218  | 2.735034  | C  | 2.839430  | -1.968101 | 4.914363  |
| H  | -3.227869  | 0.825211  | 2.085679  | H  | 2.136096  | -1.229201 | 3.027290  |
| C  | -5.420571  | 3.857678  | 1.122401  | C  | 2.964631  | -3.069101 | 5.757403  |
| H  | -5.694763  | 2.876438  | -0.752200 | H  | 2.551717  | -5.169914 | 6.004334  |
| C  | -4.835124  | 3.806145  | 2.389049  | H  | 3.232079  | -0.998583 | 5.214979  |
| H  | -3.604398  | 2.672230  | 3.726657  | H  | 3.453658  | -2.966125 | 6.724434  |
| H  | -6.040760  | 4.699707  | 0.826221  | H  | 0.937356  | -1.464002 | -1.241849 |
| O  | -4.969510  | 4.767313  | 3.345148  | H  | 1.156647  | -3.262837 | -0.327316 |
| C  | -5.739146  | 5.898950  | 3.008932  | Si | 0.274083  | -2.829862 | -1.646774 |
| H  | -6.780515  | 5.629321  | 2.778844  | O  | -1.257353 | -2.106650 | -1.341854 |
| H  | -5.720542  | 6.549078  | 3.885808  | O  | 0.941619  | -2.792580 | -3.170693 |
| H  | -5.314429  | 6.436676  | 2.148475  | O  | -0.325601 | -4.408557 | -1.708560 |
| Zn | -1.438214  | -0.095881 | -0.709035 | C  | -2.468833 | -2.892365 | -1.328310 |
| Zn | 1.695435   | -0.413663 | 0.085011  | H  | -3.280978 | -2.219351 | -1.046698 |
| C  | -0.074792  | -2.366566 | 1.868021  | H  | -2.634047 | -3.337230 | -2.313847 |
| O  | -0.004987  | -1.287089 | 1.270760  | H  | -2.380695 | -3.695680 | -0.590159 |
| O  | -1.122016  | -2.691606 | 2.600163  | C  | 0.564463  | -5.480183 | -1.914545 |
| C  | -2.173461  | -1.688135 | 2.725695  | H  | 1.280312  | -5.574548 | -1.081031 |
| H  | -1.711177  | -0.783731 | 3.140924  | H  | -0.021720 | -6.404792 | -1.966661 |
| H  | -2.550936  | -1.441668 | 1.726038  | H  | 1.127326  | -5.365857 | -2.852058 |
| C  | -3.236425  | -2.259682 | 3.618662  | C  | 1.731718  | -1.701997 | -3.598352 |



|   |          |           |           |
|---|----------|-----------|-----------|
| H | 2.138036 | -1.944148 | -4.586034 |
| H | 1.143868 | -0.773363 | -3.676461 |
| H | 2.572306 | -1.509062 | -2.916024 |

**IM8a**

M06L SCF energy in Solvent: -7322.588339 a.u.

PBE0-D3BJ Free energy in Solvent: -7321.452437 a.u.

|   |           |           |           |
|---|-----------|-----------|-----------|
| O | 0.545046  | -0.198027 | -0.730105 |
| C | 0.982177  | 0.588475  | -1.723906 |
| C | 2.374670  | 0.721706  | -1.993462 |
| C | 2.761044  | 1.558641  | -3.039285 |
| H | 3.822822  | 1.657285  | -3.264534 |
| C | 1.850133  | 2.263149  | -3.832685 |
| C | 0.495558  | 2.071802  | -3.577807 |
| H | -0.245994 | 2.578246  | -4.201459 |
| C | 0.046850  | 1.247759  | -2.546293 |
| C | 2.324244  | 3.175085  | -4.924111 |
| H | 3.115304  | 2.713734  | -5.528699 |
| H | 2.743289  | 4.109509  | -4.524912 |
| H | 1.507823  | 3.451816  | -5.601606 |
| C | 3.417260  | -0.090182 | -1.186242 |
| O | 3.293072  | 0.159841  | 0.204598  |
| C | 4.860274  | 0.317341  | -1.562215 |
| C | 5.416481  | 1.553117  | -1.091988 |
| C | 5.651503  | -0.502607 | -2.342373 |
| C | 4.667684  | 2.520308  | -0.372652 |
| C | 6.785758  | 1.863056  | -1.385668 |
| C | 6.991331  | -0.185971 | -2.646537 |
| H | 5.238821  | -1.433390 | -2.726270 |
| C | 5.236114  | 3.692883  | 0.067672  |
| H | 3.626084  | 2.303691  | -0.173811 |
| C | 7.345196  | 3.074419  | -0.907145 |
| C | 7.555837  | 0.966074  | -2.162853 |
| H | 7.575653  | -0.871895 | -3.257829 |
| C | 6.594386  | 3.972522  | -0.188770 |
| H | 4.626959  | 4.413379  | 0.615591  |
| H | 8.391037  | 3.283440  | -1.134297 |
| H | 8.595265  | 1.215270  | -2.377339 |
| H | 7.038547  | 4.900624  | 0.167960  |
| C | 3.216353  | -1.604144 | -1.441347 |
| C | 3.838302  | -2.577174 | -0.583433 |
| C | 2.437142  | -2.054520 | -2.489555 |
| C | 4.739908  | -2.242781 | 0.466528  |

|    |           |           |           |
|----|-----------|-----------|-----------|
| C  | 3.572582  | -3.971573 | -0.807466 |
| C  | 2.180957  | -3.422654 | -2.706294 |
| H  | 1.991211  | -1.327827 | -3.166162 |
| C  | 5.310558  | -3.215727 | 1.255539  |
| H  | 4.964356  | -1.196688 | 0.645310  |
| C  | 4.171520  | -4.943940 | 0.033610  |
| C  | 2.729674  | -4.365488 | -1.874743 |
| H  | 1.536914  | -3.722683 | -3.532336 |
| C  | 5.020154  | -4.579492 | 1.049861  |
| H  | 5.998803  | -2.925103 | 2.047920  |
| H  | 3.957214  | -5.995844 | -0.161887 |
| H  | 2.536328  | -5.428026 | -2.025815 |
| H  | 5.476887  | -5.337799 | 1.684068  |
| H  | 1.115500  | -2.656004 | -0.130360 |
| Si | 0.154047  | -3.568966 | 0.487029  |
| O  | -1.303798 | -2.758910 | 0.381757  |
| O  | -0.158653 | -4.987378 | -0.283469 |
| O  | 0.643121  | -3.949962 | 2.011554  |
| C  | -2.515317 | -3.452347 | 0.705406  |
| H  | -2.427790 | -3.941429 | 1.684988  |
| H  | -3.311409 | -2.702456 | 0.735847  |
| H  | -2.729916 | -4.208978 | -0.057997 |
| C  | 1.626083  | -3.203270 | 2.701230  |
| H  | 2.219430  | -3.893013 | 3.311671  |
| H  | 2.322048  | -2.689287 | 2.013968  |
| H  | 1.161682  | -2.448902 | 3.347947  |
| C  | 0.543055  | -6.184947 | -0.016496 |
| H  | 1.577197  | -6.002240 | 0.307406  |
| H  | 0.033368  | -6.757141 | 0.769327  |
| H  | 0.561341  | -6.783451 | -0.934354 |
| O  | -3.171232 | -0.309268 | 0.450399  |
| N  | -1.908479 | -0.233822 | -2.027880 |
| C  | -1.430376 | 1.132408  | -2.297962 |
| H  | -1.727555 | 1.753118  | -1.438493 |
| H  | -1.972163 | 1.540940  | -3.173962 |
| C  | -1.445493 | -1.198626 | -3.035361 |
| H  | -1.588576 | -0.773977 | -4.047902 |
| H  | -0.373026 | -1.385205 | -2.900342 |
| C  | -2.317819 | -2.421417 | -2.815378 |
| H  | -1.836262 | -3.109520 | -2.110298 |
| H  | -2.473843 | -2.976338 | -3.746703 |
| C  | -3.620623 | -1.861057 | -2.228029 |
| H  | -3.884874 | -2.364811 | -1.292441 |
| H  | -4.477389 | -1.998761 | -2.896581 |



|    |           |           |           |   |            |           |           |
|----|-----------|-----------|-----------|---|------------|-----------|-----------|
| H  | 1.059550  | 6.420439  | -2.686317 | H | -3.092367  | -2.522276 | -0.412057 |
| C  | 3.224726  | 1.153490  | -0.900522 | H | -2.494611  | -3.905307 | -1.401165 |
| O  | 3.107620  | 0.506602  | 0.363805  | C | 2.056260   | -4.428753 | -0.501785 |
| C  | 4.619767  | 1.815873  | -0.892984 | H | 2.307715   | -5.164043 | -1.279262 |
| C  | 5.039322  | 2.616652  | 0.222662  | H | 2.740887   | -3.570458 | -0.604664 |
| C  | 5.474699  | 1.682591  | -1.968856 | H | 2.223877   | -4.890495 | 0.478576  |
| C  | 4.211476  | 2.907045  | 1.340360  | C | 0.780006   | -4.604247 | -3.657854 |
| C  | 6.348255  | 3.206444  | 0.199779  | H | 1.865758   | -4.425449 | -3.611452 |
| C  | 6.759225  | 2.262359  | -1.985807 | H | 0.551781   | -5.521065 | -3.096238 |
| H  | 5.155914  | 1.105981  | -2.834663 | H | 0.502467   | -4.757960 | -4.705650 |
| C  | 4.649860  | 3.707034  | 2.369464  | O | -3.210923  | -0.247135 | 0.245923  |
| H  | 3.219594  | 2.469949  | 1.375965  | N | -2.082454  | 1.165030  | -1.857247 |
| C  | 6.773758  | 4.010164  | 1.286267  | C | -1.700884  | 2.479800  | -1.313062 |
| C  | 7.194342  | 2.999950  | -0.915919 | H | -2.031386  | 2.502339  | -0.263843 |
| H  | 7.400133  | 2.114605  | -2.853595 | H | -2.285157  | 3.269425  | -1.824218 |
| C  | 5.946169  | 4.259852  | 2.353010  | C | -1.609317  | 0.958340  | -3.232149 |
| H  | 3.984987  | 3.914386  | 3.207352  | H | -1.819354  | 1.861692  | -3.835204 |
| H  | 7.775822  | 4.438705  | 1.247809  | H | -0.521772  | 0.811949  | -3.221908 |
| H  | 8.187071  | 3.450971  | -0.910848 | C | -2.398218  | -0.247494 | -3.731837 |
| H  | 6.283862  | 4.886072  | 3.177499  | H | -1.800627  | -1.164663 | -3.670754 |
| C  | 3.137623  | 0.091617  | -2.028987 | H | -2.678298  | -0.122392 | -4.783428 |
| C  | 3.891975  | -1.130322 | -1.953643 | C | -3.622708  | -0.326787 | -2.804027 |
| C  | 2.348663  | 0.299561  | -3.144692 | H | -3.596549  | -1.239990 | -2.194894 |
| C  | 4.822126  | -1.413521 | -0.916634 | H | -4.572810  | -0.341406 | -3.346994 |
| C  | 3.758158  | -2.102198 | -3.004951 | C | -3.533407  | 0.887697  | -1.873717 |
| C  | 2.200930  | -0.664390 | -4.161207 | H | -4.054991  | 1.753750  | -2.323282 |
| H  | 1.808367  | 1.238176  | -3.246127 | C | -4.079156  | 0.599539  | -0.428756 |
| C  | 5.563969  | -2.574532 | -0.917247 | C | -5.455075  | -0.074834 | -0.559563 |
| H  | 4.934868  | -0.695941 | -0.109819 | C | -6.444905  | 0.417685  | -1.409793 |
| C  | 4.523885  | -3.294810 | -2.960695 | H | -6.247629  | 1.298973  | -2.022109 |
| C  | 2.885550  | -1.849876 | -4.091054 | C | -7.693865  | -0.190674 | -1.516366 |
| H  | 1.539980  | -0.457218 | -5.002286 | H | -8.433001  | 0.220471  | -2.199323 |
| C  | 5.413557  | -3.531956 | -1.940836 | C | -7.975387  | -1.318713 | -0.742849 |
| H  | 6.279623  | -2.751820 | -0.114375 | C | -6.998993  | -1.817976 | 0.123400  |
| H  | 4.405103  | -4.013882 | -3.773221 | H | -7.237174  | -2.694726 | 0.722465  |
| H  | 2.788577  | -2.601978 | -4.874863 | C | -5.758613  | -1.202661 | 0.209201  |
| H  | 6.007065  | -4.444826 | -1.928090 | H | -4.996829  | -1.588120 | 0.883633  |
| H  | 1.190806  | -1.741502 | -1.620844 | O | -9.160940  | -1.994924 | -0.762538 |
| Si | 0.253951  | -2.865483 | -1.665285 | C | -10.164103 | -1.498760 | -1.616463 |
| O  | -1.234258 | -2.255300 | -1.230744 | H | -10.451335 | -0.469710 | -1.353334 |
| O  | 0.039903  | -3.506681 | -3.168299 | H | -9.849517  | -1.517191 | -2.670824 |
| O  | 0.695239  | -4.037710 | -0.582764 | H | -11.025473 | -2.157603 | -1.486879 |
| C  | -2.225590 | -3.140828 | -0.663378 | C | -4.287081  | 1.903030  | 0.371338  |
| H  | -1.832119 | -3.598023 | 0.249992  | C | -3.937038  | 1.925922  | 1.726517  |

|    |           |           |           |
|----|-----------|-----------|-----------|
| C  | -4.834996 | 3.067915  | -0.166986 |
| C  | -4.084882 | 3.068174  | 2.498082  |
| H  | -3.530867 | 1.014368  | 2.160477  |
| C  | -4.990015 | 4.228991  | 0.589695  |
| H  | -5.146524 | 3.099078  | -1.211025 |
| C  | -4.606208 | 4.235447  | 1.931924  |
| H  | -3.808144 | 3.080753  | 3.551029  |
| H  | -5.409337 | 5.117057  | 0.123446  |
| O  | -4.703741 | 5.313554  | 2.761806  |
| C  | -5.226276 | 6.498302  | 2.207042  |
| H  | -6.256352 | 6.359033  | 1.846679  |
| H  | -5.221888 | 7.237194  | 3.010933  |
| H  | -4.607726 | 6.863612  | 1.373695  |
| Zn | 1.478487  | -0.243502 | 0.768977  |
| Zn | -1.396081 | -0.269930 | -0.341747 |
| C  | -0.580126 | -3.062550 | 3.214134  |
| O  | -1.713083 | -3.161331 | 2.790893  |
| O  | 0.184982  | -4.116511 | 3.546053  |
| C  | -0.379298 | -5.404560 | 3.225688  |
| H  | -0.541002 | -5.441026 | 2.139505  |
| H  | -1.361378 | -5.491035 | 3.705098  |
| C  | 0.597054  | -6.446831 | 3.696709  |
| H  | 1.572917  | -6.315482 | 3.216237  |
| H  | 0.227842  | -7.449287 | 3.455826  |
| H  | 0.744390  | -6.387774 | 4.780180  |
| C  | 0.105783  | -1.727474 | 3.509230  |
| C  | -0.467310 | -0.728278 | 2.470341  |
| O  | -0.232618 | -1.140438 | 1.177637  |
| O  | 0.227587  | 0.520466  | 2.680586  |
| C  | -0.574465 | 1.672724  | 2.396010  |
| H  | -1.321634 | 1.786380  | 3.197762  |
| H  | -1.135367 | 1.511879  | 1.458050  |
| C  | 0.314734  | 2.879716  | 2.282808  |
| H  | 0.886019  | 3.037635  | 3.204913  |
| H  | -0.291752 | 3.772226  | 2.088857  |
| H  | 1.023194  | 2.771553  | 1.450854  |
| C  | -0.353914 | -1.298707 | 4.906492  |
| H  | 0.088284  | -1.932321 | 5.683372  |
| H  | -1.445020 | -1.370292 | 4.980371  |
| H  | -0.072136 | -0.258611 | 5.099517  |
| C  | 1.615981  | -1.770468 | 3.356222  |
| C  | 2.464229  | -1.025885 | 4.180397  |
| C  | 2.193751  | -2.483928 | 2.291842  |
| C  | 3.839256  | -0.997758 | 3.957967  |

|   |           |           |          |
|---|-----------|-----------|----------|
| H | 2.050096  | -0.447431 | 5.003177 |
| C | 3.570004  | -2.468242 | 2.078555 |
| H | 1.548982  | -3.078644 | 1.647178 |
| C | 4.398308  | -1.718590 | 2.907964 |
| H | 4.475218  | -0.400284 | 4.608569 |
| H | 3.991962  | -3.031689 | 1.248236 |
| H | 5.472324  | -1.689795 | 2.730668 |
| H | -1.546636 | -0.584878 | 2.645423 |

### TS7a

M06L SCF energy in Solvent: -7322.554985 a.u.

PBE0-D3BJ Free energy in Solvent: -7321.435275 a.u.

|   |           |          |           |
|---|-----------|----------|-----------|
| O | 0.540695  | 0.717872 | -0.562010 |
| C | 1.014358  | 1.915519 | -0.970914 |
| C | 2.412466  | 2.149058 | -1.022028 |
| C | 2.848950  | 3.381141 | -1.513007 |
| H | 3.920498  | 3.560553 | -1.591775 |
| C | 1.981817  | 4.391988 | -1.933234 |
| C | 0.616160  | 4.141144 | -1.849425 |
| H | -0.094892 | 4.909910 | -2.161822 |
| C | 0.119307  | 2.932119 | -1.365210 |
| C | 2.512044  | 5.698717 | -2.441671 |
| H | 3.296450  | 5.556090 | -3.195781 |
| H | 2.958617  | 6.298150 | -1.636725 |
| H | 1.720329  | 6.304807 | -2.897059 |
| C | 3.428685  | 1.034151 | -0.666889 |
| O | 3.179045  | 0.413798 | 0.585520  |
| C | 4.842200  | 1.647448 | -0.525021 |
| C | 5.142050  | 2.510965 | 0.582450  |
| C | 5.833586  | 1.396921 | -1.452275 |
| C | 4.178540  | 2.931938 | 1.537314  |
| C | 6.473595  | 3.027426 | 0.721600  |
| C | 7.137832  | 1.915681 | -1.317257 |
| H | 5.612623  | 0.771950 | -2.314697 |
| C | 4.510463  | 3.771305 | 2.574886  |
| H | 3.155746  | 2.584887 | 1.434272  |
| C | 6.786347  | 3.876595 | 1.812391  |
| C | 7.457892  | 2.702910 | -0.241858 |
| H | 7.886765  | 1.678668 | -2.071341 |
| C | 5.830171  | 4.241436 | 2.726961  |
| H | 3.742300  | 4.078858 | 3.283660  |
| H | 7.808843  | 4.245416 | 1.900620  |
| H | 8.464326  | 3.103496 | -0.117854 |
| H | 6.084115  | 4.898350 | 3.557515  |

|    |           |           |           |    |            |           |           |
|----|-----------|-----------|-----------|----|------------|-----------|-----------|
| C  | 3.407247  | -0.030927 | -1.791508 | H  | -2.785616  | 0.787376  | -4.980796 |
| C  | 4.083007  | -1.289230 | -1.632662 | C  | -3.663548  | 0.431198  | -2.986405 |
| C  | 2.783992  | 0.225946  | -2.999459 | H  | -3.730765  | -0.571160 | -2.543954 |
| C  | 4.901413  | -1.603938 | -0.513546 | H  | -4.627593  | 0.622459  | -3.467590 |
| C  | 4.012021  | -2.256559 | -2.693502 | C  | -3.388008  | 1.452356  | -1.875636 |
| C  | 2.712799  | -0.727241 | -4.033249 | H  | -3.834310  | 2.431446  | -2.133584 |
| H  | 2.316638  | 1.194265  | -3.161421 | C  | -3.872064  | 0.988482  | -0.452089 |
| C  | 5.599056  | -2.788790 | -0.449890 | C  | -5.309014  | 0.449436  | -0.569441 |
| H  | 4.966445  | -0.886971 | 0.298585  | C  | -6.298592  | 1.078519  | -1.324674 |
| C  | 4.702757  | -3.488611 | -2.567213 | H  | -6.061981  | 1.977306  | -1.895771 |
| C  | 3.291307  | -1.959997 | -3.873835 | C  | -7.599073  | 0.581081  | -1.396046 |
| H  | 2.169569  | -0.488434 | -4.946327 | H  | -8.336727  | 1.097633  | -2.005197 |
| C  | 5.489081  | -3.752879 | -1.472769 | C  | -7.933110  | -0.573671 | -0.686308 |
| H  | 6.239540  | -2.988387 | 0.408908  | C  | -6.955170  | -1.214818 | 0.079141  |
| H  | 4.616795  | -4.212254 | -3.379321 | H  | -7.231270  | -2.113971 | 0.626442  |
| H  | 3.220597  | -2.718291 | -4.654112 | C  | -5.666264  | -0.706980 | 0.132287  |
| H  | 6.035507  | -4.692356 | -1.400422 | H  | -4.901513  | -1.207553 | 0.722310  |
| H  | 1.139252  | -1.611509 | -1.897251 | O  | -9.170999  | -1.148230 | -0.681724 |
| Si | 0.099951  | -2.536843 | -2.325178 | C  | -10.174488 | -0.502524 | -1.429085 |
| O  | -1.390095 | -1.894982 | -1.893708 | H  | -10.349914 | 0.523599  | -1.073077 |
| O  | 0.162923  | -2.673712 | -3.970522 | H  | -9.925602  | -0.466039 | -2.500316 |
| O  | 0.169388  | -4.017797 | -1.597669 | H  | -11.083059 | -1.092308 | -1.290773 |
| C  | -2.466742 | -2.747139 | -1.439553 | C  | -3.904186  | 2.175827  | 0.534104  |
| H  | -2.104386 | -3.448127 | -0.683913 | C  | -3.306816  | 2.051088  | 1.794196  |
| H  | -3.223591 | -2.090550 | -0.999712 | C  | -4.525743  | 3.389055  | 0.236744  |
| H  | -2.883157 | -3.290974 | -2.296213 | C  | -3.314356  | 3.095639  | 2.706130  |
| C  | 1.361132  | -4.777756 | -1.709567 | H  | -2.809787  | 1.113897  | 2.042036  |
| H  | 1.509411  | -5.141189 | -2.737913 | C  | -4.541305  | 4.452753  | 1.136949  |
| H  | 2.248230  | -4.192518 | -1.422228 | H  | -5.020353  | 3.529604  | -0.724478 |
| H  | 1.276161  | -5.640112 | -1.040042 | C  | -3.929832  | 4.308226  | 2.383845  |
| C  | -0.825271 | -3.409456 | -4.665551 | H  | -2.843627  | 2.997140  | 3.682752  |
| H  | -0.946722 | -4.423253 | -4.255027 | H  | -5.033013  | 5.381778  | 0.858786  |
| H  | -1.800013 | -2.900504 | -4.631461 | O  | -3.881262  | 5.278795  | 3.340622  |
| H  | -0.514684 | -3.492508 | -5.711631 | C  | -4.492682  | 6.509347  | 3.031084  |
| O  | -3.047732 | -0.017871 | 0.022479  | H  | -5.570101  | 6.392056  | 2.841738  |
| N  | -1.910789 | 1.591039  | -1.934637 | H  | -4.347786  | 7.148044  | 3.904871  |
| C  | -1.362583 | 2.757810  | -1.212357 | H  | -4.029547  | 6.984572  | 2.153498  |
| H  | -1.620861 | 2.632903  | -0.151519 | Zn | -1.282064  | -0.057850 | -0.696415 |
| H  | -1.885921 | 3.670478  | -1.553183 | Zn | 1.461261   | 0.059130  | 1.138056  |
| C  | -1.576734 | 1.598842  | -3.366247 | C  | -1.193197  | -3.772689 | 2.633452  |
| H  | -1.795423 | 2.598508  | -3.786889 | O  | -1.939739  | -3.978763 | 1.697788  |
| H  | -0.503346 | 1.414877  | -3.501737 | O  | -0.882877  | -4.690168 | 3.560788  |
| C  | -2.478266 | 0.526966  | -3.962482 | C  | -1.474120  | -5.991660 | 3.354358  |
| H  | -1.944716 | -0.428327 | -4.019917 | H  | -1.156690  | -6.359759 | 2.371110  |

|   |           |           |          |   |           |           |           |
|---|-----------|-----------|----------|---|-----------|-----------|-----------|
| H | -2.564053 | -5.877424 | 3.321521 | C | -2.660232 | 3.020028  | 4.483469  |
| C | -1.015639 | -6.875563 | 4.480580 | H | -3.172650 | 2.378321  | 5.214010  |
| H | 0.075847  | -6.958769 | 4.495862 | H | -3.402796 | 3.746095  | 4.129685  |
| H | -1.434665 | -7.880535 | 4.364565 | H | -1.887467 | 3.573904  | 5.029188  |
| H | -1.340790 | -6.480446 | 5.448640 | C | -3.320058 | 0.458638  | 0.144951  |
| C | -0.498249 | -2.437902 | 2.929288 | O | -2.740544 | 0.775106  | -1.123800 |
| C | -0.983187 | -1.494627 | 1.827419 | C | -4.660099 | 1.224582  | 0.169365  |
| O | -0.462389 | -1.488687 | 0.700094 | C | -4.706429 | 2.625947  | -0.143257 |
| O | 0.169579  | 0.194662  | 2.511056 | C | -5.837386 | 0.578528  | 0.491201  |
| C | -0.001046 | 1.419386  | 3.175938 | C | -3.555805 | 3.410540  | -0.422422 |
| H | -0.875445 | 1.327878  | 3.845694 | C | -5.978047 | 3.291795  | -0.140011 |
| H | -0.252059 | 2.229431  | 2.462258 | C | -7.082558 | 1.238959  | 0.492832  |
| C | 1.226518  | 1.792989  | 3.984124 | H | -5.817024 | -0.476456 | 0.753009  |
| H | 1.416251  | 1.053304  | 4.771993 | C | -3.656789 | 4.755068  | -0.697044 |
| H | 1.118983  | 2.778582  | 4.454778 | H | -2.583198 | 2.929613  | -0.424283 |
| H | 2.120177  | 1.820100  | 3.342815 | C | -6.045332 | 4.674638  | -0.438505 |
| C | -0.993770 | -1.938096 | 4.286845 | C | -7.153636 | 2.569280  | 0.174291  |
| H | -0.696003 | -2.623097 | 5.085787 | H | -7.982029 | 0.680447  | 0.746447  |
| H | -2.088143 | -1.862817 | 4.291203 | C | -4.910946 | 5.397338  | -0.714265 |
| H | -0.588265 | -0.943478 | 4.489302 | H | -2.754405 | 5.327524  | -0.906307 |
| C | 1.009258  | -2.617126 | 2.837492 | H | -7.024464 | 5.154859  | -0.437149 |
| C | 1.875983  | -2.045973 | 3.771362 | H | -8.108665 | 3.095426  | 0.166204  |
| C | 1.554317  | -3.317332 | 1.752304 | H | -4.976766 | 6.460846  | -0.939261 |
| C | 3.255608  | -2.162317 | 3.623645 | C | -3.579662 | -1.060698 | 0.255763  |
| H | 1.473707  | -1.487417 | 4.613055 | C | -4.038699 | -1.830861 | -0.871609 |
| C | 2.932945  | -3.439653 | 1.609046 | C | -3.412926 | -1.702965 | 1.466860  |
| H | 0.888678  | -3.751892 | 1.005825 | C | -4.391122 | -1.266713 | -2.131559 |
| C | 3.787034  | -2.857966 | 2.542488 | C | -4.200355 | -3.251170 | -0.720798 |
| H | 3.915604  | -1.696798 | 4.353549 | C | -3.629729 | -3.087017 | 1.622046  |
| H | 3.345931  | -3.978353 | 0.757106 | H | -3.079021 | -1.128442 | 2.328262  |
| H | 4.865362  | -2.939256 | 2.420245 | C | -4.799609 | -2.058365 | -3.181579 |
| H | -1.958213 | -1.000188 | 1.986205 | H | -4.337287 | -0.190630 | -2.253179 |

### IM10

M06L SCF energy in Solvent: -6631.659759 a.u.

PBE0-D3BJ Free energy in Solvent: -6630.756992 a.u.

|   |           |           |          |    |           |           |           |
|---|-----------|-----------|----------|----|-----------|-----------|-----------|
| O | -0.512819 | -0.251944 | 0.394064 | C  | -4.888431 | -3.457525 | -3.043414 |
| C | -1.008322 | 0.618744  | 1.294197 | H  | -5.068148 | -1.591733 | -4.128172 |
| C | -2.393295 | 0.929402  | 1.296695 | H  | -4.704600 | -5.112027 | -1.689032 |
| C | -2.887974 | 1.703461  | 2.346502 | H  | -4.133554 | -4.930610 | 0.641847  |
| H | -3.955750 | 1.920231  | 2.376413 | H  | -5.203213 | -4.071552 | -3.885529 |
| C | -2.075015 | 2.227556  | 3.353790 | H  | -1.423568 | -2.744972 | -0.305607 |
| C | -0.703801 | 2.010349  | 3.248541 | Si | -0.485336 | -3.433455 | 0.579246  |
| H | -0.030010 | 2.473409  | 3.973755 | O  | 1.104942  | -3.005391 | 0.198040  |
| C | -0.149709 | 1.242108  | 2.224640 | O  | -0.630752 | -3.008338 | 2.154544  |

|    |           |           |           |
|----|-----------|-----------|-----------|
| O  | -0.614988 | -5.066590 | 0.401728  |
| C  | 1.801364  | -3.672871 | -0.864221 |
| H  | 1.218889  | -3.639472 | -1.794188 |
| H  | 2.746230  | -3.140391 | -1.010254 |
| H  | 1.987247  | -4.714067 | -0.579515 |
| C  | -1.237022 | -5.669106 | -0.715650 |
| H  | -0.478331 | -6.075813 | -1.397800 |
| H  | -1.869474 | -6.493414 | -0.366344 |
| H  | -1.870334 | -4.961458 | -1.272694 |
| C  | -0.181724 | -3.861336 | 3.191258  |
| H  | -0.852405 | -4.723109 | 3.305590  |
| H  | 0.836708  | -4.234241 | 3.009062  |
| H  | -0.179942 | -3.284721 | 4.122206  |
| Zn | 1.342622  | -0.867536 | -0.057718 |
| O  | 3.154575  | -0.757487 | -0.626913 |
| N  | 2.026953  | -0.009253 | 1.850358  |
| C  | 1.342753  | 1.285711  | 2.027567  |
| H  | 1.559707  | 1.895777  | 1.143385  |
| H  | 1.803701  | 1.811704  | 2.886121  |
| C  | 1.869245  | -0.854533 | 3.044537  |
| H  | 2.088349  | -0.252885 | 3.948470  |
| H  | 0.832670  | -1.204635 | 3.114794  |
| C  | 2.902748  | -1.942409 | 2.847010  |
| H  | 2.505458  | -2.705666 | 2.167379  |
| H  | 3.171507  | -2.439157 | 3.786177  |
| C  | 4.077244  | -1.207030 | 2.192208  |
| H  | 4.539978  | -1.807863 | 1.401970  |
| H  | 4.862741  | -0.975786 | 2.921205  |
| C  | 3.497749  | 0.095797  | 1.605324  |
| H  | 3.870962  | 0.975845  | 2.159909  |
| C  | 3.809795  | 0.246687  | 0.070522  |
| C  | 5.319118  | 0.115753  | -0.163085 |
| C  | 6.285909  | 0.541138  | 0.746670  |
| H  | 5.987560  | 0.960623  | 1.708403  |
| C  | 7.650649  | 0.426475  | 0.477382  |
| H  | 8.371528  | 0.760448  | 1.219432  |
| C  | 8.067948  | -0.121495 | -0.735691 |
| C  | 7.110777  | -0.548464 | -1.662316 |
| H  | 7.454514  | -0.975603 | -2.602381 |
| C  | 5.761950  | -0.429632 | -1.374344 |
| H  | 5.013478  | -0.773945 | -2.084637 |
| O  | 9.371675  | -0.289183 | -1.102117 |
| C  | 10.349358 | 0.120264  | -0.175215 |
| H  | 10.284084 | 1.198024  | 0.036438  |

|    |           |           |           |
|----|-----------|-----------|-----------|
| H  | 10.265844 | -0.430111 | 0.773909  |
| H  | 11.315247 | -0.098492 | -0.635490 |
| C  | 3.369858  | 1.642746  | -0.415453 |
| C  | 2.378966  | 1.782542  | -1.393923 |
| C  | 3.902530  | 2.812424  | 0.129021  |
| C  | 1.907690  | 3.030476  | -1.779396 |
| H  | 1.969928  | 0.886751  | -1.859518 |
| C  | 3.449969  | 4.074139  | -0.246970 |
| H  | 4.698437  | 2.745788  | 0.871964  |
| C  | 2.437057  | 4.188265  | -1.203926 |
| H  | 1.131768  | 3.136651  | -2.535701 |
| H  | 3.891973  | 4.958559  | 0.205293  |
| O  | 1.917475  | 5.368105  | -1.643134 |
| C  | 2.445196  | 6.547697  | -1.080486 |
| H  | 3.521208  | 6.649189  | -1.285268 |
| H  | 1.908912  | 7.373410  | -1.552220 |
| H  | 2.286518  | 6.585522  | 0.007324  |
| Zn | -1.275430 | -0.255073 | -1.475890 |
| O  | 0.285999  | -1.144355 | -1.954168 |
| C  | 0.880978  | -1.144599 | -3.235895 |
| H  | 1.964117  | -0.981766 | -3.106830 |
| H  | 0.756797  | -2.141532 | -3.694460 |
| C  | 0.290761  | -0.089106 | -4.142859 |
| H  | 0.740288  | -0.108040 | -5.143248 |
| H  | -0.792136 | -0.245642 | -4.263815 |
| H  | 0.444852  | 0.915957  | -3.726844 |

### IM11

M06L SCF energy in Solvent: -6631.658363 a.u.

PBE0-D3BJ Free energy in Solvent: -6630.754612 a.u.

|   |          |          |           |
|---|----------|----------|-----------|
| O | 0.631260 | 0.465718 | -0.013255 |
| C | 1.197168 | 1.404568 | -0.795237 |
| C | 2.600927 | 1.450178 | -0.999942 |
| C | 3.105726 | 2.477313 | -1.798268 |
| H | 4.180219 | 2.521649 | -1.974377 |
| C | 2.297615 | 3.435242 | -2.417360 |
| C | 0.918483 | 3.304874 | -2.272868 |
| H | 0.253210 | 3.993435 | -2.799555 |
| C | 0.356423 | 2.306198 | -1.479957 |
| C | 2.898818 | 4.545465 | -3.224476 |
| H | 3.790708 | 4.215832 | -3.770820 |
| H | 3.213043 | 5.385338 | -2.589183 |
| H | 2.187353 | 4.947470 | -3.955565 |
| C | 3.510688 | 0.290691 | -0.520284 |

|    |           |           |           |    |            |           |           |
|----|-----------|-----------|-----------|----|------------|-----------|-----------|
| O  | 3.322042  | 0.009522  | 0.858619  | C  | -1.754339  | -0.811269 | -3.572389 |
| C  | 4.998754  | 0.643135  | -0.701058 | H  | -1.288616  | -1.654683 | -3.039199 |
| C  | 5.615745  | 1.630867  | 0.137053  | H  | -1.717003  | -1.045290 | -4.641646 |
| C  | 5.762973  | 0.026326  | -1.671575 | C  | -3.169795  | -0.558819 | -3.046990 |
| C  | 4.909435  | 2.385218  | 1.111363  | H  | -3.588880  | -1.448961 | -2.567180 |
| C  | 7.012664  | 1.911895  | -0.037709 | H  | -3.856518  | -0.277082 | -3.853216 |
| C  | 7.134667  | 0.304448  | -1.837810 | C  | -3.045240  | 0.593526  | -2.028084 |
| H  | 5.301771  | -0.703632 | -2.333238 | H  | -3.486131  | 1.517712  | -2.439889 |
| C  | 5.544386  | 3.340285  | 1.871420  | C  | -3.700236  | 0.228326  | -0.653989 |
| H  | 3.852303  | 2.189886  | 1.257294  | C  | -5.123933  | -0.288539 | -0.905242 |
| C  | 7.635895  | 2.891157  | 0.773054  | C  | -6.024091  | 0.367941  | -1.743608 |
| C  | 7.751380  | 1.222235  | -1.029204 | H  | -5.721868  | 1.274309  | -2.270586 |
| H  | 7.695353  | -0.217570 | -2.611418 | C  | -7.320310  | -0.105063 | -1.942777 |
| C  | 6.921227  | 3.594735  | 1.711204  | H  | -7.989041  | 0.432138  | -2.610462 |
| H  | 4.974692  | 3.905664  | 2.607651  | C  | -7.739131  | -1.260583 | -1.280371 |
| H  | 8.699608  | 3.081164  | 0.626364  | C  | -6.849352  | -1.926973 | -0.433229 |
| H  | 8.812364  | 1.446913  | -1.141994 | H  | -7.191533  | -2.827452 | 0.073066  |
| H  | 7.411472  | 4.349755  | 2.324008  | C  | -5.561922  | -1.445525 | -0.253424 |
| C  | 3.149171  | -0.979653 | -1.342736 | H  | -4.862799  | -1.965652 | 0.396962  |
| C  | 3.583668  | -2.284361 | -0.913290 | O  | -8.981808  | -1.812393 | -1.396636 |
| C  | 2.401306  | -0.893057 | -2.503224 | C  | -9.893276  | -1.155340 | -2.245296 |
| C  | 4.472452  | -2.497437 | 0.179654  | H  | -10.091813 | -0.126177 | -1.910780 |
| C  | 3.155369  | -3.440567 | -1.652863 | H  | -9.533262  | -1.124464 | -3.284651 |
| C  | 1.982972  | -2.029599 | -3.224185 | H  | -10.818719 | -1.733434 | -2.202807 |
| H  | 2.128678  | 0.090918  | -2.878899 | C  | -3.818586  | 1.452231  | 0.274288  |
| C  | 4.879786  | -3.764698 | 0.531191  | C  | -3.586507  | 1.298690  | 1.647659  |
| H  | 4.830512  | -1.635925 | 0.733076  | C  | -4.218323  | 2.713953  | -0.170593 |
| C  | 3.583982  | -4.729330 | -1.249121 | C  | -3.716702  | 2.362353  | 2.527525  |
| C  | 2.335460  | -3.284060 | -2.796045 | H  | -3.307653  | 0.314566  | 2.019779  |
| H  | 1.383819  | -1.900447 | -4.125239 | C  | -4.348067  | 3.797089  | 0.696365  |
| C  | 4.426628  | -4.895317 | -0.178123 | H  | -4.433504  | 2.882121  | -1.226169 |
| H  | 5.569677  | -3.891665 | 1.363990  | C  | -4.092945  | 3.623924  | 2.058261  |
| H  | 3.238691  | -5.589877 | -1.822933 | H  | -3.539997  | 2.238271  | 3.594172  |
| H  | 2.018227  | -4.174141 | -3.339724 | H  | -4.651764  | 4.763370  | 0.301577  |
| H  | 4.752918  | -5.891414 | 0.116267  | O  | -4.189710  | 4.607593  | 2.996105  |
| Zn | -1.105297 | -0.465758 | -0.202618 | C  | -4.589600  | 5.881458  | 2.545675  |
| O  | -2.951211 | -0.780714 | -0.053453 | H  | -5.588233  | 5.854066  | 2.085272  |
| N  | -1.572938 | 0.806779  | -1.905261 | H  | -4.617276  | 6.520468  | 3.430569  |
| C  | -1.136445 | 2.141248  | -1.419002 | H  | -3.876483  | 6.298438  | 1.819126  |
| H  | -1.511904 | 2.257021  | -0.392601 | O  | -0.038022  | -1.932036 | 0.861309  |
| H  | -1.627127 | 2.925760  | -2.023437 | Si | -0.671618  | -1.463784 | 2.752490  |
| C  | -1.020525 | 0.464341  | -3.225253 | H  | -1.088994  | -0.234889 | 2.029767  |
| H  | -1.243232 | 1.273882  | -3.946346 | O  | -1.409118  | -2.942025 | 2.703811  |
| H  | 0.067382  | 0.361118  | -3.165305 | C  | -2.352282  | -3.375498 | 3.665854  |



|    |           |           |           |
|----|-----------|-----------|-----------|
| H  | -2.748724 | -4.335978 | 3.319356  |
| H  | -1.892295 | -3.509685 | 4.652223  |
| H  | -3.180027 | -2.663686 | 3.770712  |
| O  | -1.184768 | -0.991676 | 4.295485  |
| C  | -1.189861 | 0.358073  | 4.674325  |
| H  | -0.325651 | 0.598270  | 5.313887  |
| H  | -1.168263 | 1.040774  | 3.806523  |
| H  | -2.102233 | 0.570147  | 5.247458  |
| C  | 0.046944  | -3.275263 | 0.351647  |
| H  | 0.335526  | -3.197015 | -0.708575 |
| H  | -0.955519 | -3.715391 | 0.409601  |
| Zn | 1.703456  | -0.861636 | 1.097776  |
| O  | 1.051260  | -1.409843 | 2.973987  |
| C  | 1.705036  | -1.088171 | 4.200521  |
| H  | 2.662622  | -1.617373 | 4.217026  |
| H  | 1.892641  | -0.009431 | 4.263631  |
| H  | 1.089406  | -1.403931 | 5.046798  |
| C  | 1.052299  | -4.100922 | 1.113218  |
| H  | 0.742456  | -4.230414 | 2.154560  |
| H  | 1.163297  | -5.090239 | 0.654029  |
| H  | 2.046673  | -3.628037 | 1.102321  |

**TS8**

M06L SCF energy in Solvent: -6631.644986 a.u.

PBE0-D3BJ Free energy in Solvent: -6630.738982 a.u.

|   |          |           |           |
|---|----------|-----------|-----------|
| O | 0.589126 | 0.417551  | -0.106297 |
| C | 1.138875 | 1.447320  | -0.783722 |
| C | 2.545779 | 1.547965  | -0.910741 |
| C | 3.057565 | 2.637083  | -1.615629 |
| H | 4.136986 | 2.720923  | -1.736026 |
| C | 2.249669 | 3.609349  | -2.211931 |
| C | 0.870576 | 3.440667  | -2.128414 |
| H | 0.209328 | 4.154180  | -2.625930 |
| C | 0.299009 | 2.380328  | -1.425368 |
| C | 2.854146 | 4.779373  | -2.927176 |
| H | 3.737160 | 4.489800  | -3.509751 |
| H | 3.184048 | 5.557432  | -2.224969 |
| H | 2.139318 | 5.248191  | -3.613506 |
| C | 3.462374 | 0.383703  | -0.458904 |
| O | 3.227013 | -0.001105 | 0.885196  |
| C | 4.942505 | 0.812017  | -0.516166 |
| C | 5.447559 | 1.766771  | 0.429193  |
| C | 5.800491 | 0.308876  | -1.473438 |
| C | 4.637008 | 2.411143  | 1.401116  |

|    |           |           |           |
|----|-----------|-----------|-----------|
| C  | 6.834938  | 2.128158  | 0.376724  |
| C  | 7.162442  | 0.671183  | -1.523566 |
| H  | 5.423343  | -0.392406 | -2.214989 |
| C  | 5.166189  | 3.330292  | 2.277555  |
| H  | 3.584321  | 2.155573  | 1.453798  |
| C  | 7.348370  | 3.068386  | 1.303598  |
| C  | 7.673563  | 1.554897  | -0.608617 |
| H  | 7.802035  | 0.238898  | -2.291442 |
| C  | 6.535809  | 3.659160  | 2.239574  |
| H  | 4.517129  | 3.807080  | 3.010637  |
| H  | 8.408288  | 3.319037  | 1.250386  |
| H  | 8.725705  | 1.839485  | -0.630448 |
| H  | 6.943419  | 4.382528  | 2.944046  |
| C  | 3.203951  | -0.823396 | -1.405044 |
| C  | 3.693082  | -2.136744 | -1.079899 |
| C  | 2.510018  | -0.663797 | -2.591501 |
| C  | 4.482287  | -2.422477 | 0.070346  |
| C  | 3.404611  | -3.228446 | -1.971145 |
| C  | 2.212245  | -1.740973 | -3.450199 |
| H  | 2.181687  | 0.331525  | -2.883335 |
| C  | 4.922894  | -3.700182 | 0.334539  |
| H  | 4.727163  | -1.610935 | 0.747789  |
| C  | 3.879592  | -4.527789 | -1.665903 |
| C  | 2.643379  | -3.005253 | -3.141931 |
| H  | 1.645428  | -1.555158 | -4.362413 |
| C  | 4.615982  | -4.768469 | -0.532825 |
| H  | 5.526058  | -3.883723 | 1.222761  |
| H  | 3.641632  | -5.337972 | -2.356195 |
| H  | 2.424227  | -3.851115 | -3.794049 |
| H  | 4.970927  | -5.773237 | -0.309381 |
| Zn | -1.173653 | -0.384641 | -0.229539 |
| O  | -3.000626 | -0.763433 | -0.051868 |
| N  | -1.670357 | 0.920987  | -1.868916 |
| C  | -1.198497 | 2.241167  | -1.384673 |
| H  | -1.571389 | 2.369809  | -0.360360 |
| H  | -1.664816 | 3.038682  | -1.991152 |
| C  | -1.131442 | 0.563952  | -3.190338 |
| H  | -1.329893 | 1.378713  | -3.912201 |
| H  | -0.045993 | 0.428465  | -3.127931 |
| C  | -1.901916 | -0.690260 | -3.533928 |
| H  | -1.465297 | -1.545361 | -2.994977 |
| H  | -1.870718 | -0.931605 | -4.601520 |
| C  | -3.310190 | -0.391094 | -3.014539 |
| H  | -3.778571 | -1.276109 | -2.571957 |

|    |            |           |           |
|----|------------|-----------|-----------|
| H  | -3.966013  | -0.048817 | -3.823380 |
| C  | -3.147764  | 0.718693  | -1.953664 |
| H  | -3.603209  | 1.663768  | -2.297261 |
| C  | -3.747535  | 0.296860  | -0.565292 |
| C  | -5.199421  | -0.157070 | -0.733243 |
| C  | -6.071813  | 0.376199  | -1.680101 |
| H  | -5.720286  | 1.123362  | -2.393183 |
| C  | -7.403515  | -0.032919 | -1.763063 |
| H  | -8.049616  | 0.399839  | -2.522753 |
| C  | -7.884287  | -0.994083 | -0.873327 |
| C  | -7.021743  | -1.535563 | 0.085687  |
| H  | -7.413098  | -2.284882 | 0.770596  |
| C  | -5.702949  | -1.120286 | 0.149880  |
| H  | -5.026936  | -1.545830 | 0.888152  |
| O  | -9.162988  | -1.467841 | -0.862116 |
| C  | -10.049899 | -0.927868 | -1.813582 |
| H  | -10.171720 | 0.158021  | -1.685896 |
| H  | -9.713822  | -1.126360 | -2.842248 |
| H  | -11.010286 | -1.420231 | -1.647327 |
| C  | -3.741389  | 1.495929  | 0.399313  |
| C  | -3.121069  | 1.396232  | 1.649480  |
| C  | -4.335621  | 2.713857  | 0.065912  |
| C  | -3.057902  | 2.481726  | 2.512023  |
| H  | -2.695599  | 0.437442  | 1.946126  |
| C  | -4.279880  | 3.815494  | 0.914829  |
| H  | -4.862692  | 2.817708  | -0.883656 |
| C  | -3.627779  | 3.704375  | 2.146908  |
| H  | -2.575247  | 2.404211  | 3.484756  |
| H  | -4.749370  | 4.748381  | 0.612788  |
| O  | -3.507794  | 4.714218  | 3.052166  |
| C  | -4.085709  | 5.953869  | 2.710784  |
| H  | -5.173451  | 5.870147  | 2.571166  |
| H  | -3.880027  | 6.623242  | 3.548374  |
| H  | -3.641531  | 6.371095  | 1.795023  |
| O  | -0.254002  | -2.080840 | 0.625060  |
| Si | -0.443508  | -2.011881 | 2.463189  |
| H  | -0.224824  | -0.499549 | 2.113277  |
| O  | -0.812514  | -3.647889 | 2.550148  |
| C  | -2.117733  | -4.124964 | 2.777904  |
| H  | -2.107587  | -5.213000 | 2.637763  |
| H  | -2.460738  | -3.895259 | 3.794160  |
| H  | -2.844180  | -3.692857 | 2.069773  |
| O  | -1.534637  | -1.583091 | 3.663811  |
| C  | -1.625448  | -0.315616 | 4.258116  |

|    |           |           |           |
|----|-----------|-----------|-----------|
| H  | -1.191847 | -0.345621 | 5.266662  |
| H  | -1.094981 | 0.459618  | 3.679608  |
| H  | -2.681280 | -0.026367 | 4.338502  |
| C  | -0.237541 | -3.294023 | -0.159634 |
| H  | -0.176712 | -2.967353 | -1.208465 |
| H  | -1.196466 | -3.807468 | -0.018523 |
| Zn | 1.577530  | -0.775094 | 1.208506  |
| O  | 1.248107  | -2.056634 | 2.829325  |
| C  | 2.006040  | -3.180947 | 3.277523  |
| H  | 2.676882  | -3.519381 | 2.477851  |
| H  | 2.602806  | -2.872704 | 4.141451  |
| H  | 1.329572  | -3.994326 | 3.555431  |
| C  | 0.928919  | -4.183562 | 0.185097  |
| H  | 0.792328  | -4.645254 | 1.166049  |
| H  | 1.040532  | -4.974335 | -0.566180 |
| H  | 1.866744  | -3.611420 | 0.188265  |

### IM12

M06L SCF energy in Solvent: -6631.665200 a.u.

PBE0-D3BJ Free energy in Solvent: -6630.762267 a.u.

|   |           |          |           |
|---|-----------|----------|-----------|
| O | -0.544189 | 0.038054 | 0.390214  |
| C | -1.029486 | 1.113683 | 1.057407  |
| C | -2.422561 | 1.374527 | 1.101853  |
| C | -2.862479 | 2.412180 | 1.926703  |
| H | -3.933215 | 2.599251 | 1.996421  |
| C | -2.006259 | 3.229530 | 2.665620  |
| C | -0.642010 | 2.998506 | 2.538808  |
| H | 0.066864  | 3.640551 | 3.067236  |
| C | -0.139829 | 1.971311 | 1.741074  |
| C | -2.544317 | 4.326933 | 3.532837  |
| H | -3.085336 | 5.080709 | 2.945886  |
| H | -1.741877 | 4.844335 | 4.070949  |
| H | -3.252269 | 3.947507 | 4.281252  |
| C | -3.451664 | 0.539357 | 0.293756  |
| O | -3.018245 | 0.314262 | -1.040524 |
| C | -4.767855 | 1.340453 | 0.183310  |
| C | -4.826850 | 2.515194 | -0.637945 |
| C | -5.890899 | 0.973244 | 0.897671  |
| C | -3.705791 | 3.048792 | -1.328426 |
| C | -6.068279 | 3.229171 | -0.737024 |
| C | -7.105787 | 1.681810 | 0.802337  |
| H | -5.848107 | 0.105199 | 1.552436  |
| C | -3.810840 | 4.191927 | -2.085845 |
| H | -2.755411 | 2.530864 | -1.256347 |

|    |           |           |           |    |           |           |           |
|----|-----------|-----------|-----------|----|-----------|-----------|-----------|
| C  | -6.143937 | 4.392779  | -1.541213 | C  | 6.300478  | 0.493140  | 1.069353  |
| C  | -7.197838 | 2.780395  | -0.012119 | H  | 6.009636  | 1.216257  | 1.832695  |
| H  | -7.967263 | 1.344851  | 1.376577  | C  | 7.647170  | 0.142541  | 0.983435  |
| C  | -5.041311 | 4.868650  | -2.206480 | H  | 8.361050  | 0.594217  | 1.667273  |
| H  | -2.931056 | 4.577339  | -2.599350 | C  | 8.054780  | -0.785648 | 0.024249  |
| H  | -7.101352 | 4.910394  | -1.609748 | C  | 7.103278  | -1.352653 | -0.829528 |
| H  | -8.132451 | 3.334669  | -0.103070 | H  | 7.438210  | -2.077177 | -1.569090 |
| H  | -5.111677 | 5.767929  | -2.816546 | C  | 5.768757  | -0.994235 | -0.725811 |
| C  | -3.692596 | -0.825119 | 0.979018  | H  | 5.027814  | -1.441069 | -1.384544 |
| C  | -4.515082 | -1.821815 | 0.343749  | O  | 9.341364  | -1.201859 | -0.152550 |
| C  | -3.135752 | -1.118715 | 2.209146  | C  | 10.314510 | -0.640510 | 0.697052  |
| C  | -5.179661 | -1.613635 | -0.896645 | H  | 10.372907 | 0.452059  | 0.582643  |
| C  | -4.723121 | -3.078098 | 1.005177  | H  | 10.115186 | -0.874159 | 1.753608  |
| C  | -3.332911 | -2.360791 | 2.847372  | H  | 11.267176 | -1.085345 | 0.402527  |
| H  | -2.532295 | -0.364706 | 2.711345  | C  | 3.721048  | 1.669888  | -0.503467 |
| C  | -5.994810 | -2.580530 | -1.441024 | C  | 3.035594  | 1.696284  | -1.723643 |
| H  | -5.029088 | -0.675466 | -1.420017 | C  | 4.260900  | 2.871160  | -0.042009 |
| C  | -5.555399 | -4.056308 | 0.406527  | C  | 2.868438  | 2.874373  | -2.436137 |
| C  | -4.107266 | -3.325164 | 2.256311  | H  | 2.625348  | 0.764938  | -2.109476 |
| H  | -2.864789 | -2.544556 | 3.813979  | C  | 4.101116  | 4.065953  | -0.740073 |
| C  | -6.184824 | -3.816924 | -0.790931 | H  | 4.827724  | 2.893151  | 0.889284  |
| H  | -6.495080 | -2.386512 | -2.388489 | C  | 3.394439  | 4.072458  | -1.945453 |
| H  | -5.693577 | -5.004736 | 0.926718  | H  | 2.330487  | 2.891324  | -3.381790 |
| H  | -4.273550 | -4.287555 | 2.741261  | H  | 4.531357  | 4.980392  | -0.339672 |
| H  | -6.829074 | -4.574211 | -1.234810 | O  | 3.174137  | 5.180363  | -2.706440 |
| Zn | 1.296081  | -0.614396 | 0.249021  | C  | 3.700904  | 6.397840  | -2.230591 |
| O  | 3.093281  | -0.657514 | -0.314282 | H  | 4.796809  | 6.360604  | -2.144525 |
| N  | 1.942496  | 0.578621  | 1.908185  | H  | 3.422337  | 7.155449  | -2.965668 |
| C  | 1.345082  | 1.882768  | 1.547563  | H  | 3.277739  | 6.668739  | -1.252109 |
| H  | 1.593107  | 2.072632  | 0.494940  | O  | 0.793123  | -2.593847 | -0.124508 |
| H  | 1.845678  | 2.677685  | 2.130307  | Si | 0.120561  | -3.021808 | -1.655156 |
| C  | 1.660404  | 0.195767  | 3.298588  | H  | -0.061232 | -1.302857 | -1.808020 |
| H  | 1.900580  | 1.044472  | 3.966324  | O  | 0.124741  | -4.693796 | -1.538392 |
| H  | 0.591791  | -0.021972 | 3.418381  | C  | 1.268616  | -5.449144 | -1.862528 |
| C  | 2.584265  | -0.983623 | 3.540287  | H  | 1.103619  | -6.479008 | -1.522992 |
| H  | 2.083331  | -1.919605 | 3.258318  | H  | 1.451643  | -5.452209 | -2.944052 |
| H  | 2.854495  | -1.078918 | 4.596964  | H  | 2.178202  | -5.063219 | -1.373923 |
| C  | 3.792859  | -0.714047 | 2.628092  | O  | 1.141459  | -2.902405 | -2.955846 |
| H  | 3.999442  | -1.566199 | 1.968697  | C  | 1.812296  | -1.733661 | -3.375534 |
| H  | 4.710809  | -0.525806 | 3.194126  | H  | 2.371998  | -1.983430 | -4.282663 |
| C  | 3.423158  | 0.506976  | 1.770727  | H  | 1.109376  | -0.920959 | -3.611950 |
| H  | 3.845375  | 1.432793  | 2.202515  | H  | 2.513612  | -1.378619 | -2.605423 |
| C  | 3.860872  | 0.344298  | 0.271339  | C  | 1.012386  | -3.498814 | 0.971775  |
| C  | 5.339088  | -0.063103 | 0.225871  | H  | 2.012126  | -3.268125 | 1.369173  |

|    |           |           |           |
|----|-----------|-----------|-----------|
| H  | 1.022816  | -4.524689 | 0.591991  |
| Zn | -1.577373 | -0.839109 | -1.148022 |
| O  | -1.596074 | -2.888911 | -1.605196 |
| C  | -2.500970 | -3.991486 | -1.466482 |
| H  | -2.427272 | -4.426438 | -0.463172 |
| H  | -3.509331 | -3.603857 | -1.627321 |
| H  | -2.263241 | -4.757713 | -2.207102 |
| C  | -0.069407 | -3.305205 | 2.004039  |
| H  | -1.053053 | -3.562403 | 1.592168  |
| H  | 0.108448  | -3.930814 | 2.887286  |
| H  | -0.122742 | -2.256602 | 2.330834  |

**TS9**

M06L SCF energy in Solvent: -6631.664144 a.u.

PBE0-D3BJ Free energy in Solvent: -6630.760583 a.u.

|   |           |          |           |
|---|-----------|----------|-----------|
| O | -0.500797 | 0.016419 | 0.548783  |
| C | -1.003787 | 1.097624 | 1.188687  |
| C | -2.399943 | 1.342838 | 1.170795  |
| C | -2.888991 | 2.372764 | 1.977035  |
| H | -3.963642 | 2.546884 | 2.001742  |
| C | -2.073778 | 3.196810 | 2.754044  |
| C | -0.702134 | 2.988752 | 2.677264  |
| H | -0.025430 | 3.644140 | 3.231025  |
| C | -0.150690 | 1.972158 | 1.897683  |
| C | -2.661461 | 4.278519 | 3.608893  |
| H | -3.217599 | 5.012751 | 3.011441  |
| H | -1.885058 | 4.822680 | 4.158831  |
| H | -3.368375 | 3.878174 | 4.347575  |
| C | -3.374676 | 0.497341 | 0.305503  |
| O | -2.893339 | 0.305298 | -1.017161 |
| C | -4.702272 | 1.277061 | 0.163799  |
| C | -4.760514 | 2.459644 | -0.646351 |
| C | -5.836338 | 0.885731 | 0.846986  |
| C | -3.630639 | 3.023564 | -1.297774 |
| C | -6.011642 | 3.152660 | -0.771376 |
| C | -7.060886 | 1.573073 | 0.726190  |
| H | -5.794520 | 0.013165 | 1.495520  |
| C | -3.735988 | 4.173976 | -2.044040 |
| H | -2.672641 | 2.523571 | -1.202783 |
| C | -6.086955 | 4.323877 | -1.564566 |
| C | -7.152019 | 2.676575 | -0.081664 |
| H | -7.930675 | 1.215341 | 1.274973  |
| C | -4.975419 | 4.828461 | -2.192689 |
| H | -2.848936 | 4.583086 | -2.525841 |

|    |           |           |           |
|----|-----------|-----------|-----------|
| H  | -7.051838 | 4.824154  | -1.653980 |
| H  | -8.094141 | 3.214169  | -0.193395 |
| H  | -5.045791 | 5.733579  | -2.794156 |
| C  | -3.614764 | -0.882997 | 0.954937  |
| C  | -4.424782 | -1.868927 | 0.289184  |
| C  | -3.071223 | -1.200998 | 2.183924  |
| C  | -5.068357 | -1.641048 | -0.958341 |
| C  | -4.640064 | -3.137667 | 0.924341  |
| C  | -3.270780 | -2.456661 | 2.794188  |
| H  | -2.473574 | -0.457520 | 2.707838  |
| C  | -5.875603 | -2.597978 | -1.531625 |
| H  | -4.905130 | -0.696782 | -1.466629 |
| C  | -5.462963 | -4.105350 | 0.296378  |
| C  | -4.037507 | -3.410072 | 2.176524  |
| H  | -2.812023 | -2.658465 | 3.761873  |
| C  | -6.075849 | -3.845147 | -0.905107 |
| H  | -6.359101 | -2.388950 | -2.484651 |
| H  | -5.606441 | -5.063603 | 0.796899  |
| H  | -4.208328 | -4.382128 | 2.640141  |
| H  | -6.712883 | -4.594915 | -1.371770 |
| Zn | 1.327058  | -0.607400 | 0.357733  |
| O  | 3.146617  | -0.765803 | -0.113812 |
| N  | 1.992749  | 0.651538  | 2.001167  |
| C  | 1.341911  | 1.948413  | 1.731508  |
| H  | 1.595550  | 2.234726  | 0.704473  |
| H  | 1.795871  | 2.714730  | 2.387418  |
| C  | 1.747986  | 0.186379  | 3.374049  |
| H  | 1.951251  | 1.008383  | 4.086546  |
| H  | 0.693588  | -0.096607 | 3.490788  |
| C  | 2.738358  | -0.945842 | 3.535285  |
| H  | 2.332029  | -1.857746 | 3.075496  |
| H  | 2.944923  | -1.180080 | 4.584646  |
| C  | 3.970175  | -0.459960 | 2.763985  |
| H  | 4.441859  | -1.271358 | 2.199744  |
| H  | 4.732005  | -0.059177 | 3.442438  |
| C  | 3.472686  | 0.644678  | 1.810521  |
| H  | 3.857104  | 1.633525  | 2.118223  |
| C  | 3.845444  | 0.359718  | 0.309531  |
| C  | 5.348457  | 0.092897  | 0.193918  |
| C  | 6.303956  | 0.734517  | 0.980941  |
| H  | 5.996106  | 1.432120  | 1.761179  |
| C  | 7.669542  | 0.500152  | 0.817229  |
| H  | 8.380942  | 1.015507  | 1.457693  |
| C  | 8.100273  | -0.397701 | -0.159747 |

|    |           |           |           |
|----|-----------|-----------|-----------|
| C  | 7.154233  | -1.051504 | -0.956445 |
| H  | 7.507704  | -1.752478 | -1.709817 |
| C  | 5.803269  | -0.806197 | -0.777933 |
| H  | 5.065889  | -1.323259 | -1.388142 |
| O  | 9.405122  | -0.705873 | -0.407103 |
| C  | 10.373492 | -0.056841 | 0.383761  |
| H  | 10.338017 | 1.035224  | 0.255582  |
| H  | 10.249200 | -0.290790 | 1.451592  |
| H  | 11.341921 | -0.428858 | 0.043154  |
| C  | 3.506305  | 1.584620  | -0.563425 |
| C  | 2.591114  | 1.479675  | -1.617149 |
| C  | 4.055735  | 2.843349  | -0.313293 |
| C  | 2.204208  | 2.587623  | -2.358526 |
| H  | 2.171202  | 0.504803  | -1.861483 |
| C  | 3.682939  | 3.967813  | -1.044762 |
| H  | 4.796889  | 2.961106  | 0.478157  |
| C  | 2.740660  | 3.845251  | -2.070764 |
| H  | 1.486730  | 2.498285  | -3.171789 |
| H  | 4.130669  | 4.930306  | -0.810532 |
| O  | 2.298230  | 4.876707  | -2.840595 |
| C  | 2.818936  | 6.156443  | -2.559351 |
| H  | 3.908488  | 6.193423  | -2.704393 |
| H  | 2.338921  | 6.838938  | -3.263311 |
| H  | 2.586598  | 6.471871  | -1.531662 |
| O  | 0.875617  | -2.640310 | -0.067771 |
| Si | 0.200176  | -3.184415 | -1.533796 |
| H  | 0.083188  | -1.159305 | -1.774718 |
| O  | 0.181005  | -4.839692 | -1.377972 |
| C  | 1.308213  | -5.625542 | -1.699656 |
| H  | 1.080594  | -6.664792 | -1.438101 |
| H  | 1.543919  | -5.565988 | -2.768876 |
| H  | 2.204735  | -5.314866 | -1.139268 |
| O  | 1.174737  | -3.014067 | -2.841810 |
| C  | 1.989414  | -1.912976 | -3.191943 |
| H  | 2.656371  | -2.246919 | -3.993351 |
| H  | 1.385248  | -1.073097 | -3.561328 |
| H  | 2.591852  | -1.570625 | -2.337759 |
| C  | 1.111671  | -3.501332 | 1.065985  |
| H  | 2.129644  | -3.272082 | 1.412708  |
| H  | 1.087653  | -4.544507 | 0.736869  |
| Zn | -1.361188 | -0.706572 | -1.186496 |
| O  | -1.462888 | -2.914595 | -1.549369 |
| C  | -2.418740 | -3.984711 | -1.532368 |
| H  | -2.390796 | -4.511368 | -0.572132 |

|   |           |           |           |
|---|-----------|-----------|-----------|
| H | -3.401456 | -3.533357 | -1.680048 |
| H | -2.203519 | -4.695515 | -2.334738 |
| C | 0.067694  | -3.237363 | 2.120013  |
| H | -0.935724 | -3.468315 | 1.741458  |
| H | 0.251055  | -3.843424 | 3.015637  |
| H | 0.060248  | -2.179102 | 2.420227  |

### EtOSi(OMe)<sub>3</sub>

M06L SCF energy in Solvent: -789.061851 a.u.

PBE0-D3BJ Free energy in Solvent: -788.902548 a.u.

|    |           |           |           |
|----|-----------|-----------|-----------|
| Si | 0.361738  | 0.052601  | -0.003649 |
| O  | 0.765674  | -0.835113 | -1.323255 |
| O  | 0.652694  | 1.628071  | -0.362396 |
| O  | 1.248646  | -0.308833 | 1.329424  |
| C  | 2.046887  | -0.729370 | -1.911330 |
| H  | 2.119182  | -1.480948 | -2.703980 |
| H  | 2.203893  | 0.264871  | -2.350201 |
| H  | 2.845391  | -0.917602 | -1.178336 |
| C  | 0.449308  | 2.637548  | 0.606394  |
| H  | 1.105464  | 2.496181  | 1.475230  |
| H  | 0.678125  | 3.602770  | 0.143568  |
| H  | -0.593644 | 2.656519  | 0.955837  |
| C  | 1.173272  | -1.583882 | 1.934931  |
| H  | 1.911428  | -1.619876 | 2.742639  |
| H  | 0.176442  | -1.767269 | 2.357617  |
| H  | 1.401555  | -2.386374 | 1.217848  |
| O  | -1.208514 | -0.274216 | 0.341834  |
| C  | -2.227215 | -0.102018 | -0.640193 |
| H  | -1.992695 | -0.711983 | -1.525291 |
| H  | -2.249953 | 0.950126  | -0.967823 |
| C  | -3.552427 | -0.502710 | -0.044758 |
| H  | -4.359441 | -0.377892 | -0.775432 |
| H  | -3.532534 | -1.551295 | 0.270862  |
| H  | -3.784489 | 0.109677  | 0.833416  |

### 3a'

M06L SCF energy in Solvent: -690.884657 a.u.

PBE0-D3BJ Free energy in Solvent: -690.687611 a.u.

|   |           |           |           |
|---|-----------|-----------|-----------|
| C | -1.256454 | 0.604978  | -0.362688 |
| O | -1.505565 | 1.108772  | -1.439599 |
| O | -1.973382 | -0.381620 | 0.195077  |
| C | -3.079445 | -0.862258 | -0.601438 |
| H | -2.685857 | -1.201696 | -1.566780 |
| H | -3.753237 | -0.021190 | -0.802984 |

|   |           |           |           |
|---|-----------|-----------|-----------|
| C | -3.743081 | -1.966417 | 0.173430  |
| H | -3.042749 | -2.785259 | 0.367826  |
| H | -4.589205 | -2.367871 | -0.393891 |
| H | -4.119532 | -1.603241 | 1.135472  |
| C | -0.054291 | 0.996296  | 0.490485  |
| C | -0.442931 | 1.116715  | 1.966649  |
| H | -0.853250 | 0.174996  | 2.340870  |
| H | -1.209320 | 1.889121  | 2.103108  |
| H | 0.427359  | 1.390615  | 2.573328  |
| C | 1.048601  | -0.013082 | 0.218260  |
| C | 1.553675  | -0.855599 | 1.209326  |
| C | 1.561228  | -0.118722 | -1.080360 |
| C | 2.556917  | -1.776024 | 0.913933  |
| H | 1.169698  | -0.797564 | 2.225837  |
| C | 2.560211  | -1.037698 | -1.375328 |
| H | 1.172816  | 0.531734  | -1.862659 |
| C | 3.063558  | -1.870026 | -0.377704 |
| H | 2.941456  | -2.422773 | 1.700913  |
| H | 2.950611  | -1.101862 | -2.389513 |
| H | 3.848409  | -2.588647 | -0.607084 |
| C | 0.332405  | 2.410915  | 0.035593  |
| O | 1.437573  | 2.773578  | -0.275080 |
| H | -0.528565 | 3.123326  | 0.071427  |

**ent-3a'**

M06L SCF energy in Solvent: -690.884657 a.u.

PBE0-D3BJ Free energy in Solvent: -690.687611 a.u.

|   |           |           |           |
|---|-----------|-----------|-----------|
| C | 1.256454  | 0.604978  | -0.362688 |
| O | 1.505565  | 1.108772  | -1.439599 |
| O | 1.973382  | -0.381620 | 0.195077  |
| C | 3.079445  | -0.862258 | -0.601438 |
| H | 2.685857  | -1.201696 | -1.566780 |
| H | 3.753237  | -0.021190 | -0.802984 |
| C | 3.743081  | -1.966417 | 0.173430  |
| H | 3.042749  | -2.785259 | 0.367826  |
| H | 4.589205  | -2.367871 | -0.393891 |
| H | 4.119532  | -1.603241 | 1.135472  |
| C | 0.054291  | 0.996296  | 0.490485  |
| C | 0.442931  | 1.116715  | 1.966649  |
| H | 0.853250  | 0.174996  | 2.340870  |
| H | 1.209320  | 1.889121  | 2.103108  |
| H | -0.427359 | 1.390615  | 2.573328  |
| C | -1.048601 | -0.013082 | 0.218260  |
| C | -1.553675 | -0.855599 | 1.209326  |

|   |           |           |           |
|---|-----------|-----------|-----------|
| C | -1.561228 | -0.118722 | -1.080360 |
| C | -2.556917 | -1.776024 | 0.913933  |
| H | -1.169698 | -0.797564 | 2.225837  |
| C | -2.560211 | -1.037698 | -1.375328 |
| H | -1.172816 | 0.531734  | -1.862659 |
| C | -3.063558 | -1.870026 | -0.377704 |
| H | -2.941456 | -2.422773 | 1.700913  |
| H | -2.950611 | -1.101862 | -2.389513 |
| H | -3.848409 | -2.588647 | -0.607084 |
| C | -0.332405 | 2.410915  | 0.035593  |
| O | -1.437573 | 2.773578  | -0.275080 |
| H | 0.528565  | 3.123326  | 0.071427  |

**IM13a**

M06L SCF energy in Solvent: -6533.518194 a.u.

PBE0-D3BJ Free energy in Solvent: -6532.581813 a.u.

|   |          |           |           |
|---|----------|-----------|-----------|
| O | 0.961685 | -0.562148 | 0.070188  |
| C | 1.713964 | -1.204677 | 0.995994  |
| C | 3.100950 | -0.949580 | 1.092925  |
| C | 3.820220 | -1.591402 | 2.099061  |
| H | 4.884721 | -1.377438 | 2.195550  |
| C | 3.234784 | -2.487865 | 2.998938  |
| C | 1.871218 | -2.733527 | 2.868540  |
| H | 1.381889 | -3.435442 | 3.548664  |
| C | 1.104798 | -2.116693 | 1.878987  |
| C | 4.056878 | -3.163547 | 4.054777  |
| H | 4.633729 | -2.442773 | 4.648690  |
| H | 4.785116 | -3.860754 | 3.619123  |
| H | 3.430196 | -3.737002 | 4.747606  |
| C | 3.739693 | 0.069678  | 0.130241  |
| O | 3.449834 | -0.270177 | -1.202833 |
| C | 5.281525 | 0.057147  | 0.261064  |
| C | 6.036717 | -1.074278 | -0.202315 |
| C | 5.964061 | 1.115749  | 0.827455  |
| C | 5.443802 | -2.252085 | -0.731117 |
| C | 7.467563 | -1.047679 | -0.090504 |
| C | 7.370089 | 1.138428  | 0.930470  |
| H | 5.410506 | 1.970860  | 1.208426  |
| C | 6.210685 | -3.321236 | -1.133560 |
| H | 4.364738 | -2.292487 | -0.826774 |
| C | 8.226099 | -2.161244 | -0.527346 |
| C | 8.110226 | 0.081239  | 0.471614  |
| H | 7.858133 | 2.004267  | 1.375694  |
| C | 7.615883 | -3.279212 | -1.039852 |

|   |           |           |           |    |            |           |           |
|---|-----------|-----------|-----------|----|------------|-----------|-----------|
| H | 5.723408  | -4.209905 | -1.532659 | C  | -6.596872  | -0.440860 | -0.937698 |
| H | 9.311779  | -2.111607 | -0.437570 | H  | -7.062400  | 0.232854  | -1.654829 |
| H | 9.198415  | 0.083815  | 0.540925  | C  | -5.221338  | -0.471205 | -0.768383 |
| H | 8.211234  | -4.130650 | -1.366436 | H  | -4.587136  | 0.192366  | -1.352332 |
| C | 3.201709  | 1.482692  | 0.481068  | O  | -8.757447  | -1.181091 | -0.414083 |
| C | 3.328351  | 2.579039  | -0.439732 | C  | -9.600381  | -2.029944 | 0.330338  |
| C | 2.654668  | 1.733688  | 1.726735  | H  | -9.380618  | -3.090636 | 0.138807  |
| C | 3.977041  | 2.475023  | -1.702097 | H  | -9.517056  | -1.841181 | 1.411043  |
| C | 2.835563  | 3.872948  | -0.054560 | H  | -10.618484 | -1.807840 | 0.004159  |
| C | 2.187711  | 3.006801  | 2.106018  | C  | -2.530187  | -2.476134 | -0.601912 |
| H | 2.588183  | 0.922678  | 2.449842  | C  | -1.636489  | -2.197635 | -1.642258 |
| C | 4.086985  | 3.560747  | -2.541318 | C  | -2.852823  | -3.814462 | -0.371765 |
| H | 4.381758  | 1.512128  | -1.995864 | C  | -1.065317  | -3.210032 | -2.399501 |
| C | 2.963229  | 4.965881  | -0.947219 | H  | -1.366495  | -1.164056 | -1.853331 |
| C | 2.254260  | 4.055948  | 1.224919  | C  | -2.292744  | -4.846567 | -1.120197 |
| H | 1.764311  | 3.144061  | 3.101010  | H  | -3.559397  | -4.074553 | 0.417265  |
| C | 3.568198  | 4.817143  | -2.171971 | C  | -1.385951  | -4.545584 | -2.140889 |
| H | 4.590231  | 3.446022  | -3.499990 | H  | -0.361987  | -2.980808 | -3.197891 |
| H | 2.584632  | 5.938721  | -0.627971 | H  | -2.568540  | -5.874992 | -0.901364 |
| H | 1.907526  | 5.052797  | 1.505074  | O  | -0.775248  | -5.473184 | -2.929756 |
| H | 3.663226  | 5.667773  | -2.845245 | C  | -1.076202  | -6.826046 | -2.676806 |
| O | -2.585741 | -0.109558 | -0.127237 | H  | -2.145698  | -7.038947 | -2.822921 |
| N | -1.245643 | -1.305613 | 2.024388  | H  | -0.492107  | -7.405205 | -3.394862 |
| C | -0.347548 | -2.450474 | 1.722997  | H  | -0.792668  | -7.121882 | -1.655867 |
| H | -0.548897 | -2.763018 | 0.693722  | Zn | -0.796692  | 0.144883  | 0.504248  |
| H | -0.621652 | -3.292925 | 2.384076  | Zn | 1.707551   | -0.292440 | -1.846940 |
| C | -1.138100 | -0.899692 | 3.438379  | C  | -1.136147  | 2.666563  | -1.181972 |
| H | -1.162469 | -1.804927 | 4.074520  | O  | -0.435258  | 1.668495  | -1.060651 |
| H | -0.176024 | -0.402454 | 3.612742  | O  | -1.687182  | 3.048117  | -2.318790 |
| C | -2.353393 | -0.024352 | 3.672788  | C  | -1.549945  | 2.118115  | -3.441872 |
| H | -2.123080 | 1.014889  | 3.414892  | H  | -0.555845  | 1.661931  | -3.393715 |
| H | -2.662153 | -0.035671 | 4.723286  | H  | -1.618102  | 2.766456  | -4.318795 |
| C | -3.419626 | -0.593820 | 2.727285  | C  | -2.648830  | 1.091957  | -3.374250 |
| H | -3.897857 | 0.199510  | 2.139975  | H  | -2.616503  | 0.554654  | -2.417127 |
| H | -4.220179 | -1.108052 | 3.270222  | H  | -2.525716  | 0.358470  | -4.178951 |
| C | -2.696997 | -1.572671 | 1.785185  | H  | -3.634757  | 1.559727  | -3.478287 |
| H | -2.896407 | -2.619726 | 2.076513  | C  | -1.399324  | 3.666613  | -0.065203 |
| C | -3.085778 | -1.341222 | 0.279382  | C  | -0.936427  | 3.154776  | 1.283520  |
| C | -4.615466 | -1.333561 | 0.152907  | O  | -0.801909  | 1.995229  | 1.643994  |
| C | -5.450922 | -2.169248 | 0.895316  | C  | -0.650908  | 4.956765  | -0.415070 |
| H | -5.028921 | -2.850720 | 1.634445  | H  | -1.156216  | 5.471383  | -1.237410 |
| C | -6.837000 | -2.154677 | 0.741158  | H  | 0.378392   | 4.739594  | -0.716532 |
| H | -7.448999 | -2.816556 | 1.348311  | H  | -0.611426  | 5.631217  | 0.449055  |
| C | -7.417770 | -1.284518 | -0.182370 | C  | -2.900993  | 3.893779  | 0.165884  |

|   |           |           |           |
|---|-----------|-----------|-----------|
| C | -3.424316 | 5.171797  | 0.381869  |
| C | -3.755702 | 2.784227  | 0.212475  |
| C | -4.787408 | 5.340655  | 0.612234  |
| H | -2.778896 | 6.047019  | 0.356946  |
| C | -5.116158 | 2.961225  | 0.439729  |
| H | -3.369550 | 1.768475  | 0.066788  |
| C | -5.636241 | 4.238298  | 0.639718  |
| H | -5.184784 | 6.341937  | 0.768233  |
| H | -5.767459 | 2.087767  | 0.458410  |
| H | -6.701383 | 4.374647  | 0.818545  |
| H | 0.777851  | -0.325100 | -3.076050 |
| H | -0.807719 | 3.964673  | 2.034197  |

**TS10a**

M06L SCF energy in Solvent: -6533.505947 a.u.

PBE0-D3BJ Free energy in Solvent: -6532.56688 a.u.

|   |          |           |           |
|---|----------|-----------|-----------|
| O | 1.046067 | 0.413425  | 0.051070  |
| C | 1.701783 | 1.408993  | -0.593877 |
| C | 3.115579 | 1.404458  | -0.752079 |
| C | 3.711033 | 2.460229  | -1.442232 |
| H | 4.791682 | 2.444106  | -1.578832 |
| C | 2.993341 | 3.525258  | -1.988243 |
| C | 1.610264 | 3.485915  | -1.859196 |
| H | 1.003532 | 4.277485  | -2.305532 |
| C | 0.958180 | 2.457675  | -1.179078 |
| C | 3.689062 | 4.654977  | -2.684481 |
| H | 4.536724 | 4.304052  | -3.285580 |
| H | 4.093363 | 5.385076  | -1.969579 |
| H | 3.009618 | 5.200566  | -3.349964 |
| C | 3.963545 | 0.204825  | -0.282699 |
| O | 3.673766 | -0.093660 | 1.077047  |
| C | 5.470898 | 0.502982  | -0.364507 |
| C | 6.078610 | 1.429236  | 0.547268  |
| C | 6.262885 | -0.108300 | -1.315765 |
| C | 5.348171 | 2.175394  | 1.510233  |
| C | 7.493749 | 1.655269  | 0.462713  |
| C | 7.652029 | 0.116764  | -1.394438 |
| H | 5.808864 | -0.794489 | -2.027720 |
| C | 5.977154 | 3.071091  | 2.343625  |
| H | 4.277417 | 2.018683  | 1.586381  |
| C | 8.108921 | 2.573560  | 1.347931  |
| C | 8.258830 | 0.973934  | -0.514303 |
| H | 8.234274 | -0.398367 | -2.156805 |
| C | 7.370473 | 3.270416  | 2.272311  |

|   |           |           |           |
|---|-----------|-----------|-----------|
| H | 5.389498  | 3.631684  | 3.069267  |
| H | 9.186479  | 2.721799  | 1.270249  |
| H | 9.333022  | 1.156132  | -0.558131 |
| H | 7.855068  | 3.978155  | 2.943312  |
| C | 3.598748  | -1.026803 | -1.167536 |
| C | 3.939160  | -2.360597 | -0.744025 |
| C | 2.884855  | -0.878445 | -2.343540 |
| C | 4.765414  | -2.638528 | 0.381058  |
| C | 3.424251  | -3.479032 | -1.484185 |
| C | 2.419304  | -1.978819 | -3.089583 |
| H | 2.658557  | 0.125501  | -2.698349 |
| C | 5.016030  | -3.931909 | 0.777470  |
| H | 5.186899  | -1.807833 | 0.936863  |
| C | 3.693150  | -4.796474 | -1.036129 |
| C | 2.659312  | -3.256430 | -2.653530 |
| H | 1.845744  | -1.802937 | -3.999033 |
| C | 4.462199  | -5.024079 | 0.078467  |
| H | 5.653826  | -4.112476 | 1.641224  |
| H | 3.282215  | -5.629264 | -1.607952 |
| H | 2.276534  | -4.117888 | -3.201373 |
| H | 4.662765  | -6.041871 | 0.409592  |
| O | -2.748799 | 0.045705  | 0.238909  |
| N | -1.167408 | 1.274768  | -1.682125 |
| C | -0.539094 | 2.488161  | -1.111250 |
| H | -0.884706 | 2.578132  | -0.073577 |
| H | -0.921001 | 3.377428  | -1.644711 |
| C | -0.674868 | 0.929758  | -3.026019 |
| H | -0.753950 | 1.812052  | -3.688587 |
| H | 0.381741  | 0.643959  | -2.973981 |
| C | -1.605555 | -0.188557 | -3.452114 |
| H | -1.231550 | -1.145560 | -3.065447 |
| H | -1.669286 | -0.280756 | -4.541263 |
| C | -2.945950 | 0.172014  | -2.793697 |
| H | -3.367858 | -0.684672 | -2.253319 |
| H | -3.700579 | 0.485143  | -3.522958 |
| C | -2.647009 | 1.314328  | -1.805101 |
| H | -2.928463 | 2.293141  | -2.236553 |
| C | -3.350399 | 1.107566  | -0.417431 |
| C | -4.830981 | 0.785408  | -0.682041 |
| C | -5.590969 | 1.467766  | -1.633596 |
| H | -5.133237 | 2.246394  | -2.244262 |
| C | -6.932767 | 1.168968  | -1.863719 |
| H | -7.479552 | 1.721680  | -2.623368 |
| C | -7.549391 | 0.158957  | -1.124320 |



|    |            |           |           |
|----|------------|-----------|-----------|
| C  | -6.803490  | -0.541695 | -0.171800 |
| H  | -7.292745  | -1.334308 | 0.391760  |
| C  | -5.468192  | -0.230150 | 0.038267  |
| H  | -4.890331  | -0.793625 | 0.767074  |
| O  | -8.852248  | -0.218936 | -1.262922 |
| C  | -9.617216  | 0.469278  | -2.225312 |
| H  | -9.683282  | 1.543985  | -2.000045 |
| H  | -9.204437  | 0.345349  | -3.237638 |
| H  | -10.616688 | 0.031087  | -2.187241 |
| C  | -3.271889  | 2.389055  | 0.439218  |
| C  | -2.690991  | 2.347039  | 1.712940  |
| C  | -3.738735  | 3.624459  | -0.010565 |
| C  | -2.579050  | 3.484828  | 2.497907  |
| H  | -2.297073  | 1.399043  | 2.073832  |
| C  | -3.632600  | 4.780709  | 0.760301  |
| H  | -4.203520  | 3.708817  | -0.992510 |
| C  | -3.049774  | 4.713642  | 2.027559  |
| H  | -2.120043  | 3.447260  | 3.484044  |
| H  | -4.008425  | 5.721357  | 0.365948  |
| O  | -2.896511  | 5.776502  | 2.866927  |
| C  | -3.349374  | 7.027072  | 2.402198  |
| H  | -4.431189  | 7.020389  | 2.202781  |
| H  | -3.134758  | 7.742048  | 3.199093  |
| H  | -2.822960  | 7.335012  | 1.486686  |
| Zn | -0.877620  | -0.165193 | -0.142910 |
| Zn | 2.069982   | -1.039297 | 1.020595  |
| C  | -1.177219  | -2.037614 | 2.280719  |
| O  | -0.750176  | -0.913873 | 2.029783  |
| O  | -1.960482  | -2.312688 | 3.312662  |
| C  | -2.483435  | -1.183525 | 4.069892  |
| H  | -1.714072  | -0.405970 | 4.109871  |
| H  | -2.637842  | -1.593416 | 5.071486  |
| C  | -3.755734  | -0.700588 | 3.426466  |
| H  | -3.558195  | -0.350562 | 2.405018  |
| H  | -4.176759  | 0.134422  | 3.997844  |
| H  | -4.500776  | -1.503551 | 3.385128  |
| C  | -0.830089  | -3.297975 | 1.499532  |
| C  | -0.014905  | -2.955449 | 0.243286  |
| O  | -0.366918  | -2.095569 | -0.599965 |
| C  | -0.015654  | -4.210777 | 2.420338  |
| H  | -0.651696  | -4.651434 | 3.192790  |
| H  | 0.792701   | -3.656370 | 2.907252  |
| H  | 0.449263   | -5.019187 | 1.843175  |
| C  | -2.107257  | -3.966877 | 0.979670  |

|   |           |           |           |
|---|-----------|-----------|-----------|
| C | -2.274115 | -5.352758 | 1.014881  |
| C | -3.113996 | -3.176531 | 0.409629  |
| C | -3.432158 | -5.937804 | 0.506259  |
| H | -1.506195 | -5.991239 | 1.446840  |
| C | -4.269636 | -3.763599 | -0.092363 |
| H | -3.006160 | -2.089727 | 0.352174  |
| C | -4.433712 | -5.146885 | -0.046188 |
| H | -3.547431 | -7.019636 | 0.546363  |
| H | -5.043142 | -3.128493 | -0.524130 |
| H | -5.339022 | -5.605473 | -0.440443 |
| H | 1.304034  | -2.431000 | 1.127561  |
| H | 0.582100  | -3.814455 | -0.119643 |

#### IM14a

M06L SCF energy in Solvent: -6533.560070 a.u.

PBE0-D3BJ Free energy in Solvent: -6532.618286 a.u.

|   |           |           |           |
|---|-----------|-----------|-----------|
| O | -0.326663 | -1.094566 | 0.240278  |
| C | -0.924307 | -2.262596 | -0.061930 |
| C | -2.324063 | -2.367456 | -0.265746 |
| C | -2.843398 | -3.629422 | -0.558755 |
| H | -3.915812 | -3.725515 | -0.727089 |
| C | -2.054333 | -4.777225 | -0.679085 |
| C | -0.675320 | -4.626044 | -0.554583 |
| H | -0.019873 | -5.488213 | -0.702033 |
| C | -0.103655 | -3.392205 | -0.254194 |
| C | -2.676218 | -6.114165 | -0.947712 |
| H | -3.527022 | -6.037286 | -1.635691 |
| H | -3.058842 | -6.576994 | -0.027216 |
| H | -1.955771 | -6.816741 | -1.383150 |
| C | -3.209387 | -1.101146 | -0.337704 |
| O | -2.990104 | -0.242082 | 0.769365  |
| C | -4.700836 | -1.483922 | -0.336264 |
| C | -5.311968 | -1.994358 | 0.856790  |
| C | -5.467827 | -1.373020 | -1.478716 |
| C | -4.598007 | -2.224980 | 2.062364  |
| C | -6.706410 | -2.333203 | 0.830825  |
| C | -6.837654 | -1.705210 | -1.499022 |
| H | -5.009414 | -1.014530 | -2.398356 |
| C | -5.224643 | -2.740964 | 3.173074  |
| H | -3.543695 | -1.971933 | 2.097316  |
| C | -7.320695 | -2.849631 | 1.998010  |
| C | -7.448930 | -2.167602 | -0.362723 |
| H | -7.401729 | -1.589922 | -2.423365 |
| C | -6.599356 | -3.051179 | 3.148828  |

|   |           |           |           |    |           |           |           |
|---|-----------|-----------|-----------|----|-----------|-----------|-----------|
| H | -4.650074 | -2.911256 | 4.082487  | C  | 7.093326  | 0.986812  | -0.678243 |
| H | -8.382682 | -3.094019 | 1.957462  | H  | 7.438872  | 2.015589  | -0.598735 |
| H | -8.507771 | -2.427349 | -0.360647 | C  | 5.755881  | 0.662218  | -0.526713 |
| H | -7.082934 | -3.454811 | 4.037447  | H  | 5.018015  | 1.436888  | -0.332819 |
| C | -2.845387 | -0.310066 | -1.629234 | O  | 9.326648  | 0.402767  | -1.083195 |
| C | -3.337774 | 1.032497  | -1.814209 | C  | 10.288749 | -0.588340 | -1.356084 |
| C | -2.008890 | -0.835446 | -2.597908 | H  | 10.340061 | -1.338883 | -0.553194 |
| C | -4.253445 | 1.660776  | -0.922333 | H  | 10.085264 | -1.103457 | -2.306984 |
| C | -2.930363 | 1.773818  | -2.974425 | H  | 11.247329 | -0.069859 | -1.426149 |
| C | -1.581191 | -0.088314 | -3.714626 | C  | 3.641679  | -1.318400 | 1.083562  |
| H | -1.668365 | -1.864401 | -2.497209 | C  | 2.882827  | -0.500185 | 1.927218  |
| C | -4.724309 | 2.931981  | -1.162781 | C  | 4.199473  | -2.471826 | 1.639340  |
| H | -4.573501 | 1.117044  | -0.039237 | C  | 2.648072  | -0.839947 | 3.252443  |
| C | -3.435982 | 3.081438  | -3.185945 | H  | 2.485636  | 0.434956  | 1.531748  |
| C | -2.026595 | 1.195479  | -3.897394 | C  | 3.975204  | -2.833650 | 2.964497  |
| H | -0.902633 | -0.545682 | -4.434436 | H  | 4.824426  | -3.120290 | 1.023863  |
| C | -4.312331 | 3.657266  | -2.299241 | C  | 3.183509  | -2.017514 | 3.778863  |
| H | -5.439922 | 3.375391  | -0.470331 | H  | 2.052017  | -0.203071 | 3.902629  |
| H | -3.106531 | 3.623662  | -4.072827 | H  | 4.418591  | -3.747346 | 3.352490  |
| H | -1.709840 | 1.783021  | -4.759177 | O  | 2.893433  | -2.276518 | 5.084414  |
| H | -4.694573 | 4.661865  | -2.475780 | C  | 3.421843  | -3.461848 | 5.633824  |
| O | 3.079507  | 0.169067  | -0.739490 | H  | 4.521637  | -3.464469 | 5.613650  |
| N | 1.881792  | -2.315644 | -1.266299 | H  | 3.080556  | -3.492884 | 6.670408  |
| C | 1.384676  | -3.223398 | -0.199197 | H  | 3.055878  | -4.353623 | 5.104191  |
| H | 1.692328  | -2.799319 | 0.762929  | Zn | 1.244290  | -0.290126 | -0.683136 |
| H | 1.886540  | -4.202639 | -0.306414 | Zn | -1.373468 | 0.646086  | 0.482876  |
| C | 1.479943  | -2.759112 | -2.612613 | C  | 0.807498  | 2.516865  | 0.044271  |
| H | 1.712588  | -3.834062 | -2.738753 | O  | 0.142707  | 1.409408  | -0.510348 |
| H | 0.397777  | -2.640544 | -2.742446 | C  | -0.071644 | 3.783355  | 0.067655  |
| C | 2.331604  | -1.900540 | -3.518190 | C  | -0.553340 | 4.093377  | -1.348680 |
| H | 1.911184  | -0.885303 | -3.567795 | H  | 0.307570  | 4.238722  | -2.011451 |
| H | 2.385523  | -2.284927 | -4.542265 | H  | -1.125292 | 3.246811  | -1.739017 |
| C | 3.681346  | -1.881919 | -2.800006 | H  | -1.184592 | 4.987128  | -1.380152 |
| H | 4.198652  | -0.925855 | -2.923554 | C  | 0.738072  | 4.909925  | 0.702086  |
| H | 4.343623  | -2.663758 | -3.191432 | C  | 1.099572  | 4.812201  | 2.052094  |
| C | 3.367742  | -2.145369 | -1.313444 | C  | 1.171311  | 6.020280  | -0.023907 |
| H | 3.824312  | -3.090704 | -0.973198 | C  | 1.876447  | 5.793234  | 2.657492  |
| C | 3.825236  | -0.953302 | -0.403360 | H  | 0.766445  | 3.953889  | 2.638413  |
| C | 5.311117  | -0.660324 | -0.633227 | C  | 1.952495  | 7.002797  | 0.580159  |
| C | 6.260944  | -1.645852 | -0.898186 | H  | 0.899659  | 6.125855  | -1.071878 |
| H | 5.957355  | -2.688706 | -1.002681 | C  | 2.308290  | 6.893359  | 1.920472  |
| C | 7.613069  | -1.338242 | -1.057296 | H  | 2.146190  | 5.697192  | 3.707766  |
| H | 8.319789  | -2.135600 | -1.272543 | H  | 2.281897  | 7.860286  | -0.004116 |
| C | 8.034261  | -0.013341 | -0.944595 | H  | 2.918089  | 7.662627  | 2.390686  |

|   |           |          |           |
|---|-----------|----------|-----------|
| C | -1.287860 | 3.528812 | 0.945763  |
| O | -1.508870 | 2.484331 | 1.569321  |
| O | -2.112589 | 4.559231 | 0.998967  |
| C | -3.308524 | 4.392874 | 1.808227  |
| H | -3.788466 | 3.451766 | 1.517818  |
| H | -2.993136 | 4.299419 | 2.853813  |
| C | -4.173461 | 5.595905 | 1.563104  |
| H | -4.438817 | 5.673502 | 0.503164  |
| H | -5.098660 | 5.515252 | 2.143085  |
| H | -3.663725 | 6.519351 | 1.856411  |
| H | 1.706640  | 2.746241 | -0.548510 |
| H | 1.152988  | 2.311050 | 1.074118  |

### IM13c

M06L SCF energy in Solvent: -6533.512659 a.u.

PBE0-D3BJ Free energy in Solvent: -6532.574476 a.u.

|   |          |           |           |
|---|----------|-----------|-----------|
| O | 0.791706 | -0.764953 | 0.058177  |
| C | 1.520663 | -1.581758 | 0.860725  |
| C | 2.918890 | -1.406462 | 0.973005  |
| C | 3.615106 | -2.234148 | 1.852338  |
| H | 4.688995 | -2.089557 | 1.967781  |
| C | 2.996074 | -3.237289 | 2.605201  |
| C | 1.620779 | -3.394427 | 2.464263  |
| H | 1.103257 | -4.167434 | 3.038116  |
| C | 0.875172 | -2.590743 | 1.600804  |
| C | 3.796596 | -4.112248 | 3.522215  |
| H | 4.445429 | -3.524775 | 4.184350  |
| H | 4.455286 | -4.791000 | 2.963788  |
| H | 3.150661 | -4.732366 | 4.154497  |
| C | 3.601692 | -0.289231 | 0.160075  |
| O | 3.287637 | -0.425137 | -1.204878 |
| C | 5.141766 | -0.399991 | 0.278633  |
| C | 5.845269 | -1.472960 | -0.367226 |
| C | 5.868896 | 0.512555  | 1.017864  |
| C | 5.201750 | -2.525243 | -1.072052 |
| C | 7.276454 | -1.526722 | -0.263161 |
| C | 7.273811 | 0.454693  | 1.117203  |
| H | 5.351215 | 1.314040  | 1.539805  |
| C | 5.921081 | -3.545560 | -1.650107 |
| H | 4.121466 | -2.507113 | -1.156885 |
| C | 7.985892 | -2.582641 | -0.886213 |
| C | 7.967663 | -0.538300 | 0.477152  |
| H | 7.798941 | 1.209586  | 1.700584  |
| C | 7.327325 | -3.575679 | -1.568500 |

|   |           |           |           |
|---|-----------|-----------|-----------|
| H | 5.394755  | -4.338462 | -2.179553 |
| H | 9.073015  | -2.593490 | -0.800340 |
| H | 9.054896  | -0.594285 | 0.537595  |
| H | 7.884812  | -4.384441 | -2.038750 |
| C | 3.143468  | 1.090980  | 0.696477  |
| C | 3.410596  | 2.293598  | -0.043949 |
| C | 2.542622  | 1.206340  | 1.936471  |
| C | 4.089524  | 2.312111  | -1.294326 |
| C | 3.036694  | 3.558676  | 0.523531  |
| C | 2.170111  | 2.450340  | 2.484940  |
| H | 2.358710  | 0.306595  | 2.522211  |
| C | 4.346961  | 3.493778  | -1.951492 |
| H | 4.397535  | 1.367120  | -1.729309 |
| C | 3.325171  | 4.754624  | -0.178751 |
| C | 2.404160  | 3.607898  | 1.789871  |
| H | 1.689987  | 2.478310  | 3.462699  |
| C | 3.958390  | 4.729794  | -1.397568 |
| H | 4.868543  | 3.471283  | -2.907068 |
| H | 3.043616  | 5.701511  | 0.285065  |
| H | 2.127273  | 4.580914  | 2.200016  |
| H | 4.176806  | 5.658186  | -1.924299 |
| O | -2.748937 | 0.089822  | 0.275153  |
| N | -1.381289 | -1.644342 | 1.990049  |
| C | -0.603638 | -2.795827 | 1.464994  |
| H | -0.878225 | -2.926407 | 0.412641  |
| H | -0.915306 | -3.707811 | 2.006028  |
| C | -1.141576 | -1.437401 | 3.430865  |
| H | -1.216237 | -2.407922 | 3.957102  |
| H | -0.127398 | -1.051618 | 3.591317  |
| C | -2.250345 | -0.496032 | 3.844874  |
| H | -1.975332 | 0.534055  | 3.587254  |
| H | -2.438469 | -0.524409 | 4.923288  |
| C | -3.446406 | -0.958799 | 3.009277  |
| H | -4.043741 | -0.112988 | 2.652245  |
| H | -4.119140 | -1.596769 | 3.594418  |
| C | -2.865660 | -1.750949 | 1.821718  |
| H | -3.136049 | -2.819274 | 1.890892  |
| C | -3.319282 | -1.165948 | 0.431449  |
| C | -4.846690 | -1.039293 | 0.406451  |
| C | -5.706946 | -1.959524 | 1.005659  |
| H | -5.304334 | -2.805271 | 1.564503  |
| C | -7.093869 | -1.827339 | 0.935866  |
| H | -7.724731 | -2.565094 | 1.425273  |
| C | -7.649688 | -0.748105 | 0.247510  |

|    |            |           |           |
|----|------------|-----------|-----------|
| C  | -6.802929  | 0.189096  | -0.352801 |
| H  | -7.250814  | 1.030250  | -0.878548 |
| C  | -5.428031  | 0.041966  | -0.267804 |
| H  | -4.770930  | 0.781884  | -0.719427 |
| O  | -8.987020  | -0.517946 | 0.115329  |
| C  | -9.855975  | -1.453366 | 0.711231  |
| H  | -9.722060  | -2.459436 | 0.286953  |
| H  | -9.710743  | -1.506877 | 1.800427  |
| H  | -10.868640 | -1.104288 | 0.499464  |
| C  | -2.880553  | -2.119719 | -0.699629 |
| C  | -1.963040  | -1.706292 | -1.672452 |
| C  | -3.329044  | -3.440543 | -0.766283 |
| C  | -1.495945  | -2.570873 | -2.652386 |
| H  | -1.592291  | -0.681204 | -1.665873 |
| C  | -2.873804  | -4.326987 | -1.738993 |
| H  | -4.056834  | -3.802640 | -0.039706 |
| C  | -1.945122  | -3.893063 | -2.690038 |
| H  | -0.773871  | -2.231549 | -3.392740 |
| H  | -3.248640  | -5.347348 | -1.748665 |
| O  | -1.432933  | -4.675128 | -3.679735 |
| C  | -1.865242  | -6.015852 | -3.723721 |
| H  | -2.950315  | -6.087674 | -3.889745 |
| H  | -1.340680  | -6.475418 | -4.563620 |
| H  | -1.612019  | -6.554788 | -2.798789 |
| Zn | -0.873900  | -0.014271 | 0.683911  |
| Zn | 1.541706   | -0.272867 | -1.820464 |
| C  | -1.621737  | 2.334516  | -0.850368 |
| O  | -0.608001  | 1.644707  | -0.883236 |
| O  | -2.484486  | 2.472041  | -1.839285 |
| C  | -2.251458  | 1.717124  | -3.067892 |
| H  | -1.353853  | 1.102042  | -2.940618 |
| H  | -2.050032  | 2.477693  | -3.829819 |
| C  | -3.479101  | 0.906395  | -3.376245 |
| H  | -3.656294  | 0.156276  | -2.598322 |
| H  | -3.338287  | 0.378562  | -4.326068 |
| H  | -4.369082  | 1.540002  | -3.462941 |
| C  | -1.964704  | 3.246496  | 0.325437  |
| C  | -1.185743  | 2.874607  | 1.569717  |
| O  | -0.758424  | 1.774932  | 1.882552  |
| C  | -3.439984  | 3.113236  | 0.739029  |
| H  | -3.668393  | 3.771598  | 1.585852  |
| H  | -3.651511  | 2.071330  | 1.001381  |
| H  | -4.081808  | 3.393636  | -0.101539 |
| C  | -1.568343  | 4.663706  | -0.089277 |

|   |           |           |           |
|---|-----------|-----------|-----------|
| C | -2.495055 | 5.703633  | -0.182316 |
| C | -0.227492 | 4.915768  | -0.405782 |
| C | -2.089648 | 6.972685  | -0.586521 |
| H | -3.542093 | 5.529398  | 0.054975  |
| C | 0.173058  | 6.183231  | -0.815354 |
| H | 0.509318  | 4.112129  | -0.345657 |
| C | -0.756921 | 7.215403  | -0.906459 |
| H | -2.823783 | 7.773248  | -0.657507 |
| H | 1.216560  | 6.353342  | -1.074133 |
| H | -0.444330 | 8.206365  | -1.230482 |
| H | 0.599323  | -0.124971 | -3.030407 |
| H | -1.065601 | 3.711522  | 2.290853  |

### 3a

M06L SCF energy in Solvent: -692.101253 a.u.

PBE0-D3BJ Free energy in Solvent: -691.880882 a.u.

|   |           |           |           |
|---|-----------|-----------|-----------|
| C | -1.314412 | 0.560980  | -0.150945 |
| O | -1.820415 | 1.209359  | -1.052154 |
| O | -1.800758 | -0.617359 | 0.260846  |
| C | -2.951185 | -1.100547 | -0.466938 |
| H | -2.686604 | -1.157815 | -1.529544 |
| H | -3.756762 | -0.362511 | -0.372818 |
| C | -3.320621 | -2.438382 | 0.110509  |
| H | -2.495282 | -3.150939 | 0.012108  |
| H | -4.189898 | -2.847251 | -0.415306 |
| H | -3.573372 | -2.354260 | 1.172643  |
| C | -0.069035 | 0.964644  | 0.630087  |
| C | 0.290645  | 2.424088  | 0.256290  |
| O | 0.517758  | 2.654280  | -1.105107 |
| C | -0.396681 | 0.940274  | 2.124117  |
| H | -0.593658 | -0.074621 | 2.481409  |
| H | -1.281655 | 1.552616  | 2.333987  |
| H | 0.433204  | 1.358615  | 2.706186  |
| C | 1.064130  | 0.018659  | 0.251077  |
| C | 1.906005  | -0.552693 | 1.208621  |
| C | 1.303538  | -0.269307 | -1.098684 |
| C | 2.958704  | -1.382844 | 0.830472  |
| H | 1.744673  | -0.355220 | 2.266583  |
| C | 2.352332  | -1.099003 | -1.477261 |
| H | 0.665922  | 0.174922  | -1.860735 |
| C | 3.186465  | -1.659933 | -0.513252 |
| H | 3.601849  | -1.816173 | 1.594980  |
| H | 2.519896  | -1.306782 | -2.532891 |
| H | 4.008492  | -2.309848 | -0.808268 |

|   |           |          |           |
|---|-----------|----------|-----------|
| H | -0.508495 | 3.079083 | 0.651084  |
| H | -0.338191 | 2.476826 | -1.533434 |
| H | 1.217895  | 2.687488 | 0.780789  |

**ent-3a**

M06L SCF energy in Solvent: -692.101249 a.u.

PBE0-D3BJ Free energy in Solvent: -691.880878 a.u.

|   |           |           |           |
|---|-----------|-----------|-----------|
| C | 1.314283  | 0.560955  | -0.151185 |
| O | 1.819738  | 1.209447  | -1.052617 |
| O | 1.801082  | -0.617264 | 0.260438  |
| C | 2.951334  | -1.100214 | -0.467786 |
| H | 2.686273  | -1.157777 | -1.530265 |
| H | 3.756701  | -0.361873 | -0.374249 |
| C | 3.321501  | -2.437782 | 0.109766  |
| H | 2.496371  | -3.150663 | 0.011919  |
| H | 4.190679  | -2.846494 | -0.416338 |
| H | 3.574711  | -2.353360 | 1.171770  |
| C | 0.069055  | 0.964251  | 0.630325  |
| C | -0.290786 | 2.423916  | 0.257589  |
| O | -0.518040 | 2.655151  | -1.103613 |
| C | 0.397160  | 0.938926  | 2.124241  |
| H | 0.594122  | -0.076226 | 2.480825  |
| H | 1.282275  | 1.551036  | 2.334209  |
| H | -0.432491 | 1.357008  | 2.706816  |
| C | -1.064179 | 0.018429  | 0.251149  |
| C | -1.905382 | -0.553986 | 1.208637  |
| C | -1.304381 | -0.268267 | -1.098752 |
| C | -2.958165 | -1.383962 | 0.830328  |
| H | -1.743449 | -0.357489 | 2.266691  |
| C | -2.353270 | -1.097757 | -1.477502 |
| H | -0.667333 | 0.176856  | -1.860763 |
| C | -3.186712 | -1.659775 | -0.513522 |
| H | -3.600757 | -1.818142 | 1.594815  |
| H | -2.521475 | -1.304492 | -2.533233 |
| H | -4.008807 | -2.309547 | -0.808663 |
| H | 0.508244  | 3.078768  | 0.652848  |
| H | 0.338000  | 2.478500  | -1.532077 |
| H | -1.218050 | 2.686815  | 0.782317  |

**IM15**

M06L SCF energy in Solvent: -6577.137479 a.u.

PBE0-D3BJ Free energy in Solvent: -6576.301821 a.u.

|   |           |           |          |
|---|-----------|-----------|----------|
| O | -0.401352 | -0.402916 | 0.354119 |
| C | -0.890273 | 0.465021  | 1.267995 |

|   |           |           |           |
|---|-----------|-----------|-----------|
| C | -2.256035 | 0.843710  | 1.234354  |
| C | -2.759771 | 1.570251  | 2.315553  |
| H | -3.818311 | 1.829134  | 2.318600  |
| C | -1.970034 | 1.992306  | 3.384691  |
| C | -0.604315 | 1.731262  | 3.309351  |
| H | 0.061238  | 2.128136  | 4.079900  |
| C | -0.042476 | 1.003628  | 2.260935  |
| C | -2.567243 | 2.720840  | 4.550120  |
| H | -2.965992 | 2.028530  | 5.305331  |
| H | -3.399285 | 3.365183  | 4.242407  |
| H | -1.826722 | 3.350875  | 5.057087  |
| C | -3.182652 | 0.497903  | 0.035344  |
| O | -2.536967 | 0.752171  | -1.216324 |
| C | -4.402753 | 1.437528  | 0.018604  |
| C | -4.227313 | 2.839863  | -0.238036 |
| C | -5.675638 | 0.953517  | 0.240041  |
| C | -2.960952 | 3.455434  | -0.425273 |
| C | -5.386944 | 3.683167  | -0.278806 |
| C | -6.811549 | 1.787764  | 0.195363  |
| H | -5.815894 | -0.103967 | 0.454987  |
| C | -2.847636 | 4.807353  | -0.652057 |
| H | -2.067689 | 2.840692  | -0.397148 |
| C | -5.234712 | 5.070543  | -0.521504 |
| C | -6.670785 | 3.125657  | -0.066013 |
| H | -7.796858 | 1.357797  | 0.367332  |
| C | -3.992652 | 5.627118  | -0.706157 |
| H | -1.858971 | 5.240517  | -0.797200 |
| H | -6.131596 | 5.689811  | -0.552053 |
| H | -7.539646 | 3.782974  | -0.106072 |
| H | -3.891466 | 6.695859  | -0.889871 |
| C | -3.616871 | -0.983279 | 0.113198  |
| C | -4.132373 | -1.675179 | -1.040494 |
| C | -3.500166 | -1.678000 | 1.300256  |
| C | -4.424568 | -1.041807 | -2.281996 |
| C | -4.404457 | -3.082699 | -0.938271 |
| C | -3.815002 | -3.048475 | 1.405788  |
| H | -3.111622 | -1.166534 | 2.177718  |
| C | -4.895623 | -1.761509 | -3.357245 |
| H | -4.267953 | 0.027656  | -2.372345 |
| C | -4.868510 | -3.792610 | -2.072839 |
| C | -4.230541 | -3.746256 | 0.301269  |
| H | -3.686111 | -3.551041 | 2.363203  |
| C | -5.103360 | -3.151931 | -3.264782 |
| H | -5.115277 | -1.244539 | -4.290018 |

|    |           |           |           |
|----|-----------|-----------|-----------|
| H  | -5.053548 | -4.862982 | -1.969816 |
| H  | -4.449948 | -4.813292 | 0.359695  |
| H  | -5.465389 | -3.709096 | -4.127253 |
| H  | -1.539405 | -2.758348 | -0.502372 |
| Si | -0.631899 | -3.477805 | 0.394518  |
| O  | 0.984067  | -3.117604 | 0.044664  |
| O  | -0.797820 | -3.062969 | 1.970235  |
| O  | -0.819766 | -5.100628 | 0.190829  |
| C  | 1.684195  | -3.814875 | -1.003680 |
| H  | 1.176778  | -3.672307 | -1.964408 |
| H  | 2.684831  | -3.377592 | -1.061376 |
| H  | 1.742153  | -4.878999 | -0.753927 |
| C  | -1.490350 | -5.664306 | -0.919896 |
| H  | -0.762430 | -6.061409 | -1.639815 |
| H  | -2.121270 | -6.488357 | -0.568381 |
| H  | -2.132266 | -4.932323 | -1.433204 |
| C  | -0.350698 | -3.930642 | 2.997380  |
| H  | -0.920888 | -4.868967 | 2.998600  |
| H  | 0.718072  | -4.169516 | 2.890983  |
| H  | -0.501372 | -3.419708 | 3.953696  |
| Zn | 1.434558  | -1.042553 | -0.066255 |
| O  | 3.231251  | -0.982021 | -0.676574 |
| N  | 2.157401  | -0.213967 | 1.808359  |
| C  | 1.456651  | 1.043303  | 2.117948  |
| H  | 1.699922  | 1.748308  | 1.315198  |
| H  | 1.890388  | 1.468319  | 3.043590  |
| C  | 2.060860  | -1.195017 | 2.903812  |
| H  | 2.256663  | -0.693807 | 3.871394  |
| H  | 1.045881  | -1.610073 | 2.936952  |
| C  | 3.151698  | -2.187957 | 2.570030  |
| H  | 2.814284  | -2.849601 | 1.760989  |
| H  | 3.428295  | -2.816583 | 3.423738  |
| C  | 4.290588  | -1.293522 | 2.080928  |
| H  | 4.908072  | -1.787311 | 1.324198  |
| H  | 4.951395  | -1.018841 | 2.912867  |
| C  | 3.615472  | -0.035251 | 1.505010  |
| H  | 3.959488  | 0.875097  | 2.024682  |
| C  | 3.835810  | 0.100032  | -0.048222 |
| C  | 5.329595  | 0.111897  | -0.373180 |
| C  | 6.304268  | 0.627554  | 0.479451  |
| H  | 6.030522  | 1.001910  | 1.466758  |
| C  | 7.651451  | 0.669957  | 0.115714  |
| H  | 8.380326  | 1.072439  | 0.814444  |
| C  | 8.041035  | 0.190048  | -1.134539 |

|    |           |           |           |
|----|-----------|-----------|-----------|
| C  | 7.075495  | -0.334040 | -2.000950 |
| H  | 7.398258  | -0.707810 | -2.970625 |
| C  | 5.744874  | -0.370521 | -1.620935 |
| H  | 4.992349  | -0.784462 | -2.288256 |
| O  | 9.324428  | 0.186218  | -1.597686 |
| C  | 10.308079 | 0.731834  | -0.750606 |
| H  | 10.102159 | 1.786852  | -0.515904 |
| H  | 10.390861 | 0.171049  | 0.192506  |
| H  | 11.251639 | 0.660899  | -1.295818 |
| C  | 3.224305  | 1.434423  | -0.523887 |
| C  | 2.168038  | 1.450797  | -1.442829 |
| C  | 3.634126  | 2.659967  | 0.005952  |
| C  | 1.487001  | 2.624183  | -1.744866 |
| H  | 1.885415  | 0.524752  | -1.943330 |
| C  | 2.971698  | 3.848384  | -0.289651 |
| H  | 4.484490  | 2.691255  | 0.689034  |
| C  | 1.869691  | 3.829711  | -1.151844 |
| H  | 0.655300  | 2.632570  | -2.448383 |
| H  | 3.314415  | 4.778499  | 0.157111  |
| O  | 1.129536  | 4.923245  | -1.485319 |
| C  | 1.490002  | 6.148747  | -0.888342 |
| H  | 2.506291  | 6.456896  | -1.174327 |
| H  | 0.773438  | 6.885647  | -1.257108 |
| H  | 1.428434  | 6.098218  | 0.208618  |
| Zn | -1.146221 | -0.374538 | -1.511785 |
| F  | 0.336013  | -1.275725 | -2.081982 |

### IM16

M06L SCF energy in Solvent: -6577.139753 a.u.

PBE0-D3BJ Free energy in Solvent: -6576.301188 a.u.

|   |          |           |           |
|---|----------|-----------|-----------|
| O | 0.608835 | 0.098770  | -0.510906 |
| C | 1.293082 | -0.367895 | -1.574954 |
| C | 2.691171 | -0.600502 | -1.537215 |
| C | 3.299067 | -1.064331 | -2.704171 |
| H | 4.370877 | -1.262330 | -2.689156 |
| C | 2.596078 | -1.322020 | -3.885695 |
| C | 1.212349 | -1.157336 | -3.864654 |
| H | 0.623451 | -1.408977 | -4.750172 |
| C | 0.555144 | -0.689588 | -2.729054 |
| C | 3.311260 | -1.773607 | -5.122943 |
| H | 3.680209 | -0.922731 | -5.712698 |
| H | 2.657238 | -2.357724 | -5.781419 |
| H | 4.185073 | -2.391496 | -4.884336 |
| C | 3.463208 | -0.507846 | -0.198774 |

|    |           |           |           |    |            |           |           |
|----|-----------|-----------|-----------|----|------------|-----------|-----------|
| O  | 3.239376  | 0.747934  | 0.423871  | C  | -1.977397  | -3.738591 | -1.031153 |
| C  | 4.979792  | -0.646108 | -0.408112 | H  | -1.752719  | -3.615807 | 0.038104  |
| C  | 5.719646  | 0.401952  | -1.049688 | H  | -1.935351  | -4.807687 | -1.265043 |
| C  | 5.656182  | -1.772617 | 0.015160  | C  | -3.316005  | -3.094864 | -1.364875 |
| C  | 5.115729  | 1.572824  | -1.579487 | H  | -4.061421  | -3.242647 | -0.579461 |
| C  | 7.138524  | 0.254792  | -1.204886 | H  | -3.725418  | -3.531791 | -2.284787 |
| C  | 7.051203  | -1.911219 | -0.135690 | C  | -3.006314  | -1.599051 | -1.591618 |
| H  | 5.102345  | -2.581810 | 0.486906  | H  | -3.418937  | -1.270104 | -2.559377 |
| C  | 5.866071  | 2.539547  | -2.208167 | C  | -3.572497  | -0.702475 | -0.429384 |
| H  | 4.044161  | 1.699944  | -1.467516 | C  | -5.036217  | -1.086076 | -0.191557 |
| C  | 7.880401  | 1.276039  | -1.847137 | C  | -5.986324  | -0.953025 | -1.203169 |
| C  | 7.780480  | -0.913498 | -0.728125 | H  | -5.687503  | -0.556723 | -2.175782 |
| H  | 7.540281  | -2.815371 | 0.223567  | C  | -7.321167  | -1.296710 | -1.002427 |
| C  | 7.262239  | 2.398658  | -2.340408 | H  | -8.034089  | -1.178152 | -1.814458 |
| H  | 5.374422  | 3.425770  | -2.607504 | C  | -7.725923  | -1.776050 | 0.246017  |
| H  | 8.958351  | 1.145694  | -1.947293 | C  | -6.785376  | -1.904882 | 1.271748  |
| H  | 8.860015  | -1.004671 | -0.850454 | H  | -7.121487  | -2.275265 | 2.238112  |
| H  | 7.844049  | 3.174504  | -2.835892 | C  | -5.458557  | -1.565151 | 1.051104  |
| C  | 2.926753  | -1.635854 | 0.733633  | H  | -4.720257  | -1.667860 | 1.843071  |
| C  | 3.111664  | -1.558634 | 2.158982  | O  | -9.004234  | -2.134758 | 0.558788  |
| C  | 2.200693  | -2.699338 | 0.227124  | C  | -9.969721  | -2.010971 | -0.459154 |
| C  | 3.948453  | -0.594818 | 2.793579  | H  | -10.071703 | -0.969819 | -0.799543 |
| C  | 2.440940  | -2.510219 | 3.000980  | H  | -9.730901  | -2.643907 | -1.326926 |
| C  | 1.567232  | -3.646702 | 1.056522  | H  | -10.914514 | -2.341443 | -0.022609 |
| H  | 2.106648  | -2.804274 | -0.852313 | C  | -3.574934  | 0.806536  | -0.732870 |
| C  | 4.067958  | -0.547973 | 4.164422  | C  | -3.765925  | 1.663469  | 0.364660  |
| H  | 4.497735  | 0.106629  | 2.174511  | C  | -3.475035  | 1.396854  | -1.990389 |
| C  | 2.580287  | -2.420982 | 4.407607  | C  | -3.791523  | 3.037889  | 0.225146  |
| C  | 1.661987  | -3.538596 | 2.421058  | H  | -3.885084  | 1.216921  | 1.350376  |
| H  | 0.997074  | -4.457393 | 0.602960  | C  | -3.480644  | 2.786289  | -2.155838 |
| C  | 3.367280  | -1.455276 | 4.984791  | H  | -3.383956  | 0.778855  | -2.883381 |
| H  | 4.725119  | 0.192792  | 4.617823  | C  | -3.626931  | 3.612917  | -1.042911 |
| H  | 2.051995  | -3.148522 | 5.024135  | H  | -3.911063  | 3.692745  | 1.086057  |
| H  | 1.156757  | -4.247077 | 3.077332  | H  | -3.375135  | 3.202520  | -3.154391 |
| H  | 3.466240  | -1.400897 | 6.067572  | O  | -3.627383  | 4.975229  | -1.082068 |
| Zn | -1.000479 | -0.711866 | 0.324659  | C  | -3.455236  | 5.575926  | -2.345438 |
| O  | -2.826773 | -0.940281 | 0.730761  | H  | -4.263555  | 5.302334  | -3.038817 |
| N  | -1.507828 | -1.537368 | -1.664839 | H  | -3.476394  | 6.654132  | -2.173604 |
| C  | -0.941312 | -0.602498 | -2.668170 | H  | -2.491483  | 5.297397  | -2.798695 |
| H  | -1.257599 | 0.410114  | -2.389139 | Si | -0.811778  | 2.728779  | 1.665879  |
| H  | -1.376741 | -0.828817 | -3.659271 | H  | -0.989948  | 1.859302  | 0.499094  |
| C  | -1.019981 | -2.918383 | -1.858086 | O  | -1.746756  | 2.470471  | 2.968210  |
| H  | -1.076757 | -3.193976 | -2.928280 | C  | -2.058246  | 1.210250  | 3.550312  |
| H  | 0.031726  | -2.987479 | -1.557225 | H  | -1.199846  | 0.813839  | 4.104389  |

|    |           |           |           |
|----|-----------|-----------|-----------|
| H  | -2.890288 | 1.376364  | 4.241552  |
| H  | -2.354881 | 0.473366  | 2.792190  |
| O  | -1.017413 | 4.321991  | 1.334949  |
| C  | -0.523688 | 4.870501  | 0.126955  |
| H  | 0.557862  | 5.057979  | 0.190354  |
| H  | -0.714738 | 4.209594  | -0.732895 |
| H  | -1.044323 | 5.816566  | -0.048110 |
| Zn | 1.542972  | 0.674638  | 1.193790  |
| O  | 0.842187  | 2.465233  | 1.978647  |
| C  | 1.548169  | 3.169956  | 3.004336  |
| H  | 2.618796  | 3.039984  | 2.822812  |
| H  | 1.295553  | 4.235268  | 2.964903  |
| H  | 1.288078  | 2.767454  | 3.990305  |
| F  | 0.021073  | -0.260087 | 1.998542  |

### TS11

M06L SCF energy in Solvent: -6577.116757 a.u.

PBE0-D3BJ Free energy in Solvent: -6576.280306 a.u.

|   |           |           |           |
|---|-----------|-----------|-----------|
| O | -0.473020 | -0.625437 | 0.207082  |
| C | -1.155130 | -1.747525 | -0.141383 |
| C | -2.553213 | -1.712411 | -0.350770 |
| C | -3.182236 | -2.910317 | -0.692544 |
| H | -4.256157 | -2.904931 | -0.873776 |
| C | -2.494043 | -4.117886 | -0.843243 |
| C | -1.108563 | -4.096862 | -0.703579 |
| H | -0.533378 | -5.009361 | -0.877581 |
| C | -0.427763 | -2.929394 | -0.363045 |
| C | -3.228757 | -5.383896 | -1.164576 |
| H | -3.696306 | -5.817448 | -0.269841 |
| H | -2.559818 | -6.146639 | -1.579650 |
| H | -4.035455 | -5.214857 | -1.887956 |
| C | -3.311781 | -0.364907 | -0.342658 |
| O | -3.133357 | 0.317440  | 0.897872  |
| C | -4.827278 | -0.593911 | -0.498643 |
| C | -5.597252 | -1.140611 | 0.581952  |
| C | -5.466638 | -0.303218 | -1.687484 |
| C | -5.031165 | -1.578809 | 1.808643  |
| C | -7.012922 | -1.304788 | 0.409269  |
| C | -6.855758 | -0.472611 | -1.853951 |
| H | -4.888212 | 0.081683  | -2.524883 |
| C | -5.812611 | -2.115945 | 2.805064  |
| H | -3.961872 | -1.475085 | 1.954420  |
| C | -7.789139 | -1.844403 | 1.464153  |
| C | -7.618074 | -0.948534 | -0.819388 |

|    |           |           |           |
|----|-----------|-----------|-----------|
| H  | -7.314770 | -0.214728 | -2.807001 |
| C  | -7.206803 | -2.241953 | 2.642265  |
| H  | -5.346707 | -2.446221 | 3.732380  |
| H  | -8.863970 | -1.947474 | 1.312521  |
| H  | -8.695380 | -1.075214 | -0.928357 |
| H  | -7.814718 | -2.660189 | 3.443135  |
| C  | -2.771843 | 0.528451  | -1.492955 |
| C  | -3.144454 | 1.914867  | -1.576309 |
| C  | -1.927159 | 0.021635  | -2.465897 |
| C  | -4.073999 | 2.533825  | -0.694218 |
| C  | -2.605560 | 2.718684  | -2.639686 |
| C  | -1.366296 | 0.824134  | -3.479920 |
| H  | -1.694867 | -1.041512 | -2.460956 |
| C  | -4.449498 | 3.847041  | -0.859700 |
| H  | -4.494769 | 1.949940  | 0.117152  |
| C  | -3.010811 | 4.070844  | -2.772797 |
| C  | -1.691971 | 2.154439  | -3.560051 |
| H  | -0.694926 | 0.372568  | -4.210149 |
| C  | -3.918347 | 4.627898  | -1.905981 |
| H  | -5.171023 | 4.285416  | -0.172321 |
| H  | -2.587625 | 4.656815  | -3.588961 |
| H  | -1.277096 | 2.788266  | -4.343573 |
| H  | -4.226988 | 5.665497  | -2.024256 |
| Zn | 1.063018  | 0.063321  | -0.736230 |
| O  | 2.852285  | 0.485201  | -1.064362 |
| N  | 1.599766  | -1.996453 | -1.393750 |
| C  | 1.072114  | -2.888492 | -0.334064 |
| H  | 1.439540  | -2.515453 | 0.629588  |
| H  | 1.484084  | -3.904889 | -0.474315 |
| C  | 1.146597  | -2.391986 | -2.740004 |
| H  | 1.286639  | -3.481269 | -2.879551 |
| H  | 0.076592  | -2.183282 | -2.857546 |
| C  | 2.054738  | -1.601925 | -3.651620 |
| H  | 1.741666  | -0.548521 | -3.669163 |
| H  | 2.049711  | -1.971268 | -4.682473 |
| C  | 3.409594  | -1.731887 | -2.962561 |
| H  | 4.052793  | -0.867156 | -3.148645 |
| H  | 3.941988  | -2.620787 | -3.323892 |
| C  | 3.093260  | -1.877138 | -1.462000 |
| H  | 3.526140  | -2.805439 | -1.054738 |
| C  | 3.577651  | -0.633290 | -0.641595 |
| C  | 5.064975  | -0.370523 | -0.877901 |
| C  | 6.005260  | -1.388367 | -1.027712 |
| H  | 5.688449  | -2.432299 | -1.039719 |



|    |           |           |           |
|----|-----------|-----------|-----------|
| C  | 7.364182  | -1.112184 | -1.180379 |
| H  | 8.065796  | -1.933073 | -1.303827 |
| C  | 7.800867  | 0.213328  | -1.178813 |
| C  | 6.868039  | 1.244719  | -1.028490 |
| H  | 7.225878  | 2.272241  | -1.033755 |
| C  | 5.522823  | 0.952114  | -0.879379 |
| H  | 4.791273  | 1.749376  | -0.770462 |
| O  | 9.101239  | 0.599089  | -1.320437 |
| C  | 10.057797 | -0.424892 | -1.463387 |
| H  | 10.073024 | -1.091978 | -0.588650 |
| H  | 9.875518  | -1.028787 | -2.364722 |
| H  | 11.024992 | 0.073698  | -1.554042 |
| C  | 3.386500  | -0.879186 | 0.869126  |
| C  | 2.769307  | 0.095578  | 1.662032  |
| C  | 3.827593  | -2.039566 | 1.509892  |
| C  | 2.546021  | -0.094382 | 3.019374  |
| H  | 2.498861  | 1.042774  | 1.194889  |
| C  | 3.613037  | -2.253620 | 2.868577  |
| H  | 4.350072  | -2.811502 | 0.943016  |
| C  | 2.956737  | -1.281031 | 3.631338  |
| H  | 2.071592  | 0.680192  | 3.620084  |
| H  | 3.962366  | -3.176904 | 3.323664  |
| O  | 2.691456  | -1.394151 | 4.961273  |
| C  | 3.108718  | -2.579158 | 5.601416  |
| H  | 4.199916  | -2.705736 | 5.550163  |
| H  | 2.805726  | -2.480569 | 6.645597  |
| H  | 2.626750  | -3.466688 | 5.165698  |
| Si | 0.458825  | 2.855478  | 1.569673  |
| H  | -0.200298 | 1.488597  | 2.130895  |
| O  | 1.871402  | 3.253943  | 0.815381  |
| C  | 3.006633  | 3.773871  | 1.481549  |
| H  | 3.686149  | 4.152376  | 0.711101  |
| H  | 2.747262  | 4.584717  | 2.171673  |
| H  | 3.520533  | 2.988196  | 2.052007  |
| O  | 0.959876  | 3.093267  | 3.157387  |
| C  | 0.069717  | 2.958272  | 4.234191  |
| H  | -0.634559 | 3.800440  | 4.278949  |
| H  | -0.519314 | 2.025133  | 4.167966  |
| H  | 0.650346  | 2.925286  | 5.162816  |
| Zn | -1.407831 | 0.926450  | 1.085536  |
| O  | -0.853907 | 3.842146  | 1.389716  |
| C  | -1.113680 | 4.582809  | 0.208972  |
| H  | -1.998315 | 5.199175  | 0.392450  |
| H  | -0.266150 | 5.234356  | -0.042282 |

|   |           |          |           |
|---|-----------|----------|-----------|
| H | -1.315594 | 3.922309 | -0.641582 |
| F | 0.084757  | 1.948019 | -0.059772 |

### **FSi(OMe)<sub>3</sub>**

M06L SCF energy in Solvent: -734.542700 a.u.

PBE0-D3BJ Free energy in Solvent: -734.447258 a.u.

|    |           |           |           |
|----|-----------|-----------|-----------|
| Si | -0.073787 | -0.032357 | 0.323733  |
| O  | 1.159824  | -1.079966 | 0.532028  |
| O  | -1.400137 | -0.832181 | -0.182381 |
| O  | 0.239639  | 1.141601  | -0.778108 |
| C  | 1.620451  | -1.877196 | -0.543003 |
| H  | 2.466754  | -2.469198 | -0.182377 |
| H  | 0.836848  | -2.559247 | -0.898181 |
| H  | 1.958210  | -1.259921 | -1.388375 |
| C  | -2.558942 | -0.153621 | -0.633650 |
| H  | -2.319553 | 0.559181  | -1.432857 |
| H  | -3.255477 | -0.902781 | -1.021010 |
| H  | -3.048252 | 0.385482  | 0.188847  |
| C  | 1.305374  | 2.052097  | -0.580992 |
| H  | 1.350169  | 2.713510  | -1.451106 |
| H  | 1.148956  | 2.662539  | 0.318433  |
| H  | 2.268574  | 1.530343  | -0.485721 |
| F  | -0.285457 | 0.647753  | 1.754849  |

### **TS10b**

M06L SCF energy in Solvent: -6533.49219 a.u.

PBE0-D3BJ Free energy in Solvent: --6532.556347 a.u.

|   |           |           |           |
|---|-----------|-----------|-----------|
| O | -0.514800 | -0.540275 | -0.320656 |
| C | -1.023547 | -1.681170 | -0.829904 |
| C | -2.421268 | -1.918352 | -0.841148 |
| C | -2.883230 | -3.080462 | -1.459702 |
| H | -3.958096 | -3.255138 | -1.497428 |
| C | -2.041151 | -4.027311 | -2.046461 |
| C | -0.673609 | -3.781414 | -1.996735 |
| H | 0.020947  | -4.504568 | -2.431152 |
| C | -0.149046 | -2.639961 | -1.391272 |
| C | -2.596286 | -5.265555 | -2.682963 |
| H | -3.423995 | -5.038726 | -3.366862 |
| H | -2.992774 | -5.965447 | -1.934882 |
| H | -1.830635 | -5.802295 | -3.255045 |
| C | -3.425127 | -0.883627 | -0.272511 |
| O | -3.000186 | -0.379692 | 0.986037  |
| C | -4.787997 | -1.567460 | -0.033405 |
| C | -4.935511 | -2.528030 | 1.022559  |

|   |           |           |           |    |           |           |           |
|---|-----------|-----------|-----------|----|-----------|-----------|-----------|
| C | -5.871576 | -1.309513 | -0.849454 | H  | 3.873211  | 0.913783  | -2.385152 |
| C | -3.866950 | -2.938950 | 1.863211  | H  | 4.571668  | -0.308389 | -3.439801 |
| C | -6.214403 | -3.147797 | 1.222428  | C  | 3.379857  | -1.113134 | -1.798518 |
| C | -7.126467 | -1.918910 | -0.647299 | H  | 3.855127  | -2.076673 | -2.056096 |
| H | -5.764682 | -0.614248 | -1.679382 | C  | 3.812730  | -0.655033 | -0.357491 |
| C | -4.055090 | -3.883068 | 2.846436  | C  | 5.262035  | -0.149942 | -0.407715 |
| H | -2.891787 | -2.483475 | 1.727765  | C  | 6.247069  | -0.727212 | -1.208035 |
| C | -6.374479 | -4.105840 | 2.253067  | H  | 5.998485  | -1.556575 | -1.871605 |
| C | -7.298902 | -2.812797 | 0.377103  | C  | 7.563315  | -0.266126 | -1.205030 |
| H | -7.953712 | -1.670577 | -1.310437 | H  | 8.296043  | -0.738278 | -1.854597 |
| C | -5.319525 | -4.469792 | 3.053434  | C  | 7.916693  | 0.797683  | -0.374332 |
| H | -3.214354 | -4.178637 | 3.472312  | C  | 6.944053  | 1.381271  | 0.444007  |
| H | -7.358115 | -4.556181 | 2.389900  | H  | 7.237079  | 2.208033  | 1.088086  |
| H | -8.264074 | -3.289984 | 0.549045  | C  | 5.641361  | 0.910470  | 0.423018  |
| H | -5.455295 | -5.211939 | 3.838767  | H  | 4.883926  | 1.363477  | 1.059566  |
| C | -3.575037 | 0.294169  | -1.274269 | O  | 9.167885  | 1.334150  | -0.292415 |
| C | -4.337968 | 1.464069  | -0.918417 | C  | 10.165302 | 0.749616  | -1.097149 |
| C | -2.996524 | 0.246650  | -2.530433 | H  | 10.318612 | -0.311088 | -0.848498 |
| C | -4.987190 | 1.621377  | 0.336774  | H  | 9.923657  | 0.829612  | -2.167531 |
| C | -4.487735 | 2.518938  | -1.880843 | H  | 11.083427 | 1.304171  | -0.892339 |
| C | -3.134054 | 1.293165  | -3.465410 | C  | 3.775126  | -1.834981 | 0.631477  |
| H | -2.433248 | -0.637465 | -2.821285 | C  | 3.065170  | -1.729119 | 1.832727  |
| C | -5.714979 | 2.753329  | 0.625769  | C  | 4.446145  | -3.032066 | 0.380439  |
| H | -4.887525 | 0.832120  | 1.074839  | C  | 3.008858  | -2.783016 | 2.732521  |
| C | -5.244584 | 3.668978  | -1.547159 | H  | 2.532987  | -0.804316 | 2.043923  |
| C | -3.875749 | 2.403399  | -3.153048 | C  | 4.398758  | -4.103623 | 1.268741  |
| H | -2.659455 | 1.202059  | -4.441374 | H  | 5.035144  | -3.145443 | -0.530528 |
| C | -5.845227 | 3.791443  | -0.318075 | C  | 3.672550  | -3.981346 | 2.456073  |
| H | -6.199928 | 2.843871  | 1.596457  | H  | 2.448097  | -2.702623 | 3.661430  |
| H | -5.343147 | 4.456935  | -2.294945 | H  | 4.933440  | -5.019861 | 1.031111  |
| H | -4.005901 | 3.212682  | -3.873098 | O  | 3.555132  | -4.961163 | 3.396138  |
| H | -6.424617 | 4.680651  | -0.075166 | C  | 4.205176  | -6.182401 | 3.130751  |
| O | 2.983902  | 0.380205  | 0.062569  | H  | 5.293888  | -6.052958 | 3.040094  |
| N | 1.901679  | -1.289650 | -1.908421 | H  | 3.988737  | -6.831256 | 3.981772  |
| C | 1.343630  | -2.508683 | -1.278267 | H  | 3.827108  | -6.651883 | 2.210493  |
| H | 1.639252  | -2.486643 | -0.222349 | Zn | 1.237350  | 0.257040  | -0.671156 |
| H | 1.832485  | -3.393820 | -1.723692 | Zn | -1.602648 | 0.818790  | 0.718154  |
| C | 1.601664  | -1.180176 | -3.343411 | C  | 1.238501  | 1.822255  | 1.920052  |
| H | 1.926175  | -2.102768 | -3.859809 | O  | 0.468851  | 0.872788  | 1.935150  |
| H | 0.520328  | -1.075784 | -3.491929 | C  | 1.079286  | 3.111372  | 1.134414  |
| C | 2.421988  | 0.024369  | -3.764524 | C  | 0.202177  | 2.926906  | -0.119904 |
| H | 1.856317  | 0.944181  | -3.562002 | O  | 0.559082  | 2.108137  | -1.028343 |
| H | 2.652827  | 0.017496  | -4.834516 | O  | -0.356508 | 4.098748  | -0.487893 |
| C | 3.672471  | -0.048456 | -2.871947 | C  | -1.214552 | 3.995685  | -1.636084 |

|   |           |          |           |
|---|-----------|----------|-----------|
| H | -1.925191 | 3.176484 | -1.439037 |
| H | -0.616859 | 3.710978 | -2.510756 |
| C | -1.913797 | 5.314422 | -1.810470 |
| H | -2.518941 | 5.556922 | -0.930755 |
| H | -2.579081 | 5.267926 | -2.679676 |
| H | -1.196116 | 6.126156 | -1.972304 |
| C | 2.477615  | 3.511890 | 0.639766  |
| H | 2.420786  | 4.408749 | 0.015151  |
| H | 2.920731  | 2.698142 | 0.056217  |
| H | 3.133680  | 3.725516 | 1.492227  |
| C | 0.486557  | 4.115381 | 2.124777  |
| C | 1.000106  | 5.411081 | 2.238653  |
| C | -0.596750 | 3.754132 | 2.935689  |
| C | 0.433970  | 6.324453 | 3.121178  |
| H | 1.843064  | 5.718663 | 1.624791  |
| C | -1.163397 | 4.668282 | 3.818672  |
| H | -1.005016 | 2.746379 | 2.882106  |
| C | -0.649940 | 5.957405 | 3.914665  |
| H | 0.845707  | 7.329900 | 3.189413  |
| H | -2.006364 | 4.365404 | 4.436638  |
| H | -1.087345 | 6.671973 | 4.609271  |
| H | -1.080766 | 2.342275 | 0.536613  |
| H | 2.141310  | 1.800743 | 2.568247  |

### TS5c

M06L SCF energy in Solvent: -6687.257757 a.u.

PBE0-D3BJ Free energy in Solvent: -6686.260870 a.u.

|   |           |           |           |
|---|-----------|-----------|-----------|
| O | -1.067146 | -0.631093 | 0.001066  |
| C | -1.775420 | -1.708921 | -0.412034 |
| C | -3.178088 | -1.644609 | -0.624738 |
| C | -3.828270 | -2.790470 | -1.079766 |
| H | -4.900613 | -2.739547 | -1.265711 |
| C | -3.167200 | -3.995579 | -1.328430 |
| C | -1.787053 | -4.016522 | -1.152462 |
| H | -1.228416 | -4.926501 | -1.383776 |
| C | -1.081149 | -2.900426 | -0.704466 |
| C | -3.920511 | -5.210547 | -1.777800 |
| H | -3.253457 | -5.958566 | -2.221999 |
| H | -4.688091 | -4.963135 | -2.521392 |
| H | -4.440776 | -5.698387 | -0.941924 |
| C | -3.930015 | -0.306268 | -0.454584 |
| O | -3.718242 | 0.198375  | 0.861711  |
| C | -5.449851 | -0.464401 | -0.620664 |
| C | -6.220896 | -1.164666 | 0.367292  |

|   |           |           |           |
|---|-----------|-----------|-----------|
| C | -6.098940 | 0.063024  | -1.719192 |
| C | -5.651325 | -1.797617 | 1.504195  |
| C | -7.640338 | -1.274330 | 0.185773  |
| C | -7.494661 | -0.041384 | -1.887973 |
| H | -5.523132 | 0.579957  | -2.484067 |
| C | -6.433579 | -2.482582 | 2.405050  |
| H | -4.580415 | -1.722733 | 1.661399  |
| C | -8.415116 | -1.977726 | 1.140083  |
| C | -8.252407 | -0.692061 | -0.950106 |
| H | -7.960847 | 0.399657  | -2.767644 |
| C | -7.829055 | -2.572707 | 2.230064  |
| H | -5.966458 | -2.960148 | 3.265204  |
| H | -9.492357 | -2.041963 | 0.983520  |
| H | -9.332859 | -0.781169 | -1.065260 |
| H | -8.435916 | -3.115008 | 2.953689  |
| C | -3.361975 | 0.697891  | -1.502901 |
| C | -3.460104 | 2.121023  | -1.309257 |
| C | -2.705252 | 0.238792  | -2.630418 |
| C | -4.250574 | 2.726703  | -0.288172 |
| C | -2.757500 | 2.995680  | -2.209909 |
| C | -2.046832 | 1.100958  | -3.527584 |
| H | -2.675954 | -0.832740 | -2.819750 |
| C | -4.291079 | 4.093802  | -0.134766 |
| H | -4.827825 | 2.087101  | 0.371008  |
| C | -2.814562 | 4.397358  | -2.009010 |
| C | -2.042309 | 2.453870  | -3.302673 |
| H | -1.520520 | 0.679226  | -4.383403 |
| C | -3.555381 | 4.941083  | -0.988164 |
| H | -4.911561 | 4.524745  | 0.649221  |
| H | -2.264333 | 5.038848  | -2.698226 |
| H | -1.508847 | 3.132869  | -3.968477 |
| H | -3.591071 | 6.020364  | -0.849128 |
| O | 2.797459  | -0.025243 | -0.388906 |
| N | 1.068623  | -1.912924 | -1.434293 |
| C | 0.418220  | -2.963555 | -0.616234 |
| H | 0.761782  | -2.843567 | 0.420968  |
| H | 0.765175  | -3.959690 | -0.948520 |
| C | 0.474475  | -1.780349 | -2.776102 |
| H | 0.408485  | -2.771651 | -3.264005 |
| H | -0.539651 | -1.375847 | -2.699319 |
| C | 1.445690  | -0.869277 | -3.485350 |
| H | 1.276408  | 0.161737  | -3.142825 |
| H | 1.327070  | -0.885499 | -4.574571 |
| C | 2.801980  | -1.384492 | -3.010881 |



|   |           |           |           |    |           |           |           |
|---|-----------|-----------|-----------|----|-----------|-----------|-----------|
| H | -3.657803 | -6.136391 | -1.122665 | H  | 1.014762  | -2.633935 | -3.346239 |
| H | -2.417685 | -6.285265 | -2.369907 | H  | -0.114290 | -1.399503 | -2.738330 |
| C | -3.644414 | -0.716516 | -0.609743 | C  | 1.819651  | -0.611178 | -3.406692 |
| O | -3.512047 | -0.201176 | 0.710383  | H  | 1.514021  | 0.367964  | -3.009384 |
| C | -5.142256 | -0.999931 | -0.819828 | H  | 1.741899  | -0.568198 | -4.498762 |
| C | -5.886183 | -1.750009 | 0.152367  | C  | 3.210988  | -0.991303 | -2.908174 |
| C | -5.798271 | -0.536053 | -1.942777 | H  | 3.851147  | -0.117061 | -2.746193 |
| C | -5.302619 | -2.335100 | 1.307546  | H  | 3.725843  | -1.628790 | -3.637595 |
| C | -7.289387 | -1.962222 | -0.063263 | C  | 2.989752  | -1.767447 | -1.592648 |
| C | -7.176331 | -0.747906 | -2.149429 | H  | 3.372052  | -2.799032 | -1.684129 |
| H | -5.242445 | 0.016768  | -2.696935 | C  | 3.648618  | -1.038438 | -0.364905 |
| C | -6.057428 | -3.064189 | 2.197202  | C  | 5.109191  | -0.702404 | -0.690673 |
| H | -4.242960 | -2.188915 | 1.486780  | C  | 6.001421  | -1.622008 | -1.241071 |
| C | -8.037223 | -2.707700 | 0.880558  | H  | 5.669721  | -2.634378 | -1.474969 |
| C | -7.910868 | -1.439829 | -1.222743 | C  | 7.324024  | -1.283128 | -1.526202 |
| H | -7.648065 | -0.353891 | -3.048267 | H  | 7.984941  | -2.029569 | -1.959244 |
| C | -7.439231 | -3.249368 | 1.991561  | C  | 7.777573  | 0.009057  | -1.255840 |
| H | -5.579334 | -3.502965 | 3.071959  | C  | 6.893918  | 0.945834  | -0.712844 |
| H | -9.102977 | -2.849248 | 0.698032  | H  | 7.261547  | 1.950929  | -0.513407 |
| H | -8.978552 | -1.608924 | -1.365302 | C  | 5.582409  | 0.590051  | -0.437415 |
| H | -8.025446 | -3.824631 | 2.706671  | H  | 4.888293  | 1.318739  | -0.023626 |
| C | -3.138401 | 0.336767  | -1.640587 | O  | 9.048073  | 0.448574  | -1.489993 |
| C | -3.399452 | 1.742168  | -1.468199 | C  | 9.957313  | -0.487498 | -2.019441 |
| C | -2.404375 | -0.056810 | -2.744427 | H  | 10.083712 | -1.352887 | -1.352215 |
| C | -4.285854 | 2.264474  | -0.481239 | H  | 9.640358  | -0.849155 | -3.009135 |
| C | -2.789510 | 2.679406  | -2.374223 | H  | 10.910727 | 0.036116  | -2.116175 |
| C | -1.817088 | 0.863986  | -3.633012 | C  | 3.604862  | -1.953288 | 0.874919  |
| H | -2.256876 | -1.120340 | -2.923064 | C  | 3.111254  | -1.459300 | 2.088642  |
| C | -4.528804 | 3.615440  | -0.382910 | C  | 4.023071  | -3.286267 | 0.849045  |
| H | -4.781737 | 1.572435  | 0.191046  | C  | 3.009549  | -2.265529 | 3.213754  |
| C | -3.050097 | 4.064669  | -2.227325 | H  | 2.789284  | -0.422159 | 2.144162  |
| C | -1.979512 | 2.211122  | -3.434208 | C  | 3.932064  | -4.110647 | 1.968004  |
| H | -1.224953 | 0.495106  | -4.469972 | H  | 4.428248  | -3.717602 | -0.066132 |
| C | -3.904735 | 4.528227  | -1.257139 | C  | 3.415647  | -3.600519 | 3.162080  |
| H | -5.223996 | 3.980093  | 0.371255  | H  | 2.616711  | -1.875156 | 4.150475  |
| H | -2.576461 | 4.755117  | -2.925857 | H  | 4.263093  | -5.143835 | 1.898820  |
| H | -1.521832 | 2.938638  | -4.105008 | O  | 3.275707  | -4.317932 | 4.312558  |
| H | -4.116182 | 5.593689  | -1.174780 | C  | 3.688515  | -5.664608 | 4.279224  |
| O | 2.957711  | 0.144148  | -0.143989 | H  | 4.760210  | -5.755797 | 4.048249  |
| N | 1.503270  | -1.825621 | -1.443275 | H  | 3.500447  | -6.064052 | 5.277821  |
| C | 0.932513  | -2.977482 | -0.707598 | H  | 3.116961  | -6.247283 | 3.541692  |
| H | 1.256297  | -2.900420 | 0.341755  | Zn | 1.089584  | -0.220729 | 0.001298  |
| H | 1.363664  | -3.920075 | -1.094543 | Zn | -1.865639 | 0.658185  | 0.800411  |
| C | 0.942697  | -1.676017 | -2.796185 | C  | 0.206335  | 1.756858  | 2.022862  |

|                                                     |           |          |           |   |          |           |           |
|-----------------------------------------------------|-----------|----------|-----------|---|----------|-----------|-----------|
| O                                                   | 0.598384  | 0.540310 | 1.877929  | H | 4.133034 | 2.595870  | -1.818307 |
| O                                                   | -0.172997 | 2.149939 | 3.286978  | C | 2.281021 | 3.586253  | -2.211889 |
| C                                                   | -0.907548 | 1.148947 | 3.979576  | C | 0.898602 | 3.492693  | -2.075355 |
| H                                                   | -0.276828 | 0.264856 | 4.132611  | H | 0.256585 | 4.248018  | -2.534990 |
| H                                                   | -1.747129 | 0.829787 | 3.319953  | C | 0.303755 | 2.448916  | -1.370414 |
| C                                                   | -1.419496 | 1.738203 | 5.265357  | C | 2.921882 | 4.735653  | -2.929054 |
| H                                                   | -0.587995 | 2.053569 | 5.904526  | H | 3.285877 | 5.499002  | -2.227404 |
| H                                                   | -2.009430 | 0.996500 | 5.813399  | H | 2.218757 | 5.233204  | -3.607309 |
| H                                                   | -2.051631 | 2.610969 | 5.073150  | H | 3.788449 | 4.415762  | -3.520155 |
| C                                                   | 1.063443  | 2.892965 | 1.390539  | C | 3.411855 | 0.299465  | -0.513718 |
| C                                                   | 2.444996  | 2.788247 | 2.055154  | O | 3.186793 | -0.069759 | 0.844817  |
| H                                                   | 3.089008  | 3.611562 | 1.733351  | C | 4.899895 | 0.679404  | -0.616473 |
| H                                                   | 2.919007  | 1.841851 | 1.771112  | C | 5.470979 | 1.609426  | 0.314642  |
| H                                                   | 2.340994  | 2.815151 | 3.144189  | C | 5.702981 | 0.153961  | -1.608425 |
| C                                                   | 0.397948  | 4.251578 | 1.551148  | C | 4.717967 | 2.281005  | 1.314028  |
| C                                                   | 0.839795  | 5.170814 | 2.505036  | C | 6.868830 | 1.919016  | 0.214246  |
| C                                                   | -0.705504 | 4.587218 | 0.756456  | C | 7.074069 | 0.466323  | -1.706675 |
| C                                                   | 0.196911  | 6.393886 | 2.664344  | H | 5.273544 | -0.530695 | -2.337393 |
| H                                                   | 1.691536  | 4.930718 | 3.137136  | C | 5.311309 | 3.177790  | 2.171896  |
| C                                                   | -1.348635 | 5.810540 | 0.917260  | H | 3.658160 | 2.066652  | 1.399128  |
| H                                                   | -1.068483 | 3.890466 | -0.002763 | C | 7.448804 | 2.835575  | 1.125309  |
| C                                                   | -0.899952 | 6.719145 | 1.871427  | C | 7.649995 | 1.322007  | -0.803819 |
| H                                                   | 0.558001  | 7.096759 | 3.413354  | H | 7.668503 | 0.016988  | -2.500482 |
| H                                                   | -2.204030 | 6.048013 | 0.287166  | C | 6.690575 | 3.454099  | 2.088453  |
| H                                                   | -1.400664 | 7.677940 | 1.994573  | H | 4.706259 | 3.679020  | 2.926017  |
| C                                                   | 1.224073  | 2.598802 | -0.094415 | H | 8.514926 | 3.046749  | 1.036139  |
| O                                                   | 0.515285  | 1.814960 | -0.732617 | H | 8.710645 | 1.567748  | -0.861341 |
| O                                                   | 2.217021  | 3.276077 | -0.638491 | H | 7.147964 | 4.160589  | 2.779355  |
| C                                                   | 2.561213  | 2.913633 | -2.004434 | C | 3.087332 | -0.925595 | -1.413037 |
| H                                                   | 1.678513  | 3.075355 | -2.635535 | C | 3.569606 | -2.236769 | -1.061839 |
| H                                                   | 2.792261  | 1.841603 | -1.987188 | C | 2.314403 | -0.797467 | -2.552963 |
| C                                                   | 3.738503  | 3.755124 | -2.405676 | C | 4.480272 | -2.478714 | 0.005062  |
| H                                                   | 3.499255  | 4.823282 | -2.373274 | C | 3.164328 | -3.363382 | -1.856415 |
| H                                                   | 4.040631  | 3.502358 | -3.427461 | C | 1.931090 | -1.904874 | -3.337069 |
| H                                                   | 4.593510  | 3.570799 | -1.746762 | H | 1.996725 | 0.195829  | -2.863642 |
| H                                                   | -0.986984 | 1.950780 | 1.385408  | C | 4.925946 | -3.749341 | 0.287237  |
|                                                     |           |          |           | H | 4.815482 | -1.640493 | 0.606139  |
|                                                     |           |          |           | C | 3.622327 | -4.660801 | -1.516421 |
|                                                     |           |          |           | C | 2.333231 | -3.168335 | -2.985803 |
|                                                     |           |          |           | H | 1.315831 | -1.745349 | -4.222377 |
|                                                     |           |          |           | C | 4.483584 | -4.856305 | -0.464885 |
|                                                     |           |          |           | H | 5.627424 | -3.899298 | 1.106628  |
|                                                     |           |          |           | H | 3.289266 | -5.501451 | -2.125617 |
|                                                     |           |          |           | H | 2.038472 | -4.036589 | -3.575541 |
| <b>TS4'</b>                                         |           |          |           |   |          |           |           |
| M06L SCF energy in Solvent: -6556.424852 a.u.       |           |          |           |   |          |           |           |
| PBE0-D3BJ Free energy in Solvent: -6558.644628 a.u. |           |          |           |   |          |           |           |
| O                                                   | 0.505043  | 0.457034 | -0.103315 |   |          |           |           |
| C                                                   | 1.109002  | 1.458010 | -0.778682 |   |          |           |           |
| C                                                   | 2.516808  | 1.488213 | -0.950011 |   |          |           |           |
| C                                                   | 3.055579  | 2.562086 | -1.661689 |   |          |           |           |



|    |           |           |           |   |            |           |           |
|----|-----------|-----------|-----------|---|------------|-----------|-----------|
| H  | 3.223666  | 0.373082  | -6.349662 | C | -2.498293  | -3.381717 | 1.293869  |
| H  | 3.009302  | 2.060523  | -5.900387 | H | -2.463486  | -3.576554 | 2.373387  |
| H  | 1.681302  | 1.181287  | -6.664834 | H | -3.290844  | -2.660475 | 1.071949  |
| C  | 3.484872  | -0.410412 | -1.189222 | H | -2.671797  | -4.323616 | 0.760652  |
| O  | 3.187998  | 0.303934  | 0.003287  | C | 1.491840   | -2.412155 | 3.421058  |
| C  | 4.909238  | 0.024576  | -1.577009 | H | 2.059611   | -2.894081 | 4.224455  |
| C  | 5.240221  | 1.419950  | -1.650582 | H | 2.221804   | -2.079120 | 2.659788  |
| C  | 5.895001  | -0.906009 | -1.835215 | H | 0.975019   | -1.528048 | 3.811897  |
| C  | 4.289262  | 2.465598  | -1.494112 | C | 0.695862   | -6.085212 | 1.640777  |
| C  | 6.594272  | 1.794969  | -1.941879 | H | 1.638486   | -5.738033 | 2.086551  |
| C  | 7.223510  | -0.531735 | -2.123007 | H | 0.070237   | -6.497528 | 2.442383  |
| H  | 5.648263  | -1.965572 | -1.808162 | H | 0.916502   | -6.880419 | 0.919785  |
| C  | 4.654966  | 3.786865  | -1.612147 | O | -3.161168  | -0.477589 | 0.211529  |
| H  | 3.255959  | 2.211154  | -1.278192 | N | -1.849766  | -0.966032 | -2.180987 |
| C  | 6.939908  | 3.166525  | -2.025626 | C | -1.312996  | 0.274271  | -2.771500 |
| C  | 7.570555  | 0.793449  | -2.161453 | H | -1.555926  | 1.096874  | -2.079269 |
| H  | 7.968676  | -1.303943 | -2.306588 | H | -1.858437  | 0.499117  | -3.708730 |
| C  | 5.993297  | 4.148762  | -1.866934 | C | -1.407899  | -2.173892 | -2.891113 |
| H  | 3.897120  | 4.562392  | -1.506285 | H | -1.536558  | -2.037058 | -3.981993 |
| H  | 7.978104  | 3.423983  | -2.237103 | H | -0.341561  | -2.345469 | -2.699687 |
| H  | 8.594880  | 1.098966  | -2.375941 | C | -2.315333  | -3.263851 | -2.351734 |
| H  | 6.269989  | 5.199127  | -1.944946 | H | -1.869286  | -3.705455 | -1.451881 |
| C  | 3.425859  | -1.929435 | -0.892928 | H | -2.451065  | -4.075296 | -3.074562 |
| C  | 3.973434  | -2.468057 | 0.324702  | C | -3.623427  | -2.535506 | -2.012747 |
| C  | 2.808845  | -2.795268 | -1.776557 | H | -3.963090  | -2.771777 | -0.998231 |
| C  | 4.714146  | -1.699701 | 1.268852  | H | -4.442880  | -2.815104 | -2.683859 |
| C  | 3.793956  | -3.866811 | 0.607414  | C | -3.326133  | -1.030978 | -2.132574 |
| C  | 2.656899  | -4.168870 | -1.505305 | H | -3.726840  | -0.646208 | -3.089564 |
| H  | 2.408423  | -2.398043 | -2.707352 | C | -3.894886  | -0.198300 | -0.930809 |
| C  | 5.196645  | -2.263559 | 2.428383  | C | -5.356478  | -0.632484 | -0.715519 |
| H  | 4.883559  | -0.647556 | 1.064960  | C | -6.308376  | -0.558441 | -1.732429 |
| C  | 4.296444  | -4.407630 | 1.817672  | H | -6.028958  | -0.175291 | -2.714332 |
| C  | 3.129657  | -4.694549 | -0.329379 | C | -7.627533  | -0.962507 | -1.537843 |
| H  | 2.148313  | -4.804835 | -2.228585 | H | -8.336202  | -0.887522 | -2.358867 |
| C  | 4.977117  | -3.625261 | 2.718287  | C | -8.021618  | -1.450685 | -0.290115 |
| H  | 5.758268  | -1.646496 | 3.127876  | C | -7.080848  | -1.535771 | 0.738801  |
| H  | 4.146136  | -5.471500 | 2.007798  | H | -7.402255  | -1.919332 | 1.705302  |
| H  | 3.010274  | -5.754004 | -0.100727 | C | -5.770417  | -1.135232 | 0.521484  |
| H  | 5.358788  | -4.055403 | 3.642910  | H | -5.037204  | -1.204869 | 1.321398  |
| H  | 1.177938  | -2.718012 | 0.516070  | O | -9.285590  | -1.863999 | 0.016322  |
| Si | 0.192089  | -3.458493 | 1.310315  | C | -10.250662 | -1.775235 | -1.005351 |
| O  | -1.267693 | -2.791050 | 0.853495  | H | -10.384668 | -0.739141 | -1.350260 |
| O  | 0.001533  | -5.054178 | 0.967848  | H | -9.988927  | -2.403315 | -1.870232 |
| O  | 0.568091  | -3.350018 | 2.905736  | H | -11.186179 | -2.134103 | -0.571061 |



|    |           |           |           |
|----|-----------|-----------|-----------|
| C  | -3.900433 | 1.319154  | -1.210264 |
| C  | -3.617544 | 2.197930  | -0.154660 |
| C  | -4.228306 | 1.887005  | -2.442954 |
| C  | -3.655194 | 3.573546  | -0.327579 |
| H  | -3.343518 | 1.778402  | 0.812981  |
| C  | -4.258199 | 3.267367  | -2.638865 |
| H  | -4.453467 | 1.252833  | -3.300334 |
| C  | -3.972876 | 4.122011  | -1.573298 |
| H  | -3.447623 | 4.253051  | 0.498148  |
| H  | -4.505300 | 3.660279  | -3.621975 |
| O  | -3.977722 | 5.483624  | -1.647686 |
| C  | -4.293696 | 6.051544  | -2.897647 |
| H  | -5.305495 | 5.772330  | -3.227010 |
| H  | -4.245034 | 7.133660  | -2.759916 |
| H  | -3.574134 | 5.751681  | -3.673876 |
| Zn | -1.283891 | -0.731505 | -0.014500 |
| Zn | 1.668002  | -0.338260 | 0.840717  |
| C  | 1.778784  | 1.919274  | 2.404145  |
| O  | 2.322420  | 0.868023  | 2.743921  |
| O  | 2.450693  | 3.022798  | 2.118840  |
| C  | 3.903701  | 2.894500  | 2.129966  |
| H  | 4.167887  | 2.181551  | 1.338425  |
| H  | 4.197933  | 2.462464  | 3.093051  |
| C  | 4.470756  | 4.266808  | 1.909557  |
| H  | 4.113928  | 4.688352  | 0.964810  |
| H  | 5.563215  | 4.209759  | 1.855052  |
| H  | 4.197216  | 4.948713  | 2.721932  |
| C  | 0.272054  | 2.069140  | 2.222142  |
| C  | -0.386560 | 0.694414  | 2.562274  |
| O  | -0.075105 | -0.330289 | 1.661157  |
| O  | -1.758582 | 0.920282  | 2.578932  |
| C  | -2.506465 | -0.105675 | 3.220955  |
| H  | -2.030524 | -0.332943 | 4.192616  |
| H  | -2.484712 | -1.023903 | 2.613656  |
| C  | -3.912339 | 0.401970  | 3.394280  |
| H  | -3.920517 | 1.322662  | 3.989192  |
| H  | -4.537566 | -0.344930 | 3.897275  |
| H  | -4.353367 | 0.614493  | 2.414492  |
| C  | -0.008591 | 2.446457  | 0.761162  |
| H  | -1.076707 | 2.333123  | 0.537450  |
| H  | 0.543496  | 1.807207  | 0.058616  |
| H  | 0.287335  | 3.481321  | 0.563205  |
| C  | -0.253653 | 3.099340  | 3.212282  |
| C  | -1.297677 | 3.963484  | 2.878682  |

|   |           |          |          |
|---|-----------|----------|----------|
| C | 0.257411  | 3.139667 | 4.513005 |
| C | -1.813753 | 4.849889 | 3.817855 |
| H | -1.719470 | 3.936824 | 1.875808 |
| C | -0.254515 | 4.028090 | 5.454374 |
| H | 1.070759  | 2.467543 | 4.794973 |
| C | -1.293392 | 4.887456 | 5.109084 |
| H | -2.630715 | 5.513262 | 3.537369 |
| H | 0.161881  | 4.048193 | 6.460301 |
| H | -1.695658 | 5.583919 | 5.842487 |
| H | -0.046926 | 0.391581 | 3.574999 |

### IM9b

M06L SCF energy in Solvent: -7322.586303 a.u.

PBE0-D3BJ Free energy in Solvent: -7321.457732 a.u.

|   |           |           |           |
|---|-----------|-----------|-----------|
| O | -0.762116 | -0.883615 | -0.676370 |
| C | -1.382876 | -1.998587 | -1.091146 |
| C | -2.797398 | -2.100037 | -1.081514 |
| C | -3.365987 | -3.254575 | -1.619433 |
| H | -4.453132 | -3.334619 | -1.645269 |
| C | -2.609430 | -4.316540 | -2.125346 |
| C | -1.222016 | -4.209949 | -2.062061 |
| H | -0.600329 | -5.036218 | -2.415962 |
| C | -0.600026 | -3.076637 | -1.541842 |
| C | -3.277713 | -5.530188 | -2.698471 |
| H | -3.878276 | -5.288606 | -3.585942 |
| H | -3.961475 | -5.998191 | -1.978339 |
| H | -2.544852 | -6.288481 | -2.997497 |
| C | -3.672176 | -0.952012 | -0.516466 |
| O | -3.214946 | -0.558328 | 0.770964  |
| C | -5.125712 | -1.418606 | -0.298914 |
| C | -5.424204 | -2.383934 | 0.721585  |
| C | -6.162601 | -0.907204 | -1.052282 |
| C | -4.432783 | -3.027171 | 1.509748  |
| C | -6.792384 | -2.753082 | 0.946376  |
| C | -7.505422 | -1.275123 | -0.827728 |
| H | -5.947874 | -0.190696 | -1.842296 |
| C | -4.770694 | -3.955897 | 2.466346  |
| H | -3.391143 | -2.771492 | 1.348588  |
| C | -7.104832 | -3.705048 | 1.947870  |
| C | -7.816277 | -2.173015 | 0.159161  |
| H | -8.289232 | -0.835098 | -1.442389 |
| C | -6.118544 | -4.296472 | 2.698159  |
| H | -3.984645 | -4.433020 | 3.050515  |
| H | -8.152742 | -3.963216 | 2.104613  |

|    |           |           |           |    |           |           |           |
|----|-----------|-----------|-----------|----|-----------|-----------|-----------|
| H  | -8.850072 | -2.462578 | 0.349660  | C  | 2.339886  | -0.897714 | -4.006789 |
| H  | -6.372886 | -5.029359 | 3.462521  | H  | 1.978976  | 0.136919  | -4.032530 |
| C  | -3.626908 | 0.249487  | -1.493875 | H  | 2.595114  | -1.176646 | -5.034642 |
| C  | -3.958015 | 1.581982  | -1.061844 | C  | 3.524683  | -1.039105 | -3.038398 |
| C  | -3.282105 | 0.055745  | -2.820046 | H  | 3.819526  | -0.069814 | -2.619993 |
| C  | -4.466316 | 1.896386  | 0.232871  | H  | 4.417625  | -1.452792 | -3.518329 |
| C  | -3.827407 | 2.666531  | -1.998210 | C  | 3.051987  | -1.953459 | -1.900235 |
| C  | -3.197485 | 1.116133  | -3.741507 | H  | 3.370898  | -2.994744 | -2.093980 |
| H  | -3.052637 | -0.952708 | -3.159400 | C  | 3.563500  | -1.473840 | -0.493132 |
| C  | -4.754612 | 3.193344  | 0.593012  | C  | 5.073530  | -1.201876 | -0.603596 |
| H  | -4.626098 | 1.086822  | 0.936800  | C  | 5.959054  | -2.124645 | -1.159837 |
| C  | -4.120728 | 3.990094  | -1.582949 | H  | 5.587688  | -3.079053 | -1.535902 |
| C  | -3.444753 | 2.402760  | -3.334230 | C  | 7.323799  | -1.862540 | -1.263175 |
| H  | -2.900556 | 0.912944  | -4.768886 | H  | 7.979649  | -2.605664 | -1.709631 |
| C  | -4.561693 | 4.257756  | -0.310633 | C  | 7.828116  | -0.649416 | -0.789816 |
| H  | -5.145362 | 3.395636  | 1.589378  | C  | 6.955361  | 0.281295  | -0.219684 |
| H  | -4.006388 | 4.793631  | -2.312106 | H  | 7.365574  | 1.219763  | 0.147943  |
| H  | -3.348464 | 3.237484  | -4.029525 | C  | 5.598967  | 0.004957  | -0.131235 |
| H  | -4.787841 | 5.279614  | -0.009465 | H  | 4.913687  | 0.726951  | 0.308295  |
| H  | -1.128228 | 1.492929  | -1.922058 | O  | 9.142927  | -0.285230 | -0.841964 |
| Si | -0.066076 | 2.397490  | -2.331743 | C  | 10.038747 | -1.214307 | -1.404190 |
| O  | 1.367954  | 1.574456  | -2.083266 | H  | 10.055234 | -2.158362 | -0.839206 |
| O  | -0.288509 | 2.702655  | -3.942661 | H  | 9.791762  | -1.436319 | -2.453349 |
| O  | 0.082824  | 3.828601  | -1.519218 | H  | 11.026231 | -0.750217 | -1.357488 |
| C  | 2.642644  | 2.239260  | -2.032207 | C  | 3.364059  | -2.547437 | 0.594831  |
| H  | 2.524668  | 3.266238  | -1.675374 | C  | 2.935030  | -2.143577 | 1.864511  |
| H  | 3.270041  | 1.682252  | -1.330665 | C  | 3.622591  | -3.906491 | 0.410456  |
| H  | 3.091842  | 2.228996  | -3.033780 | C  | 2.742563  | -3.051954 | 2.893508  |
| C  | -0.723315 | 4.955822  | -1.800498 | H  | 2.761225  | -1.080543 | 2.023192  |
| H  | -0.075685 | 5.809137  | -2.046022 | C  | 3.425925  | -4.839255 | 1.427820  |
| H  | -1.402521 | 4.784684  | -2.648148 | H  | 3.971220  | -4.275292 | -0.554346 |
| H  | -1.321216 | 5.210757  | -0.915773 | C  | 2.978788  | -4.413214 | 2.680112  |
| C  | 0.663406  | 3.423864  | -4.696388 | H  | 2.415095  | -2.729696 | 3.880940  |
| H  | 1.091432  | 4.269023  | -4.134327 | H  | 3.624404  | -5.890318 | 1.233642  |
| H  | 1.487365  | 2.770834  | -5.018205 | O  | 2.751813  | -5.235670 | 3.743670  |
| H  | 0.168372  | 3.821154  | -5.588884 | C  | 2.990365  | -6.610475 | 3.548583  |
| O  | 2.921226  | -0.298223 | -0.133781 | H  | 4.039018  | -6.807133 | 3.280854  |
| N  | 1.572537  | -1.895798 | -2.001183 | H  | 2.764632  | -7.095226 | 4.500786  |
| C  | 0.887158  | -3.035537 | -1.355150 | H  | 2.340789  | -7.028326 | 2.765241  |
| H  | 1.121111  | -2.984431 | -0.282695 | Zn | 1.122734  | -0.141199 | -0.715598 |
| H  | 1.336161  | -3.976510 | -1.727483 | Zn | -1.596694 | 0.322163  | 0.683731  |
| C  | 1.266418  | -1.812952 | -3.437391 | C  | 1.227422  | 3.856381  | 1.300058  |
| H  | 1.318691  | -2.824860 | -3.883036 | O  | 2.285309  | 3.409344  | 0.904440  |
| H  | 0.240059  | -1.447954 | -3.578008 | O  | 0.851599  | 5.137122  | 1.136810  |

|   |           |           |           |   |           |           |           |
|---|-----------|-----------|-----------|---|-----------|-----------|-----------|
| C | 1.785429  | 5.954094  | 0.406275  | C | -1.454724 | -4.078482 | -2.274636 |
| H | 1.876675  | 5.539574  | -0.606500 | H | -0.906688 | -4.923947 | -2.698128 |
| H | 2.770502  | 5.873555  | 0.881169  | C | -0.735515 | -3.072314 | -1.631900 |
| C | 1.254307  | 7.361433  | 0.412259  | C | -3.614094 | -5.110907 | -3.079354 |
| H | 0.259994  | 7.412070  | -0.045634 | H | -4.017314 | -4.753379 | -4.037106 |
| H | 1.922948  | 8.021669  | -0.150494 | H | -4.471290 | -5.458263 | -2.489514 |
| H | 1.174132  | 7.747517  | 1.433812  | H | -2.986574 | -5.982324 | -3.299491 |
| C | 0.201614  | 3.063764  | 2.105101  | C | -3.615167 | -0.822653 | -0.359343 |
| C | 0.425824  | 1.576518  | 1.739497  | O | -3.093189 | -0.609785 | 0.933632  |
| O | 0.103460  | 1.321794  | 0.434023  | C | -5.089652 | -1.235140 | -0.132527 |
| O | -0.510705 | 0.784362  | 2.531966  | C | -5.407310 | -2.304006 | 0.774374  |
| C | 0.004830  | -0.219370 | 3.426211  | C | -6.125903 | -0.579190 | -0.767148 |
| H | -0.101701 | 0.156922  | 4.453706  | C | -4.428482 | -3.085784 | 1.444285  |
| H | 1.078188  | -0.349429 | 3.227361  | C | -6.785425 | -2.633860 | 1.002868  |
| C | -0.751645 | -1.506095 | 3.210648  | C | -7.478244 | -0.905603 | -0.534982 |
| H | -1.830870 | -1.356971 | 3.333121  | H | -5.906298 | 0.220204  | -1.470806 |
| H | -0.427238 | -2.269973 | 3.926277  | C | -4.785349 | -4.111633 | 2.288543  |
| H | -0.575225 | -1.900633 | 2.199239  | H | -3.380302 | -2.853845 | 1.291053  |
| C | -1.222250 | 3.467047  | 1.732225  | C | -7.116738 | -3.690429 | 1.886193  |
| H | -1.955517 | 2.842435  | 2.256515  | C | -7.803536 | -1.909315 | 0.337937  |
| H | -1.375780 | 3.339830  | 0.654282  | H | -8.257395 | -0.350418 | -1.054939 |
| H | -1.421981 | 4.514100  | 1.980037  | C | -6.140744 | -4.418428 | 2.520778  |
| C | 0.530389  | 3.231902  | 3.585951  | H | -4.007898 | -4.690589 | 2.784936  |
| C | -0.447782 | 3.515188  | 4.542128  | H | -8.171693 | -3.915899 | 2.046382  |
| C | 1.844689  | 3.014300  | 4.020735  | H | -8.844084 | -2.172052 | 0.530580  |
| C | -0.122000 | 3.577756  | 5.895213  | H | -6.409842 | -5.230689 | 3.194590  |
| H | -1.478017 | 3.682822  | 4.235398  | C | -3.559181 | 0.463338  | -1.221657 |
| C | 2.170264  | 3.077864  | 5.371289  | C | -3.733655 | 1.770531  | -0.652421 |
| H | 2.621406  | 2.798100  | 3.287208  | C | -3.411062 | 0.359525  | -2.594005 |
| C | 1.186169  | 3.358381  | 6.315840  | C | -4.089448 | 2.004671  | 0.707696  |
| H | -0.900194 | 3.797181  | 6.624641  | C | -3.621676 | 2.921146  | -1.509483 |
| H | 3.198451  | 2.906089  | 5.685792  | C | -3.365251 | 1.485076  | -3.436982 |
| H | 1.437943  | 3.406317  | 7.373799  | H | -3.314787 | -0.629582 | -3.037688 |
| H | 1.452752  | 1.263667  | 1.991069  | C | -4.248505 | 3.280969  | 1.197745  |

### TS7b

M06L SCF energy in Solvent: -7322.560260 a.u.

PBE0-D3BJ Free energy in Solvent: -7321.434209 a.u.

|   |           |           |           |   |           |          |           |
|---|-----------|-----------|-----------|---|-----------|----------|-----------|
| O | -0.684790 | -0.950788 | -0.557980 | C | -4.064657 | 4.404925 | 0.367435  |
| C | -1.414002 | -1.964398 | -1.083847 | H | -4.527570 | 3.420494 | 2.241940  |
| C | -2.830554 | -1.945627 | -1.080069 | H | -3.672753 | 5.075424 | -1.632741 |
| C | -3.498264 | -2.979088 | -1.739534 | H | -3.372334 | 3.629649 | -3.539783 |
| H | -4.588104 | -2.955784 | -1.764501 | H | -4.185323 | 5.409347 | 0.771083  |
| C | -2.843252 | -4.043518 | -2.362956 | H | -1.047478 | 1.370595 | -2.021201 |

|    |           |           |           |    |           |           |           |
|----|-----------|-----------|-----------|----|-----------|-----------|-----------|
| Si | -0.006099 | 2.158650  | -2.653679 | C  | 9.977017  | -2.478074 | -0.266090 |
| O  | 1.399814  | 1.256309  | -2.504198 | H  | 9.732108  | -3.405898 | 0.272481  |
| O  | -0.403979 | 2.341275  | -4.249021 | H  | 9.900175  | -2.668139 | -1.347271 |
| O  | 0.346381  | 3.633839  | -1.993914 | H  | 10.999813 | -2.180698 | -0.025059 |
| C  | 2.717021  | 1.846868  | -2.508937 | C  | 2.931510  | -2.513730 | 0.776081  |
| H  | 2.683153  | 2.864709  | -2.110074 | C  | 2.067906  | -1.906755 | 1.695714  |
| H  | 3.349604  | 1.224384  | -1.867890 | C  | 3.221643  | -3.865783 | 0.964920  |
| H  | 3.102144  | 1.852893  | -3.536777 | C  | 1.487754  | -2.626092 | 2.730787  |
| C  | -0.412218 | 4.796485  | -2.266154 | H  | 1.838614  | -0.846757 | 1.594818  |
| H  | 0.276101  | 5.617111  | -2.507719 | C  | 2.654607  | -4.605534 | 2.000011  |
| H  | -1.096039 | 4.657940  | -3.115964 | H  | 3.906356  | -4.373426 | 0.284955  |
| H  | -0.998227 | 5.077284  | -1.379886 | C  | 1.772271  | -3.984839 | 2.888851  |
| C  | 0.558697  | 2.758494  | -5.195027 | H  | 0.811535  | -2.147637 | 3.437039  |
| H  | 1.096184  | 3.664198  | -4.871850 | H  | 2.905930  | -5.658099 | 2.104368  |
| H  | 1.297321  | 1.965873  | -5.383952 | O  | 1.154863  | -4.609666 | 3.930728  |
| H  | 0.042074  | 2.981803  | -6.133869 | C  | 1.439171  | -5.977065 | 4.116289  |
| O  | 2.996187  | -0.414358 | -0.404329 | H  | 2.508943  | -6.147324 | 4.309027  |
| N  | 1.592272  | -2.216901 | -2.042236 | H  | 0.861361  | -6.290127 | 4.988155  |
| C  | 0.736037  | -3.242397 | -1.402905 | H  | 1.136863  | -6.577997 | 3.245804  |
| H  | 0.937962  | -3.215663 | -0.327128 | Zn | 1.185911  | -0.356587 | -1.001082 |
| H  | 1.057109  | -4.236487 | -1.766410 | Zn | -1.352131 | 0.009138  | 1.071101  |
| C  | 1.442603  | -2.240692 | -3.508933 | C  | 1.657774  | 4.075167  | 0.692191  |
| H  | 1.467904  | -3.290876 | -3.857483 | O  | 2.733222  | 3.654874  | 0.312826  |
| H  | 0.467800  | -1.824852 | -3.793598 | O  | 1.222664  | 5.325114  | 0.477720  |
| C  | 2.638075  | -1.460740 | -4.017470 | C  | 2.132561  | 6.157359  | -0.271487 |
| H  | 2.400885  | -0.391097 | -4.034349 | H  | 2.300612  | 5.685184  | -1.248318 |
| H  | 2.908771  | -1.750201 | -5.038429 | H  | 3.097166  | 6.175075  | 0.249341  |
| C  | 3.742307  | -1.759686 | -2.994063 | C  | 1.507981  | 7.520925  | -0.380399 |
| H  | 4.271484  | -0.849067 | -2.689611 | H  | 0.535020  | 7.472798  | -0.882471 |
| H  | 4.499425  | -2.440795 | -3.398022 | H  | 2.156762  | 8.189019  | -0.956599 |
| C  | 3.052041  | -2.396651 | -1.775217 | H  | 1.354925  | 7.963606  | 0.609206  |
| H  | 3.252851  | -3.482663 | -1.736068 | C  | 0.672106  | 3.255104  | 1.532899  |
| C  | 3.477749  | -1.711611 | -0.422495 | C  | 1.001069  | 1.815441  | 1.136447  |
| C  | 5.008640  | -1.682994 | -0.334865 | O  | 0.497803  | 1.345371  | 0.096415  |
| C  | 5.824725  | -2.731215 | -0.759751 | O  | -0.217114 | 0.717843  | 2.395562  |
| H  | 5.387548  | -3.615502 | -1.225898 | C  | -0.529284 | 0.638971  | 3.770731  |
| C  | 7.212711  | -2.684543 | -0.626089 | H  | 0.186109  | 1.270119  | 4.319618  |
| H  | 7.811488  | -3.521746 | -0.975841 | H  | -0.373367 | -0.394144 | 4.130344  |
| C  | 7.809842  | -1.562755 | -0.050172 | C  | -1.950659 | 1.072531  | 4.062832  |
| C  | 7.007175  | -0.498415 | 0.371725  | H  | -2.112762 | 2.111989  | 3.748058  |
| H  | 7.490084  | 0.372539  | 0.810558  | H  | -2.179959 | 1.002031  | 5.133767  |
| C  | 5.630745  | -0.562292 | 0.228068  | H  | -2.672423 | 0.442812  | 3.522361  |
| H  | 5.003185  | 0.268018  | 0.544756  | C  | -0.772640 | 3.580150  | 1.183468  |
| O  | 9.153265  | -1.409473 | 0.136045  | H  | -1.448443 | 2.954889  | 1.776360  |

|   |           |          |          |
|---|-----------|----------|----------|
| H | -0.968858 | 3.377142 | 0.126085 |
| H | -1.001032 | 4.632301 | 1.375750 |
| C | 1.027944  | 3.498414 | 2.995913 |
| C | 0.098205  | 4.001937 | 3.908773 |
| C | 2.316925  | 3.194199 | 3.451629 |
| C | 0.438021  | 4.169065 | 5.248999 |
| H | -0.907648 | 4.254310 | 3.579833 |
| C | 2.655720  | 3.360501 | 4.790259 |
| H | 3.066354  | 2.832573 | 2.748082 |
| C | 1.715059  | 3.844197 | 5.696117 |
| H | -0.303822 | 4.554876 | 5.946302 |
| H | 3.661186  | 3.111391 | 5.125148 |
| H | 1.978542  | 3.972926 | 6.744483 |
| H | 1.899736  | 1.357051 | 1.575485 |

**TS5e**

M06L SCF energy in Solvent: -7322.541862 a.u.

PBE0-D3BJ Free energy in Solvent: -7321.413814 a.u.

|   |          |           |           |
|---|----------|-----------|-----------|
| O | 1.062949 | 0.266104  | -0.552367 |
| C | 1.601194 | 1.334111  | -1.198534 |
| C | 3.003109 | 1.577153  | -1.188459 |
| C | 3.503202 | 2.605241  | -1.985089 |
| H | 4.581224 | 2.762668  | -2.006463 |
| C | 2.695123 | 3.451147  | -2.747470 |
| C | 1.323934 | 3.245990  | -2.675037 |
| H | 0.649210 | 3.905095  | -3.226858 |
| C | 0.767101 | 2.218951  | -1.910507 |
| C | 3.290799 | 4.546956  | -3.577836 |
| H | 4.002217 | 4.159626  | -4.319324 |
| H | 3.845042 | 5.267621  | -2.961793 |
| H | 2.519397 | 5.103906  | -4.122165 |
| C | 3.940602 | 0.749602  | -0.278726 |
| O | 3.454370 | 0.811940  | 1.042770  |
| C | 5.367603 | 1.348405  | -0.225596 |
| C | 5.599849 | 2.614974  | 0.413974  |
| C | 6.446809 | 0.677754  | -0.767079 |
| C | 4.566437 | 3.422769  | 0.960316  |
| C | 6.939236 | 3.127542  | 0.473319  |
| C | 7.761678 | 1.181840  | -0.696018 |
| H | 6.292159 | -0.275391 | -1.266987 |
| C | 4.838824 | 4.644986  | 1.530524  |
| H | 3.547894 | 3.052305  | 0.932638  |
| C | 7.183923 | 4.384959  | 1.077899  |
| C | 8.005882 | 2.382340  | -0.083789 |

|    |           |           |           |
|----|-----------|-----------|-----------|
| H  | 8.576987  | 0.607362  | -1.133236 |
| C  | 6.158201  | 5.134936  | 1.597536  |
| H  | 4.021806  | 5.239759  | 1.937149  |
| H  | 8.211913  | 4.747308  | 1.113625  |
| H  | 9.016239  | 2.787675  | -0.021375 |
| H  | 6.359559  | 6.102577  | 2.055095  |
| C  | 4.014121  | -0.700754 | -0.823987 |
| C  | 4.332251  | -1.829434 | 0.006565  |
| C  | 3.847507  | -0.911072 | -2.181081 |
| C  | 4.661734  | -1.733726 | 1.389567  |
| C  | 4.376274  | -3.138671 | -0.590014 |
| C  | 3.961066  | -2.183656 | -2.769556 |
| H  | 3.628744  | -0.057381 | -2.820462 |
| C  | 4.926109  | -2.854698 | 2.143844  |
| H  | 4.705038  | -0.748332 | 1.840915  |
| C  | 4.642860  | -4.269847 | 0.222242  |
| C  | 4.196327  | -3.284426 | -1.985495 |
| H  | 3.825058  | -2.289488 | -3.843553 |
| C  | 4.898205  | -4.139601 | 1.565705  |
| H  | 5.174169  | -2.742667 | 3.198336  |
| H  | 4.667618  | -5.251470 | -0.255031 |
| H  | 4.270464  | -4.281365 | -2.422940 |
| H  | 5.105484  | -5.018913 | 2.174320  |
| H  | 1.578304  | -2.310029 | -1.035643 |
| Si | 0.606612  | -2.969117 | -1.901004 |
| O  | -0.925818 | -2.332378 | -1.681320 |
| O  | 1.057328  | -2.680261 | -3.458027 |
| O  | 0.402629  | -4.582538 | -1.599765 |
| C  | -2.014217 | -3.121059 | -1.174812 |
| H  | -1.684572 | -3.772923 | -0.360981 |
| H  | -2.766953 | -2.422204 | -0.795387 |
| H  | -2.434114 | -3.724562 | -1.988798 |
| C  | 1.498896  | -5.456397 | -1.427028 |
| H  | 2.022488  | -5.637291 | -2.377516 |
| H  | 2.226086  | -5.058593 | -0.702505 |
| H  | 1.114995  | -6.411555 | -1.052481 |
| C  | 0.501868  | -3.389906 | -4.546195 |
| H  | 1.106746  | -4.278960 | -4.772687 |
| H  | -0.532294 | -3.716703 | -4.358820 |
| H  | 0.501588  | -2.733178 | -5.423145 |
| O  | -2.689392 | 0.033924  | -0.122123 |
| N  | -1.269866 | 0.838884  | -2.308099 |
| C  | -0.725272 | 2.124246  | -1.834942 |
| H  | -1.079661 | 2.260764  | -0.799145 |

|    |            |           |           |                                                     |           |           |           |
|----|------------|-----------|-----------|-----------------------------------------------------|-----------|-----------|-----------|
| H  | -1.169505  | 2.946156  | -2.426566 | Zn                                                  | 1.870581  | -0.138576 | 1.261943  |
| C  | -0.760687  | 0.447772  | -3.634815 | C                                                   | -0.695703 | 0.384271  | 2.886538  |
| H  | -0.701656  | 1.342575  | -4.280935 | O                                                   | 0.045915  | 0.903455  | 2.052290  |
| H  | 0.257215   | 0.047759  | -3.540071 | O                                                   | -1.527179 | 1.096502  | 3.624970  |
| C  | -1.777471  | -0.560893 | -4.168876 | C                                                   | -1.497916 | 2.536107  | 3.415858  |
| H  | -1.380315  | -1.578495 | -4.124483 | H                                                   | -1.800763 | 2.729965  | 2.381066  |
| H  | -2.015142  | -0.350048 | -5.217711 | H                                                   | -0.463292 | 2.876302  | 3.536119  |
| C  | -3.002795  | -0.420214 | -3.259086 | C                                                   | -2.437530 | 3.138303  | 4.420578  |
| H  | -3.104237  | -1.286239 | -2.594563 | H                                                   | -3.429319 | 2.680605  | 4.343248  |
| H  | -3.944255  | -0.339461 | -3.811159 | H                                                   | -2.543091 | 4.212627  | 4.235346  |
| C  | -2.744785  | 0.825836  | -2.416560 | H                                                   | -2.075862 | 2.995160  | 5.444295  |
| H  | -3.059665  | 1.715122  | -2.993032 | C                                                   | -0.666900 | -1.083577 | 3.301794  |
| C  | -3.432468  | 0.803793  | -1.007726 | C                                                   | -0.091348 | -1.934282 | 2.144098  |
| C  | -4.832960  | 0.184676  | -1.184250 | O                                                   | -0.525869 | -1.835304 | 0.963257  |
| C  | -5.791052  | 0.771933  | -2.010096 | O                                                   | 0.271560  | -3.150943 | 2.628638  |
| H  | -5.554929  | 1.702000  | -2.531450 | C                                                   | 0.923730  | -4.004750 | 1.683649  |
| C  | -7.053021  | 0.208201  | -2.184596 | H                                                   | 1.735912  | -3.423044 | 1.206617  |
| H  | -7.771240  | 0.694100  | -2.840446 | H                                                   | 0.213575  | -4.295111 | 0.898315  |
| C  | -7.382506  | -0.966701 | -1.502963 | C                                                   | 1.463467  | -5.189524 | 2.438048  |
| C  | -6.438472  | -1.558422 | -0.659941 | H                                                   | 2.168015  | -4.866124 | 3.212124  |
| H  | -6.711764  | -2.469309 | -0.129683 | H                                                   | 1.996788  | -5.861291 | 1.755877  |
| C  | -5.182049  | -0.987092 | -0.510606 | H                                                   | 0.656596  | -5.753686 | 2.918262  |
| H  | -4.445240  | -1.442748 | 0.147745  | C                                                   | 0.258714  | -1.121575 | 4.526712  |
| O  | -8.588538  | -1.598987 | -1.590360 | H                                                   | -0.201599 | -0.593768 | 5.367881  |
| C  | -9.556267  | -1.012397 | -2.428716 | H                                                   | 1.220076  | -0.649764 | 4.295402  |
| H  | -9.816069  | 0.005355  | -2.101582 | H                                                   | 0.463518  | -2.154501 | 4.815985  |
| H  | -9.218317  | -0.970814 | -3.474959 | C                                                   | -2.067490 | -1.617452 | 3.605693  |
| H  | -10.441138 | -1.648805 | -2.362274 | C                                                   | -2.322408 | -2.397328 | 4.735084  |
| C  | -3.680509  | 2.206166  | -0.412818 | C                                                   | -3.118555 | -1.348630 | 2.720150  |
| C  | -4.009671  | 2.272361  | 0.950446  | C                                                   | -3.603043 | -2.883880 | 4.987879  |
| C  | -3.730503  | 3.398441  | -1.133257 | H                                                   | -1.523071 | -2.629150 | 5.435597  |
| C  | -4.358739  | 3.466138  | 1.557528  | C                                                   | -4.398893 | -1.824908 | 2.982923  |
| H  | -3.998507  | 1.351736  | 1.535682  | H                                                   | -2.943330 | -0.759388 | 1.816605  |
| C  | -4.054699  | 4.618554  | -0.534265 | C                                                   | -4.648058 | -2.593678 | 4.117411  |
| H  | -3.506690  | 3.411820  | -2.198818 | H                                                   | -3.781487 | -3.486769 | 5.876914  |
| C  | -4.371458  | 4.656481  | 0.821460  | H                                                   | -5.209534 | -1.582154 | 2.295726  |
| H  | -4.636927  | 3.507572  | 2.608508  | H                                                   | -5.651595 | -2.963519 | 4.321599  |
| H  | -4.060382  | 5.521918  | -1.138654 | H                                                   | 1.394302  | -1.377446 | 2.162582  |
| O  | -4.705964  | 5.781907  | 1.515043  |                                                     |           |           |           |
| C  | -4.747079  | 6.988597  | 0.787925  |                                                     |           |           |           |
| H  | -5.490007  | 6.949391  | -0.022211 |                                                     |           |           |           |
| H  | -5.033257  | 7.763294  | 1.502258  |                                                     |           |           |           |
| H  | -3.766289  | 7.237155  | 0.356434  |                                                     |           |           |           |
| Zn | -0.863329  | -0.376905 | -0.534487 |                                                     |           |           |           |
|    |            |           |           | <b>TS5f</b>                                         |           |           |           |
|    |            |           |           | M06L SCF energy in Solvent: -7322.537626 a.u.       |           |           |           |
|    |            |           |           | PBE0-D3BJ Free energy in Solvent: -7321.408802 a.u. |           |           |           |
|    |            |           |           | O                                                   | 0.856913  | -0.086836 | -0.813122 |
|    |            |           |           | C                                                   | 1.287447  | 0.734631  | -1.802252 |

|   |          |           |           |    |           |           |           |
|---|----------|-----------|-----------|----|-----------|-----------|-----------|
| C | 2.676308 | 0.977197  | -1.995288 | H  | 4.698427  | -5.074957 | 1.147598  |
| C | 3.077335 | 1.701830  | -3.114549 | H  | 4.068747  | -4.951993 | -1.170211 |
| H | 4.144006 | 1.848519  | -3.282162 | H  | 5.294461  | -3.984319 | 3.293865  |
| C | 2.178468 | 2.265092  | -4.023987 | H  | 1.414678  | -2.672799 | -0.333300 |
| C | 0.825411 | 2.093370  | -3.763167 | Si | 0.402173  | -3.623423 | -0.788915 |
| H | 0.086758 | 2.546407  | -4.429169 | O  | -1.101585 | -2.893897 | -0.736022 |
| C | 0.365952 | 1.355966  | -2.669213 | O  | 0.610744  | -4.056973 | -2.367147 |
| C | 2.664870 | 3.043435  | -5.208475 | O  | 0.291971  | -4.950547 | 0.188696  |
| H | 3.291159 | 2.432374  | -5.872136 | C  | -2.163153 | -3.473030 | 0.038673  |
| H | 3.278121 | 3.902835  | -4.906262 | H  | -1.794956 | -3.809624 | 1.012814  |
| H | 1.831048 | 3.427810  | -5.807358 | H  | -2.915121 | -2.691365 | 0.181653  |
| C | 3.692840 | 0.505671  | -0.933503 | H  | -2.595032 | -4.321192 | -0.506240 |
| O | 3.309483 | 1.046619  | 0.312589  | C  | 1.409073  | -5.554629 | 0.805119  |
| C | 5.117021 | 1.051681  | -1.208470 | H  | 1.929325  | -6.231065 | 0.110035  |
| C | 5.406268 | 2.452889  | -1.058429 | H  | 2.132384  | -4.809939 | 1.169647  |
| C | 6.145188 | 0.206665  | -1.579603 | H  | 1.052426  | -6.144143 | 1.657469  |
| C | 4.425334 | 3.433548  | -0.748624 | C  | 1.018148  | -5.337609 | -2.789591 |
| C | 6.749858 | 2.909977  | -1.273880 | H  | 2.087890  | -5.506849 | -2.589208 |
| C | 7.462852 | 0.662003  | -1.786463 | H  | 0.443417  | -6.134830 | -2.298217 |
| H | 5.948353 | -0.853474 | -1.716092 | H  | 0.857281  | -5.405420 | -3.870598 |
| C | 4.752438 | 4.766166  | -0.644639 | O  | -2.889484 | -0.279348 | 0.056365  |
| H | 3.403624 | 3.110692  | -0.583249 | N  | -1.643883 | -0.090851 | -2.392752 |
| C | 7.052392 | 4.288025  | -1.145431 | C  | -1.114007 | 1.283735  | -2.438583 |
| C | 7.763787 | 1.988300  | -1.628298 | H  | -1.399167 | 1.774805  | -1.493073 |
| H | 8.235062 | -0.052209 | -2.068577 | H  | -1.623459 | 1.838198  | -3.248867 |
| C | 6.077735 | 5.203794  | -0.836597 | C  | -1.183951 | -0.901291 | -3.538319 |
| H | 3.974280 | 5.491698  | -0.410670 | H  | -1.179269 | -0.273407 | -4.447360 |
| H | 8.082942 | 4.605672  | -1.308006 | H  | -0.149748 | -1.227575 | -3.365799 |
| H | 8.777858 | 2.359067  | -1.780466 | C  | -2.180588 | -2.051085 | -3.652317 |
| H | 6.323509 | 6.261043  | -0.746694 | H  | -1.736405 | -2.990056 | -3.306913 |
| C | 3.744786 | -1.042749 | -0.922266 | H  | -2.477840 | -2.197352 | -4.696892 |
| C | 4.177768 | -1.794699 | 0.223365  | C  | -3.363739 | -1.641092 | -2.770663 |
| C | 3.468923 | -1.726449 | -2.092649 | H  | -3.404394 | -2.252313 | -1.862078 |
| C | 4.591513 | -1.205495 | 1.453450  | H  | -4.332383 | -1.761813 | -3.264691 |
| C | 4.252301 | -3.228360 | 0.123588  | C  | -3.123186 | -0.183056 | -2.368623 |
| C | 3.594353 | -3.123245 | -2.199645 | H  | -3.531913 | 0.489298  | -3.147078 |
| H | 3.163210 | -1.159266 | -2.970383 | C  | -3.730308 | 0.163945  | -0.955866 |
| C | 4.974794 | -1.978383 | 2.526423  | C  | -5.094201 | -0.550300 | -0.861546 |
| H | 4.598338 | -0.123186 | 1.526926  | C  | -6.099627 | -0.314856 | -1.799146 |
| C | 4.651287 | -3.989370 | 1.251105  | H  | -5.925154 | 0.399199  | -2.607106 |
| C | 3.963939 | -3.866962 | -1.106089 | C  | -7.329943 | -0.964005 | -1.734581 |
| H | 3.382316 | -3.605813 | -3.152588 | H  | -8.085005 | -0.759942 | -2.489704 |
| C | 4.991672 | -3.384626 | 2.436506  | C  | -7.579106 | -1.863054 | -0.693471 |
| H | 5.279917 | -1.492962 | 3.452278  | C  | -6.593524 | -2.086487 | 0.270453  |

|    |            |           |           |
|----|------------|-----------|-----------|
| H  | -6.810301  | -2.776292 | 1.083827  |
| C  | -5.370038  | -1.436370 | 0.181458  |
| H  | -4.603917  | -1.600378 | 0.937053  |
| O  | -8.744344  | -2.554655 | -0.531262 |
| C  | -9.750094  | -2.340557 | -1.493388 |
| H  | -10.078650 | -1.290855 | -1.512999 |
| H  | -9.414986  | -2.623395 | -2.502549 |
| H  | -10.589773 | -2.974781 | -1.201399 |
| C  | -4.052899  | 1.652383  | -0.723355 |
| C  | -4.544800  | 1.978050  | 0.553432  |
| C  | -3.987788  | 2.680055  | -1.658121 |
| C  | -4.950662  | 3.258072  | 0.875241  |
| H  | -4.620452  | 1.184762  | 1.296387  |
| C  | -4.353207  | 3.994506  | -1.341490 |
| H  | -3.643375  | 2.482718  | -2.672148 |
| C  | -4.839942  | 4.287512  | -0.070248 |
| H  | -5.356678  | 3.493543  | 1.857526  |
| H  | -4.263709  | 4.767230  | -2.100666 |
| O  | -5.224906  | 5.526387  | 0.352343  |
| C  | -5.092238  | 6.581310  | -0.572339 |
| H  | -5.711903  | 6.419547  | -1.466304 |
| H  | -5.430672  | 7.482003  | -0.056215 |
| H  | -4.045943  | 6.712756  | -0.887852 |
| Zn | -1.058503  | -0.668055 | -0.396007 |
| Zn | 1.728777   | 0.326457  | 0.979450  |
| C  | -0.924533  | 1.443107  | 2.134344  |
| O  | -0.187542  | 1.530957  | 1.151914  |
| O  | -1.759330  | 2.408448  | 2.472490  |
| C  | -1.697117  | 3.619238  | 1.662876  |
| H  | -2.221621  | 3.413723  | 0.721127  |
| H  | -0.644409  | 3.816354  | 1.434284  |
| C  | -2.333631  | 4.723619  | 2.456584  |
| H  | -3.367564  | 4.480452  | 2.718527  |
| H  | -2.349868  | 5.642265  | 1.859601  |
| H  | -1.776925  | 4.920149  | 3.379369  |
| C  | -0.935693  | 0.293549  | 3.141557  |
| C  | -0.164711  | -0.918339 | 2.563401  |
| O  | -0.492921  | -1.421247 | 1.452310  |
| O  | 0.235194   | -1.751980 | 3.557244  |
| C  | 0.978509   | -2.885407 | 3.087604  |
| H  | 1.762467   | -2.510890 | 2.401864  |
| H  | 0.316444   | -3.540189 | 2.503771  |
| C  | 1.572494   | -3.575563 | 4.284532  |
| H  | 2.236325   | -2.898589 | 4.832870  |

|   |           |           |          |
|---|-----------|-----------|----------|
| H | 2.160358  | -4.442966 | 3.963644 |
| H | 0.792309  | -3.922462 | 4.970838 |
| C | -2.389122 | -0.186075 | 3.317577 |
| H | -2.412324 | -1.104806 | 3.912662 |
| H | -2.829528 | -0.392404 | 2.334991 |
| H | -2.982350 | 0.581159  | 3.824149 |
| C | -0.305013 | 0.800641  | 4.434898 |
| C | -0.736780 | 0.342182  | 5.681123 |
| C | 0.745583  | 1.724102  | 4.393562 |
| C | -0.136594 | 0.793373  | 6.852129 |
| H | -1.546587 | -0.381604 | 5.741170 |
| C | 1.346367  | 2.178678  | 5.563360 |
| H | 1.101417  | 2.102019  | 3.433879 |
| C | 0.906012  | 1.714405  | 6.798919 |
| H | -0.489665 | 0.422422  | 7.812871 |
| H | 2.160339  | 2.898965  | 5.504482 |
| H | 1.370680  | 2.070856  | 7.716542 |
| H | 1.263166  | -0.252023 | 2.408497 |

#### TS5g

M06L SCF energy in Solvent: -7322.529382 a.u.

PBE0-D3BJ Free energy in Solvent: -7321.405038 a.u.

|   |          |           |           |
|---|----------|-----------|-----------|
| O | 0.670151 | -0.503694 | -0.545184 |
| C | 1.151115 | -0.420867 | -1.819269 |
| C | 2.549243 | -0.469159 | -2.067635 |
| C | 2.988534 | -0.398935 | -3.390023 |
| H | 4.059610 | -0.462132 | -3.579830 |
| C | 2.129986 | -0.279053 | -4.482808 |
| C | 0.766891 | -0.254289 | -4.214536 |
| H | 0.055169 | -0.180236 | -5.040142 |
| C | 0.266884 | -0.313549 | -2.913856 |
| C | 2.662656 | -0.179948 | -5.879640 |
| H | 3.450696 | -0.919120 | -6.070139 |
| H | 3.105895 | 0.806172  | -6.074202 |
| H | 1.873627 | -0.333299 | -6.624917 |
| C | 3.564420 | -0.725800 | -0.929812 |
| O | 3.377028 | 0.128701  | 0.167696  |
| C | 5.014251 | -0.448461 | -1.402227 |
| C | 5.418446 | 0.890204  | -1.734712 |
| C | 5.955229 | -1.455926 | -1.475900 |
| C | 4.528930 | 1.997055  | -1.768658 |
| C | 6.785099 | 1.133609  | -2.100142 |
| C | 7.298881 | -1.209634 | -1.827238 |
| H | 5.664945 | -2.478777 | -1.249520 |



|    |           |           |           |   |            |           |           |
|----|-----------|-----------|-----------|---|------------|-----------|-----------|
| C  | 4.958645  | 3.252266  | -2.135696 | O | -3.047885  | -0.335976 | 0.173629  |
| H  | 3.486221  | 1.847903  | -1.502711 | N | -1.740728  | -1.433343 | -1.987440 |
| C  | 7.197374  | 2.442794  | -2.450313 | C | -1.219355  | -0.265417 | -2.728113 |
| C  | 7.709796  | 0.062023  | -2.125830 | H | -1.517591  | 0.636757  | -2.169962 |
| H  | 8.002606  | -2.040178 | -1.856283 | H | -1.717684  | -0.198485 | -3.712256 |
| C  | 6.306696  | 3.487120  | -2.471656 | C | -1.285120  | -2.729736 | -2.511261 |
| H  | 4.244446  | 4.074800  | -2.170739 | H | -1.453544  | -2.765535 | -3.603938 |
| H  | 8.243517  | 2.599219  | -2.715846 | H | -0.208437  | -2.845962 | -2.340424 |
| H  | 8.744985  | 0.270537  | -2.396991 | C | -2.149230  | -3.744946 | -1.773509 |
| H  | 6.633919  | 4.486817  | -2.753810 | H | -1.625862  | -4.124712 | -0.886864 |
| C  | 3.422630  | -2.217546 | -0.509035 | H | -2.370187  | -4.611764 | -2.404919 |
| C  | 3.899288  | -2.692726 | 0.759919  | C | -3.411070  | -2.962369 | -1.372395 |
| C  | 2.863284  | -3.137033 | -1.380575 | H | -3.518610  | -2.919192 | -0.280780 |
| C  | 4.636082  | -1.889417 | 1.674547  | H | -4.335019  | -3.403792 | -1.759138 |
| C  | 3.678113  | -4.068906 | 1.118553  | C | -3.215335  | -1.539322 | -1.907342 |
| C  | 2.678347  | -4.491249 | -1.040024 | H | -3.628923  | -1.458740 | -2.929556 |
| H  | 2.537893  | -2.807001 | -2.364910 | C | -3.826004  | -0.442647 | -0.972589 |
| C  | 5.072604  | -2.395145 | 2.877706  | C | -5.248814  | -0.887165 | -0.588853 |
| H  | 4.836393  | -0.857637 | 1.406965  | C | -6.217445  | -1.164868 | -1.553662 |
| C  | 4.122393  | -4.546046 | 2.377207  | H | -5.975496  | -1.056666 | -2.611960 |
| C  | 3.054321  | -4.946265 | 0.197966  | C | -7.502133  | -1.577998 | -1.208865 |
| H  | 2.224043  | -5.168028 | -1.762854 | H | -8.224528  | -1.787149 | -1.993691 |
| C  | 4.799537  | -3.728106 | 3.247187  | C | -7.846756  | -1.707248 | 0.139019  |
| H  | 5.639445  | -1.754919 | 3.552336  | C | -6.892216  | -1.422951 | 1.118924  |
| H  | 3.931472  | -5.590442 | 2.629063  | H | -7.175004  | -1.522271 | 2.165513  |
| H  | 2.915556  | -5.991221 | 0.478961  | C | -5.615383  | -1.023622 | 0.752177  |
| H  | 5.143370  | -4.110570 | 4.207084  | H | -4.873556  | -0.807086 | 1.517139  |
| H  | 1.114847  | -2.878483 | 0.492755  | O | -9.072162  | -2.097395 | 0.591411  |
| Si | 0.352165  | -3.219767 | 1.679286  | C | -10.046164 | -2.396814 | -0.381915 |
| O  | -1.104865 | -2.416976 | 1.363529  | H | -10.275812 | -1.523620 | -1.010190 |
| O  | -0.083072 | -4.785109 | 1.887597  | H | -9.729979  | -3.226377 | -1.031664 |
| O  | 1.003916  | -2.713796 | 3.099353  | H | -10.942509 | -2.690881 | 0.167820  |
| C  | -2.224848 | -2.629808 | 2.234858  | C | -3.953720  | 0.930187  | -1.659397 |
| H  | -2.000994 | -2.239236 | 3.235783  | C | -3.800571  | 2.083289  | -0.877412 |
| H  | -3.076166 | -2.095086 | 1.802524  | C | -4.282782  | 1.108717  | -3.003280 |
| H  | -2.438445 | -3.702042 | 2.297594  | C | -3.956028  | 3.350881  | -1.413878 |
| C  | 1.508673  | -1.396096 | 3.240240  | H | -3.549381  | 1.964139  | 0.175966  |
| H  | 2.109766  | -1.356374 | 4.153713  | C | -4.433381  | 2.376734  | -3.565506 |
| H  | 2.162387  | -1.117826 | 2.397387  | H | -4.419828  | 0.248381  | -3.658779 |
| H  | 0.685652  | -0.669484 | 3.317394  | C | -4.271003  | 3.509156  | -2.767340 |
| C  | 0.592378  | -5.707739 | 2.720778  | H | -3.839515  | 4.242807  | -0.800930 |
| H  | 1.376936  | -6.229751 | 2.156213  | H | -4.676081  | 2.465629  | -4.621434 |
| H  | 1.051235  | -5.216377 | 3.588004  | O | -4.399729  | 4.792784  | -3.205068 |
| H  | -0.137120 | -6.445629 | 3.070991  | C | -4.720010  | 4.973985  | -4.565366 |

|    |           |           |           |
|----|-----------|-----------|-----------|
| H  | -5.683184 | 4.508050  | -4.820985 |
| H  | -4.789252 | 6.052741  | -4.718796 |
| H  | -3.941564 | 4.562452  | -5.224705 |
| Zn | -1.203770 | -0.796054 | -0.013718 |
| Zn | 1.701323  | 0.809907  | 0.639201  |
| C  | 0.885879  | 2.998435  | 1.061088  |
| O  | 0.788004  | 2.547045  | -0.129524 |
| O  | 1.735100  | 4.025348  | 1.336531  |
| C  | 2.935582  | 3.984275  | 0.555951  |
| H  | 2.674761  | 4.084470  | -0.504650 |
| H  | 3.389726  | 2.983976  | 0.686139  |
| C  | 3.849358  | 5.078077  | 1.034190  |
| H  | 3.389914  | 6.063969  | 0.902112  |
| H  | 4.784428  | 5.053730  | 0.463667  |
| H  | 4.089723  | 4.953094  | 2.095152  |
| C  | -0.393325 | 3.151354  | 1.911295  |
| C  | -1.297322 | 4.112072  | 1.122718  |
| H  | -2.231574 | 4.300087  | 1.660869  |
| H  | -1.521498 | 3.682291  | 0.141251  |
| H  | -0.779437 | 5.062000  | 0.957258  |
| C  | -0.088595 | 3.621718  | 3.328147  |
| C  | -0.254618 | 4.950041  | 3.721880  |
| C  | 0.387107  | 2.702139  | 4.270487  |
| C  | 0.048612  | 5.349240  | 5.020544  |
| H  | -0.622063 | 5.687414  | 3.011756  |
| C  | 0.691593  | 3.098576  | 5.568098  |
| H  | 0.524076  | 1.659038  | 3.980039  |
| C  | 0.522149  | 4.426776  | 5.948772  |
| H  | -0.088423 | 6.390809  | 5.306970  |
| H  | 1.061254  | 2.365948  | 6.283528  |
| H  | 0.755779  | 4.740382  | 6.964706  |
| C  | -1.110276 | 1.809910  | 2.022906  |
| O  | -0.673179 | 0.718168  | 1.656773  |
| O  | -2.265073 | 1.959554  | 2.650932  |
| C  | -2.973629 | 0.759503  | 3.057636  |
| H  | -2.356163 | 0.272940  | 3.826381  |
| H  | -3.057431 | 0.105793  | 2.184874  |
| C  | -4.314867 | 1.191993  | 3.579472  |
| H  | -4.217445 | 1.903959  | 4.405745  |
| H  | -4.870209 | 0.319147  | 3.941653  |
| H  | -4.907608 | 1.657891  | 2.784183  |
| H  | 1.608099  | 1.886082  | 1.943201  |

**TS5h**

M06L SCF energy in Solvent: -7322.530395 a.u.

PBE0-D3BJ Free energy in Solvent: -7321.407954 a.u.

|   |          |           |           |
|---|----------|-----------|-----------|
| O | 0.670151 | -0.503694 | -0.545184 |
| C | 1.151115 | -0.420867 | -1.819269 |
| C | 2.549243 | -0.469159 | -2.067635 |
| C | 2.988534 | -0.398935 | -3.390023 |
| H | 4.059610 | -0.462132 | -3.579830 |
| C | 2.129986 | -0.279053 | -4.482808 |
| C | 0.766891 | -0.254289 | -4.214536 |
| H | 0.055169 | -0.180236 | -5.040142 |
| C | 0.266884 | -0.313549 | -2.913856 |
| C | 2.662656 | -0.179948 | -5.879640 |
| H | 3.450696 | -0.919120 | -6.070139 |
| H | 3.105895 | 0.806172  | -6.074202 |
| H | 1.873627 | -0.333299 | -6.624917 |
| C | 3.564420 | -0.725800 | -0.929812 |
| O | 3.377028 | 0.128701  | 0.167696  |
| C | 5.014251 | -0.448461 | -1.402227 |
| C | 5.418446 | 0.890204  | -1.734712 |
| C | 5.955229 | -1.455926 | -1.475900 |
| C | 4.528930 | 1.997055  | -1.768658 |
| C | 6.785099 | 1.133609  | -2.100142 |
| C | 7.298881 | -1.209634 | -1.827238 |
| H | 5.664945 | -2.478777 | -1.249520 |
| C | 4.958645 | 3.252266  | -2.135696 |
| H | 3.486221 | 1.847903  | -1.502711 |
| C | 7.197374 | 2.442794  | -2.450313 |
| C | 7.709796 | 0.062023  | -2.125830 |
| H | 8.002606 | -2.040178 | -1.856283 |
| C | 6.306696 | 3.487120  | -2.471656 |
| H | 4.244446 | 4.074800  | -2.170739 |
| H | 8.243517 | 2.599219  | -2.715846 |
| H | 8.744985 | 0.270537  | -2.396991 |
| H | 6.633919 | 4.486817  | -2.753810 |
| C | 3.422630 | -2.217546 | -0.509035 |
| C | 3.899288 | -2.692726 | 0.759919  |
| C | 2.863284 | -3.137033 | -1.380575 |
| C | 4.636082 | -1.889417 | 1.674547  |
| C | 3.678113 | -4.068906 | 1.118553  |
| C | 2.678347 | -4.491249 | -1.040024 |
| H | 2.537893 | -2.807001 | -2.364910 |
| C | 5.072604 | -2.395145 | 2.877706  |
| H | 4.836393 | -0.857637 | 1.406965  |
| C | 4.122393 | -4.546046 | 2.377207  |

|    |           |           |           |    |            |           |           |
|----|-----------|-----------|-----------|----|------------|-----------|-----------|
| C  | 3.054321  | -4.946265 | 0.197966  | C  | -7.502133  | -1.577998 | -1.208865 |
| H  | 2.224043  | -5.168028 | -1.762854 | H  | -8.224528  | -1.787149 | -1.993691 |
| C  | 4.799537  | -3.728106 | 3.247187  | C  | -7.846756  | -1.707248 | 0.139019  |
| H  | 5.639445  | -1.754919 | 3.552336  | C  | -6.892216  | -1.422951 | 1.118924  |
| H  | 3.931472  | -5.590442 | 2.629063  | H  | -7.175004  | -1.522271 | 2.165513  |
| H  | 2.915556  | -5.991221 | 0.478961  | C  | -5.615383  | -1.023622 | 0.752177  |
| H  | 5.143370  | -4.110570 | 4.207084  | H  | -4.873556  | -0.807086 | 1.517139  |
| H  | 1.114847  | -2.878483 | 0.492755  | O  | -9.072162  | -2.097395 | 0.591411  |
| Si | 0.352165  | -3.219767 | 1.679286  | C  | -10.046164 | -2.396814 | -0.381915 |
| O  | -1.104865 | -2.416976 | 1.363529  | H  | -10.275812 | -1.523620 | -1.010190 |
| O  | -0.083072 | -4.785109 | 1.887597  | H  | -9.729979  | -3.226377 | -1.031664 |
| O  | 1.003916  | -2.713796 | 3.099353  | H  | -10.942509 | -2.690881 | 0.167820  |
| C  | -2.224848 | -2.629808 | 2.234858  | C  | -3.953720  | 0.930187  | -1.659397 |
| H  | -2.000994 | -2.239236 | 3.235783  | C  | -3.800571  | 2.083289  | -0.877412 |
| H  | -3.076166 | -2.095086 | 1.802524  | C  | -4.282782  | 1.108717  | -3.003280 |
| H  | -2.438445 | -3.702042 | 2.297594  | C  | -3.956028  | 3.350881  | -1.413878 |
| C  | 1.508673  | -1.396096 | 3.240240  | H  | -3.549381  | 1.964139  | 0.175966  |
| H  | 2.109766  | -1.356374 | 4.153713  | C  | -4.433381  | 2.376734  | -3.565506 |
| H  | 2.162387  | -1.117826 | 2.397387  | H  | -4.419828  | 0.248381  | -3.658779 |
| H  | 0.685652  | -0.669484 | 3.317394  | C  | -4.271003  | 3.509156  | -2.767340 |
| C  | 0.592378  | -5.707739 | 2.720778  | H  | -3.839515  | 4.242807  | -0.800930 |
| H  | 1.376936  | -6.229751 | 2.156213  | H  | -4.676081  | 2.465629  | -4.621434 |
| H  | 1.051235  | -5.216377 | 3.588004  | O  | -4.399729  | 4.792784  | -3.205068 |
| H  | -0.137120 | -6.445629 | 3.070991  | C  | -4.720010  | 4.973985  | -4.565366 |
| O  | -3.047885 | -0.335976 | 0.173629  | H  | -5.683184  | 4.508050  | -4.820985 |
| N  | -1.740728 | -1.433343 | -1.987440 | H  | -4.789252  | 6.052741  | -4.718796 |
| C  | -1.219355 | -0.265417 | -2.728113 | H  | -3.941564  | 4.562452  | -5.224705 |
| H  | -1.517591 | 0.636757  | -2.169962 | Zn | -1.203770  | -0.796054 | -0.013718 |
| H  | -1.717684 | -0.198485 | -3.712256 | Zn | 1.701323   | 0.809907  | 0.639201  |
| C  | -1.285120 | -2.729736 | -2.511261 | C  | 0.885879   | 2.998435  | 1.061088  |
| H  | -1.453544 | -2.765535 | -3.603938 | O  | 0.788004   | 2.547045  | -0.129524 |
| H  | -0.208437 | -2.845962 | -2.340424 | O  | 1.735100   | 4.025348  | 1.336531  |
| C  | -2.149230 | -3.744946 | -1.773509 | C  | 2.935582   | 3.984275  | 0.555951  |
| H  | -1.625862 | -4.124712 | -0.886864 | H  | 2.674761   | 4.084470  | -0.504650 |
| H  | -2.370187 | -4.611764 | -2.404919 | H  | 3.389726   | 2.983976  | 0.686139  |
| C  | -3.411070 | -2.962369 | -1.372395 | C  | 3.849358   | 5.078077  | 1.034190  |
| H  | -3.518610 | -2.919192 | -0.280780 | H  | 3.389914   | 6.063969  | 0.902112  |
| H  | -4.335019 | -3.403792 | -1.759138 | H  | 4.784428   | 5.053730  | 0.463667  |
| C  | -3.215335 | -1.539322 | -1.907342 | H  | 4.089723   | 4.953094  | 2.095152  |
| H  | -3.628923 | -1.458740 | -2.929556 | C  | -0.393325  | 3.151354  | 1.911295  |
| C  | -3.826004 | -0.442647 | -0.972589 | C  | -1.297322  | 4.112072  | 1.122718  |
| C  | -5.248814 | -0.887165 | -0.588853 | H  | -2.231574  | 4.300087  | 1.660869  |
| C  | -6.217445 | -1.164868 | -1.553662 | H  | -1.521498  | 3.682291  | 0.141251  |
| H  | -5.975496 | -1.056666 | -2.611960 | H  | -0.779437  | 5.062000  | 0.957258  |

|   |           |          |          |
|---|-----------|----------|----------|
| C | -0.088595 | 3.621718 | 3.328147 |
| C | -0.254618 | 4.950041 | 3.721880 |
| C | 0.387107  | 2.702139 | 4.270487 |
| C | 0.048612  | 5.349240 | 5.020544 |
| H | -0.622063 | 5.687414 | 3.011756 |
| C | 0.691593  | 3.098576 | 5.568098 |
| H | 0.524076  | 1.659038 | 3.980039 |
| C | 0.522149  | 4.426776 | 5.948772 |
| H | -0.088423 | 6.390809 | 5.306970 |
| H | 1.061254  | 2.365948 | 6.283528 |
| H | 0.755779  | 4.740382 | 6.964706 |
| C | -1.110276 | 1.809910 | 2.022906 |
| O | -0.673179 | 0.718168 | 1.656773 |
| O | -2.265073 | 1.959554 | 2.650932 |
| C | -2.973629 | 0.759503 | 3.057636 |
| H | -2.356163 | 0.272940 | 3.826381 |
| H | -3.057431 | 0.105793 | 2.184874 |
| C | -4.314867 | 1.191993 | 3.579472 |
| H | -4.217445 | 1.903959 | 4.405745 |
| H | -4.870209 | 0.319147 | 3.941653 |
| H | -4.907608 | 1.657891 | 2.784183 |
| H | 1.608099  | 1.886082 | 1.943201 |

### TS6e

M06L SCF energy in Solvent: -7957.811715 a.u.

PBE0-D3BJ Free energy in Solvent: -7956.552418 a.u.

|   |           |           |           |
|---|-----------|-----------|-----------|
| O | 0.340107  | -0.344259 | -1.165604 |
| C | 0.689201  | 0.541271  | -2.124357 |
| C | 2.056200  | 0.781240  | -2.426038 |
| C | 2.365387  | 1.643513  | -3.477801 |
| H | 3.414853  | 1.805475  | -3.722480 |
| C | 1.401638  | 2.299933  | -4.244259 |
| C | 0.070787  | 2.050970  | -3.931403 |
| H | -0.718924 | 2.536694  | -4.509798 |
| C | -0.302181 | 1.198264  | -2.891321 |
| C | 1.793795  | 3.231051  | -5.350996 |
| H | 2.530360  | 2.777529  | -6.026486 |
| H | 2.251587  | 4.152339  | -4.965334 |
| H | 0.928045  | 3.526452  | -5.955019 |
| C | 3.186597  | 0.039276  | -1.678313 |
| O | 3.018443  | 0.066244  | -0.285317 |
| C | 4.533447  | 0.758463  | -1.919716 |
| C | 4.746964  | 2.064007  | -1.360399 |
| C | 5.550289  | 0.177244  | -2.647807 |

|    |           |           |           |
|----|-----------|-----------|-----------|
| C  | 3.741048  | 2.797448  | -0.676106 |
| C  | 6.022824  | 2.695632  | -1.532719 |
| C  | 6.804235  | 0.801775  | -2.815085 |
| H  | 5.390435  | -0.800127 | -3.099273 |
| C  | 3.977900  | 4.060395  | -0.184203 |
| H  | 2.768594  | 2.339155  | -0.533905 |
| C  | 6.243618  | 3.985643  | -0.988621 |
| C  | 7.042156  | 2.030943  | -2.256798 |
| H  | 7.581208  | 0.295068  | -3.385356 |
| C  | 5.246192  | 4.660466  | -0.326981 |
| H  | 3.176004  | 4.592331  | 0.330052  |
| H  | 7.226162  | 4.439656  | -1.121524 |
| H  | 8.008816  | 2.521815  | -2.372402 |
| H  | 5.428748  | 5.655487  | 0.077505  |
| C  | 3.229123  | -1.431664 | -2.164394 |
| C  | 4.005230  | -2.413230 | -1.455497 |
| C  | 2.475520  | -1.850698 | -3.245000 |
| C  | 4.892260  | -2.092656 | -0.391072 |
| C  | 3.919707  | -3.791568 | -1.851685 |
| C  | 2.386474  | -3.205002 | -3.624513 |
| H  | 1.905135  | -1.119656 | -3.813594 |
| C  | 5.636108  | -3.066509 | 0.237567  |
| H  | 4.963858  | -1.058923 | -0.067365 |
| C  | 4.686781  | -4.768759 | -1.169398 |
| C  | 3.083154  | -4.162630 | -2.932137 |
| H  | 1.754716  | -3.482056 | -4.468399 |
| C  | 5.532528  | -4.419078 | -0.145329 |
| H  | 6.311678  | -2.785097 | 1.045001  |
| H  | 4.597923  | -5.808548 | -1.487367 |
| H  | 3.029686  | -5.214288 | -3.215856 |
| H  | 6.122165  | -5.178748 | 0.365871  |
| H  | 1.335542  | -2.701612 | -0.931346 |
| Si | 0.315314  | -3.655259 | -0.510037 |
| O  | -0.954558 | -2.718785 | 0.094535  |
| O  | -0.426331 | -4.543801 | -1.679384 |
| O  | 0.923776  | -4.714556 | 0.582081  |
| C  | -1.955360 | -3.400462 | 0.882501  |
| H  | -1.544087 | -3.585483 | 1.880373  |
| H  | -2.833551 | -2.748555 | 0.926208  |
| H  | -2.228837 | -4.345969 | 0.399323  |
| C  | 2.136793  | -4.474169 | 1.282670  |
| H  | 2.735941  | -5.391622 | 1.258956  |
| H  | 2.730469  | -3.669282 | 0.819584  |
| H  | 1.914326  | -4.198142 | 2.319272  |

|   |            |           |           |    |           |           |           |
|---|------------|-----------|-----------|----|-----------|-----------|-----------|
| C | 0.106318   | -5.742280 | -2.208253 | H  | -3.318882 | 3.835635  | 1.646092  |
| H | 0.372662   | -5.593305 | -3.262399 | H  | -5.181187 | 4.355643  | -2.191458 |
| H | 0.998097   | -6.078464 | -1.661447 | O  | -4.186772 | 5.594763  | 0.040076  |
| H | -0.657828  | -6.525444 | -2.143155 | C  | -4.671388 | 6.471649  | -0.948888 |
| O | -3.304690  | -0.644949 | 0.087639  | H  | -5.739635 | 6.306314  | -1.154014 |
| N | -2.240409  | -0.314139 | -2.434429 | H  | -4.533640 | 7.481105  | -0.554840 |
| C | -1.767814  | 1.072942  | -2.592668 | H  | -4.112349 | 6.368929  | -1.891584 |
| H | -2.011365  | 1.614066  | -1.663854 | Zn | -1.480292 | -0.698540 | -0.444493 |
| H | -2.350448  | 1.572760  | -3.389950 | Zn | 1.461875  | -0.489182 | 0.594913  |
| C | -1.849692  | -1.202112 | -3.538749 | C  | 1.776709  | 1.856382  | 2.680634  |
| H | -2.076398  | -0.714498 | -4.505767 | O  | 2.307078  | 0.851139  | 2.228420  |
| H | -0.767502  | -1.383369 | -3.501855 | O  | 2.481579  | 2.893809  | 3.112716  |
| C | -2.688523  | -2.452057 | -3.317556 | C  | 3.927705  | 2.742115  | 3.028875  |
| H | -2.128172  | -3.181740 | -2.721577 | H  | 4.182420  | 2.439663  | 2.006956  |
| H | -2.935236  | -2.939061 | -4.267203 | H  | 4.212965  | 1.926896  | 3.705030  |
| C | -3.930361  | -1.962558 | -2.557038 | C  | 4.534906  | 4.060318  | 3.413575  |
| H | -4.044473  | -2.493065 | -1.603253 | H  | 4.194073  | 4.856188  | 2.742843  |
| H | -4.861032  | -2.114878 | -3.113586 | H  | 5.625449  | 3.999315  | 3.334832  |
| C | -3.704888  | -0.471404 | -2.275805 | H  | 4.277262  | 4.339944  | 4.440666  |
| H | -4.206916  | 0.148876  | -3.041728 | C  | 0.272631  | 2.073795  | 2.830908  |
| C | -4.163289  | -0.061001 | -0.836692 | C  | -0.483189 | 0.761068  | 2.465331  |
| C | -5.588087  | -0.584052 | -0.602257 | O  | -0.406434 | 0.290221  | 1.276763  |
| C | -6.602680  | -0.422684 | -1.545698 | O  | -1.631603 | 0.682351  | 3.168073  |
| H | -6.389030  | 0.064204  | -2.498147 | C  | -2.351523 | -0.563627 | 3.058580  |
| C | -7.900709  | -0.874359 | -1.316441 | H  | -1.610557 | -1.376048 | 3.104636  |
| H | -8.658790  | -0.733791 | -2.082410 | H  | -2.854639 | -0.602562 | 2.084840  |
| C | -8.206411  | -1.500805 | -0.106900 | C  | -3.317096 | -0.629346 | 4.209055  |
| C | -7.202805  | -1.667251 | 0.851499  | H  | -2.793228 | -0.548110 | 5.168394  |
| H | -7.457524  | -2.158242 | 1.788779  | H  | -3.852113 | -1.586289 | 4.187352  |
| C | -5.915959  | -1.215309 | 0.601338  | H  | -4.060245 | 0.174036  | 4.148177  |
| H | -5.134946  | -1.348597 | 1.347191  | C  | -0.003681 | 2.431166  | 4.293425  |
| O | -9.439998  | -1.979560 | 0.226886  | H  | 0.581476  | 3.304027  | 4.593411  |
| C | -10.467349 | -1.806723 | -0.720838 | H  | 0.264072  | 1.583779  | 4.935613  |
| H | -10.644603 | -0.742988 | -0.939351 | H  | -1.065123 | 2.638528  | 4.445826  |
| H | -10.244368 | -2.327852 | -1.664008 | C  | -0.109739 | 3.175626  | 1.833623  |
| H | -11.366587 | -2.237746 | -0.275675 | C  | -0.690625 | 4.374747  | 2.249520  |
| C | -4.202666  | 1.468408  | -0.655663 | C  | 0.183290  | 3.012186  | 0.472283  |
| C | -3.695678  | 2.036205  | 0.519530  | C  | -0.996356 | 5.371887  | 1.325301  |
| C | -4.751547  | 2.335085  | -1.601940 | H  | -0.915235 | 4.537441  | 3.301414  |
| C | -3.720051  | 3.404398  | 0.732350  | C  | -0.118945 | 4.007243  | -0.450510 |
| H | -3.261815  | 1.383781  | 1.273912  | H  | 0.656542  | 2.095461  | 0.120171  |
| C | -4.761295  | 3.717287  | -1.417972 | C  | -0.719623 | 5.190223  | -0.025553 |
| H | -5.177796  | 1.942267  | -2.525181 | H  | -1.474354 | 6.289345  | 1.664909  |
| C | -4.238274  | 4.259560  | -0.242905 | H  | 0.126679  | 3.848740  | -1.501003 |

|    |           |           |           |
|----|-----------|-----------|-----------|
| H  | -0.973342 | 5.968083  | -0.744346 |
| H  | 1.238618  | -1.586815 | 1.913990  |
| H  | 0.332283  | -0.210446 | 3.187176  |
| Si | 1.120840  | -1.533323 | 3.600178  |
| O  | 0.219541  | -2.939594 | 3.430931  |
| O  | 2.764438  | -1.690209 | 3.781699  |
| O  | 0.769024  | -1.028503 | 5.179855  |
| C  | -0.424037 | -3.586102 | 4.507633  |
| H  | -1.272156 | -4.157881 | 4.107946  |
| H  | 0.257407  | -4.291175 | 5.005563  |
| H  | -0.796800 | -2.871166 | 5.253202  |
| C  | 1.492120  | -1.483678 | 6.298784  |
| H  | 2.548760  | -1.191070 | 6.244677  |
| H  | 1.045220  | -1.041217 | 7.197748  |
| H  | 1.453867  | -2.580722 | 6.405641  |
| C  | 3.753069  | -1.849477 | 2.802322  |
| H  | 4.122652  | -2.885835 | 2.792489  |
| H  | 3.400252  | -1.604823 | 1.788670  |
| H  | 4.591821  | -1.176886 | 3.026290  |

**TS6f**

M06L SCF energy in Solvent: -7957.813383 a.u.

PBE0-D3BJ Free energy in Solvent: -7956.557467 a.u.

|   |           |           |           |
|---|-----------|-----------|-----------|
| O | 0.500400  | -0.442532 | -0.795883 |
| C | 0.876819  | -0.103664 | -2.058041 |
| C | 2.244815  | -0.076566 | -2.446406 |
| C | 2.541453  | 0.318396  | -3.752384 |
| H | 3.585989  | 0.329104  | -4.060512 |
| C | 1.576494  | 0.664910  | -4.698484 |
| C | 0.246245  | 0.556475  | -4.312182 |
| H | -0.545725 | 0.765408  | -5.035671 |
| C | -0.119794 | 0.180501  | -3.019237 |
| C | 1.966328  | 1.117829  | -6.072175 |
| H | 1.143064  | 1.002407  | -6.787042 |
| H | 2.825889  | 0.556078  | -6.457258 |
| H | 2.255321  | 2.177758  | -6.081822 |
| C | 3.391818  | -0.623833 | -1.551571 |
| O | 3.348371  | -0.178914 | -0.226541 |
| C | 4.762743  | -0.149825 | -2.088556 |
| C | 5.130756  | 1.233563  | -1.975102 |
| C | 5.665896  | -1.033297 | -2.642933 |
| C | 4.254298  | 2.243779  | -1.496468 |
| C | 6.441037  | 1.638949  | -2.397104 |
| C | 6.951475  | -0.628935 | -3.059744 |

|    |           |           |           |
|----|-----------|-----------|-----------|
| H  | 5.387501  | -2.080000 | -2.752325 |
| C  | 4.650350  | 3.560281  | -1.425353 |
| H  | 3.255775  | 1.973481  | -1.169893 |
| C  | 6.821434  | 2.999797  | -2.291439 |
| C  | 7.337041  | 0.679386  | -2.927466 |
| H  | 7.634253  | -1.366254 | -3.479135 |
| C  | 5.948425  | 3.947169  | -1.815153 |
| H  | 3.944990  | 4.309401  | -1.064870 |
| H  | 7.826227  | 3.280126  | -2.609598 |
| H  | 8.330293  | 1.005800  | -3.237187 |
| H  | 6.251502  | 4.991059  | -1.747818 |
| C  | 3.302168  | -2.174477 | -1.553545 |
| C  | 4.002521  | -2.938632 | -0.556631 |
| C  | 2.513297  | -2.853153 | -2.464623 |
| C  | 4.963568  | -2.382507 | 0.333891  |
| C  | 3.754591  | -4.350096 | -0.460727 |
| C  | 2.297370  | -4.244432 | -2.386787 |
| H  | 2.008359  | -2.297218 | -3.252143 |
| C  | 5.599874  | -3.159769 | 1.274983  |
| H  | 5.189171  | -1.324132 | 0.262746  |
| C  | 4.403881  | -5.112127 | 0.543035  |
| C  | 2.880475  | -4.976362 | -1.383494 |
| H  | 1.645418  | -4.725806 | -3.116574 |
| C  | 5.308017  | -4.533357 | 1.398938  |
| H  | 6.340220  | -2.704585 | 1.932215  |
| H  | 4.178155  | -6.177425 | 0.607545  |
| H  | 2.714839  | -6.051132 | -1.298844 |
| H  | 5.807584  | -5.132138 | 2.159218  |
| H  | 1.280945  | -2.843644 | -0.185718 |
| Si | 0.415635  | -3.549687 | 0.741513  |
| O  | -0.708211 | -2.365274 | 1.179796  |
| O  | -0.517486 | -4.761687 | 0.147009  |
| O  | 1.199944  | -4.126146 | 2.062333  |
| C  | -1.618421 | -2.676158 | 2.250969  |
| H  | -1.180152 | -2.329279 | 3.192596  |
| H  | -2.559735 | -2.157263 | 2.043038  |
| H  | -1.802257 | -3.755828 | 2.293169  |
| C  | 2.166228  | -3.291979 | 2.696164  |
| H  | 2.842581  | -3.933524 | 3.269344  |
| H  | 2.766170  | -2.733257 | 1.958979  |
| H  | 1.673600  | -2.575841 | 3.368668  |
| C  | -0.118790 | -6.113830 | 0.035181  |
| H  | 0.213242  | -6.325872 | -0.990062 |
| H  | 0.692711  | -6.364245 | 0.731661  |

|    |            |           |           |    |           |           |           |
|----|------------|-----------|-----------|----|-----------|-----------|-----------|
| H  | -0.984259  | -6.745990 | 0.261982  | O  | -5.141058 | 4.950825  | -1.923315 |
| Zn | -1.322538  | -0.781480 | -0.081396 | C  | -5.502932 | 5.361076  | -3.220723 |
| O  | -3.162700  | -0.574574 | 0.334312  | H  | -6.428181 | 4.871953  | -3.559557 |
| N  | -1.975654  | -1.202320 | -2.089789 | H  | -5.665341 | 6.439603  | -3.164091 |
| C  | -1.587504  | 0.079397  | -2.710351 | H  | -4.706912 | 5.151927  | -3.951532 |
| H  | -1.912325  | 0.880877  | -2.027729 | Zn | 1.742825  | 0.189407  | 0.655443  |
| H  | -2.161353  | 0.231014  | -3.643647 | C  | -1.083640 | 1.732486  | 2.069091  |
| C  | -1.412660  | -2.394575 | -2.767843 | O  | -0.727034 | 0.707640  | 1.486787  |
| H  | -1.280434  | -2.188307 | -3.842273 | O  | -2.083244 | 1.763087  | 2.930857  |
| H  | -0.412046  | -2.601356 | -2.359216 | C  | -2.746356 | 0.494754  | 3.215218  |
| C  | -2.415995  | -3.523795 | -2.515807 | H  | -3.140481 | 0.102901  | 2.269229  |
| H  | -1.938570  | -4.405663 | -2.076086 | H  | -1.971751 | -0.188326 | 3.582055  |
| H  | -2.874672  | -3.836967 | -3.461765 | C  | -3.816250 | 0.772093  | 4.231755  |
| C  | -3.466268  | -2.914191 | -1.592136 | H  | -4.564548 | 1.469491  | 3.839344  |
| H  | -3.194537  | -3.050258 | -0.533891 | H  | -4.330647 | -0.162249 | 4.483683  |
| H  | -4.463703  | -3.343298 | -1.726420 | H  | -3.401545 | 1.193206  | 5.154457  |
| C  | -3.430638  | -1.423702 | -1.909192 | C  | -0.397395 | 3.088921  | 1.900277  |
| H  | -3.958543  | -1.230423 | -2.862176 | C  | 1.134663  | 2.792215  | 1.779800  |
| C  | -4.022495  | -0.538271 | -0.757109 | O  | 1.579048  | 2.149892  | 0.773845  |
| C  | -5.376518  | -1.151464 | -0.361625 | O  | 1.863894  | 3.874872  | 2.207627  |
| C  | -6.442557  | -1.203948 | -1.258916 | C  | 3.280733  | 3.650324  | 2.146870  |
| H  | -6.333762  | -0.764506 | -2.251369 | H  | 3.514703  | 2.802332  | 2.817329  |
| C  | -7.656821  | -1.798348 | -0.923223 | H  | 3.562326  | 3.347962  | 1.131312  |
| H  | -8.462060  | -1.820468 | -1.653327 | C  | 3.971790  | 4.912549  | 2.582189  |
| C  | -7.825017  | -2.347855 | 0.350313  | H  | 3.708675  | 5.183326  | 3.611338  |
| C  | -6.771230  | -2.290765 | 1.265870  | H  | 5.057795  | 4.781229  | 2.528640  |
| H  | -6.921194  | -2.717596 | 2.255508  | H  | 3.698290  | 5.749445  | 1.930008  |
| C  | -5.566750  | -1.703157 | 0.908000  | C  | -0.656931 | 3.957704  | 3.126486  |
| H  | -4.744226  | -1.664501 | 1.619577  | H  | -1.725332 | 4.148452  | 3.257020  |
| O  | -8.967523  | -2.950275 | 0.788788  | H  | -0.294008 | 3.444558  | 4.024615  |
| C  | -10.036844 | -3.028220 | -0.125007 | H  | -0.129817 | 4.910077  | 3.040367  |
| H  | -10.380473 | -2.030690 | -0.436542 | C  | -0.896622 | 3.706944  | 0.587081  |
| H  | -9.763251  | -3.602821 | -1.022605 | C  | -0.791960 | 2.997972  | -0.619034 |
| H  | -10.846212 | -3.541115 | 0.398438  | C  | -1.456168 | 4.987095  | 0.557535  |
| C  | -4.285541  | 0.922324  | -1.172209 | C  | -1.215431 | 3.564449  | -1.815998 |
| C  | -4.233746  | 1.911913  | -0.178043 | H  | -0.353561 | 2.002247  | -0.624811 |
| C  | -4.653104  | 1.328668  | -2.454415 | C  | -1.889047 | 5.549069  | -0.641706 |
| C  | -4.526836  | 3.236296  | -0.450612 | H  | -1.555278 | 5.560772  | 1.476105  |
| H  | -3.955159  | 1.619964  | 0.833002  | C  | -1.764660 | 4.842707  | -1.832905 |
| C  | -4.942036  | 2.661801  | -2.754198 | H  | -1.111096 | 2.997702  | -2.741648 |
| H  | -4.711053  | 0.604818  | -3.267580 | H  | -2.331878 | 6.543865  | -0.639147 |
| C  | -4.882890  | 3.623236  | -1.746088 | H  | -2.103374 | 5.283675  | -2.769331 |
| H  | -4.463907  | 3.999760  | 0.322412  | H  | 1.652611  | -0.041240 | 2.348193  |
| H  | -5.210417  | 2.932882  | -3.772292 | H  | 1.264481  | 1.923678  | 2.856848  |

|    |           |           |          |
|----|-----------|-----------|----------|
| Si | 1.603278  | 0.602609  | 3.843050 |
| O  | 0.450568  | -0.564054 | 4.172461 |
| O  | 3.220451  | 0.331099  | 4.101928 |
| O  | 1.290688  | 1.597173  | 5.167247 |
| C  | -0.113317 | -0.718237 | 5.463543 |
| H  | -0.782603 | -1.588095 | 5.430351 |
| H  | 0.655065  | -0.894546 | 6.226634 |
| H  | -0.688324 | 0.168260  | 5.759730 |
| C  | 2.083864  | 2.732041  | 5.425498 |
| H  | 1.775024  | 3.150393  | 6.390494 |
| H  | 3.152076  | 2.476983  | 5.477451 |
| H  | 1.941988  | 3.505177  | 4.653639 |
| C  | 4.121104  | -0.375278 | 3.281049 |
| H  | 3.777620  | -0.473409 | 2.238848 |
| H  | 5.079148  | 0.159017  | 3.269864 |
| H  | 4.287961  | -1.384032 | 3.685149 |

### TS6g

M06L SCF energy in Solvent: -7957.805665 a.u.

PBE0-D3BJ Free energy in Solvent: -7956.547141 a.u.

|   |           |           |          |
|---|-----------|-----------|----------|
| O | -0.803839 | -0.754742 | 0.555042 |
| C | -1.226073 | -0.648478 | 1.848596 |
| C | -2.611922 | -0.563748 | 2.165551 |
| C | -2.982813 | -0.502899 | 3.509181 |
| H | -4.046065 | -0.471982 | 3.745203 |
| C | -2.072352 | -0.490963 | 4.566660 |
| C | -0.725995 | -0.557229 | 4.233802 |
| H | 0.030149  | -0.554406 | 5.023043 |
| C | -0.296134 | -0.631533 | 2.908170 |
| C | -2.536869 | -0.403814 | 5.988227 |
| H | -3.000112 | 0.568129  | 6.205340 |
| H | -1.707647 | -0.536288 | 6.692673 |
| H | -3.292427 | -1.165815 | 6.218360 |
| C | -3.699360 | -0.594078 | 1.065816 |
| O | -3.436877 | 0.347639  | 0.070816 |
| C | -5.083510 | -0.180655 | 1.629955 |
| C | -5.301403 | 1.172532  | 2.067727 |
| C | -6.140760 | -1.066109 | 1.674370 |
| C | -4.284233 | 2.164481  | 2.115700 |
| C | -6.609576 | 1.552199  | 2.518727 |
| C | -7.426342 | -0.684219 | 2.111633 |
| H | -5.991708 | -2.095152 | 1.355914 |
| C | -4.543056 | 3.438384  | 2.565231 |
| H | -3.284335 | 1.909322  | 1.780175 |

|    |           |           |           |
|----|-----------|-----------|-----------|
| C  | -6.843548 | 2.876580  | 2.964532  |
| C  | -7.659010 | 0.601210  | 2.521818  |
| H  | -8.228768 | -1.420549 | 2.116501  |
| C  | -5.834805 | 3.807244  | 2.989180  |
| H  | -3.737517 | 4.171692  | 2.590095  |
| H  | -7.849681 | 3.138170  | 3.294115  |
| H  | -8.647068 | 0.914132  | 2.860514  |
| H  | -6.027976 | 4.821226  | 3.336494  |
| C  | -3.771199 | -2.044370 | 0.513475  |
| C  | -4.240668 | -2.341707 | -0.810516 |
| C  | -3.430324 | -3.101990 | 1.340353  |
| C  | -4.754878 | -1.364539 | -1.709883 |
| C  | -4.242651 | -3.710170 | -1.255965 |
| C  | -3.471731 | -4.443109 | 0.914310  |
| H  | -3.106562 | -2.893191 | 2.358300  |
| C  | -5.186469 | -1.711016 | -2.970767 |
| H  | -4.796722 | -0.332828 | -1.378157 |
| C  | -4.669359 | -4.023078 | -2.570546 |
| C  | -3.849625 | -4.742545 | -0.371016 |
| H  | -3.184499 | -5.235683 | 1.605275  |
| C  | -5.128569 | -3.046262 | -3.419135 |
| H  | -5.579699 | -0.938263 | -3.631214 |
| H  | -4.629552 | -5.065750 | -2.888486 |
| H  | -3.885272 | -5.773797 | -0.724002 |
| H  | -5.459014 | -3.301280 | -4.425314 |
| H  | -1.513443 | -2.998446 | -0.397978 |
| Si | -0.686165 | -3.906428 | -1.173130 |
| O  | 0.812971  | -3.133385 | -1.094237 |
| O  | -0.404984 | -5.407572 | -0.577338 |
| O  | -1.167367 | -4.086157 | -2.736442 |
| C  | 1.929195  | -3.752564 | -1.747702 |
| H  | 1.785479  | -3.730904 | -2.835034 |
| H  | 2.824400  | -3.185430 | -1.476724 |
| H  | 2.028288  | -4.791163 | -1.409819 |
| C  | -1.542647 | -2.915921 | -3.449365 |
| H  | -0.658475 | -2.329782 | -3.743428 |
| H  | -2.086451 | -3.225838 | -4.347176 |
| H  | -2.208635 | -2.273211 | -2.851143 |
| C  | -1.066109 | -6.587957 | -0.986889 |
| H  | -1.760979 | -6.915371 | -0.203029 |
| H  | -1.623448 | -6.444893 | -1.922009 |
| H  | -0.315280 | -7.371568 | -1.140030 |
| Zn | 1.034076  | -1.219590 | -0.090325 |
| O  | 2.911568  | -0.970159 | -0.272147 |



|   |           |           |           |    |           |           |           |
|---|-----------|-----------|-----------|----|-----------|-----------|-----------|
| N | 1.591887  | -1.910307 | 1.945747  | H  | 5.246713  | 5.584873  | 4.151265  |
| C | 1.172224  | -0.689821 | 2.647943  | H  | 4.332287  | 4.193003  | 4.799408  |
| H | 1.485858  | 0.155910  | 2.020190  | Zn | -1.730135 | 0.715173  | -0.569145 |
| H | 1.726181  | -0.596874 | 3.602662  | C  | 0.355597  | 2.974394  | 0.338241  |
| C | 1.079347  | -3.154476 | 2.536903  | O  | 0.319134  | 1.752768  | 0.214647  |
| H | 1.205512  | -3.122679 | 3.635920  | O  | 0.711593  | 3.581031  | 1.460694  |
| H | 0.004334  | -3.254242 | 2.335122  | C  | 1.003764  | 2.727641  | 2.598556  |
| C | 1.935336  | -4.244821 | 1.904775  | H  | 0.132871  | 2.081041  | 2.771553  |
| H | 1.431208  | -4.665039 | 1.027211  | H  | 1.857884  | 2.095406  | 2.334696  |
| H | 2.096664  | -5.073010 | 2.602951  | C  | 1.309886  | 3.625421  | 3.762487  |
| C | 3.242157  | -3.539000 | 1.508922  | H  | 0.450521  | 4.250870  | 4.026668  |
| H | 3.432325  | -3.624134 | 0.433871  | H  | 1.570403  | 3.013154  | 4.633723  |
| H | 4.122205  | -3.958596 | 2.007525  | H  | 2.160261  | 4.276749  | 3.532591  |
| C | 3.058758  | -2.065351 | 1.883826  | C  | 0.017899  | 3.965350  | -0.767166 |
| H | 3.463193  | -1.894960 | 2.899429  | C  | -1.017915 | 3.289218  | -1.710896 |
| C | 3.695667  | -1.055184 | 0.868791  | O  | -1.978107 | 2.632465  | -1.194810 |
| C | 5.087994  | -1.588063 | 0.486628  | O  | -1.277463 | 4.162172  | -2.736369 |
| C | 6.050119  | -1.881753 | 1.452688  | C  | -2.269578 | 3.718430  | -3.665471 |
| H | 5.825323  | -1.718079 | 2.508131  | H  | -1.888919 | 2.801485  | -4.145387 |
| C | 7.303844  | -2.383964 | 1.112359  | H  | -3.187151 | 3.458811  | -3.122786 |
| H | 8.023557  | -2.603514 | 1.896932  | C  | -2.482005 | 4.817743  | -4.670669 |
| C | 7.619134  | -2.591350 | -0.232783 | H  | -1.550713 | 5.058526  | -5.195423 |
| C | 6.671521  | -2.288707 | -1.213912 | H  | -3.225156 | 4.511387  | -5.414546 |
| H | 6.936213  | -2.448359 | -2.257409 | H  | -2.843485 | 5.729570  | -4.183181 |
| C | 5.425846  | -1.795218 | -0.853199 | C  | -0.700354 | 5.181146  | -0.164149 |
| H | 4.688402  | -1.551727 | -1.615327 | H  | -1.057724 | 5.842397  | -0.957051 |
| O | 8.812671  | -3.075887 | -0.681945 | H  | -1.570386 | 4.849473  | 0.411845  |
| C | 9.780614  | -3.389109 | 0.292168  | H  | -0.033639 | 5.738159  | 0.499221  |
| H | 10.066937 | -2.505078 | 0.881209  | C  | 1.308685  | 4.329056  | -1.495263 |
| H | 9.427563  | -4.171972 | 0.980071  | C  | 1.590399  | 5.643036  | -1.880789 |
| H | 10.652280 | -3.755605 | -0.253852 | C  | 2.230645  | 3.328003  | -1.819202 |
| C | 3.920233  | 0.349278  | 1.473038  | C  | 2.758877  | 5.944797  | -2.573455 |
| C | 3.854240  | 1.454347  | 0.613040  | H  | 0.891646  | 6.442588  | -1.645800 |
| C | 4.274126  | 0.596911  | 2.800361  | C  | 3.399454  | 3.628511  | -2.511291 |
| C | 4.112493  | 2.743727  | 1.052931  | H  | 2.032092  | 2.295721  | -1.533863 |
| H | 3.587693  | 1.270471  | -0.425752 | C  | 3.669165  | 4.939497  | -2.890430 |
| C | 4.534231  | 1.887067  | 3.267789  | H  | 2.958320  | 6.974549  | -2.865350 |
| H | 4.350931  | -0.221358 | 3.516544  | H  | 4.098163  | 2.828742  | -2.754175 |
| C | 4.457313  | 2.969022  | 2.390314  | H  | 4.583950  | 5.178168  | -3.430117 |
| H | 4.044135  | 3.595456  | 0.377235  | H  | -0.991205 | 0.397061  | -2.052385 |
| H | 4.795383  | 2.031482  | 4.313492  | H  | -0.232356 | 2.296854  | -2.394554 |
| O | 4.679308  | 4.269587  | 2.743905  | Si | 0.065678  | 0.848037  | -3.153554 |
| C | 5.094779  | 4.506759  | 4.070000  | O  | 1.066712  | -0.329062 | -2.452621 |
| H | 6.036267  | 3.986320  | 4.298515  | O  | -1.005037 | 0.461608  | -4.378763 |

|   |           |           |           |
|---|-----------|-----------|-----------|
| O | 1.246520  | 1.563774  | -4.110990 |
| C | 2.314158  | -0.635628 | -3.086281 |
| H | 2.749950  | -1.483385 | -2.561536 |
| H | 2.155975  | -0.879234 | -4.143867 |
| H | 3.004546  | 0.211675  | -3.019266 |
| C | 0.964970  | 2.711076  | -4.872068 |
| H | 1.868157  | 2.976670  | -5.434051 |
| H | 0.145393  | 2.533965  | -5.585983 |
| H | 0.701898  | 3.567710  | -4.230369 |
| C | -2.362229 | 0.125279  | -4.259411 |
| H | -2.983296 | 0.911790  | -4.712936 |
| H | -2.558965 | -0.813051 | -4.795283 |
| H | -2.687817 | -0.002336 | -3.213634 |

**TS6h**

M06L SCF energy in Solvent: -7957.807955 a.u.

PBE0-D3BJ Free energy in Solvent: -7956.549130 a.u.

|   |           |           |          |
|---|-----------|-----------|----------|
| O | -0.055309 | -0.980130 | 0.507227 |
| C | -0.391256 | -1.496126 | 1.727458 |
| C | -1.713899 | -1.936725 | 2.015270 |
| C | -1.962117 | -2.505660 | 3.266115 |
| H | -2.966767 | -2.874460 | 3.469919 |
| C | -0.998363 | -2.645436 | 4.263709 |
| C | 0.280679  | -2.196094 | 3.964348 |
| H | 1.075613  | -2.289441 | 4.707724 |
| C | 0.592957  | -1.625792 | 2.731097 |
| C | -1.339701 | -3.240402 | 5.595393 |
| H | -1.910373 | -2.538628 | 6.219000 |
| H | -0.440113 | -3.515070 | 6.158243 |
| H | -1.958169 | -4.140820 | 5.493793 |
| C | -2.862925 | -1.861227 | 0.976838 |
| O | -2.955842 | -0.587861 | 0.417117 |
| C | -4.243986 | -2.073625 | 1.650965 |
| C | -4.732710 | -1.106798 | 2.598440 |
| C | -5.049656 | -3.147684 | 1.331489 |
| C | -3.993930 | 0.036114  | 3.010820 |
| C | -6.021024 | -1.309790 | 3.196564 |
| C | -6.330261 | -3.323029 | 1.897677 |
| H | -4.694768 | -3.892941 | 0.623585 |
| C | -4.487750 | 0.906651  | 3.956579 |
| H | -3.023636 | 0.225434  | 2.562564 |
| C | -6.498157 | -0.393997 | 4.166738 |
| C | -6.806224 | -2.425348 | 2.816539 |
| H | -6.929617 | -4.183362 | 1.604080 |

|    |           |           |           |
|----|-----------|-----------|-----------|
| C  | -5.749234 | 0.692971  | 4.547975  |
| H  | -3.892408 | 1.769101  | 4.252909  |
| H  | -7.479272 | -0.574697 | 4.607096  |
| H  | -7.787636 | -2.555141 | 3.273362  |
| H  | -6.127206 | 1.387439  | 5.296725  |
| C  | -2.622926 | -2.965347 | -0.088776 |
| C  | -3.108306 | -2.864721 | -1.438998 |
| C  | -1.972298 | -4.128445 | 0.288626  |
| C  | -3.888429 | -1.779977 | -1.935129 |
| C  | -2.833728 | -3.941482 | -2.355368 |
| C  | -1.726958 | -5.187591 | -0.604741 |
| H  | -1.627347 | -4.226819 | 1.316338  |
| C  | -4.336704 | -1.752901 | -3.236849 |
| H  | -4.114940 | -0.957417 | -1.267426 |
| C  | -3.295480 | -3.866903 | -3.693188 |
| C  | -2.134032 | -5.088819 | -1.912010 |
| H  | -1.205114 | -6.077352 | -0.252691 |
| C  | -4.034054 | -2.796435 | -4.133709 |
| H  | -4.929690 | -0.901955 | -3.573140 |
| H  | -3.055424 | -4.692070 | -4.365123 |
| H  | -1.958198 | -5.897500 | -2.622199 |
| H  | -4.386855 | -2.756168 | -5.163357 |
| H  | -0.282018 | -2.898589 | -1.264186 |
| Si | 0.677730  | -3.160537 | -2.325018 |
| O  | 1.891868  | -2.051453 | -1.940359 |
| O  | 1.435722  | -4.614609 | -2.336078 |
| O  | 0.109915  | -2.905091 | -3.843785 |
| C  | 3.014065  | -1.911785 | -2.827321 |
| H  | 2.686715  | -1.468485 | -3.774543 |
| H  | 3.736661  | -1.254800 | -2.334236 |
| H  | 3.462257  | -2.895052 | -3.011352 |
| C  | -0.658709 | -1.738240 | -4.101991 |
| H  | -1.455524 | -1.606716 | -3.353759 |
| H  | -0.027418 | -0.837146 | -4.106756 |
| H  | -1.128558 | -1.856064 | -5.083208 |
| C  | 1.015042  | -5.745846 | -3.073278 |
| H  | 0.437429  | -6.423433 | -2.430132 |
| H  | 0.400152  | -5.465241 | -3.938628 |
| H  | 1.906685  | -6.273307 | -3.428830 |
| Zn | 1.767475  | -0.764971 | -0.244241 |
| O  | 3.444642  | 0.119778  | -0.303220 |
| N  | 2.634072  | -1.904386 | 1.371835  |
| C  | 2.004203  | -1.188390 | 2.499546  |
| H  | 2.060009  | -0.110246 | 2.280413  |

|    |           |           |           |    |           |          |           |
|----|-----------|-----------|-----------|----|-----------|----------|-----------|
| H  | 2.601821  | -1.348880 | 3.415454  | C  | -3.560123 | 2.472365 | -0.367917 |
| C  | 2.482135  | -3.367453 | 1.440509  | O  | -3.288577 | 1.655214 | -1.239091 |
| H  | 2.701423  | -3.711411 | 2.468382  | O  | -4.694651 | 2.461488 | 0.315353  |
| H  | 1.443556  | -3.647334 | 1.219894  | C  | -5.571266 | 1.327064 | 0.045147  |
| C  | 3.498378  | -3.900179 | 0.436005  | H  | -4.984261 | 0.421053 | 0.241033  |
| H  | 3.015552  | -4.125808 | -0.520740 | H  | -5.830642 | 1.350741 | -1.021433 |
| H  | 3.946046  | -4.833905 | 0.792566  | C  | -6.764609 | 1.455811 | 0.946078  |
| C  | 4.530355  | -2.773233 | 0.281231  | H  | -6.455250 | 1.465920 | 1.997015  |
| H  | 4.550827  | -2.389586 | -0.745364 | H  | -7.424746 | 0.592983 | 0.801862  |
| H  | 5.552035  | -3.094186 | 0.506923  | H  | -7.335842 | 2.367597 | 0.738250  |
| C  | 4.084254  | -1.656406 | 1.227368  | C  | -2.637308 | 3.629778 | 0.001091  |
| H  | 4.553082  | -1.799017 | 2.218404  | C  | -1.180905 | 3.068892 | -0.036137 |
| C  | 4.360286  | -0.209632 | 0.693012  | O  | -0.945403 | 1.976235 | 0.592233  |
| C  | 5.779307  | -0.172405 | 0.099362  | O  | -0.297790 | 4.101781 | 0.086162  |
| C  | 6.878646  | -0.692297 | 0.782613  | C  | 1.064482  | 3.696855 | 0.284276  |
| H  | 6.742051  | -1.151292 | 1.762783  | H  | 1.280125  | 2.836727 | -0.368355 |
| C  | 8.163851  | -0.655524 | 0.246944  | H  | 1.185497  | 3.348794 | 1.319280  |
| H  | 8.990064  | -1.081524 | 0.810461  | C  | 1.941998  | 4.872162 | -0.049830 |
| C  | 8.370082  | -0.071485 | -1.005163 | H  | 1.800555  | 5.166019 | -1.095004 |
| C  | 7.282399  | 0.468383  | -1.696530 | H  | 2.997518  | 4.610310 | 0.089132  |
| H  | 7.460277  | 0.927740  | -2.666787 | H  | 1.716212  | 5.733170 | 0.589868  |
| C  | 6.009392  | 0.415902  | -1.147611 | C  | -2.877241 | 4.067037 | 1.453332  |
| H  | 5.163731  | 0.843570  | -1.681857 | H  | -2.124525 | 4.796065 | 1.764840  |
| O  | 9.581085  | 0.021029  | -1.626149 | H  | -2.801159 | 3.201939 | 2.119594  |
| C  | 10.691185 | -0.507906 | -0.939423 | H  | -3.871936 | 4.506500 | 1.565636  |
| H  | 10.851515 | -0.003534 | 0.025163  | C  | -2.833266 | 4.770776 | -0.994194 |
| H  | 10.581123 | -1.587707 | -0.758529 | C  | -2.409808 | 6.065658 | -0.669926 |
| H  | 11.555923 | -0.336743 | -1.583811 | C  | -3.383103 | 4.557214 | -2.263364 |
| C  | 4.329634  | 0.835337  | 1.827468  | C  | -2.526796 | 7.106905 | -1.583416 |
| C  | 3.776614  | 2.094744  | 1.568915  | H  | -1.957251 | 6.257981 | 0.299389  |
| C  | 4.885561  | 0.627934  | 3.090482  | C  | -3.508055 | 5.601957 | -3.176040 |
| C  | 3.757580  | 3.091332  | 2.531941  | H  | -3.710125 | 3.561628 | -2.555628 |
| H  | 3.353881  | 2.267462  | 0.580420  | C  | -3.078159 | 6.881046 | -2.842834 |
| C  | 4.873475  | 1.615728  | 4.075038  | H  | -2.182465 | 8.102480 | -1.307717 |
| H  | 5.349924  | -0.325988 | 3.340283  | H  | -3.938656 | 5.406728 | -4.157045 |
| C  | 4.303443  | 2.858527  | 3.797655  | H  | -3.171805 | 7.697255 | -3.556993 |
| H  | 3.323817  | 4.069564  | 2.330284  | H  | -0.887277 | 0.685664 | -1.836220 |
| H  | 5.311314  | 1.404191  | 5.047226  | H  | -1.023429 | 2.742213 | -1.391421 |
| O  | 4.234428  | 3.895693  | 4.679367  | Si | -0.160761 | 1.958108 | -2.562341 |
| C  | 4.788515  | 3.683313  | 5.957199  | O  | -1.017284 | 1.738304 | -3.967971 |
| H  | 5.863825  | 3.457682  | 5.901452  | O  | 1.248495  | 1.065935 | -2.239826 |
| H  | 4.643204  | 4.614394  | 6.508717  | O  | 0.627191  | 3.397798 | -2.927013 |
| H  | 4.282614  | 2.863430  | 6.488521  | C  | -2.220334 | 1.027996 | -4.120327 |
| Zn | -1.465589 | 0.260808  | -0.308707 | H  | -2.163564 | 0.416428 | -5.031451 |

|   |           |          |           |
|---|-----------|----------|-----------|
| H | -3.058806 | 1.731130 | -4.226762 |
| H | -2.439918 | 0.372366 | -3.266595 |
| C | -0.076684 | 4.542304 | -3.348891 |
| H | -0.591657 | 5.027426 | -2.506185 |
| H | -0.817123 | 4.305024 | -4.125894 |
| H | 0.649991  | 5.251765 | -3.763763 |
| C | 2.512017  | 1.562862 | -2.689526 |
| H | 2.853592  | 2.393150 | -2.058406 |
| H | 2.451894  | 1.913238 | -3.725517 |
| H | 3.232039  | 0.749344 | -2.602843 |

**TS7a'**

M06L SCF energy in Solvent: -6687.266972 a.u.

PBE0-D3BJ Free energy in Solvent: -6686.273264 a.u.

|   |           |           |           |
|---|-----------|-----------|-----------|
| O | -0.421311 | -0.720265 | -0.332875 |
| C | -0.893070 | -1.928655 | -0.704460 |
| C | -2.287935 | -2.143608 | -0.825089 |
| C | -2.706558 | -3.404599 | -1.258368 |
| H | -3.771915 | -3.589384 | -1.382426 |
| C | -1.829573 | -4.447026 | -1.565879 |
| C | -0.466936 | -4.194754 | -1.455589 |
| H | 0.252196  | -4.976913 | -1.710518 |
| C | 0.014025  | -2.958484 | -1.029301 |
| C | -2.349559 | -5.783427 | -2.001829 |
| H | -1.552655 | -6.410565 | -2.418062 |
| H | -3.131384 | -5.687735 | -2.765628 |
| H | -2.796337 | -6.338533 | -1.165806 |
| C | -3.316419 | -0.999786 | -0.602081 |
| O | -3.134130 | -0.297980 | 0.626198  |
| C | -4.723073 | -1.633526 | -0.528113 |
| C | -5.124673 | -2.375832 | 0.631676  |
| C | -5.589681 | -1.562429 | -1.600512 |
| C | -4.268048 | -2.640290 | 1.733986  |
| C | -6.443908 | -2.941052 | 0.671075  |
| C | -6.879870 | -2.126981 | -1.561797 |
| H | -5.276901 | -1.042554 | -2.504014 |
| C | -4.693561 | -3.379810 | 2.812382  |
| H | -3.259439 | -2.242492 | 1.713176  |
| C | -6.856792 | -3.677887 | 1.808758  |
| C | -7.308547 | -2.785668 | -0.438305 |
| H | -7.532435 | -2.027964 | -2.427757 |
| C | -6.004571 | -3.894363 | 2.863077  |
| H | -4.006967 | -3.569665 | 3.636413  |
| H | -7.868558 | -4.084650 | 1.819365  |

|   |           |           |           |
|---|-----------|-----------|-----------|
| H | -8.308401 | -3.217485 | -0.387374 |
| H | -6.332265 | -4.470207 | 3.727189  |
| C | -3.220973 | 0.042021  | -1.740800 |
| C | -4.092182 | 1.186768  | -1.752848 |
| C | -2.292772 | -0.081582 | -2.756315 |
| C | -5.120630 | 1.397498  | -0.795428 |
| C | -3.973193 | 2.141728  | -2.817195 |
| C | -2.136246 | 0.892024  | -3.763070 |
| H | -1.664655 | -0.968096 | -2.794710 |
| C | -6.016075 | 2.434850  | -0.922679 |
| H | -5.189424 | 0.729497  | 0.056829  |
| C | -4.890998 | 3.219205  | -2.898030 |
| C | -2.968003 | 1.986602  | -3.794502 |
| H | -1.370827 | 0.752272  | -4.526185 |
| C | -5.908511 | 3.356145  | -1.984004 |
| H | -6.806527 | 2.553663  | -0.182596 |
| H | -4.781259 | 3.929649  | -3.717983 |
| H | -2.870282 | 2.736608  | -4.580448 |
| H | -6.620369 | 4.175601  | -2.071594 |
| O | 3.151034  | 0.408761  | -0.269984 |
| N | 1.966564  | -1.619380 | -1.788066 |
| C | 1.494002  | -2.735035 | -0.937873 |
| H | 1.792102  | -2.501093 | 0.094427  |
| H | 2.035192  | -3.657915 | -1.215425 |
| C | 1.558330  | -1.735950 | -3.196260 |
| H | 1.856136  | -2.726857 | -3.588015 |
| H | 0.468206  | -1.659330 | -3.282184 |
| C | 2.328445  | -0.613417 | -3.861278 |
| H | 1.778808  | 0.330856  | -3.741546 |
| H | 2.457234  | -0.774980 | -4.936271 |
| C | 3.653513  | -0.564445 | -3.086803 |
| H | 3.915666  | 0.460815  | -2.803960 |
| H | 4.491791  | -0.957825 | -3.671554 |
| C | 3.440400  | -1.413963 | -1.820043 |
| H | 3.918365  | -2.403381 | -1.932967 |
| C | 3.960900  | -0.691236 | -0.529349 |
| C | 5.396019  | -0.215811 | -0.799516 |
| C | 6.377893  | -1.077083 | -1.287950 |
| H | 6.135861  | -2.119355 | -1.499091 |
| C | 7.681376  | -0.646741 | -1.525505 |
| H | 8.415077  | -1.349306 | -1.912242 |
| C | 8.023715  | 0.681327  | -1.261620 |
| C | 7.050602  | 1.556649  | -0.771747 |
| H | 7.333433  | 2.588900  | -0.575580 |



|   |           |           |           |    |           |           |           |
|---|-----------|-----------|-----------|----|-----------|-----------|-----------|
| H | -4.039603 | -2.197129 | 1.587158  | C  | 5.784894  | -2.165183 | -0.950250 |
| C | -7.901463 | -2.538766 | 1.518768  | H  | 5.508615  | -3.215085 | -1.048819 |
| C | -8.039455 | -1.005706 | -0.398910 | C  | 7.116853  | -1.811558 | -1.160695 |
| H | -8.007318 | 0.295876  | -2.097801 | H  | 7.838118  | -2.581200 | -1.423974 |
| C | -7.165894 | -3.242303 | 2.440141  | C  | 7.504100  | -0.477692 | -1.019381 |
| H | -5.176339 | -3.687320 | 3.170680  | C  | 6.548403  | 0.481403  | -0.672602 |
| H | -8.987698 | -2.628990 | 1.488107  | H  | 6.865811  | 1.517085  | -0.568317 |
| H | -9.122699 | -1.129704 | -0.394033 | C  | 5.226832  | 0.112165  | -0.474283 |
| H | -7.661024 | -3.896799 | 3.155985  | H  | 4.479166  | 0.859517  | -0.216252 |
| C | -3.296958 | 0.693177  | -1.303353 | O  | 8.777050  | -0.018637 | -1.196947 |
| C | -3.618736 | 2.052875  | -0.955300 | C  | 9.755433  | -0.970100 | -1.543031 |
| C | -2.633720 | 0.461713  | -2.495010 | H  | 9.865197  | -1.743214 | -0.767772 |
| C | -4.364786 | 2.416623  | 0.201737  | H  | 9.526194  | -1.461870 | -2.500434 |
| C | -3.216149 | 3.110549  | -1.840212 | H  | 10.693881 | -0.419533 | -1.637601 |
| C | -2.226541 | 1.504903  | -3.349249 | C  | 3.221462  | -2.719867 | 0.605543  |
| H | -2.419529 | -0.563208 | -2.791163 | C  | 2.905907  | -2.386713 | 1.929399  |
| C | -4.659683 | 3.732613  | 0.477778  | C  | 3.441147  | -4.068938 | 0.322786  |
| H | -4.706330 | 1.635332  | 0.871478  | C  | 2.799865  | -3.351671 | 2.917614  |
| C | -3.538472 | 4.452955  | -1.521706 | H  | 2.735179  | -1.338355 | 2.165225  |
| C | -2.505995 | 2.807544  | -3.025507 | C  | 3.338354  | -5.057091 | 1.302571  |
| H | -1.691672 | 1.264876  | -4.267670 | H  | 3.679882  | -4.390206 | -0.691281 |
| C | -4.239383 | 4.765874  | -0.383263 | C  | 3.014704  | -4.699184 | 2.611765  |
| H | -5.236155 | 3.974413  | 1.369268  | H  | 2.550814  | -3.086186 | 3.943356  |
| H | -3.212741 | 5.236268  | -2.207198 | H  | 3.507150  | -6.096071 | 1.030916  |
| H | -2.199182 | 3.627121  | -3.675945 | O  | 2.882191  | -5.577128 | 3.645664  |
| H | -4.479461 | 5.802274  | -0.151611 | C  | 3.104655  | -6.938332 | 3.358412  |
| O | 2.642193  | -0.462318 | 0.009438  | H  | 4.125517  | -7.113508 | 2.987709  |
| N | 1.297044  | -1.998125 | -1.913875 | H  | 2.965322  | -7.473286 | 4.300144  |
| C | 0.591318  | -3.078315 | -1.176062 | H  | 2.388783  | -7.319129 | 2.614832  |
| H | 0.909822  | -3.007713 | -0.127879 | Zn | 0.918907  | -0.294723 | -0.750874 |
| H | 0.941642  | -4.054716 | -1.554816 | Zn | -1.633701 | 0.508247  | 1.076493  |
| C | 0.999008  | -1.986669 | -3.355193 | C  | 1.877791  | 4.350116  | -0.303149 |
| H | 1.183302  | -2.995118 | -3.769937 | O  | 2.872085  | 3.799360  | -0.732843 |
| H | -0.058024 | -1.750300 | -3.521663 | O  | 1.593262  | 5.645621  | -0.499057 |
| C | 1.976536  | -0.962370 | -3.907765 | C  | 2.580842  | 6.376976  | -1.258838 |
| H | 1.522053  | 0.037512  | -3.894948 | H  | 2.696146  | 5.891394  | -2.235097 |
| H | 2.243377  | -1.176531 | -4.947544 | H  | 3.543787  | 6.294661  | -0.740855 |
| C | 3.177313  | -1.024805 | -2.946719 | C  | 2.100779  | 7.797272  | -1.369038 |
| H | 3.371345  | -0.043489 | -2.494561 | H  | 1.134748  | 7.848300  | -1.882234 |
| H | 4.106216  | -1.331883 | -3.437182 | H  | 2.820980  | 8.394886  | -1.937701 |
| C | 2.791738  | -2.015807 | -1.839978 | H  | 1.985056  | 8.251622  | -0.379643 |
| H | 3.135581  | -3.033032 | -2.097445 | C  | 0.824709  | 3.666434  | 0.576721  |
| C | 3.333366  | -1.584478 | -0.428541 | C  | 1.011663  | 2.178035  | 0.284579  |
| C | 4.819573  | -1.219614 | -0.608132 | O  | 0.499530  | 1.678949  | -0.751689 |

|   |           |           |           |
|---|-----------|-----------|-----------|
| O | -0.137104 | 1.427818  | 1.746973  |
| C | 0.555939  | 0.876371  | 2.857198  |
| H | 0.497743  | 1.581437  | 3.702500  |
| H | 1.623255  | 0.786611  | 2.587638  |
| C | 0.015257  | -0.483034 | 3.241091  |
| H | -1.050970 | -0.424692 | 3.510328  |
| H | 0.543007  | -0.896277 | 4.109734  |
| H | 0.128615  | -1.197151 | 2.412793  |
| C | -0.580317 | 4.104235  | 0.189103  |
| H | -1.330999 | 3.549481  | 0.765465  |
| H | -0.759588 | 3.898924  | -0.869558 |
| H | -0.725306 | 5.173992  | 0.362815  |
| H | 1.891343  | 1.703067  | 0.750847  |
| C | 1.206434  | 3.953802  | 2.025906  |
| C | 0.280583  | 4.431986  | 2.955020  |
| C | 2.514031  | 3.693844  | 2.453659  |
| C | 0.651648  | 4.640835  | 4.280722  |
| H | -0.744101 | 4.632240  | 2.649453  |
| C | 2.884030  | 3.900208  | 3.779179  |
| H | 3.251979  | 3.327600  | 1.739207  |
| C | 1.953135  | 4.375264  | 4.698500  |
| H | -0.084282 | 5.013695  | 4.991236  |
| H | 3.905459  | 3.689638  | 4.091568  |
| H | 2.240308  | 4.540279  | 5.735530  |

### TS10c

M06L SCF energy in Solvent: -7168.782557 a.u.

PBE0-D3BJ Free energy in Solvent: -7167.715972 a.u.

|   |          |           |           |
|---|----------|-----------|-----------|
| O | 1.133285 | -0.409558 | -0.493556 |
| C | 1.653074 | 0.402113  | -1.458556 |
| C | 3.056961 | 0.633586  | -1.544403 |
| C | 3.556046 | 1.286365  | -2.670189 |
| H | 4.634437 | 1.410937  | -2.756660 |
| C | 2.749821 | 1.813499  | -3.678650 |
| C | 1.378967 | 1.694098  | -3.505631 |
| H | 0.703137 | 2.139057  | -4.240057 |
| C | 0.817824 | 1.019922  | -2.417363 |
| C | 3.345553 | 2.510341  | -4.863393 |
| H | 3.982598 | 1.840164  | -5.455975 |
| H | 3.978263 | 3.355377  | -4.561583 |
| H | 2.570154 | 2.900928  | -5.532559 |
| C | 4.014313 | 0.265790  | -0.385224 |
| O | 3.489627 | 0.771800  | 0.824029  |
| C | 5.380690 | 0.969919  | -0.568079 |

|    |           |           |           |
|----|-----------|-----------|-----------|
| C  | 5.491382  | 2.392497  | -0.401294 |
| C  | 6.515508  | 0.252766  | -0.891331 |
| C  | 4.380278  | 3.248867  | -0.172153 |
| C  | 6.783974  | 3.005774  | -0.517642 |
| C  | 7.781565  | 0.861718  | -1.011796 |
| H  | 6.442300  | -0.821155 | -1.049802 |
| C  | 4.540107  | 4.608566  | -0.039263 |
| H  | 3.391309  | 2.810242  | -0.095339 |
| C  | 6.913135  | 4.407618  | -0.358009 |
| C  | 7.916859  | 2.210606  | -0.812709 |
| H  | 8.647593  | 0.248927  | -1.256556 |
| C  | 5.817111  | 5.199498  | -0.120698 |
| H  | 3.666320  | 5.236248  | 0.131961  |
| H  | 7.908338  | 4.845656  | -0.441466 |
| H  | 8.890295  | 2.695245  | -0.893089 |
| H  | 5.930156  | 6.276586  | -0.005743 |
| C  | 4.212862  | -1.261443 | -0.294610 |
| C  | 4.844881  | -1.858912 | 0.851098  |
| C  | 3.819130  | -2.082784 | -1.333347 |
| C  | 5.341456  | -1.110541 | 1.953463  |
| C  | 5.020954  | -3.283699 | 0.882854  |
| C  | 4.002031  | -3.480147 | -1.299356 |
| H  | 3.349277  | -1.636428 | -2.208597 |
| C  | 5.938549  | -1.732701 | 3.026267  |
| H  | 5.231656  | -0.031364 | 1.938715  |
| C  | 5.631481  | -3.889425 | 2.008654  |
| C  | 4.587750  | -4.071530 | -0.209889 |
| H  | 3.670660  | -4.084694 | -2.143553 |
| C  | 6.079214  | -3.134397 | 3.064757  |
| H  | 6.309638  | -1.130938 | 3.854631  |
| H  | 5.745557  | -4.974089 | 2.011919  |
| H  | 4.722567  | -5.152531 | -0.163617 |
| H  | 6.550169  | -3.612941 | 3.922222  |
| H  | 1.130612  | -3.037475 | -1.925349 |
| Si | 0.406505  | -3.908000 | -1.007550 |
| O  | -0.885715 | -2.950773 | -0.503492 |
| O  | -0.141444 | -5.220019 | -1.824003 |
| O  | 1.206866  | -4.471120 | 0.307909  |
| C  | -1.946903 | -3.564703 | 0.242103  |
| H  | -1.553043 | -4.073762 | 1.130297  |
| H  | -2.628557 | -2.766478 | 0.550969  |
| H  | -2.478049 | -4.279290 | -0.399588 |
| C  | 1.645037  | -3.581600 | 1.328171  |
| H  | 2.331045  | -4.126536 | 1.983054  |

|   |            |           |           |    |           |           |           |
|---|------------|-----------|-----------|----|-----------|-----------|-----------|
| H | 2.190900   | -2.724040 | 0.904186  | H  | -3.129959 | 2.319676  | -2.923553 |
| H | 0.791744   | -3.208805 | 1.909571  | C  | -4.399589 | 4.355486  | -0.535267 |
| C | -0.329432  | -6.500357 | -1.249585 | H  | -5.081434 | 3.723145  | 1.401124  |
| H | -0.465120  | -7.215893 | -2.065985 | H  | -3.664888 | 4.665823  | -2.546800 |
| H | 0.535149   | -6.800886 | -0.646225 | O  | -4.732596 | 5.639616  | -0.218602 |
| H | -1.225083  | -6.524328 | -0.612540 | C  | -4.484057 | 6.619964  | -1.199983 |
| O | -2.665483  | -0.259093 | 0.016884  | H  | -5.060091 | 6.431705  | -2.117752 |
| N | -1.286603  | -0.306402 | -2.336491 | H  | -4.797897 | 7.571224  | -0.765654 |
| C | -0.679669  | 1.033229  | -2.315866 | H  | -3.415672 | 6.672303  | -1.459533 |
| H | -1.018064  | 1.527598  | -1.389201 | Zn | -0.837497 | -0.794915 | -0.251996 |
| H | -1.079403  | 1.630602  | -3.155591 | Zn | 1.904093  | -0.004646 | 1.381669  |
| C | -0.830914  | -1.112675 | -3.479828 | C  | -0.685302 | 1.563792  | 2.144531  |
| H | -0.846986  | -0.487694 | -4.392598 | O  | 0.140757  | 1.435537  | 1.240560  |
| H | 0.209685   | -1.422967 | -3.326535 | O  | -1.491903 | 2.602251  | 2.232938  |
| C | -1.833494  | -2.260802 | -3.576903 | C  | -1.334014 | 3.625664  | 1.202564  |
| H | -1.420173  | -3.200246 | -3.189759 | H  | -1.877695 | 3.274928  | 0.316706  |
| H | -2.104223  | -2.447380 | -4.621880 | H  | -0.270667 | 3.691334  | 0.950883  |
| C | -3.033248  | -1.799359 | -2.741039 | C  | -1.884618 | 4.909331  | 1.754054  |
| H | -3.099098  | -2.364161 | -1.802616 | H  | -2.935941 | 4.803759  | 2.038273  |
| H | -3.992851  | -1.927877 | -3.250545 | H  | -1.823317 | 5.690581  | 0.988348  |
| C | -2.767322  | -0.330749 | -2.403783 | H  | -1.315768 | 5.241156  | 2.629339  |
| H | -3.093195  | 0.305991  | -3.249244 | C  | -0.747306 | 0.610386  | 3.327521  |
| C | -3.442597  | 0.129654  | -1.065482 | C  | -0.393268 | -0.819635 | 2.880442  |
| C | -4.827056  | -0.543382 | -0.983092 | O  | -0.808747 | -1.344922 | 1.830276  |
| C | -5.800522  | -0.321739 | -1.956940 | C  | 0.279443  | 1.138046  | 4.335873  |
| H | -5.581369  | 0.343946  | -2.794721 | H  | -0.081662 | 2.058106  | 4.806743  |
| C | -7.055901  | -0.921074 | -1.888417 | H  | 1.238222  | 1.345454  | 3.852047  |
| H | -7.785722  | -0.727977 | -2.670667 | H  | 0.463264  | 0.393366  | 5.119424  |
| C | -7.364060  | -1.752059 | -0.807031 | C  | -2.143698 | 0.467812  | 3.938531  |
| C | -6.406814  | -1.966601 | 0.187516  | C  | -2.368170 | 0.614942  | 5.309742  |
| H | -6.666247  | -2.606423 | 1.029062  | C  | -3.216790 | 0.112202  | 3.111526  |
| C | -5.156685  | -1.370011 | 0.092733  | C  | -3.643398 | 0.435816  | 5.841977  |
| H | -4.411188  | -1.530737 | 0.869960  | H  | -1.552730 | 0.877843  | 5.979488  |
| O | -8.560079  | -2.384694 | -0.633755 | C  | -4.489432 | -0.057140 | 3.645800  |
| C | -9.541267  | -2.175124 | -1.622579 | H  | -3.049314 | -0.030413 | 2.040425  |
| H | -9.819399  | -1.113819 | -1.702116 | C  | -4.709107 | 0.103696  | 5.012871  |
| H | -9.206465  | -2.527613 | -2.609614 | H  | -3.799000 | 0.559563  | 6.912403  |
| H | -10.413646 | -2.753327 | -1.311398 | H  | -5.315056 | -0.321665 | 2.984042  |
| C | -3.727181  | 1.641921  | -0.963235 | H  | -5.705470 | -0.032790 | 5.429811  |
| C | -4.292491  | 2.079656  | 0.248242  | H  | 1.370358  | -0.661147 | 2.739689  |
| C | -3.536763  | 2.600284  | -1.953225 | H  | -0.167425 | -1.468791 | 3.751001  |
| C | -4.634181  | 3.399880  | 0.462821  |    |           |           |           |
| H | -4.469746  | 1.348880  | 1.035905  |    |           |           |           |
| C | -3.847883  | 3.950915  | -1.748380 |    |           |           |           |

**IM14b**

M06L SCF energy in Solvent: -6533.562064 a.u.



PBE0-D3BJ Free energy in Solvent: -6532.619196 a.u.

|   |           |           |           |   |           |           |           |
|---|-----------|-----------|-----------|---|-----------|-----------|-----------|
| O | -0.537373 | -1.075430 | 0.272649  | H | -1.183433 | -0.198706 | -4.549680 |
| C | -1.165723 | -2.152069 | -0.243078 | C | -3.553547 | 4.244847  | -1.638345 |
| C | -2.563436 | -2.185158 | -0.501118 | H | -4.837187 | 3.909815  | 0.075430  |
| C | -3.109470 | -3.371830 | -0.991984 | H | -2.316225 | 4.244361  | -3.391872 |
| H | -4.179312 | -3.400842 | -1.199943 | H | -1.425351 | 2.275604  | -4.453475 |
| C | -2.351629 | -4.512257 | -1.273773 | H | -3.681132 | 5.326663  | -1.626240 |
| C | -0.972914 | -4.418403 | -1.106507 | O | 2.957881  | 0.124687  | -0.323801 |
| H | -0.335878 | -5.263486 | -1.379703 | N | 1.649000  | -2.102399 | -1.425852 |
| C | -0.375554 | -3.264198 | -0.604120 | C | 1.117378  | -3.158290 | -0.521081 |
| C | -3.001709 | -5.771872 | -1.759824 | H | 1.438267  | -2.909303 | 0.496250  |
| H | -2.276691 | -6.445077 | -2.232562 | H | 1.587458  | -4.121704 | -0.788939 |
| H | -3.794322 | -5.567740 | -2.490419 | C | 1.218336  | -2.272403 | -2.825433 |
| H | -3.471100 | -6.330862 | -0.938368 | H | 1.436778  | -3.303366 | -3.162580 |
| C | -3.419355 | -0.895800 | -0.442030 | H | 0.137156  | -2.115185 | -2.908234 |
| O | -3.203248 | -0.188554 | 0.761040  | C | 2.067293  | -1.256460 | -3.554739 |
| C | -4.923146 | -1.212235 | -0.505958 | H | 1.646587  | -0.250856 | -3.399837 |
| C | -5.560151 | -1.870877 | 0.597912  | H | 2.106693  | -1.429963 | -4.635390 |
| C | -5.685361 | -0.866878 | -1.603676 | C | 3.426884  | -1.380840 | -2.863891 |
| C | -4.859442 | -2.313443 | 1.750741  | H | 3.929362  | -0.413254 | -2.767141 |
| C | -6.969598 | -2.131133 | 0.530645  | H | 4.097296  | -2.038715 | -3.429381 |
| C | -7.072126 | -1.118110 | -1.662036 | C | 3.138751  | -1.982530 | -1.472913 |
| H | -5.208662 | -0.384694 | -2.455055 | H | 3.558473  | -3.000016 | -1.388699 |
| C | -5.511441 | -2.963529 | 2.773454  | C | 3.673413  | -1.068010 | -0.316953 |
| H | -3.795183 | -2.113369 | 1.822421  | C | 5.159460  | -0.766797 | -0.542550 |
| C | -7.608604 | -2.793903 | 1.606673  | C | 6.060293  | -1.693804 | -1.065848 |
| C | -7.703720 | -1.733926 | -0.612874 | H | 5.714750  | -2.677608 | -1.386164 |
| H | -7.632944 | -0.820382 | -2.546692 | C | 7.415915  | -1.399498 | -1.213835 |
| C | -6.898514 | -3.204507 | 2.708408  | H | 8.081610  | -2.148038 | -1.635699 |
| H | -4.947462 | -3.292183 | 3.645159  | C | 7.894762  | -0.148598 | -0.823569 |
| H | -8.681436 | -2.977041 | 1.536402  | C | 7.005143  | 0.792121  | -0.295115 |
| H | -8.774696 | -1.936602 | -0.643758 | H | 7.394521  | 1.763746  | 0.002440  |
| H | -7.402283 | -3.716637 | 3.526880  | C | 5.662238  | 0.482034  | -0.159605 |
| C | -2.984347 | 0.000483  | -1.647837 | H | 4.967096  | 1.214981  | 0.243035  |
| C | -3.224622 | 1.421636  | -1.637016 | O | 9.196507  | 0.248284  | -0.921214 |
| C | -2.283900 | -0.529354 | -2.717411 | C | 10.110732 | -0.688536 | -1.440239 |
| C | -4.042010 | 2.075339  | -0.669704 | H | 10.155285 | -1.598763 | -0.823783 |
| C | -2.622809 | 2.239821  | -2.653636 | H | 9.859917  | -0.973875 | -2.472847 |
| C | -1.734909 | 0.274166  | -3.737222 | H | 11.086448 | -0.198161 | -1.429453 |
| H | -2.134841 | -1.606548 | -2.766996 | C | 3.548116  | -1.786777 | 1.040637  |
| C | -4.194780 | 3.444333  | -0.671204 | C | 2.883506  | -1.170740 | 2.105509  |
| H | -4.539576 | 1.472904  | 0.082481  | C | 4.077109  | -3.059772 | 1.261941  |
| C | -2.794830 | 3.646356  | -2.615579 | C | 2.712130  | -1.811188 | 3.324503  |
| C | -1.873129 | 1.637648  | -3.691249 | H | 2.503759  | -0.160850 | 1.960933  |
|   |           |           |           | C | 3.915379  | -3.721950 | 2.475793  |

|                                               |           |           |           |                                                     |          |           |           |
|-----------------------------------------------|-----------|-----------|-----------|-----------------------------------------------------|----------|-----------|-----------|
| H                                             | 4.631050  | -3.563523 | 0.468904  | PBE0-D3BJ Free energy in Solvent: -7167.715972 a.u. |          |           |           |
| C                                             | 3.219875  | -3.098298 | 3.515981  | O                                                   | 1.133285 | -0.409558 | -0.493556 |
| H                                             | 2.187874  | -1.330400 | 4.147736  | C                                                   | 1.653074 | 0.402113  | -1.458556 |
| H                                             | 4.335579  | -4.716464 | 2.602140  | C                                                   | 3.056961 | 0.633586  | -1.544403 |
| O                                             | 2.997967  | -3.654754 | 4.739990  | C                                                   | 3.556046 | 1.286365  | -2.670189 |
| C                                             | 3.498973  | -4.954672 | 4.951246  | H                                                   | 4.634437 | 1.410937  | -2.756660 |
| H                                             | 4.594379  | -4.988935 | 4.856214  | C                                                   | 2.749821 | 1.813499  | -3.678650 |
| H                                             | 3.216820  | -5.225589 | 5.970671  | C                                                   | 1.378967 | 1.694098  | -3.505631 |
| H                                             | 3.060131  | -5.678202 | 4.248514  | H                                                   | 0.703137 | 2.139057  | -4.240057 |
| Zn                                            | 1.106476  | -0.227721 | -0.518170 | C                                                   | 0.817824 | 1.019922  | -2.417363 |
| Zn                                            | -1.557019 | 0.674409  | 0.596093  | C                                                   | 3.345553 | 2.510341  | -4.863393 |
| C                                             | -0.707778 | 3.317374  | 1.712498  | H                                                   | 3.982598 | 1.840164  | -5.455975 |
| O                                             | -1.394359 | 2.301100  | 1.883815  | H                                                   | 3.978263 | 3.355377  | -4.561583 |
| O                                             | -1.004718 | 4.440957  | 2.338265  | H                                                   | 2.570154 | 2.900928  | -5.532559 |
| C                                             | -2.184222 | 4.423879  | 3.189226  | C                                                   | 4.014313 | 0.265790  | -0.385224 |
| H                                             | -2.021425 | 3.680051  | 3.977006  | O                                                   | 3.489627 | 0.771800  | 0.824029  |
| H                                             | -3.032347 | 4.083938  | 2.585850  | C                                                   | 5.380690 | 0.969919  | -0.568079 |
| C                                             | -2.358926 | 5.818099  | 3.720044  | C                                                   | 5.491382 | 2.392497  | -0.401294 |
| H                                             | -1.490489 | 6.129786  | 4.308749  | C                                                   | 6.515508 | 0.252766  | -0.891331 |
| H                                             | -3.243274 | 5.862729  | 4.363623  | C                                                   | 4.380278 | 3.248867  | -0.172153 |
| H                                             | -2.492267 | 6.534955  | 2.903240  | C                                                   | 6.783974 | 3.005774  | -0.517642 |
| C                                             | 0.555623  | 3.365852  | 0.869984  | C                                                   | 7.781565 | 0.861718  | -1.011796 |
| C                                             | 0.294155  | 2.716246  | -0.527334 | H                                                   | 6.442300 | -0.821155 | -1.049802 |
| O                                             | -0.068262 | 1.377720  | -0.492084 | C                                                   | 4.540107 | 4.608566  | -0.039263 |
| C                                             | 1.578949  | 2.505733  | 1.622290  | H                                                   | 3.391309 | 2.810242  | -0.095339 |
| H                                             | 2.462579  | 2.319509  | 1.000891  | C                                                   | 6.913135 | 4.407618  | -0.358009 |
| H                                             | 1.143079  | 1.528420  | 1.858422  | C                                                   | 7.916859 | 2.210606  | -0.812709 |
| H                                             | 1.890504  | 2.972867  | 2.564021  | H                                                   | 8.647593 | 0.248927  | -1.256556 |
| C                                             | 1.020895  | 4.786102  | 0.601186  | C                                                   | 5.817111 | 5.199498  | -0.120698 |
| C                                             | 2.325727  | 5.205319  | 0.866555  | H                                                   | 3.666320 | 5.236248  | 0.131961  |
| C                                             | 0.144490  | 5.692975  | -0.011621 | H                                                   | 7.908338 | 4.845656  | -0.441466 |
| C                                             | 2.739767  | 6.496851  | 0.545584  | H                                                   | 8.890295 | 2.695245  | -0.893089 |
| H                                             | 3.035913  | 4.522072  | 1.327355  | H                                                   | 5.930156 | 6.276586  | -0.005743 |
| C                                             | 0.554319  | 6.981134  | -0.330789 | C                                                   | 4.212862 | -1.261443 | -0.294610 |
| H                                             | -0.880656 | 5.387279  | -0.229341 | C                                                   | 4.844881 | -1.858912 | 0.851098  |
| C                                             | 1.857081  | 7.389614  | -0.050988 | C                                                   | 3.819130 | -2.082784 | -1.333347 |
| H                                             | 3.761395  | 6.802113  | 0.765260  | C                                                   | 5.341456 | -1.110541 | 1.953463  |
| H                                             | -0.146422 | 7.670050  | -0.799583 | C                                                   | 5.020954 | -3.283699 | 0.882854  |
| H                                             | 2.180685  | 8.398729  | -0.299859 | C                                                   | 4.002031 | -3.480147 | -1.299356 |
| H                                             | -0.482438 | 3.300341  | -1.052388 | H                                                   | 3.349277 | -1.636428 | -2.208597 |
| H                                             | 1.233794  | 2.844202  | -1.090684 | C                                                   | 5.938549 | -1.732701 | 3.026267  |
| <b>TS10d</b>                                  |           |           |           | H                                                   | 5.231656 | -0.031364 | 1.938715  |
| M06L SCF energy in Solvent: -7168.782557 a.u. |           |           |           | C                                                   | 5.631481 | -3.889425 | 2.008654  |
|                                               |           |           |           | C                                                   | 4.587750 | -4.071530 | -0.209889 |

|    |           |           |           |    |            |           |           |
|----|-----------|-----------|-----------|----|------------|-----------|-----------|
| H  | 3.670660  | -4.084694 | -2.143553 | H  | -7.785722  | -0.727977 | -2.670667 |
| C  | 6.079214  | -3.134397 | 3.064757  | C  | -7.364060  | -1.752059 | -0.807031 |
| H  | 6.309638  | -1.130938 | 3.854631  | C  | -6.406814  | -1.966601 | 0.187516  |
| H  | 5.745557  | -4.974089 | 2.011919  | H  | -6.666247  | -2.606423 | 1.029062  |
| H  | 4.722567  | -5.152531 | -0.163617 | C  | -5.156685  | -1.370011 | 0.092733  |
| H  | 6.550169  | -3.612941 | 3.922222  | H  | -4.411188  | -1.530737 | 0.869960  |
| H  | 1.130612  | -3.037475 | -1.925349 | O  | -8.560079  | -2.384694 | -0.633755 |
| Si | 0.406505  | -3.908000 | -1.007550 | C  | -9.541267  | -2.175124 | -1.622579 |
| O  | -0.885715 | -2.950773 | -0.503492 | H  | -9.819399  | -1.113819 | -1.702116 |
| O  | -0.141444 | -5.220019 | -1.824003 | H  | -9.206465  | -2.527613 | -2.609614 |
| O  | 1.206866  | -4.471120 | 0.307909  | H  | -10.413646 | -2.753327 | -1.311398 |
| C  | -1.946903 | -3.564703 | 0.242103  | C  | -3.727181  | 1.641921  | -0.963235 |
| H  | -1.553043 | -4.073762 | 1.130297  | C  | -4.292491  | 2.079656  | 0.248242  |
| H  | -2.628557 | -2.766478 | 0.550969  | C  | -3.536763  | 2.600284  | -1.953225 |
| H  | -2.478049 | -4.279290 | -0.399588 | C  | -4.634181  | 3.399880  | 0.462821  |
| C  | 1.645037  | -3.581600 | 1.328171  | H  | -4.469746  | 1.348880  | 1.035905  |
| H  | 2.331045  | -4.126536 | 1.983054  | C  | -3.847883  | 3.950915  | -1.748380 |
| H  | 2.190900  | -2.724040 | 0.904186  | H  | -3.129959  | 2.319676  | -2.923553 |
| H  | 0.791744  | -3.208805 | 1.909571  | C  | -4.399589  | 4.355486  | -0.535267 |
| C  | -0.329432 | -6.500357 | -1.249585 | H  | -5.081434  | 3.723145  | 1.401124  |
| H  | -0.465120 | -7.215893 | -2.065985 | H  | -3.664888  | 4.665823  | -2.546800 |
| H  | 0.535149  | -6.800886 | -0.646225 | O  | -4.732596  | 5.639616  | -0.218602 |
| H  | -1.225083 | -6.524328 | -0.612540 | C  | -4.484057  | 6.619964  | -1.199983 |
| O  | -2.665483 | -0.259093 | 0.016884  | H  | -5.060091  | 6.431705  | -2.117752 |
| N  | -1.286603 | -0.306402 | -2.336491 | H  | -4.797897  | 7.571224  | -0.765654 |
| C  | -0.679669 | 1.033229  | -2.315866 | H  | -3.415672  | 6.672303  | -1.459533 |
| H  | -1.018064 | 1.527598  | -1.389201 | Zn | -0.837497  | -0.794915 | -0.251996 |
| H  | -1.079403 | 1.630602  | -3.155591 | Zn | 1.904093   | -0.004646 | 1.381669  |
| C  | -0.830914 | -1.112675 | -3.479828 | C  | -0.685302  | 1.563792  | 2.144531  |
| H  | -0.846986 | -0.487694 | -4.392598 | O  | 0.140757   | 1.435537  | 1.240560  |
| H  | 0.209685  | -1.422967 | -3.326535 | O  | -1.491903  | 2.602251  | 2.232938  |
| C  | -1.833494 | -2.260802 | -3.576903 | C  | -1.334014  | 3.625664  | 1.202564  |
| H  | -1.420173 | -3.200246 | -3.189759 | H  | -1.877695  | 3.274928  | 0.316706  |
| H  | -2.104223 | -2.447380 | -4.621880 | H  | -0.270667  | 3.691334  | 0.950883  |
| C  | -3.033248 | -1.799359 | -2.741039 | C  | -1.884618  | 4.909331  | 1.754054  |
| H  | -3.099098 | -2.364161 | -1.802616 | H  | -2.935941  | 4.803759  | 2.038273  |
| H  | -3.992851 | -1.927877 | -3.250545 | H  | -1.823317  | 5.690581  | 0.988348  |
| C  | -2.767322 | -0.330749 | -2.403783 | H  | -1.315768  | 5.241156  | 2.629339  |
| H  | -3.093195 | 0.305991  | -3.249244 | C  | -0.747306  | 0.610386  | 3.327521  |
| C  | -3.442597 | 0.129654  | -1.065482 | C  | -0.393268  | -0.819635 | 2.880442  |
| C  | -4.827056 | -0.543382 | -0.983092 | O  | -0.808747  | -1.344922 | 1.830276  |
| C  | -5.800522 | -0.321739 | -1.956940 | C  | 0.279443   | 1.138046  | 4.335873  |
| H  | -5.581369 | 0.343946  | -2.794721 | H  | -0.081662  | 2.058106  | 4.806743  |
| C  | -7.055901 | -0.921074 | -1.888417 | H  | 1.238222   | 1.345454  | 3.852047  |

|   |           |           |          |
|---|-----------|-----------|----------|
| H | 0.463264  | 0.393366  | 5.119424 |
| C | -2.143698 | 0.467812  | 3.938531 |
| C | -2.368170 | 0.614942  | 5.309742 |
| C | -3.216790 | 0.112202  | 3.111526 |
| C | -3.643398 | 0.435816  | 5.841977 |
| H | -1.552730 | 0.877843  | 5.979488 |
| C | -4.489432 | -0.057140 | 3.645800 |
| H | -3.049314 | -0.030413 | 2.040425 |
| C | -4.709107 | 0.103696  | 5.012871 |
| H | -3.799000 | 0.559563  | 6.912403 |
| H | -5.315056 | -0.321665 | 2.984042 |
| H | -5.705470 | -0.032790 | 5.429811 |
| H | 1.370358  | -0.661147 | 2.739689 |
| H | -0.167425 | -1.468791 | 3.751001 |

**TS10e**

M06L SCF energy in Solvent: -7168.780218 a.u.

PBE0-D3BJ Free energy in Solvent: -7167.715972 a.u.

|   |          |           |           |
|---|----------|-----------|-----------|
| O | 0.860068 | -0.599386 | -0.549052 |
| C | 1.303777 | -0.002981 | -1.689178 |
| C | 2.697570 | 0.176640  | -1.923927 |
| C | 3.114690 | 0.579509  | -3.191336 |
| H | 4.184835 | 0.665491  | -3.376775 |
| C | 2.236637 | 0.910420  | -4.223281 |
| C | 0.882959 | 0.874886  | -3.922605 |
| H | 0.157327 | 1.195112  | -4.674524 |
| C | 0.401068 | 0.449524  | -2.681307 |
| C | 2.741528 | 1.326841  | -5.570782 |
| H | 1.931180 | 1.704826  | -6.205124 |
| H | 3.213205 | 0.492860  | -6.108490 |
| H | 3.499526 | 2.116932  | -5.494244 |
| C | 3.729169 | 0.039604  | -0.779714 |
| O | 3.276095 | 0.776204  | 0.334513  |
| C | 5.077309 | 0.683186  | -1.187869 |
| C | 5.193932 | 2.109160  | -1.317073 |
| C | 6.190296 | -0.094753 | -1.438933 |
| C | 4.098118 | 3.005108  | -1.186926 |
| C | 6.472538 | 2.673024  | -1.645217 |
| C | 7.443028 | 0.464438  | -1.763961 |
| H | 6.110441 | -1.177771 | -1.377590 |
| C | 4.260500 | 4.361950  | -1.346681 |
| H | 3.120256 | 2.598649  | -0.951030 |
| C | 6.605988 | 4.076712  | -1.783670 |
| C | 7.586341 | 1.824212  | -1.850832 |

|    |           |           |           |
|----|-----------|-----------|-----------|
| H  | 8.292354  | -0.194379 | -1.938344 |
| C  | 5.525691  | 4.910899  | -1.636794 |
| H  | 3.398076  | 5.020262  | -1.247667 |
| H  | 7.590904  | 4.479239  | -2.023232 |
| H  | 8.549808  | 2.274081  | -2.092732 |
| H  | 5.641363  | 5.987660  | -1.752620 |
| C  | 3.953521  | -1.441137 | -0.408098 |
| C  | 4.647869  | -1.805425 | 0.798142  |
| C  | 3.541647  | -2.446515 | -1.260917 |
| C  | 5.175284  | -0.858912 | 1.718979  |
| C  | 4.862871  | -3.197271 | 1.081493  |
| C  | 3.762701  | -3.810341 | -0.981174 |
| H  | 3.030428  | -2.175249 | -2.183337 |
| C  | 5.834368  | -1.262820 | 2.857689  |
| H  | 5.036834  | 0.197622  | 1.514490  |
| C  | 5.536839  | -3.574653 | 2.269344  |
| C  | 4.407731  | -4.180331 | 0.170831  |
| H  | 3.412714  | -4.565161 | -1.685293 |
| C  | 6.011112  | -2.630404 | 3.146600  |
| H  | 6.226825  | -0.512783 | 3.542614  |
| H  | 5.679879  | -4.638119 | 2.465225  |
| H  | 4.576947  | -5.231634 | 0.406010  |
| H  | 6.531445  | -2.934280 | 4.053778  |
| H  | 0.819354  | -3.357174 | -1.636489 |
| Si | 0.132694  | -4.098249 | -0.584989 |
| O  | -1.136924 | -3.082511 | -0.132668 |
| O  | -0.459569 | -5.489190 | -1.216649 |
| O  | 0.987360  | -4.507067 | 0.751639  |
| C  | -2.140492 | -3.611743 | 0.743461  |
| H  | -1.684177 | -4.037630 | 1.645856  |
| H  | -2.799101 | -2.783889 | 1.025816  |
| H  | -2.720155 | -4.380189 | 0.215828  |
| C  | 1.501858  | -3.511734 | 1.630136  |
| H  | 2.236997  | -3.986400 | 2.286125  |
| H  | 2.011996  | -2.708817 | 1.073630  |
| H  | 0.694016  | -3.072496 | 2.228580  |
| C  | -0.655469 | -6.697009 | -0.505918 |
| H  | -0.533844 | -7.527647 | -1.208455 |
| H  | 0.066448  | -6.810594 | 0.311543  |
| H  | -1.671791 | -6.739442 | -0.090337 |
| O  | -2.820797 | -0.176790 | 0.271208  |
| N  | -1.748073 | -0.715615 | -2.187110 |
| C  | -1.080335 | 0.567142  | -2.459784 |
| H  | -1.310767 | 1.237382  | -1.614682 |



|    |           |           |           |   |           |           |           |
|----|-----------|-----------|-----------|---|-----------|-----------|-----------|
| C  | 0.742976  | 2.390734  | -1.641680 | O | 1.054355  | -1.857229 | -3.584989 |
| C  | 3.378626  | 4.602835  | -3.289276 | O | 0.251940  | -4.189755 | -2.345352 |
| H  | 2.652786  | 5.360859  | -3.605950 | C | -2.151942 | -2.828638 | -1.608896 |
| H  | 3.843634  | 4.200426  | -4.200143 | H | -1.817466 | -3.635484 | -0.950918 |
| H  | 4.173545  | 5.114732  | -2.732570 | H | -2.884603 | -2.211967 | -1.077077 |
| C  | 3.841344  | 0.706668  | -0.077173 | H | -2.597379 | -3.250021 | -2.518155 |
| O  | 3.310384  | 0.700394  | 1.230678  | C | 1.316270  | -5.116737 | -2.295844 |
| C  | 5.263960  | 1.301468  | 0.061876  | H | 1.915017  | -5.087548 | -3.218358 |
| C  | 5.465962  | 2.540217  | 0.763525  | H | 1.987488  | -4.923687 | -1.444341 |
| C  | 6.366103  | 0.653316  | -0.459979 | H | 0.887815  | -6.118816 | -2.186615 |
| C  | 4.409155  | 3.323299  | 1.300823  | C | 0.488480  | -2.135772 | -4.850031 |
| C  | 6.801042  | 3.047679  | 0.904704  | H | 0.383022  | -1.195977 | -5.404793 |
| C  | 7.676105  | 1.153554  | -0.310736 | H | 1.151343  | -2.805008 | -5.414797 |
| H  | 6.234680  | -0.277813 | -1.005976 | H | -0.502231 | -2.609343 | -4.779998 |
| C  | 4.655739  | 4.517161  | 1.938685  | O | -2.799348 | 0.065471  | 0.010224  |
| H  | 3.392372  | 2.957436  | 1.213000  | N | -1.432201 | 1.243738  | -2.069682 |
| C  | 7.018458  | 4.275948  | 1.575857  | C | -0.744951 | 2.409319  | -1.483286 |
| C  | 7.891701  | 2.326363  | 0.362404  | H | -1.016504 | 2.442870  | -0.417077 |
| H  | 8.510225  | 0.597950  | -0.736730 | H | -1.145837 | 3.332434  | -1.941569 |
| C  | 5.970435  | 5.001915  | 2.085108  | C | -1.062321 | 1.026855  | -3.482406 |
| H  | 3.821274  | 5.092280  | 2.337652  | H | -0.960290 | 2.007153  | -3.982106 |
| H  | 8.043528  | 4.635598  | 1.672052  | H | -0.084016 | 0.532247  | -3.538725 |
| H  | 8.897820  | 2.728263  | 0.485461  | C | -2.210408 | 0.216171  | -4.084741 |
| H  | 6.151209  | 5.947093  | 2.595240  | H | -1.907975 | -0.815013 | -4.294244 |
| C  | 3.936230  | -0.713251 | -0.693709 | H | -2.529617 | 0.655145  | -5.036967 |
| C  | 4.224326  | -1.881541 | 0.093320  | C | -3.323961 | 0.258246  | -3.035555 |
| C  | 3.816206  | -0.858689 | -2.063597 | H | -3.393349 | -0.696420 | -2.500052 |
| C  | 4.508401  | -1.853256 | 1.488973  | H | -4.314447 | 0.454208  | -3.457722 |
| C  | 4.283747  | -3.161524 | -0.560756 | C | -2.912231 | 1.339353  | -2.040213 |
| C  | 3.958847  | -2.102614 | -2.707980 | H | -3.213613 | 2.331125  | -2.426946 |
| H  | 3.604796  | 0.020454  | -2.669412 | C | -3.495619 | 1.101328  | -0.603897 |
| C  | 4.738161  | -3.010705 | 2.198377  | C | -4.971169 | 0.699239  | -0.780051 |
| H  | 4.546302  | -0.891397 | 1.988280  | C | -5.921684 | 1.610831  | -1.237560 |
| C  | 4.507050  | -4.333036 | 0.205774  | H | -5.627121 | 2.644135  | -1.428589 |
| C  | 4.167646  | -3.238443 | -1.968770 | C | -7.249620 | 1.244092  | -1.445386 |
| H  | 3.874424  | -2.154687 | -3.791706 | H | -7.959037 | 1.985922  | -1.803118 |
| C  | 4.715394  | -4.267538 | 1.562197  | C | -7.651561 | -0.067127 | -1.177692 |
| H  | 4.954602  | -2.949314 | 3.263801  | C | -6.712950 | -0.989873 | -0.708122 |
| H  | 4.535104  | -5.291859 | -0.315695 | H | -7.042809 | -2.006175 | -0.498862 |
| H  | 4.269559  | -4.212741 | -2.448600 | C | -5.392969 | -0.606717 | -0.517712 |
| H  | 4.890438  | -5.176463 | 2.136536  | H | -4.661381 | -1.324792 | -0.151479 |
| H  | 1.408878  | -2.203199 | -1.130077 | O | -8.923459 | -0.534131 | -1.335407 |
| Si | 0.493483  | -2.560254 | -2.208225 | C | -9.889919 | 0.387744  | -1.783223 |
| O  | -1.061099 | -1.969122 | -1.980537 | H | -9.996869 | 1.233861  | -1.088520 |

|    |            |           |           |
|----|------------|-----------|-----------|
| H  | -9.647169  | 0.779923  | -2.782084 |
| H  | -10.832675 | -0.161290 | -1.831377 |
| C  | -3.488840  | 2.347716  | 0.299267  |
| C  | -3.655444  | 2.134622  | 1.676196  |
| C  | -3.424617  | 3.669901  | -0.133691 |
| C  | -3.710789  | 3.181592  | 2.577552  |
| H  | -3.757393  | 1.108879  | 2.030390  |
| C  | -3.472855  | 4.744601  | 0.758042  |
| H  | -3.318140  | 3.899296  | -1.193520 |
| C  | -3.609677  | 4.502475  | 2.123728  |
| H  | -3.841684  | 3.007173  | 3.644027  |
| H  | -3.400969  | 5.758828  | 0.373585  |
| O  | -3.666046  | 5.468793  | 3.082697  |
| C  | -3.572847  | 6.805034  | 2.645358  |
| H  | -4.393998  | 7.065979  | 1.961428  |
| H  | -3.639422  | 7.423148  | 3.542888  |
| H  | -2.615703  | 7.000293  | 2.139663  |
| Zn | -0.994671  | -0.250941 | -0.543683 |
| Zn | 1.736822   | -0.276669 | 1.349995  |
| C  | -1.049226  | -0.023280 | 2.788751  |
| O  | -0.187237  | 0.656844  | 2.253575  |
| C  | -0.911475  | -1.508398 | 3.091475  |
| C  | -0.269640  | -2.206262 | 1.870762  |
| O  | -0.661951  | -1.950749 | 0.699888  |
| O  | 0.100955   | -3.468817 | 2.205424  |
| C  | 0.795399   | -4.178027 | 1.172827  |
| H  | 1.673908   | -3.570735 | 0.883787  |
| H  | 0.145420   | -4.268957 | 0.291099  |
| C  | 1.199568   | -5.517141 | 1.725069  |
| H  | 1.847677   | -5.398086 | 2.599801  |
| H  | 1.754185   | -6.083061 | 0.967963  |
| H  | 0.322763   | -6.103403 | 2.020386  |
| C  | -0.010597  | -1.586825 | 4.332554  |
| H  | -0.515130  | -1.166923 | 5.210002  |
| H  | 0.920919   | -1.036936 | 4.165769  |
| H  | 0.249620   | -2.627065 | 4.543602  |
| C  | -2.279116  | -2.139412 | 3.319708  |
| C  | -2.491648  | -3.091286 | 4.321474  |
| C  | -3.349598  | -1.780171 | 2.491970  |
| C  | -3.748672  | -3.659749 | 4.503681  |
| H  | -1.673975  | -3.400192 | 4.969325  |
| C  | -4.609420  | -2.342698 | 2.685066  |
| H  | -3.198648  | -1.062911 | 1.679430  |
| C  | -4.814134  | -3.283212 | 3.690529  |

|   |           |           |          |
|---|-----------|-----------|----------|
| H | -3.894346 | -4.398747 | 5.289884 |
| H | -5.435060 | -2.034258 | 2.044022 |
| H | -5.799173 | -3.722009 | 3.840178 |
| H | 1.191361  | -1.627104 | 2.013166 |
| H | -1.978469 | 0.466585  | 3.148469 |

### TS10g

M06L SCF energy in Solvent: -7168.771134 a.u.

PBE0-D3BJ Free energy in Solvent: -7167.703089 a.u.

|   |          |           |           |
|---|----------|-----------|-----------|
| O | 0.697839 | 0.354600  | -0.610901 |
| C | 1.162941 | 1.470087  | -1.229895 |
| C | 2.554883 | 1.739226  | -1.316902 |
| C | 2.972374 | 2.814645  | -2.098316 |
| H | 4.042847 | 2.995592  | -2.196338 |
| C | 2.089264 | 3.684491  | -2.742397 |
| C | 0.731044 | 3.461905  | -2.551706 |
| H | 0.003874 | 4.151314  | -2.987671 |
| C | 0.256095 | 2.387350  | -1.797987 |
| C | 2.596574 | 4.831572  | -3.562281 |
| H | 3.250471 | 5.490268  | -2.975720 |
| H | 1.773990 | 5.443749  | -3.949812 |
| H | 3.187286 | 4.492553  | -4.423896 |
| C | 3.568823 | 0.897049  | -0.509739 |
| O | 3.156938 | 0.865615  | 0.839548  |
| C | 4.971539 | 1.552395  | -0.491408 |
| C | 5.181883 | 2.796567  | 0.198538  |
| C | 6.051925 | 0.949950  | -1.105728 |
| C | 4.143828 | 3.535476  | 0.826923  |
| C | 6.503142 | 3.356687  | 0.231063  |
| C | 7.349536 | 1.499841  | -1.059525 |
| H | 5.912755 | 0.015530  | -1.644153 |
| C | 4.394486 | 4.738198  | 1.446671  |
| H | 3.138534 | 3.129763  | 0.823664  |
| C | 6.726349 | 4.592491  | 0.886641  |
| C | 7.573368 | 2.679141  | -0.400223 |
| H | 8.167516 | 0.977335  | -1.553014 |
| C | 5.696225 | 5.275742  | 1.484300  |
| H | 3.574131 | 5.278012  | 1.917515  |
| H | 7.740996 | 4.992210  | 0.900023  |
| H | 8.570255 | 3.118717  | -0.355036 |
| H | 5.880992 | 6.227065  | 1.981442  |
| C | 3.668352 | -0.515675 | -1.141934 |
| C | 4.067980 | -1.676121 | -0.393304 |
| C | 3.446551 | -0.656510 | -2.499944 |

|    |           |           |           |    |            |           |           |
|----|-----------|-----------|-----------|----|------------|-----------|-----------|
| C  | 4.450305  | -1.648109 | 0.979209  | H  | -4.738950  | 0.028388  | -3.236018 |
| C  | 4.139983  | -2.945993 | -1.066693 | C  | -3.324525  | 1.028702  | -1.913702 |
| C  | 3.589132  | -1.887276 | -3.167573 | H  | -3.733260  | 1.984164  | -2.291757 |
| H  | 3.157402  | 0.219559  | -3.077569 | C  | -3.775246  | 0.779355  | -0.432227 |
| C  | 4.790674  | -2.798931 | 1.654341  | C  | -5.221491  | 0.252985  | -0.479706 |
| H  | 4.472088  | -0.690496 | 1.487516  | C  | -6.253877  | 1.011629  | -1.030818 |
| C  | 4.485030  | -4.110456 | -0.335629 | H  | -6.044596  | 2.015016  | -1.406852 |
| C  | 3.910342  | -3.018198 | -2.461009 | C  | -7.557411  | 0.527596  | -1.112487 |
| H  | 3.409053  | -1.936498 | -4.239524 | H  | -8.333226  | 1.148198  | -1.553981 |
| C  | 4.792091  | -4.047628 | 1.002327  | C  | -7.850578  | -0.744836 | -0.615057 |
| H  | 5.074543  | -2.738122 | 2.703748  | C  | -6.831434  | -1.508901 | -0.041581 |
| H  | 4.525943  | -5.060997 | -0.871294 | H  | -7.079325  | -2.493919 | 0.349447  |
| H  | 4.014046  | -3.983558 | -2.958561 | C  | -5.536995  | -1.012275 | 0.019597  |
| H  | 5.057727  | -4.951138 | 1.549783  | H  | -4.741116  | -1.604982 | 0.466172  |
| H  | 1.262144  | -2.168294 | -1.410192 | O  | -9.088404  | -1.318877 | -0.641796 |
| Si | 0.253028  | -2.686565 | -2.324766 | C  | -10.127020 | -0.564108 | -1.220602 |
| O  | -1.296581 | -2.151239 | -1.964168 | H  | -10.293317 | 0.380829  | -0.682166 |
| O  | 0.616609  | -2.106322 | -3.821718 | H  | -9.923493  | -0.335928 | -2.277627 |
| O  | 0.093259  | -4.332390 | -2.284976 | H  | -11.025371 | -1.181067 | -1.152328 |
| C  | -2.305168 | -3.038795 | -1.454105 | C  | -3.806350  | 2.060152  | 0.422644  |
| H  | -1.865637 | -3.823870 | -0.832489 | C  | -3.739799  | 1.903491  | 1.813693  |
| H  | -2.994742 | -2.437403 | -0.851088 | C  | -3.980658  | 3.355154  | -0.061434 |
| H  | -2.839204 | -3.494193 | -2.297215 | C  | -3.796315  | 2.982518  | 2.677031  |
| C  | 1.202630  | -5.198811 | -2.400894 | H  | -3.649246  | 0.890507  | 2.203114  |
| H  | 1.658174  | -5.136161 | -3.400439 | C  | -4.037318  | 4.461394  | 0.789249  |
| H  | 1.976928  | -4.970599 | -1.652049 | H  | -4.061436  | 3.540387  | -1.132243 |
| H  | 0.849674  | -6.222922 | -2.240751 | C  | -3.935983  | 4.278947  | 2.167590  |
| C  | -0.080905 | -2.520265 | -4.978646 | H  | -3.741364  | 2.851932  | 3.756458  |
| H  | -0.321700 | -1.638090 | -5.583638 | H  | -4.155804  | 5.454419  | 0.363465  |
| H  | 0.552879  | -3.190681 | -5.574512 | O  | -3.970549  | 5.282297  | 3.088888  |
| H  | -1.019081 | -3.047388 | -4.747861 | C  | -4.107333  | 6.594664  | 2.594494  |
| O  | -2.948696 | -0.169529 | 0.161453  | H  | -5.049834  | 6.723737  | 2.041927  |
| N  | -1.847541 | 1.062833  | -2.055104 | H  | -4.108291  | 7.249236  | 3.468420  |
| C  | -1.215246 | 2.289948  | -1.531069 | H  | -3.270595  | 6.868204  | 1.935011  |
| H  | -1.409134 | 2.317526  | -0.447605 | Zn | -1.188258  | -0.368326 | -0.579121 |
| H  | -1.724511 | 3.170535  | -1.965174 | Zn | 1.634923   | -0.166280 | 1.112710  |
| C  | -1.573480 | 0.858915  | -3.489476 | C  | -1.007163  | 0.058921  | 2.754669  |
| H  | -1.630456 | 1.833572  | -4.007420 | O  | -0.248320  | 0.741667  | 2.085490  |
| H  | -0.551535 | 0.481931  | -3.620515 | C  | -0.964447  | -1.444520 | 2.948791  |
| C  | -2.663205 | -0.094476 | -3.976936 | C  | -0.196898  | -2.142354 | 1.815223  |
| H  | -2.265595 | -1.101153 | -4.137625 | O  | -0.550507  | -1.972549 | 0.614537  |
| H  | -3.073676 | 0.248262  | -4.933437 | O  | 0.249296   | -3.358595 | 2.209555  |
| C  | -3.717485 | -0.099805 | -2.865000 | C  | 1.021327   | -4.051592 | 1.217568  |
| H  | -3.701904 | -1.047049 | -2.312203 | H  | 1.829644   | -3.372166 | 0.887489  |



|   |           |           |          |   |          |           |           |
|---|-----------|-----------|----------|---|----------|-----------|-----------|
| H | 0.387835  | -4.267687 | 0.345996 | C | 4.030957 | 3.736064  | 0.305786  |
| C | 1.566829  | -5.300589 | 1.852841 | C | 6.423060 | 3.604580  | -0.159718 |
| H | 2.198642  | -5.054927 | 2.713145 | C | 7.453789 | 1.563627  | -0.935363 |
| H | 2.177053  | -5.851439 | 1.128326 | H | 6.148013 | -0.119381 | -1.199392 |
| H | 0.758444  | -5.956521 | 2.194334 | C | 4.168197 | 5.068259  | 0.621355  |
| C | -2.420772 | -1.931593 | 2.857704 | H | 3.058855 | 3.260550  | 0.375565  |
| H | -2.464641 | -3.024958 | 2.898866 | C | 6.529125 | 4.975006  | 0.183457  |
| H | -2.865473 | -1.593015 | 1.914714 | C | 7.565939 | 2.879901  | -0.574401 |
| H | -3.010150 | -1.530860 | 3.691445 | H | 8.328378 | 1.001664  | -1.259497 |
| C | -0.338308 | -1.674069 | 4.322446 | C | 5.426642 | 5.699428  | 0.564233  |
| C | -0.841271 | -2.635576 | 5.204067 | H | 3.291349 | 5.640413  | 0.921272  |
| C | 0.777009  | -0.925167 | 4.718316 | H | 7.511928 | 5.444687  | 0.129081  |
| C | -0.233792 | -2.856263 | 6.435471 | H | 8.527813 | 3.392607  | -0.606705 |
| H | -1.707848 | -3.230738 | 4.924542 | H | 5.521745 | 6.754059  | 0.819410  |
| C | 1.382221  | -1.142395 | 5.952562 | C | 3.908369 | -0.676950 | -0.697089 |
| H | 1.184736  | -0.162817 | 4.056173 | C | 4.341436 | -1.618091 | 0.300564  |
| C | 0.879746  | -2.110440 | 6.815254 | C | 3.747031 | -1.125056 | -1.994851 |
| H | -0.636585 | -3.615428 | 7.103817 | C | 4.668384 | -1.265353 | 1.641502  |
| H | 2.247502  | -0.547313 | 6.237756 | C | 4.501376 | -2.998445 | -0.071923 |
| H | 1.349030  | -2.280567 | 7.782512 | C | 3.985899 | -2.460833 | -2.370190 |
| H | 1.229274  | -1.436840 | 2.010763 | H | 3.422187 | -0.420753 | -2.758165 |
| H | -1.805956 | 0.561396  | 3.339964 | C | 5.032594 | -2.219264 | 2.565186  |

### TSa

M06L SCF energy in Solvent: -7173.942687 a.u.

PBE0-D3BJ Free energy in Solvent: -7172.838421 a.u.

|   |          |          |           |    |           |           |           |
|---|----------|----------|-----------|----|-----------|-----------|-----------|
| O | 0.822607 | 0.158905 | -0.430254 | C  | 4.863928  | -3.953867 | 0.910249  |
| C | 1.282507 | 1.104579 | -1.290988 | C  | 4.337277  | -3.387135 | -1.422820 |
| C | 2.668632 | 1.403616 | -1.400798 | H  | 3.858306  | -2.753500 | -3.410979 |
| C | 3.080143 | 2.271536 | -2.411007 | C  | 5.110616  | -3.580264 | 2.209360  |
| H | 4.147439 | 2.466583 | -2.515608 | H  | 5.273100  | -1.913599 | 3.582367  |
| C | 2.198262 | 2.920450 | -3.276956 | H  | 4.965589  | -4.996385 | 0.602193  |
| C | 0.842297 | 2.693745 | -3.078942 | H  | 4.515875  | -4.429188 | -1.691649 |
| H | 0.110490 | 3.221463 | -3.695773 | H  | 5.390823  | -4.325996 | 2.952495  |
| C | 0.372675 | 1.816264 | -2.100422 | H  | 1.574487  | -2.414172 | -0.612456 |
| C | 2.700241 | 3.842473 | -4.346159 | Si | 0.629277  | -3.095375 | -1.489805 |
| H | 3.389782 | 4.595126 | -3.942636 | O  | -0.957847 | -2.607448 | -1.252620 |
| H | 1.877179 | 4.375653 | -4.836125 | O  | 1.037596  | -2.707508 | -3.034629 |
| H | 3.250158 | 3.303257 | -5.129813 | O  | 0.543735  | -4.729103 | -1.240070 |
| C | 3.694323 | 0.830115 | -0.392595 | C  | -1.921523 | -3.466535 | -0.627399 |
| O | 3.229194 | 1.064571 | 0.916346  | H  | -1.473073 | -4.038825 | 0.190819  |
| C | 5.051493 | 1.569966 | -0.478507 | H  | -2.717204 | -2.828376 | -0.225669 |
| C | 5.145858 | 2.953331 | -0.096604 | H  | -2.332614 | -4.154513 | -1.376328 |
| C | 6.198502 | 0.922365 | -0.892546 | C  | 1.696720  | -5.533017 | -1.109564 |
|   |          |          |           | H  | 2.238671  | -5.616840 | -2.063742 |
|   |          |          |           | H  | 2.390811  | -5.130822 | -0.354726 |
|   |          |          |           | H  | 1.378398  | -6.533591 | -0.797677 |

|   |            |           |           |    |           |           |           |
|---|------------|-----------|-----------|----|-----------|-----------|-----------|
| C | 0.543991   | -3.415064 | -4.153177 | H  | -4.468783 | 3.580088  | 2.731494  |
| H | -0.300938  | -4.074444 | -3.903861 | H  | -4.484978 | 5.084945  | -1.287853 |
| H | 0.211082   | -2.696106 | -4.911193 | O  | -4.787905 | 5.681210  | 1.370771  |
| H | 1.346129   | -4.031388 | -4.581703 | C  | -4.967927 | 6.778673  | 0.505121  |
| O | -2.862450  | -0.226710 | 0.263272  | H  | -5.806143 | 6.615906  | -0.188371 |
| N | -1.652211  | 0.363560  | -2.137112 | H  | -5.190089 | 7.635746  | 1.144064  |
| C | -1.107145  | 1.711237  | -1.893345 | H  | -4.060537 | 6.987240  | -0.080743 |
| H | -1.376752  | 1.988068  | -0.860481 | Zn | -1.052696 | -0.573307 | -0.239389 |
| H | -1.618825  | 2.435398  | -2.554795 | Zn | 1.774064  | -0.010918 | 1.359694  |
| C | -1.264344  | -0.173819 | -3.454201 | C  | -0.699422 | 0.394109  | 3.127215  |
| H | -1.303876  | 0.640981  | -4.200265 | O  | -0.045814 | 0.933634  | 2.234446  |
| H | -0.229092  | -0.534319 | -3.421911 | O  | -1.555046 | 1.073790  | 3.874468  |
| C | -2.296335  | -1.258819 | -3.767647 | C  | -1.595238 | 2.512147  | 3.661276  |
| H | -1.863182  | -2.260755 | -3.687378 | H  | -1.921319 | 2.696599  | 2.632708  |
| H | -2.669110  | -1.149379 | -4.792778 | H  | -0.573617 | 2.894824  | 3.766159  |
| C | -3.406884  | -1.062825 | -2.731434 | C  | -2.539386 | 3.074837  | 4.684842  |
| H | -3.357002  | -1.831238 | -1.951757 | H  | -3.531879 | 2.619923  | 4.593451  |
| H | -4.414433  | -1.110456 | -3.155841 | H  | -2.645287 | 4.154946  | 4.539767  |
| C | -3.128454  | 0.294737  | -2.095223 | H  | -2.176475 | 2.898102  | 5.702986  |
| H | -3.539307  | 1.086177  | -2.749613 | C  | -0.522506 | -1.036175 | 3.609405  |
| C | -3.685147  | 0.437562  | -0.638141 | C  | 0.035406  | -1.899893 | 2.469961  |
| C | -5.087340  | -0.202368 | -0.627613 | O  | -0.460264 | -1.890036 | 1.310410  |
| C | -6.123758  | 0.317606  | -1.402170 | O  | 0.500797  | -3.066921 | 2.991492  |
| H | -5.952653  | 1.219417  | -1.993190 | C  | 1.160184  | -3.929178 | 2.059221  |
| C | -7.382098  | -0.277845 | -1.440611 | H  | 1.934119  | -3.334274 | 1.539482  |
| H | -8.162220  | 0.158171  | -2.059732 | H  | 0.439729  | -4.276669 | 1.305281  |
| C | -7.624739  | -1.419767 | -0.672394 | C  | 1.765856  | -5.065569 | 2.837277  |
| C | -6.600900  | -1.943456 | 0.121198  | H  | 2.483111  | -4.688982 | 3.574406  |
| H | -6.811182  | -2.827728 | 0.719927  | H  | 2.300788  | -5.742803 | 2.161833  |
| C | -5.350869  | -1.340669 | 0.137984  | H  | 0.996384  | -5.641170 | 3.363398  |
| H | -4.551396  | -1.744114 | 0.756499  | C  | 0.458485  | -0.952676 | 4.789890  |
| O | -8.816191  | -2.084117 | -0.627409 | H  | 0.042474  | -0.319091 | 5.580736  |
| C | -9.864221  | -1.568215 | -1.413775 | H  | 1.426212  | -0.542132 | 4.479270  |
| H | -10.129581 | -0.542480 | -1.117188 | H  | 0.629972  | -1.953569 | 5.195347  |
| H | -9.609380  | -1.569815 | -2.484224 | H  | 1.501991  | -1.239307 | 2.362605  |
| H | -10.720490 | -2.224985 | -1.246102 | C  | -1.841381 | -1.665455 | 4.115494  |
| C | -3.893305  | 1.901308  | -0.198906 | H  | -2.222225 | -1.011062 | 4.908627  |
| C | -4.035005  | 2.142651  | 1.175481  | H  | -1.568138 | -2.611898 | 4.601237  |
| C | -4.078631  | 2.987057  | -1.054016 | C  | -2.916220 | -1.902101 | 3.070326  |
| C | -4.339638  | 3.401150  | 1.665587  | H  | -2.645800 | -2.720578 | 2.393070  |
| H | -3.907061  | 1.305226  | 1.862078  | H  | -3.862811 | -2.169360 | 3.554703  |
| C | -4.365283  | 4.269296  | -0.579214 | H  | -3.089297 | -1.022092 | 2.438681  |
| H | -3.997123  | 2.862409  | -2.132858 |    |           |           |           |
| C | -4.500965  | 4.480945  | 0.790880  |    |           |           |           |

**TSb**

M06L SCF energy in Solvent: -7173.943423 a.u.

PBE0-D3BJ Free energy in Solvent: -7172.835583 a.u.

|   |          |           |           |
|---|----------|-----------|-----------|
| O | 0.797739 | -0.081146 | -0.643580 |
| C | 1.253632 | 0.793285  | -1.573343 |
| C | 2.641605 | 1.071038  | -1.712586 |
| C | 3.057631 | 1.824162  | -2.808429 |
| H | 4.125862 | 1.999145  | -2.937498 |
| C | 2.174750 | 2.395273  | -3.728189 |
| C | 0.817011 | 2.225564  | -3.487054 |
| H | 0.087468 | 2.712712  | -4.139103 |
| C | 0.343994 | 1.456481  | -2.422201 |
| C | 2.679417 | 3.191144  | -4.893123 |
| H | 1.861489 | 3.696721  | -5.419565 |
| H | 3.198186 | 2.560544  | -5.628378 |
| H | 3.397658 | 3.959664  | -4.579342 |
| C | 3.643389 | 0.649709  | -0.610911 |
| O | 3.136185 | 1.079464  | 0.634817  |
| C | 5.001008 | 1.373900  | -0.771379 |
| C | 5.093449 | 2.793858  | -0.565429 |
| C | 6.152018 | 0.676992  | -1.081967 |
| C | 3.973122 | 3.625616  | -0.297360 |
| C | 6.376714 | 3.427991  | -0.670395 |
| C | 7.410487 | 1.305885  | -1.180783 |
| H | 6.101056 | -0.395471 | -1.254808 |
| C | 4.113298 | 4.984354  | -0.133227 |
| H | 2.993454 | 3.168729  | -0.212174 |
| C | 6.485252 | 4.828149  | -0.484481 |
| C | 7.523074 | 2.654818  | -0.972369 |
| H | 8.287829 | 0.707973  | -1.422286 |
| C | 5.379170 | 5.597540  | -0.220264 |
| H | 3.232635 | 5.592698  | 0.068814  |
| H | 7.473051 | 5.283073  | -0.565455 |
| H | 8.488824 | 3.155997  | -1.043988 |
| H | 5.476680 | 6.673729  | -0.084271 |
| C | 3.860073 | -0.882278 | -0.656254 |
| C | 4.259349 | -1.640762 | 0.499337  |
| C | 3.723348 | -1.542815 | -1.862336 |
| C | 4.555685 | -1.068825 | 1.771332  |
| C | 4.410533 | -3.065374 | 0.371536  |
| C | 3.960025 | -2.923918 | -1.998740 |
| H | 3.419459 | -0.973659 | -2.739113 |
| C | 4.877973 | -1.856182 | 2.854547  |
| H | 4.521419 | 0.010869  | 1.871423  |

|    |           |           |           |
|----|-----------|-----------|-----------|
| C  | 4.730384  | -3.843511 | 1.512030  |
| C  | 4.278327  | -3.676653 | -0.897808 |
| H  | 3.852415  | -3.390045 | -2.976043 |
| C  | 4.944974  | -3.258421 | 2.736738  |
| H  | 5.096138  | -1.383518 | 3.811278  |
| H  | 4.825957  | -4.923888 | 1.387954  |
| H  | 4.448048  | -4.750950 | -0.980515 |
| H  | 5.191895  | -3.870145 | 3.603433  |
| H  | 1.510453  | -2.586743 | -0.297302 |
| Si | 0.570612  | -3.368227 | -1.096441 |
| O  | -1.017330 | -2.836769 | -1.040543 |
| O  | 1.042756  | -3.234508 | -2.668739 |
| O  | 0.451389  | -4.935177 | -0.574034 |
| C  | -2.045319 | -3.583862 | -0.370359 |
| H  | -1.641315 | -4.143370 | 0.477655  |
| H  | -2.791354 | -2.864805 | -0.015029 |
| H  | -2.499505 | -4.282087 | -1.084477 |
| C  | 1.590527  | -5.701401 | -0.247546 |
| H  | 2.151580  | -5.989250 | -1.149436 |
| H  | 2.272906  | -5.154787 | 0.422220  |
| H  | 1.253819  | -6.611671 | 0.260548  |
| C  | 0.413688  | -3.975389 | -3.694401 |
| H  | 0.177657  | -3.303144 | -4.528210 |
| H  | 1.094483  | -4.757728 | -4.055860 |
| H  | -0.519400 | -4.456834 | -3.365146 |
| O  | -2.952954 | -0.469739 | 0.207499  |
| N  | -1.737528 | 0.089905  | -2.218413 |
| C  | -1.131602 | 1.431593  | -2.157903 |
| H  | -1.353175 | 1.846050  | -1.161236 |
| H  | -1.636137 | 2.087852  | -2.892572 |
| C  | -1.378677 | -0.612918 | -3.466850 |
| H  | -1.364873 | 0.114884  | -4.297942 |
| H  | -0.365085 | -1.024260 | -3.377870 |
| C  | -2.461797 | -1.668896 | -3.672634 |
| H  | -2.079314 | -2.674293 | -3.468764 |
| H  | -2.812782 | -1.662634 | -4.710882 |
| C  | -3.571967 | -1.299999 | -2.685640 |
| H  | -3.598998 | -2.006736 | -1.847036 |
| H  | -4.570893 | -1.307690 | -3.132534 |
| C  | -3.217569 | 0.081438  | -2.133944 |
| H  | -3.620037 | 0.869196  | -2.800125 |
| C  | -3.742723 | 0.264614  | -0.664052 |
| C  | -5.187978 | -0.266601 | -0.639930 |
| C  | -6.189120 | 0.334754  | -1.401733 |



|   |           |           |           |    |            |           |           |
|---|-----------|-----------|-----------|----|------------|-----------|-----------|
| H | 5.591184  | 0.772615  | -2.468775 | C  | -3.968578  | 0.178894  | -0.552236 |
| C | 3.925725  | 4.108663  | 2.026103  | C  | -5.299164  | -0.598189 | -0.551747 |
| H | 2.804713  | 2.585005  | 1.043260  | C  | -6.443612  | -0.095286 | -1.168346 |
| C | 6.174790  | 4.488671  | 1.264894  | H  | -6.423184  | 0.898282  | -1.618592 |
| C | 7.074604  | 3.192746  | -0.625930 | C  | -7.630544  | -0.824014 | -1.217150 |
| H | 7.710001  | 2.025181  | -2.303400 | H  | -8.501853  | -0.395667 | -1.706300 |
| C | 5.150534  | 4.799878  | 2.125564  | C  | -7.685920  | -2.087337 | -0.624105 |
| H | 3.102661  | 4.356466  | 2.697411  | C  | -6.549420  | -2.600588 | 0.006869  |
| H | 7.125733  | 5.019862  | 1.318983  | H  | -6.612925  | -3.584900 | 0.466880  |
| H | 8.007156  | 3.751609  | -0.542403 | C  | -5.374809  | -1.863493 | 0.036101  |
| H | 5.280112  | 5.579133  | 2.875158  | H  | -4.482561  | -2.258259 | 0.517826  |
| C | 3.494758  | -0.283084 | -1.861153 | O  | -8.792872  | -2.886243 | -0.606509 |
| C | 4.291135  | -1.423595 | -1.486373 | C  | -9.944129  | -2.392220 | -1.249133 |
| C | 2.833314  | -0.316840 | -3.075482 | H  | -10.303740 | -1.461818 | -0.784694 |
| C | 5.077792  | -1.477916 | -0.301622 | H  | -9.764087  | -2.204406 | -2.318400 |
| C | 4.325054  | -2.565998 | -2.356378 | H  | -10.707302 | -3.165917 | -1.142106 |
| C | 2.874623  | -1.438654 | -3.927527 | C  | -4.252457  | 1.572461  | 0.042381  |
| H | 2.249919  | 0.547354  | -3.384675 | C  | -4.159202  | 1.716798  | 1.434154  |
| C | 5.815793  | -2.596013 | 0.014158  | C  | -4.666923  | 2.686009  | -0.687219 |
| H | 5.080622  | -0.620409 | 0.362736  | C  | -4.455420  | 2.914336  | 2.061287  |
| C | 5.091166  | -3.701157 | -1.993589 | H  | -3.835405  | 0.856241  | 2.016301  |
| C | 3.599235  | -2.547498 | -3.571606 | C  | -4.954669  | 3.909303  | -0.076259 |
| H | 2.322658  | -1.416567 | -4.866320 | H  | -4.763491  | 2.630702  | -1.771835 |
| C | 5.818469  | -3.724864 | -0.828997 | C  | -4.850482  | 4.026595  | 1.309048  |
| H | 6.409186  | -2.603765 | 0.926895  | H  | -4.395791  | 3.018583  | 3.143683  |
| H | 5.093691  | -4.558110 | -2.668465 | H  | -5.260619  | 4.752736  | -0.689862 |
| H | 3.636390  | -3.425722 | -4.217419 | O  | -5.108078  | 5.165073  | 2.015212  |
| H | 6.403752  | -4.603621 | -0.563454 | C  | -5.526750  | 6.289435  | 1.277186  |
| O | -3.035306 | -0.492822 | 0.226117  | H  | -6.464859  | 6.094336  | 0.736556  |
| N | -2.032620 | 0.536053  | -2.159531 | H  | -5.688456  | 7.087202  | 2.005096  |
| C | -1.646408 | 1.904049  | -1.780995 | H  | -4.762570  | 6.608435  | 0.552660  |
| H | -1.987116 | 2.038730  | -0.746828 | Zn | -1.286468  | -0.577212 | -0.518858 |
| H | -2.216291 | 2.625632  | -2.395995 | Zn | 1.813489   | -0.865605 | 0.345744  |
| C | -1.656241 | 0.160927  | -3.527823 | C  | -0.317859  | -3.211725 | 1.735127  |
| H | -1.974006 | 0.958169  | -4.225539 | C  | 0.049494   | -3.121154 | 0.226934  |
| H | -0.565690 | 0.073233  | -3.603253 | O  | -0.719751  | -2.504903 | -0.583289 |
| C | -2.413586 | -1.142093 | -3.775785 | O  | 0.607263   | -4.286605 | -0.205656 |
| H | -1.754590 | -2.007766 | -3.638870 | C  | 1.044888   | -4.252148 | -1.569694 |
| H | -2.789570 | -1.187373 | -4.803409 | H  | 1.615343   | -3.318954 | -1.719893 |
| C | -3.544193 | -1.142667 | -2.733362 | H  | 0.170171   | -4.215261 | -2.231142 |
| H | -3.374309 | -1.920590 | -1.975527 | C  | 1.901660   | -5.465877 | -1.804445 |
| H | -4.533084 | -1.329680 | -3.162476 | H  | 2.771186   | -5.461168 | -1.137334 |
| C | -3.481237 | 0.223159  | -2.045353 | H  | 2.264850   | -5.475307 | -2.838362 |
| H | -4.055756 | 0.967172  | -2.627063 | H  | 1.337106   | -6.389366 | -1.633166 |

|    |           |           |          |   |           |           |           |
|----|-----------|-----------|----------|---|-----------|-----------|-----------|
| C  | -1.416443 | -4.281122 | 1.857485 | C | 2.506157  | 3.169578  | -1.658198 |
| H  | -1.030932 | -5.275656 | 1.617545 | H | 3.557658  | 3.446293  | -1.734889 |
| H  | -2.242194 | -4.058857 | 1.170837 | C | 1.555677  | 4.012283  | -2.240205 |
| H  | -1.810716 | -4.305469 | 2.880494 | C | 0.220436  | 3.637591  | -2.136110 |
| C  | 0.887359  | -3.566790 | 2.598277 | H | -0.553826 | 4.278043  | -2.565950 |
| C  | 1.513270  | -4.815362 | 2.475966 | C | -0.169672 | 2.468880  | -1.482087 |
| C  | 1.408073  | -2.672037 | 3.541206 | C | 1.966688  | 5.277893  | -2.930181 |
| C  | 2.617913  | -5.146804 | 3.252206 | H | 1.123597  | 5.743045  | -3.454123 |
| H  | 1.137904  | -5.535805 | 1.754636 | H | 2.760137  | 5.104025  | -3.668421 |
| C  | 2.519378  | -2.998973 | 4.316170 | H | 2.358467  | 6.019645  | -2.221022 |
| H  | 0.941073  | -1.701390 | 3.691650 | C | 3.288965  | 1.073260  | -0.418007 |
| C  | 3.132332  | -4.237864 | 4.173712 | O | 2.953654  | 0.612416  | 0.885462  |
| H  | 3.080883  | -6.125197 | 3.133862 | C | 4.609911  | 1.853215  | -0.281740 |
| H  | 2.900515  | -2.276254 | 5.036623 | C | 4.735895  | 2.887011  | 0.704971  |
| H  | 3.999692  | -4.496795 | 4.778151 | C | 5.682349  | 1.592247  | -1.110674 |
| H  | 1.299937  | -2.388677 | 0.350066 | C | 3.672307  | 3.291060  | 1.554520  |
| Si | -0.284693 | 0.766998  | 2.418558 | C | 5.984466  | 3.584193  | 0.823019  |
| O  | -1.064586 | 1.792259  | 1.417130 | C | 6.907931  | 2.278947  | -0.989879 |
| C  | -0.726123 | 3.169879  | 1.312701 | H | 5.587386  | 0.832317  | -1.883952 |
| H  | -1.424136 | 3.627154  | 0.603242 | C | 3.836851  | 4.304616  | 2.470315  |
| H  | -0.835438 | 3.680154  | 2.279976 | H | 2.721440  | 2.774124  | 1.480898  |
| H  | 0.300874  | 3.300607  | 0.947942 | C | 6.122030  | 4.612659  | 1.787091  |
| O  | 1.208588  | 1.405143  | 2.604383 | C | 7.060313  | 3.249632  | -0.033766 |
| C  | 2.276874  | 0.796424  | 3.308827 | H | 7.729172  | 2.028839  | -1.659808 |
| H  | 3.144641  | 1.457397  | 3.230520 | C | 5.072717  | 4.969948  | 2.597853  |
| H  | 2.014939  | 0.645072  | 4.367090 | H | 3.000641  | 4.594098  | 3.105135  |
| H  | 2.552688  | -0.171115 | 2.864352 | H | 7.083329  | 5.121777  | 1.864970  |
| O  | -1.070354 | 0.497129  | 3.837420 | H | 8.003053  | 3.786742  | 0.075211  |
| C  | -1.563596 | 1.588995  | 4.594578 | H | 5.191366  | 5.765569  | 3.332003  |
| H  | -2.279067 | 2.183622  | 4.008985 | C | 3.465561  | -0.154338 | -1.358084 |
| H  | -2.073542 | 1.187087  | 5.474586 | C | 4.217025  | -1.306149 | -0.926794 |
| H  | -0.746803 | 2.245092  | 4.930416 | C | 2.866011  | -0.191172 | -2.604072 |
| C  | -0.976338 | -1.896648 | 2.152442 | C | 4.941085  | -1.358064 | 0.297372  |
| O  | -0.175404 | -0.755204 | 1.746823 | C | 4.261309  | -2.464782 | -1.773762 |
| H  | -1.961132 | -1.790246 | 1.680084 | C | 2.932948  | -1.323554 | -3.440983 |
| H  | -1.117799 | -1.869820 | 3.238879 | H | 2.316905  | 0.681400  | -2.951722 |

**TS(3a)**

M06L SCF energy in Solvent: -6534.705321 a.u.

PBE0-D3BJ Free energy in Solvent: -6533.744562 a.u.

|   |          |          |           |   |          |           |           |
|---|----------|----------|-----------|---|----------|-----------|-----------|
| O | 0.431872 | 0.460187 | -0.355966 | H | 2.316905 | 0.681400  | -2.951722 |
| C | 0.810179 | 1.619133 | -0.924096 | C | 5.634157 | -2.488308 | 0.667086  |
| C | 2.179218 | 1.988909 | -0.992015 | H | 4.926751 | -0.489426 | 0.947703  |
|   |          |          |           | C | 4.975840 | -3.613733 | -1.352284 |

|   |            |           |           |    |           |           |           |
|---|------------|-----------|-----------|----|-----------|-----------|-----------|
| C | 3.608231   | -2.444365 | -3.029546 | C  | -4.241059 | 1.849616  | 0.513473  |
| H | 2.439311   | -1.300133 | -4.411851 | C  | -4.065270 | 1.984441  | 1.898425  |
| C | 5.646242   | -3.633312 | -0.154190 | C  | -4.729394 | 2.959641  | -0.174872 |
| H | 6.180612   | -2.494366 | 1.609062  | C  | -4.342413 | 3.168789  | 2.557842  |
| H | 4.993685   | -4.480621 | -2.014365 | H  | -3.703445 | 1.123602  | 2.456661  |
| H | 3.662028   | -3.332284 | -3.660920 | C  | -5.008131 | 4.167212  | 0.468629  |
| H | 6.195009   | -4.521760 | 0.154992  | H  | -4.899519 | 2.915792  | -1.250441 |
| O | -2.930543  | -0.157071 | 0.600141  | C  | -4.811971 | 4.277157  | 1.844332  |
| N | -2.083913  | 0.874413  | -1.801159 | H  | -4.204124 | 3.264353  | 3.632836  |
| C | -1.635759  | 2.191688  | -1.306378 | H  | -5.373447 | 5.008838  | -0.114414 |
| H | -1.905285  | 2.224531  | -0.240667 | O  | -5.049106 | 5.402642  | 2.574748  |
| H | -2.224922  | 2.983332  | -1.803088 | C  | -5.522062 | 6.528709  | 1.872204  |
| C | -1.808855  | 0.629555  | -3.222036 | H  | -6.488030 | 6.327501  | 1.385465  |
| H | -2.171064  | 1.486301  | -3.819615 | H  | -5.649944 | 7.318166  | 2.615572  |
| H | -0.727201  | 0.548690  | -3.384881 | H  | -4.804179 | 6.861229  | 1.107876  |
| C | -2.594126  | -0.646609 | -3.524833 | Zn | -1.301762 | -0.475950 | -0.376906 |
| H | -1.934649  | -1.523222 | -3.502597 | Zn | 1.715736  | -0.760847 | 0.654091  |
| H | -3.037585  | -0.608630 | -4.525282 | C  | -1.195737 | -2.115994 | 2.251391  |
| C | -3.653936  | -0.728546 | -2.411395 | O  | -0.616317 | -0.846624 | 1.920065  |
| H | -3.444222  | -1.568863 | -1.733542 | C  | -0.362847 | -3.279719 | 1.716697  |
| H | -4.670772  | -0.881402 | -2.785693 | C  | -0.173515 | -3.096669 | 0.185875  |
| C | -3.531638  | 0.582334  | -1.630923 | O  | -1.000993 | -2.450630 | -0.527443 |
| H | -4.116485  | 1.369544  | -2.138740 | O  | 0.431872  | -4.171124 | -0.353060 |
| C | -3.941234  | 0.476599  | -0.115905 | C  | 0.695184  | -4.080200 | -1.763708 |
| C | -5.228423  | -0.369412 | -0.068067 | H  | 1.172078  | -3.105779 | -1.955736 |
| C | -6.457120  | 0.123432  | -0.504282 | H  | -0.258543 | -4.103868 | -2.305167 |
| H | -6.539419  | 1.161429  | -0.828538 | C  | 1.600276  | -5.226269 | -2.122180 |
| C | -7.601613  | -0.672656 | -0.525096 | H  | 2.542512  | -5.161616 | -1.565322 |
| H | -8.541364  | -0.248470 | -0.869385 | H  | 1.831387  | -5.203983 | -3.192803 |
| C | -7.526442  | -1.998090 | -0.092675 | H  | 1.129754  | -6.189587 | -1.895674 |
| C | -6.301897  | -2.506653 | 0.350376  | C  | -1.234770 | -4.533903 | 1.907911  |
| H | -6.261145  | -3.541463 | 0.684754  | H  | -0.707704 | -5.440797 | 1.602201  |
| C | -5.173737  | -1.700825 | 0.355990  | H  | -2.154711 | -4.458642 | 1.314641  |
| H | -4.215741  | -2.098473 | 0.686695  | H  | -1.513471 | -4.639848 | 2.963000  |
| O | -8.579856  | -2.864472 | -0.063072 | C  | 0.981598  | -3.433880 | 2.421622  |
| C | -9.823846  | -2.369138 | -0.500098 | C  | 1.787964  | -4.551810 | 2.173893  |
| H | -10.164919 | -1.524764 | 0.117020  | C  | 1.485112  | -2.440341 | 3.273407  |
| H | -9.787111  | -2.045435 | -1.551030 | C  | 3.053763  | -4.663799 | 2.739026  |
| H | -10.530866 | -3.195601 | -0.402377 | H  | 1.436355  | -5.333636 | 1.506031  |

|   |           |           |          |
|---|-----------|-----------|----------|
| C | 2.752548  | -2.555616 | 3.844930 |
| H | 0.891157  | -1.555904 | 3.493547 |
| C | 3.544293  | -3.665820 | 3.576307 |
| H | 3.663767  | -5.537876 | 2.515606 |
| H | 3.118565  | -1.762971 | 4.495103 |
| H | 4.537950  | -3.752012 | 4.012638 |
| H | 1.136051  | -2.191098 | 0.272616 |
| H | -2.205448 | -2.156928 | 1.823354 |
| H | -1.278866 | -2.213424 | 3.344964 |
| H | -1.333202 | -0.184948 | 2.004421 |
